# Supplementary material for: Atlas of CRISPR Correction of Pathogenic Human Genetic Variants
Source: Research Square preprint supplement (doi:10.21203/rs.3.rs-6107416/v1), 2025-03-25
Supplement: Supplementary file 1 [file edc4164a6b288440348514bd.xlsx]

## Sheet: Supplementary Table 1
HGVS_Simple	GeneName	Editor	Guide_ID	Coordinates	Strand	gRNA	Pam	Extended Guide Site	Azimuth Score	Variant Position	DeepCas9 Score	DeepCpf1 Score	OOF Score	Ref>Alt	Annotation	Alternate (Codon>AA)	ABE score	Bystander	Base Editor	Hg38 Reference (Codon>AA)	CBE Score	BE Converted (Codon>AA)	Conversion Type	PCA
NM_001363118.2:c.851C>A	SLC52A2	spCas9	spCas9_0	8:144360320-144360343	+	TGCCTGCCTGCTGGGCCTGT	TGG	CAGTGCCTGCCTGCTGGGCCTGTTGGaCGC	20	7	23.55	-	55.09	C>A	exon									-0.328927
NM_001363118.2:c.851C>A	SLC52A2	spCas9	spCas9_1	8:144360334-144360357	-	GCGCGTTGGTGGCGtCCAAC	AGG	TCAGCGCGTTGGTGGCGtCCAACAGGCCCA	51.12	-3	60.94	-	57.65	C>A	exon									0.159273
NM_001363118.2:c.1137G>A	SLC52A2	saCas9	saCas9_2	8:144360790-144360817	+	GTGTCCCCCTCAGGTGCTGTC	GTGaGT	GCTGTGTCCCCCTCAGGTGCTGTCGTGaGTGCTG	-	7	-	-	57.64	G>A	exon
NM_001363118.2:c.551del	SLC52A2	spCas9	spCas9_3	8:144360015-144360038	+	GCCCCCATCAACGGCACCCC	TGg	CCAGCCCCCATCAACGGCACCCCTGgCCCC	47.71	6	46.32	-	64.59	GC>G	exon									0.0169604
NM_001363118.2:c.551del	SLC52A2	spCas9	spCas9_4	8:144360037-144360060	-	CGCTCAAGGAAGTCGAGCGG	GGG	AAACGCTCAAGGAAGTCGAGCGGGGGcCAG	64.37	7	59.65	-	61.68	GC>G	exon									0.224582
NM_001363118.2:c.551del	SLC52A2	saCas9	saCas9_8	8:144360029-144360056	-	CAAGGAAGTCGAGCGGGGGcC	AGGGGT	GCTCAAGGAAGTCGAGCGGGGGcCAGGGGTGCCG	-	2	-	-	63.37	GC>G	exon
NM_001363118.2:c.916G>A	SLC52A2	spCas9	spCas9_9	8:144360388-144360411	+	GCTTTTCCTGCTTACCCTAC	aGG	AGAGCTTTTCCTGCTTACCCTACaGGCGTC	44.35	4	42.57	-	58.13	G>A	exon									-0.0315034
NM_001363118.2:c.916G>A	SLC52A2	spCas9	spCas9_11	8:144360402-144360425	-	GTGGTAGGCCAGACGCCtGT	AGG	CAGGTGGTAGGCCAGACGCCtGTAGGGTAA	52.49	1	61.91	-	73.54	G>A	exon									0.170392
NM_001363118.2:c.916G>A	SLC52A2	saCas9	saCas9_13	8:144360400-144360427	-	AGGTGGTAGGCCAGACGCCtG	TAGGGT	GCCAGGTGGTAGGCCAGACGCCtGTAGGGTAAGC	-	2	-	-	61.35	G>A	exon
NM_001363118.2:c.916G>A	SLC52A2	CasX	CasX_14	8:144360392-144360416	+	TGCTTACCCTACaGGCGTCT	TTCC	AGCTTTTCCTGCTTACCCTACaGGCGTCTGGCC	-	-7	-	-	-	G>A	exon
NM_001363118.2:c.916G>A	SLC52A2	Cas12a	Cas12a_15	8:144360391-144360416	+	CTGCTTACCCTACaGGCGTCT	TTTC	GAGCTTTTCCTGCTTACCCTACaGGCGTCTGGCC	-	-5	-	27.95	-	G>A	exon
NM_001363118.2:c.543del	SLC52A2	spCas9	spCas9_16	8:144360014-144360037	+	AGCCCCCATCAACGGCACCC	cGG	GCCAGCCCCCATCAACGGCACCCcGGCCCC	44.35	4	50.35	-	66.14	CT>C	exon									0.0300943
NM_001363118.2:c.543del	SLC52A2	spCas9	spCas9_17	8:144360032-144360055	-	AAGGAAGTCGAGCGGGGGGC	CgG	CTCAAGGAAGTCGAGCGGGGGGCCgGGGTG	35.68	5	18.22	-	65.74	CT>C	exon									-0.284739
NM_001363118.2:c.543del	SLC52A2	saCas9	saCas9_20	8:144360029-144360056	-	CAAGGAAGTCGAGCGGGGGGC	CgGGGT	GCTCAAGGAAGTCGAGCGGGGGGCCgGGGTGCCG	-	5	-	-	64.8	CT>C	exon
NM_001363118.2:c.149dup	SLC52A2	spCas9	spCas9_21	8:144359634-144359657	-	CAAGCACAGAGACGTAtaAG	AGG	CCACAAGCACAGAGACGTAtaAGAGGGGAG	51.42	1	67.01	-	68.54	T>TA	exon									0.207664
NM_001363118.2:c.149dup	SLC52A2	CasX	CasX_25	8:144359613-144359637	+	CTGCAGGTTGGAGCCTCCCC	TTCC	CTCCCTTCCCTGCAGGTTGGAGCCTCCCCTCTt	-	5	-	-	-	T>TA	exon
NM_001363118.2:c.1016T>C	SLC52A2	spCas9	spCas9_26	8:144360584-144360607	+	CTGCAGGTCCTTGGCAGGGC	cGG	TCACTGCAGGTCCTTGGCAGGGCcGGGCGG	37.06	4	32.55	-	73.58	T>C	exon									-0.161139
NM_001363118.2:c.1016T>C	SLC52A2	spCas9	spCas9_29	8:144360602-144360625	-	CCCAGCAGAGAGAGGCCGCC	CgG	ACGCCCAGCAGAGAGAGGCCGCCCgGCCCT	53.33	5	60.77	-	62.76	T>C	exon									0.169185
NM_001363118.2:c.935T>C	SLC52A2	spCas9	spCas9_31	8:144360407-144360430	+	CGGGCGTCTGGCCTACCACC	cGG	CTACGGGCGTCTGGCCTACCACCcGGCTGT	52.76	4	55.27	-	72.77	T>C	exon									0.117543
NM_001363118.2:c.935T>C	SLC52A2	spCas9	spCas9_33	8:144360425-144360448	-	GCACTGCCCAGCACCACAGC	CgG	GCAGCACTGCCCAGCACCACAGCCgGGTGG	56.6	5	47.71	-	64.18	T>C	exon									0.080294
NM_001363118.2:c.935T>C	SLC52A2	saCas9	saCas9_37	8:144360423-144360450	-	CAGCACTGCCCAGCACCACAG	CCgGGT	TGGCAGCACTGCCCAGCACCACAGCCgGGTGGTA	-	6	-	-	72.89	T>C	exon
NM_001363118.2:c.383C>T	SLC52A2	spCas9	spCas9_38	8:144359871-144359894	-	GGGCAGGAAAGTGACATTCa	AGG	GAAGGGCAGGAAAGTGACATTCaAGGCACA	48.46	3	40.73	-	61.37	C>T	exon									-0.0237034
NM_001363118.2:c.383C>T	SLC52A2	saCas9	saCas9_39	8:144359853-144359880	+	CTGGCACTGGCATGCTGTGCC	TtGAAT	GTGCTGGCACTGGCATGCTGTGCCTtGAATGTCA	-	5	-	-	68.05	C>T	exon
NM_001363118.2:c.383C>T	SLC52A2	Cas12a	Cas12a_40	8:144359847-144359872	+	TGCTGGCACTGGCATGCTGTG	TTTG	TGGCCTTTGTGCTGGCACTGGCATGCTGTGCCTt	-	7	-	57.02	-	C>T	exon
NM_001363118.2:c.368T>C	SLC52A2	spCas9	spCas9_41	8:144359840-144359863	+	ACTGGCCTTTGTGCTGGCAC	cGG	AGCACTGGCCTTTGTGCTGGCACcGGCATG	43.03	4	60.68	-	51.01	T>C	exon									0.112048
NM_001363118.2:c.368T>C	SLC52A2	spCas9	spCas9_42	8:144359858-144359881	-	ACATTCGAGGCACAGCATGC	CgG	GTGACATTCGAGGCACAGCATGCCgGTGCC	45.58	5	23.88	-	66.95	T>C	exon									-0.180871
NM_001363118.2:c.368T>C	SLC52A2	CasX	CasX_43	8:144359832-144359856	+	TAGCACTGGCCTTTGTGCTG	TTCT	TGGCCTTCTTAGCACTGGCCTTTGTGCTGGCAC	-	6	-	-	-	T>C	exon
NM_001363118.2:c.368T>C	SLC52A2	CasX	CasX_44	8:144359854-144359878	-	AGGCACAGCATGCCgGTGCC	TTCG	TGACATTCGAGGCACAGCATGCCgGTGCCAGCA	-	-5	-	-	-	T>C	exon
NM_001363118.2:c.1140del	SLC52A2	spCas9	spCas9_45	8:144360793-144360816	+	TCCCCCTCAGGTGCTGTCGT	GGG	GTGTCCCCCTCAGGTGCTGTCGTGGGtCTG	55.91	7	46.89	-	69.1	TG>T	exon									0.068027
NM_001363118.2:c.1140del	SLC52A2	CasX	CasX_47	8:144360821-144360845	-	CGTAGGAGAACACGCCAAGA	TTCA	CCACCTTCACGTAGGAGAACACGCCAAGACACA	-	7	-	-	-	TG>T	exon
NM_001363118.2:c.593G>A	SLC52A2	spCas9	spCas9_48	8:144360065-144360088	+	TCCCGCCAGCACCTTCTTCT	aGG	TTTTCCCGCCAGCACCTTCTTCTaGGCACT	36.83	4	25.18	-	59.96	G>A	exon									-0.218992
NM_001363118.2:c.593G>A	SLC52A2	spCas9	spCas9_49	8:144360075-144360098	-	GGCAGTCAGTGCCtAGAAGA	AGG	AAGGGCAGTCAGTGCCtAGAAGAAGGTGCT	46.9	-4	57.63	-	68.01	G>A	exon									0.104296
NM_001363118.2:c.593G>A	SLC52A2	CasX	CasX_50	8:144360064-144360088	+	CGCCAGCACCTTCTTCTaGG	TTCC	GCGTTTTCCCGCCAGCACCTTCTTCTaGGCACT	-	-2	-	-	-	G>A	exon
NM_001363118.2:c.593G>A	SLC52A2	Cas12a	Cas12a_51	8:144360063-144360088	+	CCGCCAGCACCTTCTTCTaGG	TTTC	AGCGTTTTCCCGCCAGCACCTTCTTCTaGGCACT	-	1	-	53.09	-	G>A	exon
NM_001363118.2:c.595del	SLC52A2	spCas9	spCas9_52	8:144360064-144360087	+	TTCCCGCCAGCACCTTCTTC	tGG	GTTTTCCCGCCAGCACCTTCTTCtGGCACT	27.58	4	47.18	-	56.25	TG>T	exon									-0.0906376
NM_001363118.2:c.595del	SLC52A2	spCas9	spCas9_53	8:144360075-144360098	-	GGGCAGTCAGTGCCaGAAGA	AGG	GAAGGGCAGTCAGTGCCaGAAGAAGGTGCT	46.09	-3	40.1	-	51.82	TG>T	exon									-0.0397791
NM_001363118.2:c.595del	SLC52A2	CasX	CasX_54	8:144360064-144360088	+	CGCCAGCACCTTCTTCtGGC	TTCC	GCGTTTTCCCGCCAGCACCTTCTTCtGGCACTG	-	-3	-	-	-	TG>T	exon
NM_001363118.2:c.595del	SLC52A2	Cas12a	Cas12a_55	8:144360063-144360088	+	CCGCCAGCACCTTCTTCtGGC	TTTC	AGCGTTTTCCCGCCAGCACCTTCTTCtGGCACTG	-	-1	-	51.65	-	TG>T	exon
NM_001363118.2:c.54_55del	SLC52A2	spCas9	spCas9_56	8:144359320-144359343	+	GGTGCTGACCCACCTGCTGG	TGg	TCCGGTGCTGACCCACCTGCTGGTGgCTCT	52.82	6	70.82	-	53.36	GCT>G	exon									0.251804
NM_001363118.2:c.54_55del	SLC52A2	spCas9	spCas9_58	8:144359331-144359354	-	CATGCCGAAGAGcCACCAGC	AGG	GCCCATGCCGAAGAGcCACCAGCAGGTGGG	59.5	-5	53.6	-	64.88	GCT>G	exon									0.14545
NM_001363118.2:c.54_55del	SLC52A2	saCas9	saCas9_59	8:144359326-144359353	-	ATGCCGAAGAGcCACCAGCAG	GTGGGT	CCCATGCCGAAGAGcCACCAGCAGGTGGGTCAGC	-	-7	-	-	61.75	GCT>G	exon
NM_001363118.2:c.155C>T	SLC52A2	spCas9	spCas9_60	8:144359636-144359659	+	CTCTTACGTCTtTGTGCTTG	TGG	CCCCTCTTACGTCTtTGTGCTTGTGGCTCT	39.3	-6	35.3	-	71.66	C>T	exon									-0.124875
NM_001363118.2:c.155C>T	SLC52A2	spCas9	spCas9_61	8:144359634-144359657	-	CACAAGCACAaAGACGTAAG	AGG	AGCCACAAGCACAaAGACGTAAGAGGGGAG	45.96	-7	42.97	-	72.32	C>T	exon									-0.0231605
NM_001363118.2:c.155C>T	SLC52A2	CasX	CasX_62	8:144359644-144359668	-	CCAGAGCCACAAGCACAaAG	TTCC	CCAGGTTCCCCAGAGCCACAAGCACAaAGACGT	-	-2	-	-	-	C>T	exon
NM_001363118.2:c.808C>T	SLC52A2	spCas9	spCas9_63	8:144360294-144360317	-	GCGGGCTGATAGAAGCTaAT	AGG	ACTGCGGGCTGATAGAAGCTaATAGGCCTT	36.07	1	42.71	-	71.56	C>T	exon									-0.0826593
NM_001363118.2:c.808C>T	SLC52A2	saCas9	saCas9_65	8:144360285-144360312	-	CTGATAGAAGCTaATAGGCCT	TAGGGT	GGGCTGATAGAAGCTaATAGGCCTTAGGGTCTGG	-	-6	-	-	76.39	C>T	exon
NM_001363118.2:c.1094del	SLC52A2	spCas9	spCas9_66	8:144360661-144360684	+	TCCTGAGCCCCTGCCCGCCC	cGG	CAGTCCTGAGCCCCTGCCCGCCCcGGTGGG	35.14	4	50.53	-	71.06	CT>C	exon									-0.0235543
NM_001363118.2:c.1094del	SLC52A2	spCas9	spCas9_69	8:144360679-144360702	-	ACCCCCGCCGAGGTGCCCAC	CgG	ACCACCCCCGCCGAGGTGCCCACCgGGGCG	34.41	5	32.9	-	55.71	CT>C	exon									-0.168243
NM_001363118.2:c.751C>T	SLC52A2	spCas9	spCas9_76	8:144360236-144360259	-	TGGCTTGGTGGCTCTTaCAG	TGG	GCCTGGCTTGGTGGCTCTTaCAGTGGTGAG	43.97	-1	51.45	-	61.96	C>T	exon									0.0382098
NM_001363118.2:c.1076_1079del	SLC52A2	spCas9	spCas9_78	8:144360663-144360686	-	TGCCCACCAGGGGCGGGCAG	GGG	AGGTGCCCACCAGGGGCGGGCAGGGGgGAC	28.22	7	27.03	-	73.61	CTGAG>C	exon									-0.258061
NM_001363118.2:c.292_293del	SLC52A2	spCas9	spCas9_81	8:144359756-144359779	+	CATGGTGGGCACAGCCCTGC	TGG	GGGCATGGTGGGCACAGCCCTGCTGGcCTC	35.38	7	60.2	-	60.18	CCT>C	exon									0.0607552
NM_001363118.2:c.292_293del	SLC52A2	spCas9	spCas9_83	8:144359778-144359801	-	GGGGCCACATGGTGCCACAG	AGg	ACTGGGGCCACATGGTGCCACAGAGgCCAG	56.26	6	60.82	-	74.36	CCT>C	exon									0.183123
NM_020427.3:c.82del	SLURP1	spCas9	spCas9_86	8:142741878-142741901	+	CACTGGTCATGGGCTCCTTG	cGG	AAGCACTGGTCATGGGCTCCTTGcGGTGTA	30.82	4	43.81	-	76.79	GT>G	exon									-0.10577
NM_020427.3:c.82del	SLURP1	spCas9	spCas9_87	8:142741892-142741915	-	CCCTCAAGTGCTACACCgCA	AGG	AGGCCCTCAAGTGCTACACCgCAAGGAGCC	61.15	1	51.56	-	72.79	GT>G	exon									0.135855
NM_020427.3:c.229T>C	SLURP1	spCas9	spCas9_88	8:142741205-142741228	+	TGTCGGGGTCGGTGGCCACA	CgG	TGCTGTCGGGGTCGGTGGCCACACgGGAGC	48.94	5	52.84	-	61.44	T>C	exon									0.0787504
NM_020427.3:c.229T>C	SLURP1	spCas9	spCas9_91	8:142741219-142741242	-	CTCCTGCTCCAGCTCCcGTG	TGG	CCGCTCCTGCTCCAGCTCCcGTGTGGCCAC	50.55	-1	63.3	-	49.39	T>C	exon									0.177897
NM_020427.3:c.43T>C	SLURP1	spCas9	spCas9_92	8:142742322-142742345	+	ACTCACCACAGCCCATGCTC	CgG	CCCACTCACCACAGCCCATGCTCCgGGCTG	49	5	52.19	-	75.66	T>C	exon									0.0694156
NM_020427.3:c.43T>C	SLURP1	spCas9	spCas9_94	8:142742340-142742363	-	AGCTGCTGCTCGTGGCAGCC	cGG	TGCAGCTGCTGCTCGTGGCAGCCcGGAGCA	31.42	4	46.45	-	71.21	T>C	exon									-0.0788452
NM_020427.3:c.286C>T	SLURP1	CasX	CasX_97	8:142741142-142741166	+	GAGTTCCGAGTTGCAGAGGT	TTCA	CTGGGTTCAGAGTTCCGAGTTGCAGAGGTCTCa	-	5	-	-	-	C>T	exon
NM_020427.3:c.211C>T	SLURP1	spCas9	spCas9_99	8:142741224-142741247	+	ACAGGAGCTGGAGCAGGAGC	aGG	CACACAGGAGCTGGAGCAGGAGCaGGTCAC	59.87	4	68.64	-	42.89	C>T	exon									0.278104
NM_020427.3:c.211C>T	SLURP1	CasX	CasX_102	8:142741244-142741268	-	ACCAGAGCCCCGTGGTGACC	TTCA	ACCCCTTCAACCAGAGCCCCGTGGTGACCtGCT	-	2	-	-	-	C>T	exon
NM_020427.3:c.1A>C	SLURP1	spCas9	spCas9_103	8:142742364-142742387	+	CACAGCCCAGCGAGAGGCCA	TgG	CTGCACAGCCCAGCGAGAGGCCATgGCTCC	58.64	5	69.02	-	66.08	A>C	5utr									0.267001
NM_020427.3:c.1A>C	SLURP1	spCas9	spCas9_104	8:142742380-142742403	-	CACTTCTGAGCACGGAGCcA	TGG	CATCACTTCTGAGCACGGAGCcATGGCCTC	54.84	2	63.42	-	74.03	A>C	5utr									0.196356
NM_020427.3:c.256G>C	SLURP1	spCas9	spCas9_105	8:142741178-142741201	+	AGAAGATCAGGTGGGCGGCC	CgG	AGCAGAAGATCAGGTGGGCGGCCCgGATGC	40.62	5	42.07	-	60.52	G>C	exon									-0.0580675
NM_020427.3:c.256G>C	SLURP1	spCas9	spCas9_108	8:142741196-142741219	-	CCACCGACCCCGACAGCATC	cGG	TGGCCACCGACCCCGACAGCATCcGGGCCG	53.47	4	50.06	-	54.67	G>C	exon									0.0843096
NM_020427.3:c.256G>C	SLURP1	saCas9	saCas9_110	8:142741176-142741203	+	GCAGAAGATCAGGTGGGCGGC	CCgGAT	GCAGCAGAAGATCAGGTGGGCGGCCCgGATGCTG	-	6	-	-	64.95	G>C	exon
NM_020427.3:c.243C>A	SLURP1	spCas9	spCas9_112	8:142741189-142741212	+	TGGGCGGCCCCGATGCTGTC	GGG	AGGTGGGCGGCCCCGATGCTGTCGGGtTCG	58.33	7	64.14	-	55.47	C>A	exon									0.228262
NM_020427.3:c.256G>A	SLURP1	spCas9	spCas9_115	8:142741188-142741211	+	GTGGGCGGCCCtGATGCTGT	CGG	CAGGTGGGCGGCCCtGATGCTGTCGGGGTC	35.96	-6	35.56	-	56.69	G>A	exon									-0.137621
NM_020427.3:c.256G>A	SLURP1	spCas9	spCas9_117	8:142741196-142741219	-	CCACCGACCCCGACAGCATC	aGG	TGGCCACCGACCCCGACAGCATCaGGGCCG	62.06	4	64.13	-	48.72	G>A	exon									0.251957
NM_020427.3:c.256G>A	SLURP1	saCas9	saCas9_119	8:142741187-142741214	+	GGTGGGCGGCCCtGATGCTGT	CGGGGT	TCAGGTGGGCGGCCCtGATGCTGTCGGGGTCGGT	-	-6	-	-	58.35	G>A	exon
NM_020427.3:c.178+1G>A	SLURP1	spCas9	spCas9_120	8:142741796-142741819	-	GGTGACGGTGGAGGCAGaTG	AGG	GCTGGTGACGGTGGAGGCAGaTGAGGCCAG	59.81	1	73.31	-	67.89	G>A	exon									0.308575
NM_020427.3:c.296G>A	SLURP1	spCas9	spCas9_122	8:142741142-142741165	+	TTCAGAGTTCCGAGTTGtAG	AGG	GGGTTCAGAGTTCCGAGTTGtAGAGGTCTC	51.53	1	68.82	-	61.21	G>A	exon									0.225437
NM_020427.3:c.296G>A	SLURP1	spCas9	spCas9_124	8:142741150-142741173	-	CTTCCGAGACCTCTaCAACT	CGG	CTGCTTCCGAGACCTCTaCAACTCGGAACT	54.56	-3	45.66	-	46.45	G>A	exon									0.0569447
NM_020427.3:c.296G>A	SLURP1	CasX	CasX_125	8:142741142-142741166	+	GAGTTCCGAGTTGtAGAGGT	TTCA	CTGGGTTCAGAGTTCCGAGTTGtAGAGGTCTCG	-	-6	-	-	-	G>A	exon
NM_020427.3:c.296G>A	SLURP1	CasX	CasX_126	8:142741157-142741181	-	GCTGCTTCCGAGACCTCTaC	TTCT	TGATCTTCTGCTGCTTCCGAGACCTCTaCAACT	-	-1	-	-	-	G>A	exon
NM_022454.4:c.314C>A	SOX17	spCas9	spCas9_127	8:54459046-54459069	+	TCCACTGTGCAGGCAAGTaG	TGG	CCTTCCACTGTGCAGGCAAGTaGTGGAAGG	49.04	2	61.29	-	80.96	C>A	exon									0.142937
NM_022454.4:c.314C>A	SOX17	CasX	CasX_129	8:54459041-54459065	+	TTCCACTGTGCAGGCAAGTa	TTCC	CCCCCTTCCTTCCACTGTGCAGGCAAGTaGTGG	-	1	-	-	-	C>A	exon
NM_022454.4:c.314C>A	SOX17	CasX	CasX_131	8:54459067-54459091	-	CCGCCAGCGTCAGCGCCTTC	TTCT	GCCGCTTCTCCGCCAGCGTCAGCGCCTTCCACt	-	5	-	-	-	C>A	exon
NM_022454.4:c.499_520del	SOX17	spCas9	spCas9_132	8:54459218-54459241	+	GCACGGCCTGGCTGAGCCGC	aGG	CCTGCACGGCCTGGCTGAGCCGCaGGCGGC	31.59	4	53.11	-	84.33	AGGCGGCCGCGCTGGGCCCCGAG>A	exon									-0.0270341
NM_022454.4:c.499_520del	SOX17	spCas9	spCas9_134	8:54459233-54459256	-	CATGGCCACGCGGCCGCCtG	CGG	GTCCATGGCCACGCGGCCGCCtGCGGCTCA	44.63	2	36.56	-	66.3	AGGCGGCCGCGCTGGGCCCCGAG>A	exon									-0.0818326
NM_022454.4:c.499_520del	SOX17	CasX	CasX_135	8:54459213-54459237	+	TGCACGGCCTGGCTGAGCCG	TTCC	GCGGCTTCCTGCACGGCCTGGCTGAGCCGCaGG	-	3	-	-	-	AGGCGGCCGCGCTGGGCCCCGAG>A	exon
NM_003114.5:c.679G>T	SPAG1	CasX	CasX_136	8:100184690-100184714	+	ACTCAGGAGATTATGAAtAA	TTCA	AAGCTTTCAACTCAGGAGATTATGAAtAAGCAG	-	-2	-	-	-	G>T	exon
NM_003114.5:c.679G>T	SPAG1	Cas12a	Cas12a_137	8:100184689-100184714	+	AACTCAGGAGATTATGAAtAA	TTTC	GAAGCTTTCAACTCAGGAGATTATGAAtAAGCAG	-	1	-	60.06	-	G>T	exon
NM_003114.5:c.2T>G	SPAG1	spCas9	spCas9_138	8:100162261-100162284	+	TTAAATATTGTATTTCAGCT	AgG	CTTTTAAATATTGTATTTCAGCTAgGACCA	44.01	5	9.91	-	62.12	T>G	start_codon									-0.303531
NM_003114.5:c.2T>G	SPAG1	Cas12a	Cas12a_139	8:100162260-100162285	+	AATATTGTATTTCAGCTAgGA	TTTA	TAACTTTTAAATATTGTATTTCAGCTAgGACCAC	-	1	-	12.03	-	T>G	start_codon
NM_003114.5:c.2014C>T	SPAG1	Cas12a	Cas12a_140	8:100233427-100233452	-	CTTCTTCAAACTaGCACAGCT	TTTG	CCTGCTTTGCTTCTTCAAACTaGCACAGCTTCAA	-	-6	-	25.15	-	C>T	exon
NM_003114.5:c.1282_1294del	SPAG1	spCas9	spCas9_141	8:100213244-100213267	+	GAGCCCACGGCGGGCCTCTG	cGG	GCGGAGCCCACGGCGGGCCTCTGcGGCGGC	26.88	4	29.45	-	69.63	CGGCGGCGGCGGCG>C	exon									-0.244731
NM_003114.5:c.1282_1294del	SPAG1	spCas9	spCas9_144	8:100213257-100213280	-	CGGTGGCGCCGCCGCCgCAG	AGG	GCCCGGTGGCGCCGCCGCCgCAGAGGCCCG	33.86	-1	48.32	-	56.16	CGGCGGCGGCGGCG>C	exon									-0.0446576
NM_003114.5:c.1097-11C>G	SPAG1	spCas9	spCas9_145	8:100213075-100213098	-	CCGCGGGCTCTGTGAGGAAc	TGG	GCTCCGCGGGCTCTGTGAGGAAcTGGATGC	40.26	3	56.53	-	83.46	C>G	intron									0.051868
NM_003114.5:c.1097-11C>G	SPAG1	saCas9	saCas9_148	8:100213073-100213100	-	CTCCGCGGGCTCTGTGAGGAA	cTGGAT	CGGCTCCGCGGGCTCTGTGAGGAAcTGGATGCGG	-	4	-	-	80.52	C>G	intron
NM_003114.5:c.1663C>T	SPAG1	saCas9	saCas9_149	8:100220401-100220428	-	TTAACACTGTCATTTGCTAGC	TaGAGT	CTGTTAACACTGTCATTTGCTAGCTaGAGTCCAC	-	5	-	-	72.5	C>T	exon
NM_003114.5:c.557del	SPAG1	CasX	CasX_150	8:100184025-100184049	-	TGTCTCAATTTTAGACAAGT	TTCT	ATCTATTCTTGTCTCAATTTTAGACAAGTGTaC	-	4	-	-	-	TC>T	exon
NM_003114.5:c.2577del	SPAG1	CasX	CasX_151	8:100240670-100240694	+	TTCTCCTCATTCAGTCTCTG	TTCC	ATACATTCCTTCTCCTCATTCAGTCTCTGAAAA	-	6	-	-	-	AT>A	exon
NM_003114.5:c.595+1G>A	SPAG1	spCas9	spCas9_153	8:100184048-100184071	+	GAATAGATACAGCAGaTAAT	TGG	CAAGAATAGATACAGCAGaTAATTGGAGAA	16.79	-2	19.6	-	61.53	G>A	intron									-0.382095
NM_003114.5:c.1785G>A	SPAG1	spCas9	spCas9_154	8:100225254-100225277	+	GCCACTGCAAGCTTGaCATC	CGG	TGTGCCACTGCAAGCTTGaCATCCGGCAAA	53.92	-2	32.15	-	60.41	G>A	exon									-0.0622406
NM_003114.5:c.1785G>A	SPAG1	CasX	CasX_155	8:100225248-100225272	+	GTGCCACTGCAAGCTTGaCA	TTCT	CCTGCTTCTGTGCCACTGCAAGCTTGaCATCCG	-	-2	-	-	-	G>A	exon
NM_003114.5:c.1785G>A	SPAG1	Cas12a	Cas12a_156	8:100225270-100225295	-	AGATCATCTCTTTTGCCGGAT	TTTG	CTTGTTTTGAGATCATCTCTTTTGCCGGATGtCA	-	5	-	24.74	-	G>A	exon
NM_003114.5:c.2089C>T	SPAG1	spCas9	spCas9_157	8:100233498-100233521	+	AGCCTTCTATAGAtGAGCTC	TGG	GAAAGCCTTCTATAGAtGAGCTCTGGCTCA	55.02	-4	58.32	-	73.34	C>T	exon									0.155635
NM_003114.5:c.2089C>T	SPAG1	spCas9	spCas9_158	8:100233499-100233522	-	AGCCAGAGCTCaTCTATAGA	AGG	ATGAGCCAGAGCTCaTCTATAGAAGGCTTT	54.12	-6	61.17	-	67.94	C>T	exon									0.175499
NM_003114.5:c.2089C>T	SPAG1	Cas12a	Cas12a_159	8:100233503-100233528	-	TGAGCCAGAGCTCaTCTATAG	TTTA	AGTCCTTTATGAGCCAGAGCTCaTCTATAGAAGG	-	-5	-	60.37	-	C>T	exon
NM_003114.5:c.1864dup	SPAG1	spCas9	spCas9_160	8:100231149-100231172	-	TAAATGTTTTTTCtcATCTA	TGG	CTTTAAATGTTTTTTCtcATCTATGGGACA	36.88	-3	1.27	-	58.07	G>GA	exon									-0.414933
NM_003114.5:c.1864dup	SPAG1	CasX	CasX_162	8:100231133-100231157	+	TTGTTTTTTTGTCCCATAGA	TTCT	TCCTCTTCTTTGTTTTTTTGTCCCATAGATgaG	-	3	-	-	-	G>GA	exon
NM_003114.5:c.1864dup	SPAG1	CasX	CasX_163	8:100231162-100231186	-	TTAAGGGCTTTAAATGTTTT	TTCC	CCTTCTTCCTTAAGGGCTTTAAATGTTTTTTCt	-	6	-	-	-	G>GA	exon
NM_003114.5:c.1864dup	SPAG1	Cas12a	Cas12a_164	8:100231136-100231161	+	TTTTTTTGTCCCATAGATgaG	TTTG	TCTTCTTTGTTTTTTTGTCCCATAGATgaGAAAA	-	1	-	1.42	-	G>GA	exon
NM_003114.5:c.1864dup	SPAG1	Cas12a	Cas12a_165	8:100231149-100231174	-	AATGTTTTTTCtcATCTATGG	TTTA	AGGGCTTTAAATGTTTTTTCtcATCTATGGGACA	-	-6	-	1.71	-	G>GA	exon
NM_003114.5:c.1113_1149del	SPAG1	spCas9	spCas9_166	8:100213082-100213105	+	CCTCACAGAGCCCGCGGAGC	cGG	CTTCCTCACAGAGCCCGCGGAGCcGGCAAC	39.25	4	44.4	-	79.18	CGGCGGGAGCCGCGCGCGCCGCCCAGCCGTGCGTCATG>C	exon									-0.0525536
NM_003114.5:c.1113_1149del	SPAG1	spCas9	spCas9_167	8:100213100-100213123	-	CAGCTTCTTCTGGATGTTGC	CgG	AGTCAGCTTCTTCTGGATGTTGCCgGCTCC	47.1	5	37.42	-	64.19	CGGCGGGAGCCGCGCGCGCCGCCCAGCCGTGCGTCATG>C	exon									-0.0597276
NM_003114.5:c.1113_1149del	SPAG1	CasX	CasX_170	8:100213080-100213104	+	TCACAGAGCCCGCGGAGCcG	TTCC	TCCACTTCCTCACAGAGCCCGCGGAGCcGGCAA	-	-1	-	-	-	CGGCGGGAGCCGCGCGCGCCGCCCAGCCGTGCGTCATG>C	exon
NM_003114.5:c.1113_1149del	SPAG1	CasX	CasX_171	8:100213095-100213119	-	TCTGGATGTTGCCgGCTCCG	TTCT	TCAGCTTCTTCTGGATGTTGCCgGCTCCGCGGG	-	-6	-	-	-	CGGCGGGAGCCGCGCGCGCCGCCCAGCCGTGCGTCATG>C	exon
NM_003114.5:c.762del	SPAG1	CasX	CasX_172	8:100187169-100187193	-	AGTTCTGTAATTgATTTCTG	TTCC	CACTATTCCAGTTCTGTAATTgATTTCTGCTTG	-	-7	-	-	-	CA>C	exon
NM_003114.5:c.742C>T	SPAG1	spCas9	spCas9_173	8:100187148-100187171	-	TGCTTGAGCTCaATTGTTAT	AGG	TTCTGCTTGAGCTCaATTGTTATAGGCAAC	38.6	-6	10.58	-	58.94	C>T	exon									-0.32855
NM_003114.5:c.742C>T	SPAG1	CasX	CasX_174	8:100187134-100187158	+	CACTGTAGTTGCCTATAACA	TTCC	AGCGCTTCCCACTGTAGTTGCCTATAACAATtG	-	4	-	-	-	C>T	exon
NM_003114.5:c.742C>T	SPAG1	CasX	CasX_175	8:100187164-100187188	-	GTAATTTGATTTCTGCTTGA	TTCT	TCCAGTTCTGTAATTTGATTTCTGCTTGAGCTC	-	6	-	-	-	C>T	exon
NM_003114.5:c.742C>T	SPAG1	Cas12a	Cas12a_176	8:100187155-100187180	-	ATTTCTGCTTGAGCTCaATTG	TTTG	TGTAATTTGATTTCTGCTTGAGCTCaATTGTTAT	-	-2	-	13.28	-	C>T	exon
NM_003114.5:c.2542del	SPAG1	spCas9	spCas9_178	8:100240640-100240663	+	TTTTTAAGTAACAAACTTGA	aGG	ATGTTTTTAAGTAACAAACTTGAaGGGATA	47.5	4	4.31	-	74.19	AG>A	exon									-0.332982
NM_003114.5:c.2542del	SPAG1	saCas9	saCas9_180	8:100240639-100240666	+	GTTTTTAAGTAACAAACTTGA	aGGGAT	GATGTTTTTAAGTAACAAACTTGAaGGGATACAT	-	4	-	-	73.58	AG>A	exon
NM_003114.5:c.2542del	SPAG1	Cas12a	Cas12a_181	8:100240642-100240667	+	AGTAACAAACTTGAaGGGATA	TTTA	ATGTTTTTAAGTAACAAACTTGAaGGGATACATT	-	-4	-	28	-	AG>A	exon
NM_003114.5:c.319A>T	SPAG1	CasX	CasX_182	8:100177809-100177833	+	CAGAGTTGGGTATCAGAAAT	TTCT	CTCTATTCTCAGAGTTGGGTATCAGAAATTtAA	-	3	-	-	-	A>T	exon
NM_003114.5:c.319A>T	SPAG1	Cas12a	Cas12a_183	8:100177826-100177851	-	TCTTCTTCTTTTTaAATTTCT	TTTA	TGCATTTTATCTTCTTCTTTTTaAATTTCTGATA	-	-5	-	1.23	-	A>T	exon
NM_003114.5:c.1285_1294del	SPAG1	spCas9	spCas9_184	8:100213244-100213267	+	GAGCCCACGGCGGGCCTCTG	CGG	GCGGAGCCCACGGCGGGCCTCTGCGGcGGC	26.88	7	29.45	-	70.32	CGGCGGCGGCG>C	exon									-0.244942
NM_003114.5:c.1285_1294del	SPAG1	spCas9	spCas9_188	8:100213257-100213280	-	TGGCGCCGCCGCCgCCGCAG	AGG	CGGTGGCGCCGCCGCCgCCGCAGAGGCCCG	32.33	-4	52	-	51.11	CGGCGGCGGCG>C	exon									-0.0217369
NM_003114.5:c.1024C>T	SPAG1	spCas9	spCas9_189	8:100194177-100194200	+	AGGGAAAAGGATGGTTATTt	AGG	CAAAGGGAAAAGGATGGTTATTtAGGAAAT	21.18	3	20.45	-	77.08	C>T	exon									-0.354274
NM_003114.5:c.1024C>T	SPAG1	CasX	CasX_190	8:100194201-100194225	-	TCATCTTCGGAGTTTTCTAT	TTCT	TTTCCTTCTTCATCTTCGGAGTTTTCTATTTCC	-	7	-	-	-	C>T	exon
NM_003114.5:c.325_326del	SPAG1	CasX	CasX_193	8:100177809-100177833	+	CAGAGTTGGGTATCAGAAAT	TTCT	CTCTATTCTCAGAGTTGGGTATCAGAAATTAAA	-	7	-	-	-	AAG>A	exon
NM_003114.5:c.325_326del	SPAG1	CasX	CasX_194	8:100177840-100177864	-	TGAAAGTGCATTTTATCTTC	TTCA	TCAGTTTCATGAAAGTGCATTTTATCTTCTTtT	-	4	-	-	-	AAG>A	exon
NM_003114.5:c.325_326del	SPAG1	Cas12a	Cas12a_195	8:100177840-100177865	-	ATGAAAGTGCATTTTATCTTC	TTTC	CTCAGTTTCATGAAAGTGCATTTTATCTTCTTtT	-	6	-	2.87	-	AAG>A	exon
NM_003114.5:c.1519dup	SPAG1	Cas12a	Cas12a_196	8:100213900-100213925	-	CCTGTTACAATCTTGAATGtg	TTTA	TGCAGTTTACCTGTTACAATCTTGAATGtgCAGC	-	3	-	52.85	-	C>CA	exon
NM_003114.5:c.2367del	SPAG1	spCas9	spCas9_197	8:100240469-100240492	+	GAGAAGGGAGGCAAAAGCAg	AGG	TCTGAGAAGGGAGGCAAAAGCAgAGGTCAC	57.43	3	52.93	-	65.64	GC>G	exon									0.127649
NM_003114.5:c.2367del	SPAG1	CasX	CasX_198	8:100240465-100240489	+	GAGAAGGGAGGCAAAAGCAg	TTCT	CTTGCTTCTGAGAAGGGAGGCAAAAGCAgAGGT	-	1	-	-	-	GC>G	exon
NM_003114.5:c.2367del	SPAG1	CasX	CasX_199	8:100240487-100240511	-	CAGGGTCTTCTGGTGACCTc	TTCT	GAAGTTTCTCAGGGTCTTCTGGTGACCTcTGCT	-	1	-	-	-	GC>G	exon
NM_003114.5:c.2367del	SPAG1	Cas12a	Cas12a_200	8:100240487-100240512	-	TCAGGGTCTTCTGGTGACCTc	TTTC	GGAAGTTTCTCAGGGTCTTCTGGTGACCTcTGCT	-	3	-	40.26	-	GC>G	exon
NM_003114.5:c.1012del	SPAG1	spCas9	spCas9_201	8:100194157-100194180	+	GCATCTGAGACTCAAACCAA	AGG	GCTGCATCTGAGACTCAAACCAAAGGgAAA	55.7	7	17.55	-	65.92	GA>G	exon									-0.173731
NM_003114.5:c.1012del	SPAG1	spCas9	spCas9_205	8:100194172-100194195	-	GAATAACCATCCTTTcCCTT	TGG	CCTGAATAACCATCCTTTcCCTTTGGTTTG	18.93	-2	15.31	-	64.94	GA>G	exon									-0.405985
NM_003114.5:c.1012del	SPAG1	saCas9	saCas9_206	8:100194161-100194188	+	CTGAGACTCAAACCAAAGGgA	AAGGAT	CATCTGAGACTCAAACCAAAGGgAAAGGATGGTT	-	2	-	-	69.12	GA>G	exon
NM_003114.5:c.1012del	SPAG1	saCas9	saCas9_207	8:100194165-100194192	-	TAACCATCCTTTcCCTTTGGT	TTGAGT	GAATAACCATCCTTTcCCTTTGGTTTGAGTCTCA	-	-6	-	-	61.14	GA>G	exon
NM_003114.5:c.1012del	SPAG1	CasX	CasX_208	8:100194182-100194206	-	ATTTCCTGAATAACCATCCT	TTCT	GAGTTTTCTATTTCCTGAATAACCATCCTTTcC	-	4	-	-	-	GA>G	exon
NM_003114.5:c.1012del	SPAG1	Cas12a	Cas12a_210	8:100194182-100194207	-	TATTTCCTGAATAACCATCCT	TTTC	GGAGTTTTCTATTTCCTGAATAACCATCCTTTcC	-	6	-	29.24	-	GA>G	exon
NM_003114.5:c.1244_1253del	SPAG1	spCas9	spCas9_212	8:100213214-100213237	+	CCAGACCCCGGAGGCCGGCG	CgG	GGGCCAGACCCCGGAGGCCGGCGCgGCCCA	27.8	5	45.88	-	69.29	GGACAAGCGGA>G	exon									-0.104031
NM_003114.5:c.1244_1253del	SPAG1	spCas9	spCas9_216	8:100213227-100213250	-	AGGCCCGCCGTGGGCcGCGC	CGG	CAGAGGCCCGCCGTGGGCcGCGCCGGCCTC	28.3	-2	33.84	-	80.19	GGACAAGCGGA>G	exon									-0.203546
NM_003114.5:c.1584_1606del	SPAG1	spCas9	spCas9_217	8:100220302-100220325	+	CTATGAAACCTCTTCTGAGG	CGg	TCTCTATGAAACCTCTTCTGAGGCGgGCAG	50.4	6	37.07	-	55.61	GGCGATGGCCTATGAAACTCTAGA>G	exon									-0.0407774
NM_003114.5:c.1584_1606del	SPAG1	CasX	CasX_221	8:100220298-100220322	+	CTATGAAACCTCTTCTGAGG	TTCT	ATCCATTCTCTATGAAACCTCTTCTGAGGCGgG	-	4	-	-	-	GGCGATGGCCTATGAAACTCTAGA>G	exon
NM_003114.5:c.324dup	SPAG1	CasX	CasX_222	8:100177809-100177833	+	CAGAGTTGGGTATCAGAAAT	TTCT	CTCTATTCTCAGAGTTGGGTATCAGAAATtaTA	-	2	-	-	-	T>TA	exon
NM_003114.5:c.324dup	SPAG1	Cas12a	Cas12a_223	8:100177828-100177853	-	TCTTCTTCTTTTTTAtaATTT	TTTA	TGCATTTTATCTTCTTCTTTTTTAtaATTTCTGA	-	-2	-	1.19	-	T>TA	exon
NM_003114.5:c.1687_1688del	SPAG1	Cas12a	Cas12a_224	8:100220431-100220456	-	GGTAGCTGCCTCAGATTAATT	TTTA	TAGATTTTAGGTAGCTGCCTCAGATTAATTACgT	-	6	-	47.51	-	CAG>C	exon
NM_003114.5:c.1156C>T	SPAG1	CasX	CasX_225	8:100213151-100213175	-	GCTTTGCCAGTCAGCTTCTT	TTCG	CCGCCTTCGGCTTTGCCAGTCAGCTTCTTCTaG	-	4	-	-	-	C>T	exon
NM_003114.5:c.1156C>T	SPAG1	Cas12a	Cas12a_226	8:100213144-100213169	-	CCAGTCAGCTTCTTCTaGATG	TTTG	TCGGCTTTGCCAGTCAGCTTCTTCTaGATGTTGC	-	-2	-	59.17	-	C>T	exon
NM_003114.5:c.2085_2086del	SPAG1	spCas9	spCas9_227	8:100233499-100233522	-	TGAGCCAGAGCTCGTCTAgA	AGG	TTATGAGCCAGAGCTCGTCTAgAAGGCTTT	49.54	2	48.54	-	58.9	CTA>C	exon									0.0476242
NM_003114.5:c.2085_2086del	SPAG1	Cas12a	Cas12a_228	8:100233501-100233526	-	TGAGCCAGAGCTCGTCTAgAA	TTTA	AGTCCTTTATGAGCCAGAGCTCGTCTAgAAGGCT	-	1	-	50.26	-	CTA>C	exon
NM_003114.5:c.1119del	SPAG1	spCas9	spCas9_229	8:100213100-100213123	-	GGCGGCGCGCGCGcTCCCGC	CGG	CTGGGCGGCGCGCGCGcTCCCGCCGGCTCC	32.88	-4	20.85	-	62.71	GC>G	exon									-0.278472
NM_003114.5:c.311C>A	SPAG1	CasX	CasX_230	8:100177802-100177826	+	CTATTCTCAGAGTTGGGTAT	TTCT	CCCTTTTCTCTATTCTCAGAGTTGGGTATaAGA	-	2	-	-	-	C>A	exon
NM_003114.5:c.311C>A	SPAG1	CasX	CasX_232	8:100177821-100177845	-	TCTTTTTTAATTTCTtATAC	TTCT	TTATCTTCTTCTTTTTTAATTTCTtATACCCAA	-	-4	-	-	-	C>A	exon
NM_003114.5:c.311C>A	SPAG1	Cas12a	Cas12a_234	8:100177801-100177826	+	TCTATTCTCAGAGTTGGGTAT	TTTC	ACCCTTTTCTCTATTCTCAGAGTTGGGTATaAGA	-	4	-	28.41	-	C>A	exon
NM_003114.5:c.311C>A	SPAG1	Cas12a	Cas12a_235	8:100177826-100177851	-	TCTTCTTCTTTTTTAATTTCT	TTTA	TGCATTTTATCTTCTTCTTTTTTAATTTCTtATA	-	4	-	1.16	-	C>A	exon
NM_003114.5:c.600_603del	SPAG1	spCas9	spCas9_236	8:100184606-100184629	+	AGCAGATAACATTTATTTCT	AGG	TATAGCAGATAACATTTATTTCTAGGtCTG	36.43	7	8.76	-	70.12	TCTAA>T	exon									-0.359574
NM_001080394.4:c.2265del	SPIDR	Cas12a	Cas12a_237	8:47713538-47713563	+	AGTGTGGTCTCTGGTGCAAGT	TTTG	CCCCTTTTGAGTGTGGTCTCTGGTGCAAGTtCTG	-	4	-	40.77	-	TC>T	exon
NM_001080394.4:c.776+1G>T	SPIDR	CasX	CasX_238	8:47396603-47396627	+	GCAAAGAAGAAGCTTTTAAG	TTCA	GAAAATTCAGCAAAGAAGAAGCTTTTAAGtTTA	-	2	-	-	-	G>T	intron
NM_001080394.4:c.776+1G>T	SPIDR	Cas12a	Cas12a_239	8:47396622-47396647	-	AAAGGGTATAATTTAAaCTTA	TTTA	GAGTATTTAAAAGGGTATAATTTAAaCTTAAAAG	-	-2	-	40.63	-	G>T	intron
NM_001080394.4:c.839G>A	SPIDR	Cas12a	Cas12a_240	8:47407924-47407949	-	GTAAGAAATACATTGATGTCT	TTTG	TGTCTTTTGGTAAGAAATACATTGATGTCTCtAC	-	5	-	45.52	-	G>A	exon
NM_000349.3:c.94dup	STAR	spCas9	spCas9_241	8:38148701-38148724	+	GGGCCCTCCGGTTCAGCTCC	TGG	CCAGGGCCCTCCGGTTCAGCTCCTGGctCT	36.74	7	45.51	-	65.53	G>GA	exon									-0.0538726
NM_000349.3:c.94dup	STAR	spCas9	spCas9_243	8:38148718-38148741	-	CTGTGATGGCCATCAGagCC	AGG	AGGCTGTGATGGCCATCAGagCCAGGAGCT	59.56	1	64.04	-	75.93	G>GA	exon									0.228365
NM_000349.3:c.173_177del	STAR	spCas9	spCas9_244	8:38148639-38148662	-	AGGTTCGGCGGCGGAGCTCT	CgG	ACCAGGTTCGGCGGCGGAGCTCTCgGTAAG	43.38	5	32.17	-	45.67	GCTCAT>G	exon									-0.118959
NM_000349.3:c.173_177del	STAR	CasX	CasX_245	8:38148635-38148659	-	GCGGCGGAGCTCTCgGTAAG	TTCG	CCAGGTTCGGCGGCGGAGCTCTCgGTAAGTGCT	-	-5	-	-	-	GCTCAT>G	exon
NM_000349.3:c.178+2dup	STAR	spCas9	spCas9_246	8:38148627-38148650	-	TCTACTCGGTAtaAGTGCTG	AGG	CTCTCTACTCGGTAtaAGTGCTGAGGCTTC	61.38	-5	55.21	-	66.03	A>AT	intron									0.169299
NM_000349.3:c.178+2dup	STAR	saCas9	saCas9_247	8:38148621-38148648	+	CCAGAAGCCTCAGCACTtaTA	CCGAGT	AGCCCAGAAGCCTCAGCACTtaTACCGAGTAGAG	-	-1	-	-	66.67	A>AT	intron
NM_000349.3:c.178+2dup	STAR	CasX	CasX_248	8:38148642-38148666	-	GCGGCGGAGCTCTCTACTCG	TTCG	CCAGGTTCGGCGGCGGAGCTCTCTACTCGGTAt	-	6	-	-	-	A>AT	intron
NM_000349.3:c.749G>A	STAR	CasX	CasX_249	8:38144383-38144407	-	CCTACCTCCTACTGCAGGGG	TTCT	CCAAATTCTCCTACCTCCTACTGCAGGGGTaGC	-	3	-	-	-	G>A	exon
NM_000349.3:c.472C>T	STAR	spCas9	spCas9_250	8:38146123-38146146	+	TATCTTTTCCGATCTTCTaC	AGG	ATGTATCTTTTCCGATCTTCTaCAGGACCT	55.49	2	43.67	-	76.97	C>T	exon									0.0366781
NM_000349.3:c.472C>T	STAR	spCas9	spCas9_251	8:38146130-38146153	-	TGGTAGGTCCTGtAGAAGAT	CGG	GCCTGGTAGGTCCTGtAGAAGATCGGAAAA	48.42	-5	56.39	-	54.61	C>T	exon									0.107025
NM_000349.3:c.472C>T	STAR	CasX	CasX_252	8:38146141-38146165	-	CCATGGCCTGGTAGGTCCTG	TTCC	TCTGGTTCCCCATGGCCTGGTAGGTCCTGtAGA	-	2	-	-	-	C>T	exon
NM_000349.3:c.577C>T	STAR	spCas9	spCas9_253	8:38146022-38146045	+	ACAGGTGGAGCCTCaGCGCT	TGG	CACACAGGTGGAGCCTCaGCGCTTGGCACA	45.67	-3	60.44	-	56.37	C>T	exon									0.123811
NM_000349.3:c.577C>T	STAR	spCas9	spCas9_254	8:38146031-38146054	-	GTGCGCTGTGCCAAGCGCtG	AGG	AGCGTGCGCTGTGCCAAGCGCtGAGGCTCC	50.51	2	58.81	-	60.88	C>T	exon									0.137204
NM_000349.3:c.577C>T	STAR	Cas12a	Cas12a_255	8:38146038-38146063	-	TGAGCGTGCGCTGTGCCAAGC	TTTG	GTGACTTTGTGAGCGTGCGCTGTGCCAAGCGCtG	-	6	-	51.7	-	C>T	exon
NM_000349.3:c.402T>A	STAR	CasX	CasX_256	8:38146328-38146352	+	ATGCGCTCCACGAGCTCTTC	TTCC	ATTGCTTCCATGCGCTCCACGAGCTCTTCtTAG	-	2	-	-	-	T>A	exon
NM_000349.3:c.650G>C	STAR	spCas9	spCas9_257	8:38145953-38145976	-	AAGGGTGTCATCAcGTAATA	CGG	CAGAAGGGTGTCATCAcGTAATACGGGCAG	53.56	-4	45.19	-	57.47	G>C	exon									0.0438942
NM_000349.3:c.650G>C	STAR	Cas12a	Cas12a_259	8:38145939-38145964	+	GAGCCTGCTGCCCGTATTACg	TTTG	GGGGGTTTGGAGCCTGCTGCCCGTATTACgTGAT	-	3	-	73.48	-	G>C	exon
NM_000349.3:c.661G>A	STAR	CasX	CasX_260	8:38145306-38145330	-	CCATTTGCCAGGGCGGAGCA	TTCT	TTGACTTCTCCATTTGCCAGGGCGGAGCACaGT	-	3	-	-	-	G>A	exon
NM_000349.3:c.661G>A	STAR	Cas12a	Cas12a_261	8:38145298-38145323	-	CCAGGGCGGAGCACaGTCCCA	TTTG	CTCCATTTGCCAGGGCGGAGCACaGTCCCACTTG	-	-4	-	60.93	-	G>A	exon
NM_000349.3:c.707_708delinsCTT	STAR	spCas9	spCas9_262	8:38145246-38145269	+	CGTAAGTTTGGTaagCTTAG	AGG	CCACGTAAGTTTGGTaagCTTAGAGGGACT	42.98	-5	12.27	-	70.34	GA>TTC	exon									-0.292608
NM_000349.3:c.201_202del	STAR	spCas9	spCas9_264	8:38148291-38148314	-	GAAGAGACTCTaCAGTGACC	AGG	CTGGAAGAGACTCTaCAGTGACCAGGAGCT	64.53	-6	61.94	-	69.33	ATC>A	exon									0.242032
NM_000349.3:c.201_202del	STAR	saCas9	saCas9_265	8:38148282-38148309	+	TAGGCCAGCTCCTGGTCACTG	tAGAGT	AGATAGGCCAGCTCCTGGTCACTGtAGAGTCTCT	-	4	-	-	51.66	ATC>A	exon
NM_000349.3:c.201_202del	STAR	CasX	CasX_266	8:38148300-38148324	-	CGGCTGGAAGAGACTCTaCA	TTCT	CCAGGTTCTCGGCTGGAAGAGACTCTaCAGTGA	-	-2	-	-	-	ATC>A	exon
NM_000349.3:c.824T>C	STAR	spCas9	spCas9_267	8:38144286-38144309	+	TCAGAGGCAGGGTGGGACTC	CgG	GCTTCAGAGGCAGGGTGGGACTCCgGGCGC	40.13	5	46.81	-	80.7	T>C	exon									-0.0280553
NM_000349.3:c.824T>C	STAR	spCas9	spCas9_269	8:38144304-38144327	-	CAACCACCTGCGCAAGCGCC	cGG	TGCCAACCACCTGCGCAAGCGCCcGGAGTC	43.35	4	46.05	-	60.65	T>C	exon									-0.00944983
NM_000349.3:c.824T>C	STAR	saCas9	saCas9_270	8:38144301-38144328	-	CCAACCACCTGCGCAAGCGCC	cGGAGT	TTGCCAACCACCTGCGCAAGCGCCcGGAGTCCCA	-	4	-	-	61.73	T>C	exon
NM_000349.3:c.824T>C	STAR	CasX	CasX_271	8:38144285-38144309	+	GAGGCAGGGTGGGACTCCgG	TTCA	CTGGCTTCAGAGGCAGGGTGGGACTCCgGGCGC	-	-1	-	-	-	T>C	exon
NM_000349.3:c.824T>C	STAR	Cas12a	Cas12a_272	8:38144307-38144332	-	CCAACCACCTGCGCAAGCGCC	TTTG	TGGATTTTGCCAACCACCTGCGCAAGCGCCcGGA	-	4	-	53.3	-	T>C	exon
NM_000349.3:c.306+1del	STAR	spCas9	spCas9_273	8:38148188-38148211	-	GGAGAGTCAGCAGtAAGTGT	CGG	GAAGGAGAGTCAGCAGtAAGTGTCGGGGAG	40.2	-4	57.13	-	66.39	TG>T	intron									0.0616599
NM_000349.3:c.73dup	STAR	spCas9	spCas9_276	8:38148739-38148762	-	CTGCAGGGCTGAGGCAcaAC	AGG	CTTCTGCAGGGCTGAGGCAcaACAGGCTGT	63.05	1	78.9	-	60.04	A>AC	exon									0.375847
NM_000349.3:c.73dup	STAR	CasX	CasX_277	8:38148745-38148769	-	CTTCTGCAGGGCTGAGGCAc	TTCC	GGTTATTCCCTTCTGCAGGGCTGAGGCAcaACA	-	2	-	-	-	A>AC	exon
NM_000349.3:c.401_402del	STAR	spCas9	spCas9_279	8:38146338-38146361	-	GAGAGGCTCTgAAGAGCTCG	TGG	ATGGAGAGGCTCTgAAGAGCTCGTGGAGCG	64.98	-7	64.42	-	85.84	GTA>G	exon									0.260034
NM_000349.3:c.401_402del	STAR	CasX	CasX_280	8:38146328-38146352	+	ATGCGCTCCACGAGCTCTTc	TTCC	ATTGCTTCCATGCGCTCCACGAGCTCTTcAGAG	-	1	-	-	-	GTA>G	exon
NM_000349.3:c.42C>A	STAR	spCas9	spCas9_281	8:38150759-38150782	+	CATGTTGCGCATGTGTCTtT	AGG	CTTCATGTTGCGCATGTGTCTtTAGGAGCT	25.91	2	5.44	-	62.79	C>A	exon									-0.445927
NM_000349.3:c.42C>A	STAR	CasX	CasX_282	8:38150757-38150781	+	TGTTGCGCATGTGTCTtTAG	TTCA	CACCCTTCATGTTGCGCATGTGTCTtTAGGAGC	-	-3	-	-	-	C>A	exon
NM_000349.3:c.42C>A	STAR	CasX	CasX_283	8:38150779-38150803	-	AGCTGTGCGCTGGGAGCTCC	TTCA	CGACATTCAAGCTGTGCGCTGGGAGCTCCTAaA	-	4	-	-	-	C>A	exon
NM_000349.3:c.129del	STAR	spCas9	spCas9_284	8:38148666-38148689	+	CTGGTTAATCCACGTGCTAG	GGG	AACCTGGTTAATCCACGTGCTAGGGGtGGG	62.09	7	57.01	-	75.12	AC>A	exon									0.185479
NM_000349.3:c.465+2T>C	STAR	spCas9	spCas9_288	8:38146287-38146310	-	CCCCAATGTCAAGGAGATCA	AGG	GAACCCCAATGTCAAGGAGATCAAGGcGAG	53.79	7	64.68	-	49.06	T>C	intron									0.208223
NM_000349.3:c.637A>T	STAR	spCas9	spCas9_289	8:38145963-38145986	+	CTGATGACACCCTaCTGCTC	AGG	TACCTGATGACACCCTaCTGCTCAGGCATG	57.55	-4	59.9	-	56.5	A>T	exon									0.188505
NM_000349.3:c.637A>T	STAR	spCas9	spCas9_290	8:38145972-38145995	-	CGGGAACATGCCTGAGCAGt	AGG	CTTCGGGAACATGCCTGAGCAGtAGGGTGT	57.89	3	57.14	-	68.23	A>T	exon									0.164192
NM_000349.3:c.637A>T	STAR	saCas9	saCas9_292	8:38145970-38145997	-	TTCGGGAACATGCCTGAGCAG	tAGGGT	GACTTCGGGAACATGCCTGAGCAGtAGGGTGTCA	-	4	-	-	67.38	A>T	exon
NM_000349.3:c.637A>T	STAR	CasX	CasX_293	8:38145973-38145997	-	GGAACATGCCTGAGCAGtAG	TTCG	CAGACTTCGGGAACATGCCTGAGCAGtAGGGTG	-	-2	-	-	-	A>T	exon
NM_000349.3:c.60dup	STAR	spCas9	spCas9_294	8:38150754-38150777	-	GACACATGCGCAACATGAga	AGG	ACAGACACATGCGCAACATGAgaAGGGTGA	63.94	3	56.28	-	48.94	A>AG	exon									0.198222
NM_000349.3:c.60dup	STAR	saCas9	saCas9_296	8:38150752-38150779	-	CAGACACATGCGCAACATGAg	aAGGGT	CTACAGACACATGCGCAACATGAgaAGGGTGAGC	-	4	-	-	43.22	A>AG	exon
NM_000349.3:c.60dup	STAR	CasX	CasX_297	8:38150739-38150763	+	CGCAGCGCTCACCCTtcTCA	TTCC	CCTCCTTCCCGCAGCGCTCACCCTtcTCATGTT	-	-4	-	-	-	A>AG	exon
NM_000349.3:c.505G>A	STAR	spCas9	spCas9_298	8:38146101-38146124	-	TACATTCATTACTCACaAGC	TGG	AGATACATTCATTACTCACaAGCTGGCTGC	64.45	-1	60.5	-	61.73	G>A	exon									0.232029
NM_000349.3:c.505G>A	STAR	saCas9	saCas9_299	8:38146088-38146115	+	TGCTGCCTCGGCAGCCAGCTt	GTGAGT	TCCTGCTGCCTCGGCAGCCAGCTtGTGAGTAATG	-	3	-	-	52.59	G>A	exon
NM_000349.3:c.505G>A	STAR	CasX	CasX_301	8:38146084-38146108	+	TGCTGCCTCGGCAGCCAGCT	TTCC	CAGGTTTCCTGCTGCCTCGGCAGCCAGCTtGTG	-	2	-	-	-	G>A	exon
NM_000349.3:c.505G>A	STAR	Cas12a	Cas12a_302	8:38146083-38146108	+	CTGCTGCCTCGGCAGCCAGCT	TTTC	CCAGGTTTCCTGCTGCCTCGGCAGCCAGCTtGTG	-	4	-	34.74	-	G>A	exon
NM_000349.3:c.545G>T	STAR	spCas9	spCas9_303	8:38146048-38146071	+	AGCGCACGCTCACAAAGTCA	aGG	CACAGCGCACGCTCACAAAGTCAaGGGGCC	57.43	4	38.9	-	63.98	G>T	exon									0.0126711
NM_000349.3:c.772C>T	STAR	spCas9	spCas9_306	8:38144355-38144378	-	GCCCAAGAGCATCATCAACt	AGG	GCTGCCCAAGAGCATCATCAACtAGGTCCT	51.06	3	59.85	-	55.48	C>T	exon									0.150613
NM_000349.3:c.125dup	STAR	spCas9	spCas9_307	8:38148670-38148693	+	TTAATCCACGTGCTAGGGGT	GGG	TGGTTAATCCACGTGCTAGGGGTGGGgcGC	46.93	7	41.46	-	67.95	C>CG	exon									-0.0286094
NM_000349.3:c.64+1G>T	STAR	spCas9	spCas9_311	8:38150754-38150777	-	CAGACACATGCGCAACATGA	AGG	CTACAGACACATGCGCAACATGAAGGtTGA	58.05	7	39.44	-	57.86	G>T	exon									0.0225915
NM_000349.3:c.298_299del	STAR	spCas9	spCas9_313	8:38148198-38148221	-	GGCTGGAAGAAGGAGtCAGC	AGG	GAGGGCTGGAAGAAGGAGtCAGCAGGTAAG	60.12	-2	67.66	-	66.95	TGA>T	exon									0.26416
NM_000349.3:c.298_299del	STAR	CasX	CasX_314	8:38148183-38148207	+	CCCCGACACTTACCTGCTGa	TTCT	CAGGCTTCTCCCCGACACTTACCTGCTGaCTCC	-	1	-	-	-	TGA>T	exon
NM_000349.3:c.701_702dup	STAR	spCas9	spCas9_315	8:38145243-38145266	+	CCACGTAAGTTTGGTCTTAG	agg	TAGCCACGTAAGTTTGGTCTTAGaggAGGG	40.61	4	10.4	-	79	T>TCC	exon									-0.324441
NM_000349.3:c.701_702dup	STAR	CasX	CasX_318	8:38145265-38145289	-	CCCGTTGGCTGGAAGTCCCT	TTCA	GGTGCTTCACCCGTTGGCTGGAAGTCCCTcctC	-	4	-	-	-	T>TCC	exon
NM_000349.3:c.407del	STAR	spCas9	spCas9_319	8:38146345-38146368	-	CCCATGGAGAGGCTCTATGA	AGg	CAGCCCATGGAGAGGCTCTATGAAGgCTCG	53.98	6	70.94	-	79.06	GA>G	exon									0.251714
NM_000349.3:c.407del	STAR	CasX	CasX_321	8:38146328-38146352	+	ATGCGCTCCACGAGcCTTCA	TTCC	ATTGCTTCCATGCGCTCCACGAGcCTTCATAGA	-	-5	-	-	-	GA>G	exon
NM_000349.3:c.677del	STAR	spCas9	spCas9_322	8:38145278-38145301	+	ACGGGTGAAGcCCATGCAAG	TGG	CCAACGGGTGAAGcCCATGCAAGTGGGACC	59.43	-7	44.86	-	65.65	GT>G	exon									0.0728663
NM_000349.3:c.677del	STAR	spCas9	spCas9_323	8:38145288-38145311	-	GGAGCACGGTCCCACTTGCA	TGG	GGCGGAGCACGGTCCCACTTGCATGGgCTT	52.09	7	49.56	-	69.85	GT>G	exon									0.0675316
NM_000349.3:c.677del	STAR	CasX	CasX_325	8:38145269-38145293	+	AGCCAACGGGTGAAGcCCAT	TTCC	GGGACTTCCAGCCAACGGGTGAAGcCCATGCAA	-	-4	-	-	-	GT>G	exon
NM_000349.3:c.811del	STAR	spCas9	spCas9_326	8:38144301-38144324	+	GACTCCAGGCGCTTGCGCaG	TGG	TGGGACTCCAGGCGCTTGCGCaGTGGTTGG	44.56	2	26.71	-	69.58	TC>T	exon									-0.164317
NM_000349.3:c.544C>T	STAR	spCas9	spCas9_328	8:38146049-38146072	+	GCGCACGCTCACAAAGTCAC	aGG	ACAGCGCACGCTCACAAAGTCACaGGGCCC	62.13	4	37.33	-	64.22	C>T	exon									0.0270434
NM_000349.3:c.629_630del	STAR	spCas9	spCas9_330	8:38145972-38145995	-	TTCGGGAACATGCgAGCAGA	AGG	GACTTCGGGAACATGCgAGCAGAAGGGTGT	69.87	-4	46.7	-	74.48	GTC>G	exon									0.146114
NM_000349.3:c.629_630del	STAR	saCas9	saCas9_332	8:38145970-38145997	-	ACTTCGGGAACATGCgAGCAG	AAGGGT	CAGACTTCGGGAACATGCgAGCAGAAGGGTGTCA	-	-3	-	-	68.26	GTC>G	exon
NM_000349.3:c.545G>A	STAR	spCas9	spCas9_333	8:38146048-38146071	+	AGCGCACGCTCACAAAGTCA	tGG	CACAGCGCACGCTCACAAAGTCAtGGGGCC	52.04	4	33.45	-	62.98	G>A	exon									-0.0632707
NM_000349.3:c.135del	STAR	spCas9	spCas9_336	8:38148663-38148686	+	AACCTGGTTAATCCACGTGC	tGG	CCGAACCTGGTTAATCCACGTGCtGGGGTG	47.95	4	58.42	-	68.01	AT>A	exon									0.116913
NM_000349.3:c.135del	STAR	spCas9	spCas9_342	8:38148674-38148697	-	GGGGGCCCCACCCCaGCACG	TGG	CTGGGGGGCCCCACCCCaGCACGTGGATTA	62.85	-3	55.22	-	68.66	AT>A	exon									0.177139
NM_000349.3:c.135del	STAR	saCas9	saCas9_343	8:38148662-38148689	+	GAACCTGGTTAATCCACGTGC	tGGGGT	GCCGAACCTGGTTAATCCACGTGCtGGGGTGGGG	-	4	-	-	66.43	AT>A	exon
NM_000349.3:c.135del	STAR	saCas9	saCas9_344	8:38148672-38148699	-	TGGGGGGCCCCACCCCaGCAC	GTGGAT	CCCTGGGGGGCCCCACCCCaGCACGTGGATTAAC	-	-2	-	-	71.78	AT>A	exon
NM_015160.3:c.1066G>A	PMPCA	spCas9	spCas9_0	9:136418614-136418637	+	CTCGGCTGGTGGGCCCaGCA	AGG	CTTCTCGGCTGGTGGGCCCaGCAAGGGCAT	43.94	-1	58.55	-	63.65	G>A	exon									0.0959617
NM_015160.3:c.1066G>A	PMPCA	spCas9	spCas9_2	9:136418627-136418650	-	CCTGGAGAACATGCCCTTGC	tGG	GAGCCTGGAGAACATGCCCTTGCtGGGCCC	46.69	4	30.91	-	59.66	G>A	exon									-0.11432
NM_015160.3:c.1066G>A	PMPCA	CasX	CasX_4	9:136418612-136418636	+	CGGCTGGTGGGCCCaGCAAG	TTCT	GCTCCTTCTCGGCTGGTGGGCCCaGCAAGGGCA	-	-5	-	-	-	G>A	exon
NM_015160.3:c.1543G>A	PMPCA	spCas9	spCas9_5	9:136423209-136423232	+	CCGCCCTGTCGAGTAAGGAC	aGG	AGACCGCCCTGTCGAGTAAGGACaGGCGCC	53.04	4	57.18	-	63.73	G>A	exon									0.137651
NM_015160.3:c.1221del	PMPCA	spCas9	spCas9_6	9:136419051-136419074	+	AAATGGTAGAAAtATCACAA	AGG	GAGAAATGGTAGAAAtATCACAAAGGAGTT	47.18	-5	42.21	-	67.12	TC>T	exon									-0.0207272
NM_015160.3:c.1221del	PMPCA	saCas9	saCas9_7	9:136419050-136419077	+	GAAATGGTAGAAAtATCACAA	AGGAGT	CGAGAAATGGTAGAAAtATCACAAAGGAGTTTAT	-	-5	-	-	66.92	TC>T	exon
NM_015160.3:c.1221del	PMPCA	CasX	CasX_8	9:136419034-136419058	+	TCGCAGGTTCGAGAAATGGT	TTCT	TGCCCTTCTTCGCAGGTTCGAGAAATGGTAGAA	-	7	-	-	-	TC>T	exon
NM_015160.3:c.554G>A	PMPCA	spCas9	spCas9_11	9:136416295-136416318	+	AGAAGTCGAGATGACGCaGA	TGG	TGAAGAAGTCGAGATGACGCaGATGGCGGT	49.18	1	48.35	-	71.09	G>A	exon									0.0402487
NM_015160.3:c.1408+1G>A	PMPCA	spCas9	spCas9_13	9:136421974-136421997	-	CACTACCCCTGCGGTACTCA	tGG	CCTCACTACCCCTGCGGTACTCAtGGATGA	52.1	4	69.3	-	73.74	G>A	intron									0.228889
NM_015160.3:c.1408+1G>A	PMPCA	saCas9	saCas9_14	9:136421956-136421983	+	ACGAGCTGTGCACGCTCATCC	aTGAGT	CGCACGAGCTGTGCACGCTCATCCaTGAGTACCG	-	4	-	-	57.99	G>A	intron
NM_015160.3:c.1408+1G>A	PMPCA	saCas9	saCas9_15	9:136421972-136421999	-	CTCACTACCCCTGCGGTACTC	AtGGAT	CCCCTCACTACCCCTGCGGTACTCAtGGATGAGC	-	5	-	-	69.1	G>A	intron
NM_015160.3:c.64C>T	PMPCA	spCas9	spCas9_16	9:136410712-136410735	+	CGGGTTCTTGGGGCTGTTCG	tGG	GCTCGGGTTCTTGGGGCTGTTCGtGGCTGA	45.39	4	45.25	-	61.82	C>T	exon									-0.00451231
NM_015160.3:c.64C>T	PMPCA	CasX	CasX_18	9:136410716-136410740	+	TGGGGCTGTTCGtGGCTGAG	TTCT	TCGGGTTCTTGGGGCTGTTCGtGGCTGAGGTGA	-	-7	-	-	-	C>T	exon
NM_015160.3:c.64C>T	PMPCA	CasX	CasX_19	9:136410731-136410755	-	CCTTTGGCTCACCTCAGCCa	TTCG	CCTGGTTCGCCTTTGGCTCACCTCAGCCaCGAA	-	1	-	-	-	C>T	exon
NM_015160.3:c.64C>T	PMPCA	Cas12a	Cas12a_20	9:136410724-136410749	-	GCTCACCTCAGCCaCGAACAG	TTTG	TCGCCTTTGGCTCACCTCAGCCaCGAACAGCCCC	-	-5	-	70.89	-	C>T	exon
NM_015160.3:c.100del	PMPCA	spCas9	spCas9_21	9:136412009-136412032	+	TGCGTACAGACGGTTtGTAG	TGG	TCCTGCGTACAGACGGTTtGTAGTGGTGGT	46.17	-2	42.1	-	76.07	TA>T	exon									-0.0302418
NM_015160.3:c.100del	PMPCA	Cas12a	Cas12a_23	9:136411998-136412023	+	GACCTCCTGCGTACAGACGGT	TTTG	TTAGGTTTGGACCTCCTGCGTACAGACGGTTtGT	-	5	-	81.73	-	TA>T	exon
NM_001077365.2:c.2040_2050del	POMT1	spCas9	spCas9_24	9:131522944-131522967	+	GAGGAGCATCTTCAGCGcCC	TGG	CCAGAGGAGCATCTTCAGCGcCCTGGTACT	43.2	1	53.3	-	46.75	CCCTGGTGGTGG>C	exon									0.0535895
NM_001077365.2:c.2040_2050del	POMT1	spCas9	spCas9_25	9:131522961-131522984	-	GTGGCACGCGGAGGAGTACC	AGG	CACGTGGCACGCGGAGGAGTACCAGGgCGC	63.77	7	68.84	-	61.21	CCCTGGTGGTGG>C	exon									0.296876
NM_001077365.2:c.1667del	POMT1	spCas9	spCas9_27	9:131520158-131520181	-	GGTGCAGCCAGTAGGCAATA	TgG	TGGGGTGCAGCCAGTAGGCAATATgGTGTC	30.44	5	33.63	-	77.93	CA>C	exon									-0.192124
NM_001077365.2:c.1667del	POMT1	saCas9	saCas9_30	9:131520148-131520175	-	GCCAGTAGGCAATATgGTGTC	CAGGGT	GCAGCCAGTAGGCAATATgGTGTCCAGGGTGACC	-	-3	-	-	76.1	CA>C	exon
NM_001077365.2:c.1951C>T	POMT1	spCas9	spCas9_31	9:131522166-131522189	-	AGGGAGCAGAAGGATTTaGA	AGG	CACAGGGAGCAGAAGGATTTaGAAGGTGAG	49.17	1	44.24	-	55.59	C>T	exon									0.0110842
NM_001077365.2:c.1951C>T	POMT1	saCas9	saCas9_32	9:131522161-131522188	-	GGGAGCAGAAGGATTTaGAAG	GTGAGT	ACAGGGAGCAGAAGGATTTaGAAGGTGAGTGCGG	-	-2	-	-	60.2	C>T	exon
NM_001077365.2:c.529C>T	POMT1	spCas9	spCas9_33	9:131509001-131509024	+	TCTTCAACTGCtAAAAGCAC	AGG	AGTTCTTCAACTGCtAAAAGCACAGGTATG	60.3	-6	46.83	-	48.21	C>T	exon									0.0994633
NM_001077365.2:c.529C>T	POMT1	CasX	CasX_34	9:131509006-131509030	-	ATACCTGTGCTTTTaGCAGT	TTCC	CCATTTTCCATACCTGTGCTTTTaGCAGTTGAA	-	-5	-	-	-	C>T	exon
NM_001077365.2:c.529C>T	POMT1	Cas12a	Cas12a_35	9:131509006-131509031	-	CATACCTGTGCTTTTaGCAGT	TTTC	TCCATTTTCCATACCTGTGCTTTTaGCAGTTGAA	-	-3	-	20.59	-	C>T	exon
NM_001077365.2:c.1272+1G>A	POMT1	spCas9	spCas9_36	9:131515510-131515533	+	CCTCTGGAGACTGaTGAGTA	AGG	GAACCTCTGGAGACTGaTGAGTAAGGCTGC	50.52	-4	45.22	-	62.1	G>A	intron									0.0250279
NM_001077365.2:c.1272+1G>A	POMT1	saCas9	saCas9_37	9:131515502-131515529	+	GCCCAGAACCTCTGGAGACTG	aTGAGT	CCCGCCCAGAACCTCTGGAGACTGaTGAGTAAGG	-	4	-	-	53.24	G>A	intron
NM_001077365.2:c.93del	POMT1	spCas9	spCas9_38	9:131504291-131504314	+	ATGGGGTTACTGAGCCGGCt	TGG	GGGATGGGGTTACTGAGCCGGCtTGGCGAC	28.27	3	51.03	-	60.04	TG>T	5utr									-0.0560846
NM_001077365.2:c.93del	POMT1	spCas9	spCas9_39	9:131504304-131504327	-	GGGTAGGTGAGTCGCCAaGC	CGG	CGCGGGTAGGTGAGTCGCCAaGCCGGCTCA	55.61	1	48.34	-	63.89	TG>T	5utr									0.0798032
NM_001077365.2:c.1391G>C	POMT1	spCas9	spCas9_40	9:131518842-131518865	+	CGGGGCTCACCTCCCTGACT	cGG	GAGCGGGGCTCACCTCCCTGACTcGGGGTA	41.91	4	48.63	-	61.52	G>C	exon									0.00313632
NM_001077365.2:c.1391G>C	POMT1	spCas9	spCas9_44	9:131518854-131518877	-	AGTTGCCGATACCCCgAGTC	AGG	TCCAGTTGCCGATACCCCgAGTCAGGGAGG	61.75	-2	62.34	-	66.55	G>C	exon									0.229983
NM_001077365.2:c.1391G>C	POMT1	saCas9	saCas9_47	9:131518841-131518868	+	GCGGGGCTCACCTCCCTGACT	cGGGGT	TGAGCGGGGCTCACCTCCCTGACTcGGGGTATCG	-	4	-	-	60.41	G>C	exon
NM_001077365.2:c.1391G>C	POMT1	saCas9	saCas9_48	9:131518858-131518885	-	CGATCTCCAGTTGCCGATACC	CCgAGT	CGACGATCTCCAGTTGCCGATACCCCgAGTCAGG	-	6	-	-	69.28	G>C	exon
NM_001077365.2:c.385del	POMT1	spCas9	spCas9_49	9:131507464-131507487	-	ATGGCGGCACAATGAGAAAg	TGG	CCCATGGCGGCACAATGAGAAAgTGGAGCT	54.05	3	57.22	-	59.38	CT>C	exon									0.145187
NM_001077365.2:c.1136_1137dup	POMT1	spCas9	spCas9_50	9:131513269-131513292	+	ACCTGTGAGGCACGGGGACA	Tgg	GAGACCTGTGAGGCACGGGGACATggtGGT	47.34	5	41.78	-	68.69	G>GGT	exon									-0.0238135
NM_001077365.2:c.1871_1872del	POMT1	spCas9	spCas9_52	9:131522072-131522095	+	TGGGGCGCTGTGTGCCGGTg	TGG	GGCTGGGGCGCTGTGTGCCGGTgTGGGCAG	42.96	3	56.26	-	72.16	GGC>G	exon									0.0688119
NM_001077365.2:c.1871_1872del	POMT1	spCas9	spCas9_54	9:131522085-131522108	-	AGGTAGTTCACTGCCCAcAC	CGG	GGGAGGTAGTTCACTGCCCAcACCGGCACA	55.07	1	59.83	-	57.98	GGC>G	exon									0.173037
NM_001077365.2:c.1524dup	POMT1	saCas9	saCas9_55	9:131519421-131519448	-	CTGACGTCCACCTGCGCAGGT	GtgAGT	CTGCTGACGTCCACCTGCGCAGGTGtgAGTGCAG	-	6	-	-	81.62	C>CA	exon
NM_001077365.2:c.1524dup	POMT1	CasX	CasX_56	9:131519430-131519454	-	TGCTGACGTCCACCTGCGCA	TTCC	TGAGGTTCCTGCTGACGTCCACCTGCGCAGGTG	-	7	-	-	-	C>CA	exon
NM_001077365.2:c.245del	POMT1	spCas9	spCas9_57	9:131506393-131506416	+	TCTGTTTCAGGTTATTTAGG	AGG	TCTTCTGTTTCAGGTTATTTAGGAGGaTCG	44.14	7	26.62	-	54.57	AT>A	5utr									-0.162929
NM_001077365.2:c.245del	POMT1	CasX	CasX_59	9:131506392-131506416	+	GTTTCAGGTTATTTAGGAGG	TTCT	TAATCTTCTGTTTCAGGTTATTTAGGAGGaTCG	-	2	-	-	-	AT>A	5utr
NM_001077365.2:c.245del	POMT1	CasX	CasX_61	9:131506419-131506443	-	GTTCCACAAAAAATTGCCAT	TTCT	TCCAATTCTGTTCCACAAAAAATTGCCATCGAt	-	5	-	-	-	AT>A	5utr
NM_001077365.2:c.245del	POMT1	Cas12a	Cas12a_63	9:131506397-131506422	+	AGGTTATTTAGGAGGaTCGAT	TTTC	TTCTGTTTCAGGTTATTTAGGAGGaTCGATGGCA	-	-3	-	18.24	-	AT>A	5utr
NM_001077365.2:c.1211dup	POMT1	spCas9	spCas9_64	9:131515443-131515466	+	CCCTGAGCCCCCATTCAcaC	AGG	CCCCCCTGAGCCCCCATTCAcaCAGGAGGT	54.42	1	50.23	-	57.42	C>CA	exon									0.0904027
NM_001077365.2:c.1211dup	POMT1	spCas9	spCas9_66	9:131515452-131515475	-	CAGGAGACCTCCTGtgTGAA	TGG	TAGCAGGAGACCTCCTGtgTGAATGGGGGC	37.13	-2	28.01	-	63.23	C>CA	exon									-0.194947
NM_001077365.2:c.1211dup	POMT1	saCas9	saCas9_70	9:131515454-131515481	-	ATGTAGCAGGAGACCTCCTGt	gTGAAT	TCAATGTAGCAGGAGACCTCCTGtgTGAATGGGG	-	4	-	-	60.29	C>CA	exon
NM_001077365.2:c.1175+2dup	POMT1	spCas9	spCas9_71	9:131513322-131513345	-	GGGCACACTCACacGTGTTC	AGG	GGCGGGCACACTCACacGTGTTCAGGGAGC	51.9	-4	43.34	-	60.95	G>GT	intron									0.0179395
NM_001077365.2:c.1175+2dup	POMT1	saCas9	saCas9_73	9:131513313-131513340	+	CCACCCGCTCCCTGAACACgt	GTGAGT	TGACCACCCGCTCCCTGAACACgtGTGAGTGTGC	-	2	-	-	61.53	G>GT	intron
NM_001077365.2:c.2113_2114dup	POMT1	CasX	CasX_74	9:131523031-131523055	-	TGTGGCGAGAGTagtGACTT	TTCA	TTGAGTTCATGTGGCGAGAGTagtGACTTGTCC	-	-5	-	-	-	A>ACT	exon
NM_001077365.2:c.432del	POMT1	CasX	CasX_75	9:131508895-131508919	+	TCTTTGAAACAGAGAaGCTC	TTCC	TGTGTTTCCTCTTTGAAACAGAGAaGCTCTCAT	-	-4	-	-	-	AT>A	exon
NM_001077365.2:c.432del	POMT1	Cas12a	Cas12a_76	9:131508894-131508919	+	CTCTTTGAAACAGAGAaGCTC	TTTC	ATGTGTTTCCTCTTTGAAACAGAGAaGCTCTCAT	-	-2	-	46.18	-	AT>A	exon
NM_001077365.2:c.1361T>G	POMT1	spCas9	spCas9_77	9:131518516-131518539	+	GAACACTTCCGCTGTCTgAA	AGG	CGTGAACACTTCCGCTGTCTgAAAGGTAAG	38.35	1	16.29	-	58.38	T>G	exon									-0.282835
NM_001077365.2:c.1361T>G	POMT1	spCas9	spCas9_79	9:131518523-131518546	-	TGTCCTTACCTTTcAGACAG	CGG	CAGTGTCCTTACCTTTcAGACAGCGGAAGT	46.3	-4	22.58	-	57.9	T>G	exon									-0.18462
NM_001077365.2:c.1361T>G	POMT1	Cas12a	Cas12a_80	9:131518505-131518530	+	TGCACGTGAACACTTCCGCTG	TTTG	TCCGCTTTGTGCACGTGAACACTTCCGCTGTCTg	-	7	-	59.02	-	T>G	exon
NM_001077365.2:c.1235dup	POMT1	CasX	CasX_81	9:131515456-131515480	+	CAGGAGGTCTCCTGCTACAT	TTCA	CCCCATTCACAGGAGGTCTCCTGCTACATTGAC	-	6	-	-	-	T>TA	exon
NM_001077365.2:c.1235dup	POMT1	CasX	CasX_82	9:131515487-131515511	-	GGGCGGGCATGGAGATGTTA	TTCT	AGAGGTTCTGGGCGGGCATGGAGATGTTATAta	-	5	-	-	-	T>TA	exon
NM_001077365.2:c.193G>A	POMT1	spCas9	spCas9_83	9:131506164-131506187	+	TCTTCTTCTTGGATGACAGT	aGG	AAATCTTCTTCTTGGATGACAGTaGGCCGC	42.94	4	37.55	-	71.73	G>A	5utr									-0.0851796
NM_001077365.2:c.193G>A	POMT1	CasX	CasX_84	9:131506166-131506190	+	TCTTGGATGACAGTaGGCCG	TTCT	AAATCTTCTTCTTGGATGACAGTaGGCCGCCAT	-	-5	-	-	-	G>A	5utr
NM_001077365.2:c.972_973insCT	POMT1	spCas9	spCas9_85	9:131511452-131511475	-	CTTACATCATGGGGTAGGTG	agg	CACCTTACATCATGGGGTAGGTGaggTCCT	64.89	6	54.34	-	76.46	C>CCT	exon									0.179398
NM_001077365.2:c.972_973insCT	POMT1	saCas9	saCas9_89	9:131511439-131511466	-	TGGGGTAGGTGaggTCCTGGT	GGGAAT	TCATGGGGTAGGTGaggTCCTGGTGGGAATGAAG	-	-5	-	-	71.22	C>CCT	exon
NM_001077365.2:c.972_973insCT	POMT1	CasX	CasX_90	9:131511437-131511461	+	TTCCCACCAGGAcctCACCT	TTCA	CTGGCTTCATTCCCACCAGGAcctCACCTACCC	-	-7	-	-	-	C>CCT	exon
NM_001077365.2:c.1474C>T	POMT1	spCas9	spCas9_91	9:131518930-131518953	+	AACGTGGAGGAGCACtGATA	CGG	TGGAACGTGGAGGAGCACtGATACGGCGCG	48.64	-2	46.43	-	59.84	C>T	exon									0.024729
NM_001077365.2:c.1474C>T	POMT1	saCas9	saCas9_92	9:131518933-131518960	+	GTGGAGGAGCACtGATACGGC	GCGAGT	AACGTGGAGGAGCACtGATACGGCGCGAGTGAGT	-	-6	-	-	67.56	C>T	exon
NM_001077365.2:c.280+1G>T	POMT1	Cas12a	Cas12a_93	9:131506431-131506456	+	TGGAACAGAATTGGAGCAGtT	TTTG	AATTTTTTGTGGAACAGAATTGGAGCAGtTAAAA	-	2	-	47.92	-	G>T	5utr
NM_001077365.2:c.2044dup	POMT1	spCas9	spCas9_94	9:131522947-131522970	+	GAGCATCTTCAGCGCCCTGG	TGG	GAGGAGCATCTTCAGCGCCCTGGTGGtgTG	50.62	7	46.25	-	70.68	T>TG	exon									0.0314733
NM_001077365.2:c.2044dup	POMT1	spCas9	spCas9_97	9:131522961-131522984	-	GAGTACCAGGCCAcaCCACC	AGG	GAGGAGTACCAGGCCAcaCCACCAGGGCGC	67.89	-3	75.37	-	93.88	T>TG	exon									0.36466
NM_001077365.2:c.2044dup	POMT1	CasX	CasX_99	9:131522954-131522978	+	GCGCCCTGGTGGtgTGGCCT	TTCA	GCATCTTCAGCGCCCTGGTGGtgTGGCCTGGTA	-	-7	-	-	-	T>TG	exon
NM_001077365.2:c.7G>T	POMT1	spCas9	spCas9_100	9:131504202-131504225	+	GCCCGCTTTTCTACAAGATG	TGG	TGAGCCCGCTTTTCTACAAGATGTGGtGAT	49.19	7	42.3	-	62.21	G>T	5utr									-0.00678555
NM_001077365.2:c.7G>T	POMT1	Cas12a	Cas12a_101	9:131504209-131504234	+	TACAAGATGTGGtGATTTTTG	TTTC	CCGCTTTTCTACAAGATGTGGtGATTTTTGAAGC	-	-6	-	36.42	-	G>T	5utr
NM_001077365.2:c.264G>A	POMT1	spCas9	spCas9_102	9:131506426-131506449	+	AATTTTTTGTGaAACAGAAT	TGG	GGCAATTTTTTGTGaAACAGAATTGGAGCA	38.51	-6	2.42	-	58.07	G>A	5utr									-0.395975
NM_001077365.2:c.264G>A	POMT1	saCas9	saCas9_103	9:131506419-131506446	+	CGATGGCAATTTTTTGTGaAA	CAGAAT	ATTCGATGGCAATTTTTTGTGaAACAGAATTGGA	-	1	-	-	57.04	G>A	5utr
NM_001077365.2:c.264G>A	POMT1	CasX	CasX_104	9:131506417-131506441	+	ATGGCAATTTTTTGTGaAAC	TTCG	GAGGATTCGATGGCAATTTTTTGTGaAACAGAA	-	-3	-	-	-	G>A	5utr
NM_001077365.2:c.264G>A	POMT1	Cas12a	Cas12a_105	9:131506433-131506458	-	CCTGCTCCAATTCTGTTtCAC	TTTA	TATCTTTTACCTGCTCCAATTCTGTTtCACAAAA	-	-1	-	26.95	-	G>A	5utr
NM_001077365.2:c.1194_1196del	POMT1	spCas9	spCas9_106	9:131515441-131515464	-	ACCTCCTGTGAATGGGGGCT	CgG	GAGACCTCCTGTGAATGGGGGCTCgGGGCT	31.14	5	24.48	-	68.42	CCCT>C	exon									-0.260465
NM_001077365.2:c.1194_1196del	POMT1	CasX	CasX_109	9:131515420-131515444	+	AGGCATGATGTTGCAGCCCc	TTCC	TGGTTTTCCAGGCATGATGTTGCAGCCCcGAGC	-	1	-	-	-	CCCT>C	exon
NM_001077365.2:c.1194_1196del	POMT1	Cas12a	Cas12a_110	9:131515419-131515444	+	CAGGCATGATGTTGCAGCCCc	TTTC	TTGGTTTTCCAGGCATGATGTTGCAGCCCcGAGC	-	3	-	52.93	-	CCCT>C	exon
NM_001077365.2:c.598G>C	POMT1	spCas9	spCas9_111	9:131509785-131509808	+	GGTCGCTTGTTCCTGTcCAG	TGG	AGGGGTCGCTTGTTCCTGTcCAGTGGGGTG	45.5	-1	38.67	-	60.83	G>C	exon									-0.0577315
NM_001077365.2:c.598G>C	POMT1	spCas9	spCas9_114	9:131509800-131509823	-	GAGGCTCAAACTCACCCCAC	TGg	CCAGAGGCTCAAACTCACCCCACTGgACAG	54.4	6	49.5	-	59.54	G>C	exon									0.0836313
NM_001077365.2:c.598G>C	POMT1	saCas9	saCas9_116	9:131509784-131509811	+	GGGTCGCTTGTTCCTGTcCAG	TGGGGT	CAGGGGTCGCTTGTTCCTGTcCAGTGGGGTGAGT	-	-1	-	-	58.28	G>C	exon
NM_001077365.2:c.1939G>A	POMT1	spCas9	spCas9_118	9:131522157-131522180	-	AAGGATTTGGAAGGTGAGTG	tGG	CAGAAGGATTTGGAAGGTGAGTGtGGGCAG	60.14	4	62.43	-	63.37	G>A	exon									0.222318
NM_001077365.2:c.1939G>A	POMT1	CasX	CasX_121	9:131522139-131522163	+	TCTACCACTACCTGCCCaCA	TTCC	CACTCTTCCTCTACCACTACCTGCCCaCACTCA	-	-2	-	-	-	G>A	exon
NM_001077365.2:c.1939G>A	POMT1	Cas12a	Cas12a_122	9:131522150-131522175	-	GAAGGTGAGTGtGGGCAGGTA	TTTG	AAGGATTTGGAAGGTGAGTGtGGGCAGGTAGTGG	-	-7	-	73.2	-	G>A	exon
NM_001077365.2:c.1061G>A	POMT1	spCas9	spCas9_123	9:131512104-131512127	+	CAATAACTGGTaGATTGTAA	AGG	TGTCAATAACTGGTaGATTGTAAAGGATCC	48.46	-6	20.72	-	65.42	G>A	exon									-0.189645
NM_001077365.2:c.1061G>A	POMT1	saCas9	saCas9_124	9:131512102-131512129	+	GTCAATAACTGGTaGATTGTA	AAGGAT	GATGTCAATAACTGGTaGATTGTAAAGGATCCCA	-	-5	-	-	69.03	G>A	exon
NM_001077365.2:c.1061G>A	POMT1	CasX	CasX_125	9:131512093-131512117	+	AAGATGTCAATAACTGGTaG	TTCA	ACCCCTTCAAAGATGTCAATAACTGGTaGATTG	-	-1	-	-	-	G>A	exon
NM_001077365.2:c.559del	POMT1	spCas9	spCas9_126	9:131509739-131509762	+	CCAGCCCTTTTTCTCTGAGC	TGg	ATTCCAGCCCTTTTTCTCTGAGCTGgGGTT	37.04	6	11.13	-	51.38	GT>G	exon									-0.330802
NM_001077365.2:c.559del	POMT1	saCas9	saCas9_130	9:131509738-131509765	+	TCCAGCCCTTTTTCTCTGAGC	TGgGGT	TATTCCAGCCCTTTTTCTCTGAGCTGgGGTTCTG	-	6	-	-	55.26	GT>G	exon
NM_001077365.2:c.559del	POMT1	CasX	CasX_131	9:131509737-131509761	+	AGCCCTTTTTCTCTGAGCTG	TTCC	TTTTATTCCAGCCCTTTTTCTCTGAGCTGgGGT	-	2	-	-	-	GT>G	exon
NM_001077365.2:c.559del	POMT1	Cas12a	Cas12a_132	9:131509733-131509758	+	TTCCAGCCCTTTTTCTCTGAG	TTTA	TTGTTTTTATTCCAGCCCTTTTTCTCTGAGCTGg	-	7	-	1.97	-	GT>G	exon
NM_001077365.2:c.2141G>A	POMT1	spCas9	spCas9_133	9:131523060-131523083	-	CCCAGCTGTCTTTCtAGCGA	AGG	TGTCCCAGCTGTCTTTCtAGCGAAGGGCCT	54.6	-3	33.96	-	67.3	G>A	exon									-0.0454824
NM_001077365.2:c.2141G>A	POMT1	CasX	CasX_135	9:131523074-131523098	-	GATCAAGATGTCCCAGCTGT	TTCG	GTGTTTTCGGATCAAGATGTCCCAGCTGTCTTT	-	7	-	-	-	G>A	exon
NM_001077365.2:c.1977del	POMT1	spCas9	spCas9_136	9:131522194-131522217	-	AGGTGGTCGCTGATGTGCTG	aGG	CACAGGTGGTCGCTGATGTGCTGaGGACCA	59.97	4	52.33	-	72.71	TG>T	exon									0.135346
NM_001077365.2:c.1977del	POMT1	CasX	CasX_139	9:131522169-131522193	+	AAATCCTTCTGCTCCCTGTG	TTCC	TCACCTTCCAAATCCTTCTGCTCCCTGTGGTCC	-	6	-	-	-	TG>T	exon
NM_001077365.2:c.260dup	POMT1	spCas9	spCas9_141	9:131506417-131506440	+	TTCGATGGCAatATTTTTTG	TGG	GGATTCGATGGCAatATTTTTTGTGGAACA	36	-7	13.31	-	63.05	A>AT	5utr									-0.322471
NM_001077365.2:c.260dup	POMT1	saCas9	saCas9_142	9:131506415-131506442	-	GTTCCACAAAAAATatTGCCA	TCGAAT	TCTGTTCCACAAAAAATatTGCCATCGAATCCTC	-	-3	-	-	64.03	A>AT	5utr
NM_001077365.2:c.260dup	POMT1	CasX	CasX_143	9:131506398-131506422	+	GGTTATTTAGGAGGATTCGA	TTCA	TCTGTTTCAGGTTATTTAGGAGGATTCGATGGC	-	7	-	-	-	A>AT	5utr
NM_001077365.2:c.260dup	POMT1	CasX	CasX_144	9:131506422-131506446	-	GTTCCACAAAAAATatTGCC	TTCT	TCCAATTCTGTTCCACAAAAAATatTGCCATCG	-	-4	-	-	-	A>AT	5utr
NM_001077365.2:c.260dup	POMT1	Cas12a	Cas12a_145	9:131506407-131506432	+	GGAGGATTCGATGGCAatATT	TTTA	GGTTATTTAGGAGGATTCGATGGCAatATTTTTT	-	-2	-	71.82	-	A>AT	5utr
NM_001077365.2:c.1175+1G>A	POMT1	spCas9	spCas9_146	9:131513322-131513345	-	GCGGGCACACTCAtGTGTTC	AGG	ACGGCGGGCACACTCAtGTGTTCAGGGAGC	49.48	-4	26.36	-	70.5	G>A	intron									-0.138829
NM_001077365.2:c.1175+1G>A	POMT1	saCas9	saCas9_148	9:131513311-131513338	+	GACCACCCGCTCCCTGAACAC	aTGAGT	CATGACCACCCGCTCCCTGAACACaTGAGTGTGC	-	4	-	-	61.04	G>A	intron
NM_001077365.2:c.418_420del	POMT1	spCas9	spCas9_149	9:131507490-131507513	+	GGAGCTGCTCTGtTGCTTAT	CGG	ATGGGAGCTGCTCTGtTGCTTATCGGTAAG	41.27	-5	9.12	-	67.15	TTGA>T	exon									-0.327522
NM_001077365.2:c.2101dup	POMT1	spCas9	spCas9_150	9:131523007-131523030	+	GCTGCGCCCACTCACCTAcg	CGG	CACGCTGCGCCCACTCACCTAcgCGGGGAC	56.51	2	37.85	-	68.37	C>CG	exon									-0.00266694
NM_001077365.2:c.2101dup	POMT1	spCas9	spCas9_153	9:131523020-131523043	-	AGAGTGACTTGTCCCCGcgT	AGG	GCGAGAGTGACTTGTCCCCGcgTAGGTGAG	42.74	2	45.97	-	72.32	C>CG	exon									-0.0172172
NM_001077365.2:c.2101dup	POMT1	saCas9	saCas9_156	9:131523015-131523042	-	GAGTGACTTGTCCCCGcgTAG	GTGAGT	CGAGAGTGACTTGTCCCCGcgTAGGTGAGTGGGC	-	-1	-	-	69.19	C>CG	exon
NM_001077365.2:c.2101dup	POMT1	CasX	CasX_157	9:131523030-131523054	-	TGTGGCGAGAGTGACTTGTC	TTCA	TTGAGTTCATGTGGCGAGAGTGACTTGTCCCCG	-	7	-	-	-	C>CG	exon
NM_001077365.2:c.1364del	POMT1	spCas9	spCas9_158	9:131518515-131518538	+	TGAACACTTCCGCTGTCTtA	AGG	ACGTGAACACTTCCGCTGTCTtAAGGTAAG	37.49	2	10.94	-	70.06	TA>T	exon									-0.335439
NM_001077365.2:c.1364del	POMT1	spCas9	spCas9_160	9:131518523-131518546	-	GTGTCCTTACCTTaAGACAG	CGG	ACAGTGTCCTTACCTTaAGACAGCGGAAGT	58.01	-4	35.88	-	84.82	TA>T	exon									-0.0151614
NM_001077365.2:c.1364del	POMT1	Cas12a	Cas12a_161	9:131518505-131518530	+	TGCACGTGAACACTTCCGCTG	TTTG	TCCGCTTTGTGCACGTGAACACTTCCGCTGTCTt	-	7	-	59.53	-	TA>T	exon
NM_001077365.2:c.1038del	POMT1	spCas9	spCas9_162	9:131512088-131512111	-	CAGTTATTGACATCTTTGAA	GGG	CACCAGTTATTGACATCTTTGAAGGGtAAC	54.99	7	43.43	-	64.47	AC>A	exon									0.0356008
NM_001077365.2:c.1182dup	POMT1	spCas9	spCas9_164	9:131515421-131515444	-	GGGCTGCAACATatCATGCC	TGG	GGGGGGCTGCAACATatCATGCCTGGAAAA	54.95	-4	45.71	-	60.15	A>AT	exon									0.0554517
NM_001077365.2:c.1091del	POMT1	spCas9	spCas9_165	9:131513226-131513249	+	CTGTGTCTTCCAGGCACCAG	cGG	GCACTGTGTCTTCCAGGCACCAGcGGTGGT	45.88	4	39.6	-	75.39	CT>C	exon									-0.0523013
NM_001077365.2:c.1091del	POMT1	spCas9	spCas9_167	9:131513241-131513264	-	GGAGGGCTGCTCACCACCgC	TGG	CTCGGAGGGCTGCTCACCACCgCTGGTGCC	40.04	2	45.36	-	70.94	CT>C	exon									-0.03754
NM_001077365.2:c.1158del	POMT1	spCas9	spCas9_169	9:131513301-131513324	-	AGGGAGCGGGTGtCATGCCG	TGG	TTCAGGGAGCGGGTGtCATGCCGTGGACCA	53.07	-5	59.03	-	85.76	AC>A	exon									0.146339
NM_001077365.2:c.226G>A	POMT1	spCas9	spCas9_170	9:131506199-131506222	+	CACATGGTGCTGGCCTTGaG	AGG	GGCCACATGGTGCTGGCCTTGaGAGGTAGG	48.88	2	66.31	-	62.25	G>A	5utr									0.189029
NM_001077365.2:c.226G>A	POMT1	spCas9	spCas9_172	9:131506211-131506234	-	CTGATGACTCCTACCTCtCA	AGG	CTCCTGATGACTCCTACCTCtCAAGGCCAG	62.6	1	76.37	-	58.32	G>A	5utr									0.352925
NM_001077365.2:c.226G>A	POMT1	saCas9	saCas9_173	9:131506202-131506229	+	ATGGTGCTGGCCTTGaGAGGT	AGGAGT	CACATGGTGCTGGCCTTGaGAGGTAGGAGTCATC	-	-3	-	-	66.08	G>A	5utr
NM_001077365.2:c.226G>A	POMT1	Cas12a	Cas12a_174	9:131506193-131506218	+	GCCACATGGTGCTGGCCTTGa	TTTG	CGCCATTTGGCCACATGGTGCTGGCCTTGaGAGG	-	3	-	73.09	-	G>A	5utr
NM_001077365.2:c.1457G>A	POMT1	spCas9	spCas9_175	9:131518914-131518937	+	CGGGAGCACGGTGTaGAACG	TGG	CCACGGGAGCACGGTGTaGAACGTGGAGGA	67.57	-3	65.05	-	63.09	G>A	exon									0.287235
NM_001077365.2:c.633C>G	POMT1	spCas9	spCas9_177	9:131509909-131509932	+	GTACATGGGTGTGTTCACGT	AgG	CAAGTACATGGGTGTGTTCACGTAgGTGCT	52.2	5	45.72	-	64.3	C>G	exon									0.0382557
NM_001077365.2:c.633C>G	POMT1	saCas9	saCas9_178	9:131509919-131509946	+	GTGTTCACGTAgGTGCTCGTG	CTGGGT	GGTGTGTTCACGTAgGTGCTCGTGCTGGGTGTTG	-	-7	-	-	68.73	C>G	exon
NM_001077365.2:c.841C>T	POMT1	spCas9	spCas9_179	9:131510382-131510405	+	AATCATGTCCAGTGCCTTCt	AGG	CCAAATCATGTCCAGTGCCTTCtAGGCCAG	47.43	3	51.72	-	63.91	C>T	exon									0.0599858
NM_001077365.2:c.841C>T	POMT1	spCas9	spCas9_180	9:131510395-131510418	-	TACCTCTAAGCTGGCCTaGA	AGG	ACTTACCTCTAAGCTGGCCTaGAAGGCACT	44.64	1	40.32	-	64.17	C>T	exon									-0.0501758
NM_001077365.2:c.72del	POMT1	spCas9	spCas9_182	9:131504267-131504290	+	TTGAGCCTTGTGGCCCTGAC	tGG	AACTTGAGCCTTGTGGCCCTGACtGGATGG	45.74	4	49.73	-	65.42	TG>T	5utr									0.0333044
NM_001077365.2:c.72del	POMT1	spCas9	spCas9_186	9:131504280-131504303	-	CTCAGTAACCCCATCCaGTC	AGG	CGGCTCAGTAACCCCATCCaGTCAGGGCCA	63.8	-1	62.5	-	70.08	TG>T	5utr									0.242162
NM_001077365.2:c.72del	POMT1	saCas9	saCas9_188	9:131504265-131504292	+	ACTTGAGCCTTGTGGCCCTGA	CtGGAT	TCAACTTGAGCCTTGTGGCCCTGACtGGATGGGG	-	5	-	-	62.85	TG>T	5utr
NM_001077365.2:c.1458G>A	POMT1	spCas9	spCas9_190	9:131518914-131518937	+	CGGGAGCACGGTGTGaAACG	TGG	CCACGGGAGCACGGTGTGaAACGTGGAGGA	57.37	-2	63.13	-	68.01	G>A	exon									0.210536
NM_001077365.2:c.1917_1918del	POMT1	CasX	CasX_192	9:131522115-131522139	+	TCCTGATGGAGAAGACaCTT	TTCT	TCCCGTTCTTCCTGATGGAGAAGACaCTTCCTC	-	-3	-	-	-	ACT>A	exon
NM_001077365.2:c.91del	POMT1	spCas9	spCas9_194	9:131504286-131504309	+	CTGGGATGGGGTTACTGAGC	CGg	TGACTGGGATGGGGTTACTGAGCCGgTGTG	39.32	6	28.03	-	62.49	GC>G	5utr									-0.181804
NM_001077365.2:c.91del	POMT1	spCas9	spCas9_196	9:131504304-131504327	-	GGGTAGGTGAGTCGCCACAc	CGG	CGCGGGTAGGTGAGTCGCCACAcCGGCTCA	58.14	3	62.77	-	62.54	GC>G	5utr									0.213724
NM_001077365.2:c.1792C>T	POMT1	spCas9	spCas9_197	9:131521422-131521445	+	CCTTGTGGTACCTGCTCtGA	CGG	TGTCCTTGTGGTACCTGCTCtGACGGCGAA	50.48	1	51.54	-	63.67	C>T	exon									0.0763377
NM_001077365.2:c.1792C>T	POMT1	spCas9	spCas9_198	9:131521431-131521454	-	CATTTCTTCGCCGTCaGAGC	AGG	GGACATTTCTTCGCCGTCaGAGCAGGTACC	56.65	-2	32.91	-	60.75	C>T	exon									-0.0401915
NM_001077365.2:c.2142del	POMT1	spCas9	spCas9_199	9:131523060-131523083	-	TCCCAGCTGTCTTTCaGCGA	AGG	ATGTCCCAGCTGTCTTTCaGCGAAGGGCCT	51.77	-2	17.16	-	81.55	TG>T	exon									-0.204589
NM_001077365.2:c.2142del	POMT1	CasX	CasX_201	9:131523073-131523097	-	GATCAAGATGTCCCAGCTGT	TTCG	GTGTTTTCGGATCAAGATGTCCCAGCTGTCTTT	-	7	-	-	-	TG>T	exon
NM_001077365.2:c.485del	POMT1	Cas12a	Cas12a_202	9:131508945-131508970	+	GAATCAGTGTTAATaTTTTCA	TTTG	ATGCTTTTGGAATCAGTGTTAATaTTTTCAATCT	-	-4	-	49.94	-	AT>A	exon
NM_001077365.2:c.1477_1486del	POMT1	spCas9	spCas9_203	9:131518943-131518966	-	AGCCACGCCGCGGACTCACT	CGg	GGAAGCCACGCCGCGGACTCACTCGgTGCT	41.84	6	40.01	-	71.98	CCGATACGGCG>C	exon									-0.0714124
NM_001077365.2:c.1477_1486del	POMT1	saCas9	saCas9_204	9:131518923-131518950	+	GGTGTGGAACGTGGAGGAGCA	cCGAGT	CACGGTGTGGAACGTGGAGGAGCAcCGAGTGAGT	-	4	-	-	65.49	CCGATACGGCG>C	exon
NM_001077365.2:c.58dup	POMT1	spCas9	spCas9_206	9:131504259-131504282	+	ACATCAACTTGAGCCTtgTG	TGG	CTGACATCAACTTGAGCCTtgTGTGGCCCT	61.82	-1	50.35	-	75.42	T>TG	5utr									0.128995
NM_001077365.2:c.58dup	POMT1	spCas9	spCas9_207	9:131504271-131504294	-	ATCCCAGTCAGGGCCACAca	AGG	CCCATCCCAGTCAGGGCCACAcaAGGCTCA	63.93	3	76.19	-	73.71	T>TG	5utr									0.354498
NM_001077365.2:c.1195dup	POMT1	CasX	CasX_208	9:131515420-131515444	+	AGGCATGATGTTGCAgcGCC	TTCC	TGGTTTTCCAGGCATGATGTTGCAgcGCCCCCC	-	-4	-	-	-	G>GC	exon
NM_001077365.2:c.1195dup	POMT1	Cas12a	Cas12a_209	9:131515419-131515444	+	CAGGCATGATGTTGCAgcGCC	TTTC	TTGGTTTTCCAGGCATGATGTTGCAgcGCCCCCC	-	-2	-	52.02	-	G>GC	exon
NM_001077365.2:c.1195_1196del	POMT1	spCas9	spCas9_210	9:131515442-131515465	-	ACCTCCTGTGAATGGGGGCT	CgG	GAGACCTCCTGTGAATGGGGGCTCgGGGGC	31.18	5	24.75	-	71.25	CCT>C	exon									-0.258872
NM_001077365.2:c.1195_1196del	POMT1	CasX	CasX_214	9:131515420-131515444	+	AGGCATGATGTTGCAGCCCC	TTCC	TGGTTTTCCAGGCATGATGTTGCAGCCCCcGAG	-	2	-	-	-	CCT>C	exon
NM_001077365.2:c.1195_1196del	POMT1	Cas12a	Cas12a_215	9:131515419-131515444	+	CAGGCATGATGTTGCAGCCCC	TTTC	TTGGTTTTCCAGGCATGATGTTGCAGCCCCcGAG	-	4	-	56.21	-	CCT>C	exon
NM_001077365.2:c.699+24C>A	POMT1	spCas9	spCas9_216	9:131510004-131510027	+	CTGATGTCCAGTGCTGaATG	AGG	GTGCTGATGTCCAGTGCTGaATGAGGCCGG	65	-1	72.1	-	88.75	C>A	intron									0.322479
NM_001077365.2:c.699+24C>A	POMT1	spCas9	spCas9_218	9:131510010-131510033	-	AGGCCGGCCTCATtCAGCAC	TGG	TACAGGCCGGCCTCATtCAGCACTGGACAT	49.39	-4	56.37	-	75.11	C>A	intron									0.106261
NM_001077365.2:c.699+24C>A	POMT1	saCas9	saCas9_219	9:131509996-131510023	+	TGTAGGTGCTGATGTCCAGTG	CTGaAT	CAATGTAGGTGCTGATGTCCAGTGCTGaATGAGG	-	7	-	-	74.17	C>A	intron
NM_001077365.2:c.1724_1725del	POMT1	spCas9	spCas9_220	9:131521357-131521380	+	CCTACTTGGAAAcAGTGATC	TGG	CCACCTACTTGGAAAcAGTGATCTGGGTTT	46.23	-5	32.85	-	63.7	CAT>C	exon									-0.102261
NM_001077365.2:c.1724_1725del	POMT1	spCas9	spCas9_222	9:131521356-131521379	-	CCAGATCACTgTTTCCAAGT	AGG	AACCCAGATCACTgTTTCCAAGTAGGTGGA	47.97	-7	24.24	-	62.36	CAT>C	exon									-0.162591
NM_001077365.2:c.1724_1725del	POMT1	saCas9	saCas9_223	9:131521355-131521382	+	CACCTACTTGGAAAcAGTGAT	CTGGGT	ATCCACCTACTTGGAAAcAGTGATCTGGGTTTCG	-	-4	-	-	66.53	CAT>C	exon
NM_001077365.2:c.990T>A	POMT1	spCas9	spCas9_224	9:131512030-131512053	+	ACTTCACACAGATAaGAGAA	CGG	TTGACTTCACACAGATAaGAGAACGGCCGA	53.08	-3	50.89	-	62.31	T>A	exon									0.086542
NM_001077365.2:c.990T>A	POMT1	Cas12a	Cas12a_225	9:131512023-131512048	+	TTGACTTCACACAGATAaGAG	TTTG	ATCTCTTTGTTGACTTCACACAGATAaGAGAACG	-	-1	-	34.91	-	T>A	exon
NM_001077365.2:c.558G>A	POMT1	spCas9	spCas9_226	9:131509742-131509765	+	GCCCTTTTTCTCTGAGCTGa	TGG	CCAGCCCTTTTTCTCTGAGCTGaTGGTTCT	37.88	3	16.23	-	73.64	G>A	exon									-0.290716
NM_001077365.2:c.558G>A	POMT1	CasX	CasX_228	9:131509737-131509761	+	AGCCCTTTTTCTCTGAGCTG	TTCC	TTTTATTCCAGCCCTTTTTCTCTGAGCTGaTGG	-	2	-	-	-	G>A	exon
NM_001077365.2:c.558G>A	POMT1	Cas12a	Cas12a_229	9:131509733-131509758	+	TTCCAGCCCTTTTTCTCTGAG	TTTA	TTGTTTTTATTCCAGCCCTTTTTCTCTGAGCTGa	-	7	-	1.9	-	G>A	exon
NM_001077365.2:c.1417G>C	POMT1	spCas9	spCas9_230	9:131518868-131518891	+	ATCGGCAACTGGAGATCGTC	cGG	GGTATCGGCAACTGGAGATCGTCcGGGAGA	57.17	4	59.47	-	64.97	G>C	exon									0.180172
NM_001077365.2:c.1417G>C	POMT1	spCas9	spCas9_232	9:131518886-131518909	-	AGCCCCGGGACAGCTTCTCC	CgG	GGTAGCCCCGGGACAGCTTCTCCCgGACGA	50.47	5	68.83	-	67.86	G>C	exon									0.21732
NM_001077365.2:c.789_790del	POMT1	spCas9	spCas9_233	9:131510342-131510365	-	AGAGCGGAAGACTAGAAaAG	TGG	CCCAGAGCGGAAGACTAGAAaAGTGGACGT	56.26	1	66.36	-	77.6	TGA>T	exon									0.227736
NM_001077365.2:c.789_790del	POMT1	CasX	CasX_234	9:131510332-131510356	+	TCTACGTCCACTtTTCTAGT	TTCT	TACTGTTCTTCTACGTCCACTtTTCTAGTCTTC	-	-7	-	-	-	TGA>T	exon
NM_001077365.2:c.2113_2119del	POMT1	saCas9	saCas9_235	9:131523036-131523063	-	CCAGCGAAGGGCCTTGAGTTC	ATGaGT	TTTCCAGCGAAGGGCCTTGAGTTCATGaGTGACT	-	7	-	-	69.4	TCTCGCCA>T	exon
NM_001077365.2:c.2113_2119del	POMT1	CasX	CasX_236	9:131523041-131523065	-	AGCGAAGGGCCTTGAGTTCA	TTCC	TGTCTTTCCAGCGAAGGGCCTTGAGTTCATGaG	-	4	-	-	-	TCTCGCCA>T	exon
NM_001077365.2:c.2113_2119del	POMT1	Cas12a	Cas12a_237	9:131523041-131523066	-	CAGCGAAGGGCCTTGAGTTCA	TTTC	CTGTCTTTCCAGCGAAGGGCCTTGAGTTCATGaG	-	6	-	56.02	-	TCTCGCCA>T	exon
NM_001077365.2:c.145del	POMT1	spCas9	spCas9_238	9:131506112-131506135	+	AGTTTTGACGAAGTATATTA	TGG	TCTAGTTTTGACGAAGTATATTATGGgAGT	27.45	7	18.18	-	61.64	GC>G	5utr									-0.331743
NM_001077365.2:c.145del	POMT1	saCas9	saCas9_240	9:131506112-131506139	+	AGTTTTGACGAAGTATATTAT	GGgAGT	TCTAGTTTTGACGAAGTATATTATGGgAGTACAT	-	6	-	-	62.62	GC>G	5utr
NM_001077365.2:c.145del	POMT1	CasX	CasX_241	9:131506108-131506132	+	AGTTTTGACGAAGTATATTA	TTCT	TTTTTTTCTAGTTTTGACGAAGTATATTATGGg	-	5	-	-	-	GC>G	5utr
NM_001077365.2:c.145del	POMT1	CasX	CasX_242	9:131506133-131506157	-	TGTAAAAAGAGATGTACTcC	TTCA	TTTGTTTCATGTAAAAAGAGATGTACTcCCATA	-	-1	-	-	-	GC>G	5utr
NM_001077365.2:c.145del	POMT1	Cas12a	Cas12a_243	9:131506107-131506132	+	TAGTTTTGACGAAGTATATTA	TTTC	TTTTTTTTCTAGTTTTGACGAAGTATATTATGGg	-	7	-	13.32	-	GC>G	5utr
NM_001077365.2:c.145del	POMT1	Cas12a	Cas12a_245	9:131506137-131506162	-	TTTCATGTAAAAAGAGATGTA	TTTG	GAAGATTTGTTTCATGTAAAAAGAGATGTACTcC	-	6	-	29.26	-	GC>G	5utr
NM_007171.4:c.429_430del	POMT1	spCas9	spCas9_247	9:131508896-131508919	-	GAGAGCATTCTgTTTCAAAG	AGG	GATGAGAGCATTCTgTTTCAAAGAGGAAAC	50.87	-6	48.04	-	73.12	CAG>C	intron									0.0469193
NM_007171.4:c.429_430del	POMT1	saCas9	saCas9_248	9:131508887-131508914	+	ACATGTGTTTCCTCTTTGAAA	cAGAAT	TTGACATGTGTTTCCTCTTTGAAAcAGAATGCTC	-	4	-	-	65.41	CAG>C	intron
NM_001077365.2:c.1892C>T	POMT1	spCas9	spCas9_249	9:131522110-131522133	-	TCTTCTCCATCAGGAAGAAC	aGG	GTGTCTTCTCCATCAGGAAGAACaGGAGGT	63.41	4	64.17	-	36.83	C>T	exon									0.263771
NM_001077365.2:c.1892C>T	POMT1	CasX	CasX_251	9:131522107-131522131	-	CCATCAGGAAGAACaGGAGG	TTCT	GTGTCTTCTCCATCAGGAAGAACaGGAGGTAGT	-	-5	-	-	-	C>T	exon
NM_001077365.2:c.1798C>T	POMT1	spCas9	spCas9_252	9:131521422-131521445	+	CCTTGTGGTACCTGCTCCGA	CGG	TGTCCTTGTGGTACCTGCTCCGACGGtGAA	48.26	7	36.96	-	63.06	C>T	exon									-0.0564148
NM_001077365.2:c.1798C>T	POMT1	spCas9	spCas9_253	9:131521437-131521460	-	CATGGACATTTCTTCaCCGT	CGG	GGTCATGGACATTTCTTCaCCGTCGGAGCA	42.17	-2	24.1	-	74.28	C>T	exon									-0.201151
NM_001077365.2:c.579_580del	POMT1	spCas9	spCas9_254	9:131509761-131509784	+	GTGGTTCTGGCTAACACTGA	cGG	CTGGTGGTTCTGGCTAACACTGAcGGGTCG	56.93	4	58.43	-	71.12	CAG>C	exon									0.168339
NM_001077365.2:c.579_580del	POMT1	saCas9	saCas9_256	9:131509759-131509786	+	TGGTGGTTCTGGCTAACACTG	AcGGGT	AGCTGGTGGTTCTGGCTAACACTGAcGGGTCGCT	-	5	-	-	63	CAG>C	exon
NM_001077365.2:c.579_580del	POMT1	CasX	CasX_257	9:131509765-131509789	+	GGCTAACACTGAcGGGTCGC	TTCT	GGTGGTTCTGGCTAACACTGAcGGGTCGCTTGT	-	-7	-	-	-	CAG>C	exon
NM_001077365.2:c.1657del	POMT1	spCas9	spCas9_258	9:131520132-131520155	+	GCCCACTGGAGTGGGTCaCC	TGG	CCAGCCCACTGGAGTGGGTCaCCTGGACAC	54.28	1	52.99	-	69.81	AC>A	exon									0.108529
NM_001077365.2:c.1657del	POMT1	spCas9	spCas9_259	9:131520149-131520172	-	AGTAGGCAATATTGGTGTCC	AGG	GCCAGTAGGCAATATTGGTGTCCAGGtGAC	57.4	7	55.07	-	63.88	AC>A	exon									0.145626
NM_001077365.2:c.1921C>T	POMT1	saCas9	saCas9_260	9:131522134-131522161	-	GCGGGCAGGTAGTGGTAGAaG	AAGAGT	AGTGCGGGCAGGTAGTGGTAGAaGAAGAGTGTCT	-	2	-	-	57.23	C>T	exon
NM_001077365.2:c.1921C>T	POMT1	CasX	CasX_261	9:131522115-131522139	+	TCCTGATGGAGAAGACACTC	TTCT	TCCCGTTCTTCCTGATGGAGAAGACACTCTTCt	-	5	-	-	-	C>T	exon
NM_001077365.2:c.443C>A	POMT1	spCas9	spCas9_263	9:131508914-131508937	+	ATGCTCTCATCAaTCAGTCA	AGG	AGAATGCTCTCATCAaTCAGTCAAGGCTAA	55.41	-5	48.97	-	66.63	C>A	exon									0.0829892
NM_001077365.2:c.443C>A	POMT1	CasX	CasX_264	9:131508927-131508951	-	AAAAGCATTAGCCTTGACTG	TTCC	ACTGATTCCAAAAGCATTAGCCTTGACTGAtTG	-	3	-	-	-	C>A	exon
NM_001077365.2:c.443C>A	POMT1	Cas12a	Cas12a_265	9:131508901-131508926	+	AAACAGAGAATGCTCTCATCA	TTTG	TCCTCTTTGAAACAGAGAATGCTCTCATCAaTCA	-	4	-	62.93	-	C>A	exon
NM_001077365.2:c.2004-1G>C	POMT1	spCas9	spCas9_266	9:131522922-131522945	-	TCTGGAGCTGGGACgTGCAG	AGG	TCCTCTGGAGCTGGGACgTGCAGAGGTCAG	52.35	-3	54.05	-	70.24	G>C	exon									0.105885
NM_001077365.2:c.1015C>T	POMT1	spCas9	spCas9_267	9:131512056-131512079	+	AGGCAGCTCCCACtAGCAAC	AGG	CCGAGGCAGCTCCCACtAGCAACAGGTGAC	64.05	-4	71.01	-	65.79	C>T	exon									0.314973
NM_001077365.2:c.1015C>T	POMT1	spCas9	spCas9_268	9:131512064-131512087	-	AACAGGTCACCTGTTGCTaG	TGG	GGTAACAGGTCACCTGTTGCTaGTGGGAGC	52.12	2	40.76	-	63.05	C>T	exon									-0.002656
NM_001077365.2:c.291del	POMT1	Cas12a	Cas12a_270	9:131507361-131507386	+	CAGAATACAGTAgAACGTGCC	TTTC	TTGCTTTTCCAGAATACAGTAgAACGTGCCTGTG	-	-6	-	58.41	-	GC>G	5utr
NM_001077365.2:c.1284_1285del	POMT1	spCas9	spCas9_271	9:131518437-131518460	+	TTTTGCAGGAAATTGTGaAG	AGG	TCTTTTTGCAGGAAATTGTGaAGAGGATCT	54.23	1	26.29	-	72.36	AAC>A	exon									-0.112313
NM_001077365.2:c.1284_1285del	POMT1	saCas9	saCas9_272	9:131518435-131518462	+	CTTTTTGCAGGAAATTGTGaA	GAGGAT	TGTCTTTTTGCAGGAAATTGTGaAGAGGATCTGA	-	2	-	-	69.36	AAC>A	exon
NM_001077365.2:c.1284_1285del	POMT1	CasX	CasX_273	9:131518456-131518480	-	AGACGTCTGTGTCAGATCCT	TTCC	TGGTCTTCCAGACGTCTGTGTCAGATCCTCTtC	-	4	-	-	-	AAC>A	exon
NM_001077365.2:c.1284_1285del	POMT1	Cas12a	Cas12a_274	9:131518438-131518463	+	CAGGAAATTGTGaAGAGGATC	TTTG	GTCTTTTTGCAGGAAATTGTGaAGAGGATCTGAC	-	-6	-	40.19	-	AAC>A	exon
NM_001077365.2:c.605+1G>T	POMT1	spCas9	spCas9_275	9:131509786-131509809	+	GTCGCTTGTTCCTGTGCAGT	GGG	GGGGTCGCTTGTTCCTGTGCAGTGGGtTGA	71.38	7	67.1	-	54.34	G>T	intron									0.328962
NM_001077365.2:c.605+1G>T	POMT1	saCas9	saCas9_276	9:131509788-131509815	+	CGCTTGTTCCTGTGCAGTGGG	tTGAGT	GGTCGCTTGTTCCTGTGCAGTGGGtTGAGTTTGA	-	4	-	-	51.9	G>T	intron
NM_001077365.2:c.97C>T	POMT1	spCas9	spCas9_277	9:131504292-131504315	+	TGGGGTTACTGAGCCGGCTG	TGG	GGATGGGGTTACTGAGCCGGCTGTGGtGAC	45.28	7	51.51	-	56.56	C>T	5utr									0.0479777
NM_001077365.2:c.97C>T	POMT1	spCas9	spCas9_278	9:131504304-131504327	-	GGTAGGTGAGTCaCCACAGC	CGG	GCGGGTAGGTGAGTCaCCACAGCCGGCTCA	61.36	-5	65.18	-	66.19	C>T	5utr									0.251199
NM_001077365.2:c.1671del	POMT1	spCas9	spCas9_279	9:131520152-131520175	+	CTGGACACCAATaTGCCTAC	TGG	ACCCTGGACACCAATaTGCCTACTGGCTGC	49.5	-5	60.56	-	72.3	AT>A	exon									0.142246
NM_001077365.2:c.1671del	POMT1	spCas9	spCas9_280	9:131520158-131520181	-	GGTGCAGCCAGTAGGCAtAT	TGG	TGGGGTGCAGCCAGTAGGCAtATTGGTGTC	18.53	1	14.49	-	78.09	AT>A	exon									-0.419072
NM_001077365.2:c.1671del	POMT1	saCas9	saCas9_281	9:131520148-131520175	-	GCCAGTAGGCAtATTGGTGTC	CAGGGT	GCAGCCAGTAGGCAtATTGGTGTCCAGGGTGACC	-	-7	-	-	73.35	AT>A	exon
NM_001077365.2:c.1196del	POMT1	spCas9	spCas9_282	9:131515443-131515466	-	ACCTCCTGTGAATGGGGGCT	CgG	GAGACCTCCTGTGAATGGGGGCTCgGGGGG	31.18	5	22.76	-	68.41	CT>C	exon									-0.274387
NM_001077365.2:c.1196del	POMT1	CasX	CasX_287	9:131515420-131515444	+	AGGCATGATGTTGCAGCCCC	TTCC	TGGTTTTCCAGGCATGATGTTGCAGCCCCCcGA	-	3	-	-	-	CT>C	exon
NM_001077365.2:c.1196del	POMT1	Cas12a	Cas12a_288	9:131515419-131515444	+	CAGGCATGATGTTGCAGCCCC	TTTC	TTGGTTTTCCAGGCATGATGTTGCAGCCCCCcGA	-	5	-	60.03	-	CT>C	exon
NM_001077365.2:c.699+62del	POMT1	spCas9	spCas9_289	9:131510037-131510060	+	TGGGGCAGATGCAGATGTCA	cGG	GTATGGGGCAGATGCAGATGTCAcGGGGGT	48.74	4	60.44	-	54.61	CA>C	intron									0.142225
NM_001077365.2:c.699+62del	POMT1	saCas9	saCas9_294	9:131510037-131510064	+	TGGGGCAGATGCAGATGTCAc	GGGGGT	GTATGGGGCAGATGCAGATGTCAcGGGGGTACTT	-	3	-	-	54.83	CA>C	intron
NM_001077365.2:c.699+62del	POMT1	CasX	CasX_295	9:131510049-131510073	-	CCAAGTACCCCCgTGACATC	TTCA	GTCTTTTCACCAAGTACCCCCgTGACATCTGCA	-	-7	-	-	-	CA>C	intron
NM_001077365.2:c.699+62del	POMT1	Cas12a	Cas12a_296	9:131510049-131510074	-	ACCAAGTACCCCCgTGACATC	TTTC	AGTCTTTTCACCAAGTACCCCCgTGACATCTGCA	-	-5	-	55.67	-	CA>C	intron
NM_001077365.2:c.414del	POMT1	CasX	CasX_297	9:131507471-131507495	+	CATTGTGCCGCCATGGGAGC	TTCT	CACTTTTCTCATTGTGCCGCCATGGGAGCTGCT	-	7	-	-	-	TG>T	exon
NM_001077365.2:c.605+1G>C	POMT1	spCas9	spCas9_298	9:131509786-131509809	+	GTCGCTTGTTCCTGTGCAGT	GGG	GGGGTCGCTTGTTCCTGTGCAGTGGGcTGA	71.38	7	69.16	-	58.54	G>C	intron									0.344638
NM_001077365.2:c.605+1G>C	POMT1	saCas9	saCas9_299	9:131509788-131509815	+	CGCTTGTTCCTGTGCAGTGGG	cTGAGT	GGTCGCTTGTTCCTGTGCAGTGGGcTGAGTTTGA	-	4	-	-	56.17	G>C	intron
NM_001077365.2:c.2144_2147dup	POMT1	spCas9	spCas9_300	9:131523048-131523071	+	ATGAACTCAAGGCCCTTCGC	Tgg	CACATGAACTCAAGGCCCTTCGCTggaaaG	52.67	5	59.41	-	76.67	G>GGAAA	exon									0.149908
NM_001077365.2:c.2144_2147dup	POMT1	spCas9	spCas9_302	9:131523060-131523083	-	CTGTCTTTCCtttccAGCGA	AGG	CAGCTGTCTTTCCtttccAGCGAAGGGCCT	47.72	-3	12.05	-	73.87	G>GGAAA	exon									-0.267894
NM_001077365.2:c.1000C>T	POMT1	spCas9	spCas9_304	9:131512036-131512059	+	CACAGATATGAGAACGGCtG	AGG	TCACACAGATATGAGAACGGCtGAGGCAGC	65.68	2	57.75	-	65.61	C>T	exon									0.215373
NM_001077365.2:c.1000C>T	POMT1	CasX	CasX_305	9:131512032-131512056	+	CACAGATATGAGAACGGCtG	TTCA	TTGACTTCACACAGATATGAGAACGGCtGAGGC	-	-1	-	-	-	C>T	exon
NM_001077365.2:c.699+67G>A	POMT1	spCas9	spCas9_306	9:131510040-131510063	+	GGCAGATGCAGATGTCACAG	GGG	TGGGGCAGATGCAGATGTCACAGGGGaTAC	70.74	7	72.4	-	54.2	G>A	intron									0.368903
NM_001077365.2:c.1478dup	POMT1	spCas9	spCas9_308	9:131518932-131518955	+	CGTGGAGGAGCACCGAtaTA	CGG	GAACGTGGAGGAGCACCGAtaTACGGCGCG	42.08	-1	34.45	-	74.83	T>TA	exon									-0.116649
NM_001077365.2:c.1478dup	POMT1	spCas9	spCas9_309	9:131518943-131518966	-	GACTCACTCGCGCCGTAtaT	CGG	GCGGACTCACTCGCGCCGTAtaTCGGTGCT	32.35	2	7.82	-	73.87	T>TA	exon									-0.392213
NM_001077365.2:c.1478dup	POMT1	saCas9	saCas9_310	9:131518935-131518962	+	GGAGGAGCACCGAtaTACGGC	GCGAGT	CGTGGAGGAGCACCGAtaTACGGCGCGAGTGAGT	-	-5	-	-	73.93	T>TA	exon
NM_001077365.2:c.859_871del	POMT1	spCas9	spCas9_311	9:131511315-131511338	+	CAACCTTCTGCTTCTGTCTC	AgG	CATCAACCTTCTGCTTCTGTCTCAgGGATC	44.32	5	29.48	-	56.74	GGGAGGACTAGCTC>G	exon									-0.139001
NM_001077365.2:c.859_871del	POMT1	saCas9	saCas9_314	9:131511314-131511341	+	TCAACCTTCTGCTTCTGTCTC	AgGGAT	TCATCAACCTTCTGCTTCTGTCTCAgGGATCACT	-	5	-	-	58.59	GGGAGGACTAGCTC>G	exon
NM_001077365.2:c.859_871del	POMT1	CasX	CasX_316	9:131511320-131511344	+	GCTTCTGTCTCAgGGATCAC	TTCT	CAACCTTCTGCTTCTGTCTCAgGGATCACTCAG	-	-7	-	-	-	GGGAGGACTAGCTC>G	exon
NM_001077365.2:c.427+1_427+2insA	POMT1	spCas9	spCas9_317	9:131507493-131507516	+	GCTGCTCTGTTGATGCTTAT	CGg	GGAGCTGCTCTGTTGATGCTTATCGgaGTA	26.93	6	7.45	-	61.17	G>GA	intron									-0.422949
NM_001077365.2:c.427+1_427+2insA	POMT1	saCas9	saCas9_318	9:131507492-131507519	+	AGCTGCTCTGTTGATGCTTAT	CGgaGT	GGGAGCTGCTCTGTTGATGCTTATCGgaGTAAGA	-	6	-	-	60.28	G>GA	intron
NM_001077365.2:c.986+1G>A	POMT1	spCas9	spCas9_319	9:131511451-131511474	+	GACACCTACCCCATGATaTA	AGG	CAGGACACCTACCCCATGATaTAAGGTGAT	45.08	1	19.38	-	69.3	G>A	intron									-0.221539
NM_001077365.2:c.986+1G>A	POMT1	spCas9	spCas9_321	9:131511460-131511483	-	AAAACCATCACCTTAtATCA	TGG	AGTAAAACCATCACCTTAtATCATGGGGTA	50.94	-2	34.93	-	66.27	G>A	intron									-0.0584967
NM_001077365.2:c.986+1G>A	POMT1	saCas9	saCas9_324	9:131511457-131511484	-	TAAAACCATCACCTTAtATCA	TGGGGT	AAGTAAAACCATCACCTTAtATCATGGGGTAGGT	-	-2	-	-	63.59	G>A	intron
NM_001077365.2:c.986+1G>A	POMT1	CasX	CasX_325	9:131511441-131511465	+	CACCAGGACACCTACCCCAT	TTCC	CTTCATTCCCACCAGGACACCTACCCCATGATa	-	5	-	-	-	G>A	intron
NM_001077365.2:c.986+1G>A	POMT1	CasX	CasX_326	9:131511467-131511491	-	AAGTAAAACCATCACCTTAt	TTCA	TTATCTTCAAAGTAAAACCATCACCTTAtATCA	-	1	-	-	-	G>A	intron
NM_001077365.2:c.633C>A	POMT1	saCas9	saCas9_327	9:131509919-131509946	+	GTGTTCACGTAaGTGCTCGTG	CTGGGT	GGTGTGTTCACGTAaGTGCTCGTGCTGGGTGTTG	-	-7	-	-	72.13	C>A	exon
NM_001077365.2:c.1175+3del	POMT1	spCas9	spCas9_328	9:131513322-131513345	-	GGCGGGCACACTaCGTGTTC	AGG	GACGGCGGGCACACTaCGTGTTCAGGGAGC	53	-5	30.28	-	64.96	TG>T	intron									-0.084377
NM_001077365.2:c.270_280delAATTGGAGCAG	POMT1	spCas9	spCas9_330	9:131506421-131506444	+	ATGGCAATTTTTTGTGGAaC	AGG	TCGATGGCAATTTTTTGTGGAaCAGGTAAA	54.8	2	11.07	-	74.85	ACAGAATTGGAG>A	5utr									-0.235032
NM_001077365.2:c.270_280delAATTGGAGCAG	POMT1	CasX	CasX_331	9:131506417-131506441	+	ATGGCAATTTTTTGTGGAaC	TTCG	GAGGATTCGATGGCAATTTTTTGTGGAaCAGGT	-	-1	-	-	-	ACAGAATTGGAG>A	5utr
NM_001077365.2:c.1175C>T	POMT1	spCas9	spCas9_332	9:131513322-131513345	-	GCGGGCACACTCACaTGTTC	AGG	ACGGCGGGCACACTCACaTGTTCAGGGAGC	52.93	-3	44.89	-	65.57	C>T	exon									0.0352876
NM_001077365.2:c.1175C>T	POMT1	saCas9	saCas9_334	9:131513311-131513338	+	GACCACCCGCTCCCTGAACAt	GTGAGT	CATGACCACCCGCTCCCTGAACAtGTGAGTGTGC	-	3	-	-	59.19	C>T	exon
NM_001077365.2:c.430A>G	POMT1	spCas9	spCas9_335	9:131508891-131508914	+	GTGTTTCCTCTTTGAAACAG	AGg	CATGTGTTTCCTCTTTGAAACAGAGgATGC	60.43	6	25.01	-	64.19	A>G	exon									-0.0842553
NM_001077365.2:c.430A>G	POMT1	saCas9	saCas9_336	9:131508889-131508916	+	ATGTGTTTCCTCTTTGAAACA	GAGgAT	GACATGTGTTTCCTCTTTGAAACAGAGgATGCTC	-	7	-	-	60.6	A>G	exon
NM_001077365.2:c.430A>G	POMT1	CasX	CasX_337	9:131508895-131508919	+	TCTTTGAAACAGAGgATGCT	TTCC	TGTGTTTCCTCTTTGAAACAGAGgATGCTCTCA	-	-5	-	-	-	A>G	exon
NM_001077365.2:c.430A>G	POMT1	Cas12a	Cas12a_338	9:131508894-131508919	+	CTCTTTGAAACAGAGgATGCT	TTTC	ATGTGTTTCCTCTTTGAAACAGAGgATGCTCTCA	-	-3	-	43.02	-	A>G	exon
NM_001077365.2:c.1298_1299del	POMT1	spCas9	spCas9_339	9:131518456-131518479	+	CAGAGGATCTgACAGACGTC	TGG	GAACAGAGGATCTgACAGACGTCTGGAAGA	58.4	-7	58.1	-	67.81	GAC>G	exon									0.175192
NM_001077365.2:c.1298_1299del	POMT1	Cas12a	Cas12a_340	9:131518438-131518463	+	CAGGAAATTGTGAACAGAGGA	TTTG	GTCTTTTTGCAGGAAATTGTGAACAGAGGATCTg	-	7	-	46.03	-	GAC>G	exon
NM_001077365.2:c.978C>A	POMT1	spCas9	spCas9_341	9:131511459-131511482	-	AAACCATCACCTTACATCAT	GGG	GTAAAACCATCACCTTACATCATGGGtTAG	55.74	7	41.11	-	75.42	C>A	exon									0.0175344
NM_001077365.2:c.978C>A	POMT1	CasX	CasX_344	9:131511437-131511461	+	TTCCCACCAGGACACCTAaC	TTCA	CTGGCTTCATTCCCACCAGGACACCTAaCCCAT	-	-1	-	-	-	C>A	exon
NM_001077365.2:c.606del	POMT1	saCas9	saCas9_346	9:131509891-131509918	+	ATGTCTTTGCAgATCAAGTAC	ATGGGT	GTCATGTCTTTGCAgATCAAGTACATGGGTGTGT	-	-7	-	-	49.87	GC>G	exon
NM_001077365.2:c.606del	POMT1	CasX	CasX_347	9:131509884-131509908	+	GTCATGTCTTTGCAgATCAA	TTCT	TCCATTTCTGTCATGTCTTTGCAgATCAAGTAC	-	-5	-	-	-	GC>G	exon
NM_001077365.2:c.606del	POMT1	Cas12a	Cas12a_348	9:131509883-131509908	+	TGTCATGTCTTTGCAgATCAA	TTTC	CTCCATTTCTGTCATGTCTTTGCAgATCAAGTAC	-	-3	-	41.03	-	GC>G	exon
NM_001077365.2:c.313C>T	POMT1	spCas9	spCas9_349	9:131507395-131507418	-	CGAGTGCTGGCAGCAGGCaC	AGG	CCGCGAGTGCTGGCAGCAGGCaCAGGGACC	63.3	2	69.71	-	71.98	C>T	5utr									0.298018
NM_001077365.2:c.1204dup	POMT1	spCas9	spCas9_351	9:131515443-131515466	-	TCCTGTGAATGGGGGCgcTC	AGG	ACCTCCTGTGAATGGGGGCgcTCAGGGGGG	33.46	1	40.43	-	60.44	G>GC	exon									-0.113236
NM_001077365.2:c.1204dup	POMT1	CasX	CasX_356	9:131515420-131515444	+	AGGCATGATGTTGCAGCCCC	TTCC	TGGTTTTCCAGGCATGATGTTGCAGCCCCCCTG	-	7	-	-	-	G>GC	exon
NM_001077365.2:c.1255C>T	POMT1	spCas9	spCas9_357	9:131515494-131515517	+	CCATGCCCGCCtAGAACCTC	TGG	TCTCCATGCCCGCCtAGAACCTCTGGAGAC	47.95	-6	37	-	60.54	C>T	exon									-0.0571227
NM_001077365.2:c.1255C>T	POMT1	spCas9	spCas9_358	9:131515502-131515525	-	CACCAGTCTCCAGAGGTTCT	aGG	ACTCACCAGTCTCCAGAGGTTCTaGGCGGG	35.1	4	24.73	-	68.08	C>T	exon									-0.235244
NM_001077365.2:c.727C>T	POMT1	spCas9	spCas9_362	9:131510274-131510297	+	TCACTTGCTCGCCtGAGCAG	TGG	CTGTCACTTGCTCGCCtGAGCAGTGGCTTT	46.55	-4	28.31	-	63.77	C>T	exon									-0.137789
NM_001077365.2:c.727C>T	POMT1	spCas9	spCas9_363	9:131510284-131510307	-	GACCAGCAAAGCCACTGCTC	aGG	GATGACCAGCAAAGCCACTGCTCaGGCGAG	53.06	4	50.37	-	53.45	C>T	exon									0.0848456
NM_001077365.2:c.727C>T	POMT1	CasX	CasX_364	9:131510269-131510293	+	GTCACTTGCTCGCCtGAGCA	TTCT	GTGTGTTCTGTCACTTGCTCGCCtGAGCAGTGG	-	-5	-	-	-	C>T	exon
NM_001077365.2:c.110_113dup	POMT1	spCas9	spCas9_365	9:131504315-131504338	+	CGACTCACCTACccgcgCCG	CGG	TGGCGACTCACCTACccgcgCCGCGGGCTG	47.07	-5	58.95	-	59.78	C>CCGCG	5utr									0.11866
NM_001077365.2:c.110_113dup	POMT1	spCas9	spCas9_367	9:131504326-131504349	-	TTACACCACAGCCCGCGGcg	cgg	AGCTTACACCACAGCCCGCGGcgcggGTAG	49.16	6	58.17	-	54.53	C>CCGCG	5utr									0.12601
NM_001077365.2:c.110_113dup	POMT1	saCas9	saCas9_370	9:131504324-131504351	-	GCTTACACCACAGCCCGCGGc	gcggGT	TTAGCTTACACCACAGCCCGCGGcgcggGTAGGT	-	7	-	-	61.88	C>CCGCG	5utr
NM_001077365.2:c.110_113dup	POMT1	Cas12a	Cas12a_372	9:131504330-131504355	-	GCTTACACCACAGCCCGCGGc	TTTA	AGTCATTTAGCTTACACCACAGCCCGCGGcgcgg	-	7	-	32.76	-	C>CCGCG	5utr
NM_001077365.2:c.1087C>T	POMT1	spCas9	spCas9_373	9:131513227-131513250	+	TGTGTCTTCCAGGCACtAGC	TGG	CACTGTGTCTTCCAGGCACtAGCTGGTGGT	39.47	-1	38.48	-	68.74	C>T	exon									-0.0968194
NM_001077365.2:c.1087C>T	POMT1	spCas9	spCas9_375	9:131513234-131513257	-	GCTCACCACCAGCTaGTGCC	TGG	GCTGCTCACCACCAGCTaGTGCCTGGAAGA	53.5	-3	57.62	-	70.48	C>T	exon									0.141894
NM_021619.3:c.303del	PRDM12	spCas9	spCas9_376	9:130666664-130666687	+	TCCATCCCTGGCGAGGGCCT	CGg	AGCTCCATCCCTGGCGAGGGCCTCGgATCT	37.03	6	30.77	-	59.89	GC>G	exon									-0.171793
NM_021619.3:c.303del	PRDM12	spCas9	spCas9_377	9:130666680-130666703	-	CACGTCTTGGAGAAGATcCG	AGG	ATCCACGTCTTGGAGAAGATcCGAGGCCCT	68.97	1	68.58	-	67.69	GC>G	exon									0.323041
NM_021619.3:c.303del	PRDM12	saCas9	saCas9_378	9:130666662-130666689	+	GCTCCATCCCTGGCGAGGGCC	TCGgAT	AGAGCTCCATCCCTGGCGAGGGCCTCGgATCTTC	-	7	-	-	65.33	GC>G	exon
NM_021619.3:c.514G>T	PRDM12	spCas9	spCas9_379	9:130668247-130668270	+	TAACGAACAGtAGCAGAACC	TGG	ACGTAACGAACAGtAGCAGAACCTGGAGGT	62.24	-7	69.32	-	53.51	G>T	exon									0.294265
NM_021619.3:c.224-1G>A	PRDM12	spCas9	spCas9_380	9:130666601-130666624	-	GGACAGCTTCTGCACTTtTG	CGG	GCTGGACAGCTTCTGCACTTtTGCGGCGGC	20.4	1	18.79	-	69.09	G>A	exon									-0.370045
NM_021619.3:c.224-1G>A	PRDM12	CasX	CasX_384	9:130666587-130666611	+	TGGCCCCGCCGCCGCAaAAG	TTCC	CGGTTTTCCTGGCCCCGCCGCCGCAaAAGTGCA	-	-3	-	-	-	G>A	exon
NM_021619.3:c.224-1G>A	PRDM12	Cas12a	Cas12a_385	9:130666586-130666611	+	CTGGCCCCGCCGCCGCAaAAG	TTTC	CCGGTTTTCCTGGCCCCGCCGCCGCAaAAGTGCA	-	-1	-	35.82	-	G>A	exon
NM_021619.3:c.578dup	PRDM12	spCas9	spCas9_386	9:130678521-130678544	-	TCAGGTGGGAgaTCATCTGC	AGG	TGGTCAGGTGGGAgaTCATCTGCAGGGAAG	67.89	-6	74.46	-	61.06	T>TC	exon									0.367173
NM_021619.3:c.578dup	PRDM12	CasX	CasX_388	9:130678516-130678540	+	TCCCTGCAGATGAtcTCCCA	TTCT	TTGCCTTCTTCCCTGCAGATGAtcTCCCACCTG	-	-6	-	-	-	T>TC	exon
NM_021619.3:c.578dup	PRDM12	CasX	CasX_389	9:130678527-130678551	-	TGGTCAGGTGGGAgaTCATC	TTCC	AGCAGTTCCTGGTCAGGTGGGAgaTCATCTGCA	-	-5	-	-	-	T>TC	exon
NM_021619.3:c.305T>A	PRDM12	spCas9	spCas9_390	9:130666680-130666703	-	ACGTCTTGGAGAAGtTGCCG	AGG	TCCACGTCTTGGAGAAGtTGCCGAGGCCCT	66.19	-3	59.08	-	68.31	T>A	exon									0.228468
NM_021619.3:c.305T>A	PRDM12	CasX	CasX_391	9:130666694-130666718	-	CGCCTTGATCCACGTCTTGG	TTCC	CTCGGTTCCCGCCTTGATCCACGTCTTGGAGAA	-	7	-	-	-	T>A	exon
NM_021619.3:c.91G>T	PRDM12	spCas9	spCas9_392	9:130664741-130664764	-	CAGGAAGCTGTGCAGGATGT	aGG	GTACAGGAAGCTGTGCAGGATGTaGGAGGT	41.17	4	48.27	-	60.66	G>T	exon									-0.0038739
NM_021619.3:c.516G>C	PRDM12	spCas9	spCas9_394	9:130668247-130668270	+	TAACGAACAGGAcCAGAACC	TGG	ACGTAACGAACAGGAcCAGAACCTGGAGGT	64.15	-5	68.98	-	55.54	G>C	exon									0.30197
NM_021619.3:c.516G>C	PRDM12	spCas9	spCas9_395	9:130668258-130668281	-	TCTGGACCACCTCCAGGTTC	TGg	CGATCTGGACCACCTCCAGGTTCTGgTCCT	34.01	6	33.71	-	59.17	G>C	exon									-0.16496
NM_021619.3:c.866A>T	PRDM12	spCas9	spCas9_396	9:130681428-130681451	-	CGCCCGTGTGCAGGCGCACG	aGG	GCTCGCCCGTGTGCAGGCGCACGaGGTTGC	52.88	4	59.7	-	60.51	A>T	exon									0.158443
NM_021619.3:c.866A>T	PRDM12	CasX	CasX_397	9:130681403-130681427	+	GCCAGTCGTCCACGCTGCGC	TTCA	GCCGCTTCAGCCAGTCGTCCACGCTGCGCAACC	-	6	-	-	-	A>T	exon
NM_021619.3:c.131_138del	PRDM12	spCas9	spCas9_398	9:130664762-130664785	+	CTGTACGGCCGCTGGCGCAA	cGG	TTCCTGTACGGCCGCTGGCGCAAcGGAGCA	27.75	4	30.45	-	61.38	CGTGCTCGG>C	exon									-0.22892
NM_021619.3:c.131_138del	PRDM12	spCas9	spCas9_399	9:130664769-130664792	-	GAGCTGCTCCgTTGCGCCAG	CGG	GAAGAGCTGCTCCgTTGCGCCAGCGGCCGT	27.42	-7	30.95	-	84.04	CGTGCTCGG>C	exon									-0.233632
NM_021619.3:c.131_138del	PRDM12	CasX	CasX_400	9:130664759-130664783	+	TGTACGGCCGCTGGCGCAAc	TTCC	ACAGCTTCCTGTACGGCCGCTGGCGCAAcGGAG	-	1	-	-	-	CGTGCTCGG>C	exon
NM_021619.3:c.785T>G	PRDM12	spCas9	spCas9_401	9:130681329-130681352	+	GCAGCAACCTGCGCTCGCAC	AgG	CGCGCAGCAACCTGCGCTCGCACAgGCGCA	50.25	5	60.37	-	51.29	T>G	exon									0.151453
NM_002732.4:c.222C>G	PRKACG	spCas9	spCas9_402	9:69013859-69013882	+	CTGCTTGTTGAGcATCTTCA	TGG	CTTCTGCTTGTTGAGcATCTTCATGGCGTA	40.11	-5	23.7	-	28.44	C>G	exon									-0.202467
NM_002732.4:c.222C>G	PRKACG	CasX	CasX_403	9:69013842-69013866	+	TCTTCACCACCTTCTGCTTG	TTCA	CCTGCTTCATCTTCACCACCTTCTGCTTGTTGA	-	7	-	-	-	C>G	exon
NM_058179.4:c.510_514del	PSAT1	spCas9	spCas9_405	9:78306402-78306425	+	TGACTTTATACCCGATGTCA	AGg	GTTTGACTTTATACCCGATGTCAAGgGTAC	56.43	6	57.99	-	57.66	GGAGCA>G	exon									0.165908
NM_058179.4:c.510_514del	PSAT1	spCas9	spCas9_408	9:78306412-78306435	-	CAAACCAGTACcCTTGACAT	CGG	TCACAAACCAGTACcCTTGACATCGGGTAT	54.96	-6	39.48	-	62.92	GGAGCA>G	exon									0.00338522
NM_058179.4:c.510_514del	PSAT1	saCas9	saCas9_410	9:78306400-78306427	+	TTTGACTTTATACCCGATGTC	AAGgGT	GAGTTTGACTTTATACCCGATGTCAAGgGTACTG	-	7	-	-	60.03	GGAGCA>G	exon
NM_058179.4:c.510_514del	PSAT1	saCas9	saCas9_411	9:78306410-78306437	-	CACAAACCAGTACcCTTGACA	TCGGGT	TGTCACAAACCAGTACcCTTGACATCGGGTATAA	-	-5	-	-	62.48	GGAGCA>G	exon
NM_058179.4:c.510_514del	PSAT1	Cas12a	Cas12a_412	9:78306400-78306425	+	ACTTTATACCCGATGTCAAGg	TTTG	TGGAGTTTGACTTTATACCCGATGTCAAGgGTAC	-	3	-	37.51	-	GGAGCA>G	exon
NM_058179.4:c.510_514del	PSAT1	Cas12a	Cas12a_414	9:78306425-78306450	-	AGGACATGTCACAAACCAGTA	TTTG	GGAAGTTTGAGGACATGTCACAAACCAGTACcCT	-	5	-	80.85	-	GGAGCA>G	exon
NM_058179.4:c.296C>T	PSAT1	spCas9	spCas9_415	9:78304828-78304851	+	AGGAAGGTGTGtTGACTATG	TGG	AGCAGGAAGGTGTGtTGACTATGTGGTGAC	52.88	-6	59.92	-	72.66	C>T	exon									0.156551
NM_058179.4:c.536C>T	PSAT1	spCas9	spCas9_416	9:78306448-78306471	-	TGGCTTGGACAGGAAGTTTa	AGG	CACTGGCTTGGACAGGAAGTTTaAGGACAT	31.56	3	29.65	-	63	C>T	exon									-0.213812
NM_058179.4:c.536C>T	PSAT1	Cas12a	Cas12a_417	9:78306437-78306462	+	TGACATGTCCTtAAACTTCCT	TTTG	ACTGGTTTGTGACATGTCCTtAAACTTCCTGTCC	-	-7	-	57.67	-	C>T	exon
NM_058179.4:c.1023_1027delinsAGACCT	PSAT1	spCas9	spCas9_418	9:78328983-78329006	+	CTGTGGGAGGCATagacctC	CGG	GGTCTGTGGGAGGCATagacctCCGGGCCT	47.42	-4	40.98	-	70.43	CCGGG>AGACCT	exon									-0.0304629
NM_058179.4:c.1023_1027delinsAGACCT	PSAT1	CasX	CasX_420	9:78328975-78328999	+	AGGTCTGTGGGAGGCATaga	TTCT	GGTCATTCTAGGTCTGTGGGAGGCATagacctC	-	-2	-	-	-	CCGGG>AGACCT	exon
NM_058179.4:c.296_297delinsTG	PSAT1	spCas9	spCas9_421	9:78304819-78304842	+	CTTGAAAGCAGGAAGGTGTG	tgG	TGGCTTGAAAGCAGGAAGGTGTGtgGACTA	64.09	4	48.44	-	62.16	CT>TG	exon									0.130533
NM_058179.4:c.299A>C	PSAT1	spCas9	spCas9_423	9:78304828-78304851	+	AGGAAGGTGTGCTGcCTATG	TGG	AGCAGGAAGGTGTGCTGcCTATGTGGTGAC	45.67	-3	57.34	-	65.85	A>C	exon									0.0954054
NM_058179.4:c.299A>C	PSAT1	spCas9	spCas9_424	9:78304841-78304864	-	CCAAGCTCCTGTCACCACAT	AGg	TGACCAAGCTCCTGTCACCACATAGgCAGC	44.87	6	36.13	-	58.46	A>C	exon									-0.081585
NM_058179.4:c.76C>T	PSAT1	spCas9	spCas9_425	9:78300601-78300624	+	GGTGTTGTTAGAGATAtAAA	AGG	CTAGGTGTTGTTAGAGATAtAAAAGGAATT	32.35	-1	41.84	-	45.42	C>T	exon									-0.103515
NM_058179.4:c.76C>T	PSAT1	saCas9	saCas9_426	9:78300600-78300627	+	AGGTGTTGTTAGAGATAtAAA	AGGAAT	TCTAGGTGTTGTTAGAGATAtAAAAGGAATTATT	-	-1	-	-	52.59	C>T	exon
NM_058179.4:c.76C>T	PSAT1	CasX	CasX_427	9:78300596-78300620	+	AGGTGTTGTTAGAGATAtAA	TTCT	TTTTTTTCTAGGTGTTGTTAGAGATAtAAAAGG	-	-2	-	-	-	C>T	exon
NM_058179.4:c.76C>T	PSAT1	Cas12a	Cas12a_428	9:78300595-78300620	+	TAGGTGTTGTTAGAGATAtAA	TTTC	ATTTTTTTCTAGGTGTTGTTAGAGATAtAAAAGG	-	1	-	39.09	-	C>T	exon
NM_058179.4:c.76C>T	PSAT1	Cas12a	Cas12a_429	9:78300615-78300640	-	TAGTCTAATAATTCCTTTTaT	TTTG	ACTCCTTTGTAGTCTAATAATTCCTTTTaTATCT	-	2	-	47.73	-	C>T	exon
NM_000238.4:c.2748_2766del	KCNH2	spCas9	spCas9_0	7:150947782-150947805	+	CTCTCCCCCCACGGCCCCCC	CGg	GGGCTCTCCCCCCACGGCCCCCCCGgCCTG	35.16	6	39.3	-	64.25	CGGCCGGGGCCGATGAGCCG>C	exon									-0.113799
NM_000238.4:c.2748_2766del	KCNH2	spCas9	spCas9_1	7:150947804-150947827	-	GGGCCGGGCCGGGCGGGGGC	AGG	TTGGGGCCGGGCCGGGCGGGGGCAGGcCGG	26.9	7	4.69	-	64.82	CGGCCGGGGCCGATGAGCCG>C	exon									-0.446954
NM_000238.4:c.2698dup	KCNH2	spCas9	spCas9_8	7:150947862-150947885	-	CACAGACACGGAgaGCAGCC	AGG	TCCCACAGACACGGAgaGCAGCCAGGGGAG	59.68	-4	57	-	71.36	A>AG	exon									0.172509
NM_000238.4:c.2698dup	KCNH2	CasX	CasX_11	7:150947873-150947897	-	CTGTTTCCCACAGACACGGA	TTCT	GCCCATTCTCTGTTTCCCACAGACACGGAgaGC	-	3	-	-	-	A>AG	exon
NM_000238.4:c.2698dup	KCNH2	Cas12a	Cas12a_13	7:150947865-150947890	-	CCACAGACACGGAgaGCAGCC	TTTC	CTCTGTTTCCCACAGACACGGAgaGCAGCCAGGG	-	-4	-	57.9	-	A>AG	exon
NM_000238.4:c.1707C>G	KCNH2	spCas9	spCas9_14	7:150951684-150951707	-	CTGGCTAGCCTGCATCTGGT	AgG	GCACTGGCTAGCCTGCATCTGGTAgGCCAT	45.62	5	56.09	-	64.68	C>G	exon									0.0851818
NM_000238.4:c.1933A>C	KCNH2	spCas9	spCas9_16	7:150951439-150951462	+	CACACTCACAGCCAATGAGC	AgG	GGGCACACTCACAGCCAATGAGCAgGACGC	65.28	5	62.72	-	75.48	A>C	exon									0.250945
NM_000238.4:c.1933A>C	KCNH2	spCas9	spCas9_18	7:150951449-150951472	-	TCCATCTGCGTCcTGCTCAT	TGG	TTCTCCATCTGCGTCcTGCTCATTGGCTGT	29.91	-5	11.72	-	56.27	A>C	exon									-0.368955
NM_000238.4:c.95C>T	KCNH2	spCas9	spCas9_19	7:150974912-150974935	-	AGTTCATCATCGtCAACGCT	CGG	GTAAGTTCATCATCGtCAACGCTCGGGTGG	52.4	-5	48.31	-	58.54	C>T	5utr									0.0624947
NM_000238.4:c.95C>T	KCNH2	saCas9	saCas9_21	7:150974910-150974937	-	TAAGTTCATCATCGtCAACGC	TCGGGT	CCGTAAGTTCATCATCGtCAACGCTCGGGTGGAG	-	-4	-	-	50.57	C>T	5utr
NM_000238.4:c.95C>T	KCNH2	CasX	CasX_22	7:150974905-150974929	+	CCACCCGAGCGTTGaCGATG	TTCT	CGCAGTTCTCCACCCGAGCGTTGaCGATGATGA	-	-5	-	-	-	C>T	5utr
NM_000238.4:c.2156dup	KCNH2	saCas9	saCas9_23	7:150950398-150950425	-	CAGGTGCTGAAGGGCgcTTCC	CTGAGT	CCCCAGGTGCTGAAGGGCgcTTCCCTGAGTGCCT	-	-2	-	-	68.39	C>CG	exon
NM_000238.4:c.2966-3C>G	KCNH2	spCas9	spCas9_24	7:150947516-150947539	-	ACCCAGCTCTGCTCTCTGGC	TGg	CTCACCCAGCTCTGCTCTCTGGCTGgAGGC	29.44	6	42.42	-	73.5	C>G	intron									-0.124245
NM_000238.4:c.2304_2305dup	KCNH2	spCas9	spCas9_26	7:150950257-150950280	-	ACCGCCAGGGGACACACTac	tGG	TGCACCGCCAGGGGACACACTactGGTGCA	50.2	4	30.72	-	67.5	T>TCA	exon									-0.0978341
NM_000238.4:c.2376dup	KCNH2	spCas9	spCas9_28	7:150950179-150950202	+	ACGACGACGTcgCGCCCCGC	AGG	GCCACGACGACGTcgCGCCCCGCAGGATCT	57.07	-7	45	-	70.69	G>GC	exon									0.0587401
NM_000238.4:c.2376dup	KCNH2	spCas9	spCas9_29	7:150950176-150950199	-	TGCGGGGCGcgACGTCGTCG	TGG	TCCTGCGGGGCGcgACGTCGTCGTGGCCAT	47.92	-7	67.42	-	80.69	G>GC	exon									0.186955
NM_000238.4:c.2376dup	KCNH2	saCas9	saCas9_30	7:150950177-150950204	+	CCACGACGACGTcgCGCCCCG	CAGGAT	TGGCCACGACGACGTcgCGCCCCGCAGGATCTCG	-	-6	-	-	71.09	G>GC	exon
NM_000238.4:c.3105_3109dup	KCNH2	spCas9	spCas9_31	7:150947364-150947387	-	GCCCCGGGGCGAgggcgaCG	TGG	GCGGCCCCGGGGCGAgggcgaCGTGGAGAG	40.37	1	35.67	-	73.17	A>AGCGGG	exon									-0.116059
NM_000238.4:c.3208C>T	KCNH2	spCas9	spCas9_32	7:150946999-150947022	-	CTGTCCTGCAGCTGCTACAG	AGG	CCACTGTCCTGCAGCTGCTACAGAGGtAGA	59.71	7	48.44	-	52.09	C>T	exon									0.108097
NM_000238.4:c.2567dup	KCNH2	spCas9	spCas9_34	7:150948863-150948886	+	AGGTTGAAGGTGATCTCcaC	AGG	CGCAGGTTGAAGGTGATCTCcaCAGGCTGG	71.58	1	66.1	-	61.17	G>GT	exon									0.319813
NM_000238.4:c.2567dup	KCNH2	spCas9	spCas9_36	7:150948878-150948901	-	ACCACTTCTGGTCCAGCCTG	tgG	CCGACCACTTCTGGTCCAGCCTGtgGAGAT	48.04	5	34.84	-	69.44	G>GT	exon									-0.0770906
NM_000238.4:c.2567dup	KCNH2	CasX	CasX_37	7:150948884-150948908	-	CCGACCACTTCTGGTCCAGC	TTCT	CTGAGTTCTCCGACCACTTCTGGTCCAGCCTGt	-	6	-	-	-	G>GT	exon
NM_000238.4:c.2118_2121dup	KCNH2	spCas9	spCas9_39	7:150950921-150950944	+	CGCGTTCATGTCGATGCCGT	TGG	CACCGCGTTCATGTCGATGCCGTTGGtgta	40.48	7	34.62	-	63.42	A>ACATC	exon									-0.121089
NM_000238.4:c.2118_2121dup	KCNH2	spCas9	spCas9_41	7:150950936-150950959	-	CTGGTCCTACActacaCCAA	CGG	CGCCTGGTCCTACActacaCCAACGGCATC	47.63	-2	56.75	-	88.73	A>ACATC	exon									0.0949888
NM_000238.4:c.2118_2121dup	KCNH2	CasX	CasX_42	7:150950925-150950949	+	TGTCGATGCCGTTGGtgtag	TTCA	CCGCGTTCATGTCGATGCCGTTGGtgtagTGTA	-	-4	-	-	-	A>ACATC	exon
NM_000238.4:c.2118_2121dup	KCNH2	CasX	CasX_43	7:150950946-150950970	-	AGCACGCCTGGTCCTACAct	TTCC	AGTACTTCCAGCACGCCTGGTCCTACActacaC	-	4	-	-	-	A>ACATC	exon
NM_000238.4:c.774_780del	KCNH2	spCas9	spCas9_44	7:150958174-150958197	+	CAGGCTGCAGCTGGAGCCCG	aGG	GGCCAGGCTGCAGCTGGAGCCCGaGGGTTG	58.5	4	66.59	-	61.9	TCCGCAGC>T	exon									0.247458
NM_000238.4:c.774_780del	KCNH2	spCas9	spCas9_47	7:150958190-150958213	-	GGGCGCACAGCCTCAACCCt	CGG	CCCGGGCGCACAGCCTCAACCCtCGGGCTC	44.89	3	44.58	-	64.94	TCCGCAGC>T	exon									-0.0138897
NM_000238.4:c.774_780del	KCNH2	saCas9	saCas9_49	7:150958172-150958199	+	GCCAGGCTGCAGCTGGAGCCC	GaGGGT	CGGGCCAGGCTGCAGCTGGAGCCCGaGGGTTGAG	-	5	-	-	62.74	TCCGCAGC>T	exon
NM_000238.4:c.1326_1347del	KCNH2	spCas9	spCas9_50	7:150952613-150952636	+	GGTCCACCACAGCCAGCGGC	TgG	TGAGGTCCACCACAGCCAGCGGCTgGCAGG	51.01	5	55.98	-	57.53	CCGTCCGCATCGGTGTGAGCCAT>C	exon									0.117842
NM_000238.4:c.1326_1347del	KCNH2	spCas9	spCas9_54	7:150952624-150952647	-	AAGGCCCGCCTGCcAGCCGC	TGG	AAGAAGGCCCGCCTGCcAGCCGCTGGCTGT	51.15	-4	49.85	-	80.37	CCGTCCGCATCGGTGTGAGCCAT>C	exon									0.0612386
NM_000238.4:c.507dup	KCNH2	spCas9	spCas9_55	7:150958452-150958475	+	CCGTCAGCGCCAGCAgcGCG	CGG	GGGCCGTCAGCGCCAGCAgcGCGCGGGCAG	36.54	-2	57.31	-	58.45	C>CG	exon									0.044249
NM_000238.4:c.507dup	KCNH2	spCas9	spCas9_57	7:150958460-150958483	-	TGAAGCTGCCCGCGCgcTGC	TGG	GCCTGAAGCTGCCCGCGCgcTGCTGGCGCT	29.85	-1	54.78	-	64.73	C>CG	exon									-0.0174464
NM_000238.4:c.507dup	KCNH2	CasX	CasX_58	7:150958466-150958490	-	GCCTGAAGCTGCCCGCGCgc	TTCC	AGACCTTCCGCCTGAAGCTGCCCGCGCgcTGCT	-	1	-	-	-	C>CG	exon
NM_000238.4:c.198C>A	KCNH2	spCas9	spCas9_59	7:150974802-150974825	+	CGGCCCGTGCAGGAAGTCtC	AGG	GCGCGGCCCGTGCAGGAAGTCtCAGGTGCA	50.22	2	45.1	-	64.87	C>A	exon									0.0214489
NM_000238.4:c.198C>A	KCNH2	saCas9	saCas9_62	7:150974806-150974833	+	CCGTGCAGGAAGTCtCAGGTG	CAGGGT	GGCCCGTGCAGGAAGTCtCAGGTGCAGGGTCGCT	-	-4	-	-	69.15	C>A	exon
NM_000238.4:c.268G>T	KCNH2	spCas9	spCas9_63	7:150974730-150974753	+	GATTTCCACTTTGCGCTCCT	aGG	GGCGATTTCCACTTTGCGCTCCTaGGCGCC	40.04	4	16.44	-	65.92	G>T	exon									-0.274057
NM_000238.4:c.268G>T	KCNH2	spCas9	spCas9_64	7:150974746-150974769	-	GCAGGCACTGCTGGGCGCCt	AGG	CGCGCAGGCACTGCTGGGCGCCtAGGAGCG	36.43	3	36.57	-	56.35	G>T	exon									-0.126467
NM_000238.4:c.268G>T	KCNH2	CasX	CasX_65	7:150974733-150974757	+	ACTTTGCGCTCCTaGGCGCC	TTCC	GCGATTTCCACTTTGCGCTCCTaGGCGCCCAGC	-	-6	-	-	-	G>T	exon
NM_000238.4:c.268G>T	KCNH2	Cas12a	Cas12a_66	7:150974732-150974757	+	CACTTTGCGCTCCTaGGCGCC	TTTC	GGCGATTTCCACTTTGCGCTCCTaGGCGCCCAGC	-	-4	-	50.5	-	G>T	exon
NM_000238.4:c.250C>T	KCNH2	spCas9	spCas9_67	7:150974764-150974787	-	CGCTGCCGCGCAGATCGCGt	AGG	CCGCGCTGCCGCGCAGATCGCGtAGGCACT	50.89	3	62.73	-	62.93	C>T	exon									0.171058
NM_000238.4:c.3370dup	KCNH2	spCas9	spCas9_69	7:150945451-150945474	+	GGCCTTCTTGGGGAAGCTCT	GGG	TGGGGCCTTCTTGGGGAAGCTCTGGGgcGC	47.62	7	43.66	-	67.3	C>CG	exon									-0.00628466
NM_000238.4:c.3370dup	KCNH2	CasX	CasX_75	7:150945455-150945479	+	TGGGGAAGCTCTGGGgcGCC	TTCT	GGGCCTTCTTGGGGAAGCTCTGGGgcGCCCCCG	-	-4	-	-	-	C>CG	exon
NM_000238.4:c.205_271del	KCNH2	spCas9	spCas9_76	7:150974735-150974758	+	CCACTTTGCGCtGAAGTCGC	AGG	TTTCCACTTTGCGCtGAAGTCGCAGGTGCA	42.5	-6	6.04	-	75.37	AGGAGCCGCGGGTCGTCACGGACGCGCTAGACGCGCCGTCGCGCCGCGACGCACGCGCCGGGCACGTC>A	exon									-0.348217
NM_000238.4:c.205_271del	KCNH2	spCas9	spCas9_77	7:150974734-150974757	-	CCTGCGACTTCaGCGCAAAG	TGG	GCACCTGCGACTTCaGCGCAAAGTGGAAAT	47.67	-6	35.77	-	64.34	AGGAGCCGCGGGTCGTCACGGACGCGCTAGACGCGCCGTCGCGCCGCGACGCACGCGCCGGGCACGTC>A	exon									-0.0700357
NM_000238.4:c.1298_1304del	KCNH2	spCas9	spCas9_78	7:150952660-150952683	+	GGCGGGCCTTCTTCCGTcGC	AGG	GCAGGCGGGCCTTCTTCCGTcGCAGGAAGG	50.97	1	40.51	-	59.13	GAGGAAGT>G	exon									-0.0102156
NM_000238.4:c.1298_1304del	KCNH2	spCas9	spCas9_80	7:150952672-150952695	-	ACTCGGCTGCCTTCCTGCgA	CGG	CCTACTCGGCTGCCTTCCTGCgACGGAAGA	40.28	2	29.01	-	77.09	GAGGAAGT>G	exon									-0.172597
NM_000238.4:c.1298_1304del	KCNH2	CasX	CasX_82	7:150952681-150952705	-	CACCCTACTCGGCTGCCTTC	TTCA	CTGTCTTCACACCCTACTCGGCTGCCTTCCTGC	-	6	-	-	-	GAGGAAGT>G	exon
NM_000238.4:c.1557+1G>C	KCNH2	spCas9	spCas9_83	7:150952420-150952443	-	CGGCTCTGGCTCTGAGGAGc	TGG	CTTCGGCTCTGGCTCTGAGGAGcTGGGGTC	37.68	3	50.6	-	76.72	G>C	exon									-0.00991248
NM_000238.4:c.1557+1G>C	KCNH2	saCas9	saCas9_86	7:150952417-150952444	-	TCGGCTCTGGCTCTGAGGAGc	TGGGGT	TCTTCGGCTCTGGCTCTGAGGAGcTGGGGTCAGC	-	3	-	-	72.18	G>C	exon
NM_000238.4:c.1557+1G>C	KCNH2	CasX	CasX_87	7:150952421-150952445	-	GCTCTGGCTCTGAGGAGcTG	TTCG	TCATCTTCGGCTCTGGCTCTGAGGAGcTGGGGT	-	-2	-	-	-	G>C	exon
NM_000238.4:c.1689G>A	KCNH2	Cas12a	Cas12a_88	7:150951699-150951724	-	CGCTCATCGCGCACTGaCTAG	TTTG	GCACCTTTGCGCTCATCGCGCACTGaCTAGCCTG	-	-2	-	65.98	-	G>A	exon
NM_000238.4:c.2657dup	KCNH2	CasX	CasX_89	7:150948473-150948497	-	GTCGGCAACGCAAGagCGCA	TTCA	GTGGCTTCAGTCGGCAACGCAAGagCGCAAGTT	-	-4	-	-	-	G>GA	exon
NM_000238.4:c.1955_1960delinsT	KCNH2	spCas9	spCas9_90	7:150951092-150951115	+	GTTGCCGAAGATGCaACATG	AGG	CACGTTGCCGAAGATGCaACATGAGGGCTG	66.22	-3	63.66	-	67.01	ATCGTA>T	exon									0.266738
NM_000238.4:c.1955_1960delinsT	KCNH2	spCas9	spCas9_92	7:150951095-150951118	-	CAGCCCTCATGTtGCATCTT	CGG	CCCCAGCCCTCATGTtGCATCTTCGGCAAC	29.07	-5	19.07	-	69.79	ATCGTA>T	exon									-0.317468
NM_000238.4:c.371T>G	KCNH2	spCas9	spCas9_93	7:150959671-150959694	-	ACGAGGATGGGGCTGTCATC	AgG	AGAACGAGGATGGGGCTGTCATCAgGTTCA	56.15	5	44.76	-	57.33	T>G	exon									0.0554793
NM_000238.4:c.805_808delinsAGT	KCNH2	spCas9	spCas9_94	7:150958149-150958172	+	AGCTTTCTCGGGAGCGCGac	tGG	CGCAGCTTTCTCGGGAGCGCGactGGCCAG	42.39	2	47.57	-	69.08	AGGC>TGA	exon									-0.00509783
NM_000238.4:c.805_808delinsAGT	KCNH2	Cas12a	Cas12a_96	7:150958152-150958177	+	TCGGGAGCGCGactGGCCAGG	TTTC	GCAGCTTTCTCGGGAGCGCGactGGCCAGGCTGC	-	-7	-	36.82	-	AGGC>TGA	exon
NM_000238.4:c.307_307+1delinsTT	KCNH2	spCas9	spCas9_97	7:150974699-150974722	+	GCCCGCTCCTAaaATCTTTC	CGG	CCGGCCCGCTCCTAaaATCTTTCCGGTAGA	35.18	-6	8.38	-	69.13	GG>TT	exon									-0.369679
NM_000238.4:c.307_307+1delinsTT	KCNH2	spCas9	spCas9_98	7:150974705-150974728	-	CCTTCTACCGGAAAGATttT	AGG	TCGCCTTCTACCGGAAAGATttTAGGAGCG	22.77	2	0.19	-	72.85	GG>TT	exon									-0.510491
NM_000238.4:c.307_307+1delinsTT	KCNH2	CasX	CasX_101	7:150974702-150974726	-	ACCGGAAAGATttTAGGAGC	TTCT	TCGCCTTCTACCGGAAAGATttTAGGAGCGGGC	-	-7	-	-	-	GG>TT	exon
NM_000238.4:c.162C>G	KCNH2	spCas9	spCas9_102	7:150974849-150974872	-	GCGAGCTGTGCGGCTAgTCG	CGG	TCTGCGAGCTGTGCGGCTAgTCGCGGGCCG	36.74	-1	61.76	-	53.23	C>G	5utr									0.0836335
NM_000238.4:c.162C>G	KCNH2	CasX	CasX_104	7:150974852-150974876	-	GCGAGCTGTGCGGCTAgTCG	TTCT	ACGGCTTCTGCGAGCTGTGCGGCTAgTCGCGGG	-	-3	-	-	-	C>G	5utr
NM_000238.4:c.811_812insA	KCNH2	spCas9	spCas9_105	7:150958151-150958174	+	CTTTCTCGGGAGctCGCGTC	CGG	CAGCTTTCTCGGGAGctCGCGTCCGGGCCA	55.44	-5	26.14	-	71.89	G>GA	exon									-0.106358
NM_000238.4:c.1888del	KCNH2	saCas9	saCas9_107	7:150951480-150951507	+	TTCTCTGAGTTGGTGTTGGGA	GAGaGT	ATCTTCTCTGAGTTGGTGTTGGGAGAGaGTTGCC	-	7	-	-	67.67	TG>T	exon
NM_000238.4:c.1888del	KCNH2	CasX	CasX_108	7:150951480-150951504	+	CTGAGTTGGTGTTGGGAGAG	TTCT	AGATCTTCTCTGAGTTGGTGTTGGGAGAGaGTT	-	2	-	-	-	TG>T	exon
NM_000238.4:c.1862G>A	KCNH2	spCas9	spCas9_109	7:150951508-150951531	+	TGCCGAAGCCCACACTGGTG	AGG	CGTTGCCGAAGCCCACACTGGTGAGGtTGC	57.17	7	55.19	-	37.17	G>A	exon									0.153415
NM_000238.4:c.2987A>T	KCNH2	spCas9	spCas9_111	7:150947474-150947497	+	CCCCCAGAAGCTGAAAATGa	TGG	GTCCCCCCAGAAGCTGAAAATGaTGGACAC	50.98	3	45.23	-	63.1	A>T	exon									0.027484
NM_000238.4:c.2987A>T	KCNH2	CasX	CasX_112	7:150947485-150947509	-	CAGGAGTGTCCAtCATTTTC	TTCT	GCGCCTTCTCAGGAGTGTCCAtCATTTTCAGCT	-	-7	-	-	-	A>T	exon
NM_000238.4:c.2442_2451del	KCNH2	spCas9	spCas9_113	7:150948986-150949009	+	TCCCCGTTCGaCTTGCATAC	AGG	ACATCCCCGTTCGaCTTGCATACAGGTTCA	46.92	-7	26.15	-	71.13	TGAACGGTCCG>T	exon									-0.155657
NM_000238.4:c.2442_2451del	KCNH2	spCas9	spCas9_114	7:150948988-150949011	-	GAACCTGTATGCAAGtCGAA	CGG	TCTGAACCTGTATGCAAGtCGAACGGGGAT	39.81	-2	20.42	-	75.16	TGAACGGTCCG>T	exon									-0.245452
NM_000238.4:c.2442_2451del	KCNH2	saCas9	saCas9_117	7:150948984-150949011	-	GAACCTGTATGCAAGtCGAAC	GGGGAT	TCTGAACCTGTATGCAAGtCGAACGGGGATGTGC	-	-3	-	-	75.71	TGAACGGTCCG>T	exon
NM_000238.4:c.2236del	KCNH2	spCas9	spCas9_118	7:150950307-150950330	+	GGCCCGAAGGCAGCCCTTGG	TGg	CAGGGCCCGAAGGCAGCCCTTGGTGgCCCT	47.43	6	53.29	-	63.44	CG>C	exon									0.0730521
NM_000238.4:c.2236del	KCNH2	spCas9	spCas9_122	7:150950329-150950352	-	AGCACTGCAAACCCTTCCGA	GGG	TGCAGCACTGCAAACCCTTCCGAGGGcCAC	72.53	7	73.46	-	74.25	CG>C	exon									0.381941
NM_000238.4:c.2236del	KCNH2	saCas9	saCas9_125	7:150950316-150950343	+	GCAGCCCTTGGTGgCCCTCGG	AAGGGT	AAGGCAGCCCTTGGTGgCCCTCGGAAGGGTTTGC	-	-5	-	-	67.71	CG>C	exon
NM_000238.4:c.1260C>G	KCNH2	spCas9	spCas9_126	7:150952717-150952740	-	CCTGCTGCTGGTCATCTAgA	CGG	CATCCTGCTGCTGGTCATCTAgACGGCTGT	47.06	2	31.28	-	69.87	C>G	exon									-0.112231
NM_000238.4:c.1620del	KCNH2	saCas9	saCas9_127	7:150951759-150951786	-	GCGCGGAAGCTGGAcGCTACT	CAGAGT	GTGGCGCGGAAGCTGGAcGCTACTCAGAGTACGG	-	-4	-	-	63.96	CT>C	exon
NM_000238.4:c.978del	KCNH2	spCas9	spCas9_128	7:150957427-150957450	+	CTAATGGTGCGGTaCGCACG	AGG	TTGCTAATGGTGCGGTaCGCACGAGGTCGG	67.54	-4	66.61	-	81.56	TC>T	exon									0.294272
NM_000238.4:c.978del	KCNH2	Cas12a	Cas12a_129	7:150957413-150957438	+	GGGAATCTTGCTAATGGTGCG	TTTG	GGTGATTTGGGGAATCTTGCTAATGGTGCGGTaC	-	6	-	52.14	-	TC>T	exon
NM_000238.4:c.906_910dup	KCNH2	spCas9	spCas9_130	7:150958045-150958068	+	CGCGGCGCCCTCACCGGTGc	tgg	TCCCGCGGCGCCCTCACCGGTGctggcgCT	30.67	3	52.13	-	59.33	G>GACCGC	exon									-0.0328384
NM_000238.4:c.906_910dup	KCNH2	spCas9	spCas9_132	7:150958057-150958080	-	CGCCACGCCAGcgccagCAC	CGG	CCGCGCCACGCCAGcgccagCACCGGTGAG	32.11	-1	53.54	-	70.76	G>GACCGC	exon									-0.0163308
NM_000238.4:c.1291T>C	KCNH2	spCas9	spCas9_135	7:150952670-150952693	+	CTTCCGTCTCCTTCAGCAGG	AgG	CTTCTTCCGTCTCCTTCAGCAGGAgGGCAG	48.71	5	47.25	-	66.51	T>C	exon									0.0298534
NM_000238.4:c.1291T>C	KCNH2	spCas9	spCas9_137	7:150952678-150952701	-	CTCGGCTGCCcTCCTGCTGA	AGG	CTACTCGGCTGCCcTCCTGCTGAAGGAGAC	49.58	-7	61.92	-	81.61	T>C	exon									0.151069
NM_000238.4:c.1291T>C	KCNH2	saCas9	saCas9_138	7:150952676-150952703	+	TCTCCTTCAGCAGGAgGGCAG	CCGAGT	CCGTCTCCTTCAGCAGGAgGGCAGCCGAGTAGGG	-	-3	-	-	56.53	T>C	exon
NM_000238.4:c.1291T>C	KCNH2	CasX	CasX_139	7:150952668-150952692	+	TCCGTCTCCTTCAGCAGGAg	TTCT	GGGCCTTCTTCCGTCTCCTTCAGCAGGAgGGCA	-	1	-	-	-	T>C	exon
NM_000238.4:c.1291T>C	KCNH2	CasX	CasX_141	7:150952688-150952712	-	CACCCTACTCGGCTGCCcTC	TTCA	CTGTCTTCACACCCTACTCGGCTGCCcTCCTGC	-	-2	-	-	-	T>C	exon
NM_000238.4:c.82A>G	KCNH2	spCas9	spCas9_142	7:150974918-150974941	+	CGTTGGCGATGATGAACTcA	CGG	GAGCGTTGGCGATGATGAACTcACGGCCTA	63.56	2	65.91	-	61.76	A>G	5utr									0.271369
NM_000238.4:c.82A>G	KCNH2	saCas9	saCas9_146	7:150974932-150974959	-	TCCTCCCCGCCCCCCTAGGCC	GTgAGT	CTCTCCTCCCCGCCCCCCTAGGCCGTgAGTTCAT	-	6	-	-	58.86	A>G	5utr
NM_000238.4:c.1810G>A	KCNH2	spCas9	spCas9_147	7:150951568-150951591	+	CCTTGATGGAGGGGCtGCCC	AGG	TGTCCTTGATGGAGGGGCtGCCCAGGCCGC	54.54	-2	65.6	-	57.21	G>A	exon									0.217679
NM_000238.4:c.1967del	KCNH2	spCas9	spCas9_148	7:150951095-150951118	-	CCTCATGTATGCTAGCATCT	cGG	AGCCCTCATGTATGCTAGCATCTcGGCAAC	37.17	4	26.2	-	68.8	CT>C	exon									-0.21131
NM_000238.4:c.544_551dup	KCNH2	spCas9	spCas9_149	7:150958423-150958446	-	GTGCGGTCGGGCGGCtcggg	cgg	TCGGTGCGGTCGGGCGGCtcgggcggcGCG	24.33	7	12.87	-	79.61	C>CGGCGGGCT	exon									-0.399096
NM_000238.4:c.3054del	KCNH2	spCas9	spCas9_153	7:150947402-150947425	+	GGGGATGTTGAGGAGGCTGG	GGG	GAGGGGGATGTTGAGGAGGCTGGGGGtGGG	47.12	7	38.98	-	59.59	AC>A	exon									-0.0453685
NM_000238.4:c.1790A>G	KCNH2	spCas9	spCas9_160	7:150951584-150951607	+	GCCCAGGCCGCTGCTGTTGc	AGG	GCCGCCCAGGCCGCTGCTGTTGcAGGGTTT	44.17	3	60.12	-	34.3	A>G	exon									0.119169
NM_000238.4:c.1790A>G	KCNH2	spCas9	spCas9_162	7:150951590-150951613	-	GGCAAACCCTgCAACAGCAG	CGG	ATAGGCAAACCCTgCAACAGCAGCGGCCTG	44.07	-7	49.98	-	43.76	A>G	exon									0.0322392
NM_000238.4:c.1790A>G	KCNH2	saCas9	saCas9_163	7:150951582-150951609	+	CCGCCCAGGCCGCTGCTGTTG	cAGGGT	GGGCCGCCCAGGCCGCTGCTGTTGcAGGGTTTGC	-	4	-	-	30.87	A>G	exon
NM_000238.4:c.2062C>T	KCNH2	spCas9	spCas9_164	7:150950986-150951009	+	GCAGGGGATTGGGGATCTaG	TGG	GGCGCAGGGGATTGGGGATCTaGTGGAAGC	47.99	2	60.55	-	58.14	C>T	exon									0.137687
NM_000238.4:c.2062C>T	KCNH2	saCas9	saCas9_166	7:150950990-150951017	+	GGGATTGGGGATCTaGTGGAA	GCGGAT	CAGGGGATTGGGGATCTaGTGGAAGCGGATGAAC	-	-4	-	-	55.81	C>T	exon
NM_000238.4:c.232G>A	KCNH2	spCas9	spCas9_167	7:150974768-150974791	+	GCGCGATCTGCGCGGCAGtG	CGG	CCTGCGCGATCTGCGCGGCAGtGCGGCGCT	23.56	2	29.84	-	66.42	G>A	exon									-0.259875
NM_000238.4:c.1801G>A	KCNH2	spCas9	spCas9_168	7:150951585-150951608	-	ACCCTACAACAGCAGCaGCC	TGG	CAAACCCTACAACAGCAGCaGCCTGGGCGG	52.75	-1	49	-	45.56	G>A	exon									0.0741684
NM_000238.4:c.688G>T	KCNH2	spCas9	spCas9_171	7:150958273-150958296	+	CAGCGCACGCCGCTaCTCCG	CGG	CACCAGCGCACGCCGCTaCTCCGCGGGCCC	41.7	-3	47.39	-	63.01	G>T	exon									-0.00874737
NM_000238.4:c.688G>T	KCNH2	spCas9	spCas9_173	7:150958281-150958304	-	GGCTCGGGCCCGCGGAGtAG	CGG	CAGGGCTCGGGCCCGCGGAGtAGCGGCGTG	34.6	1	38.54	-	64.56	G>T	exon									-0.12341
NM_000238.4:c.1909G>T	KCNH2	spCas9	spCas9_174	7:150951470-150951493	+	GGAGAAGATCTTCTaTGAGT	TGG	GATGGAGAAGATCTTCTaTGAGTTGGTGTT	36.32	-3	30.88	-	48.83	G>T	exon									-0.171651
NM_000238.4:c.1909G>T	KCNH2	saCas9	saCas9_175	7:150951463-150951490	+	CGCAGATGGAGAAGATCTTCT	aTGAGT	TGACGCAGATGGAGAAGATCTTCTaTGAGTTGGT	-	4	-	-	41.37	G>T	exon
NM_000238.4:c.2677_2680dup	KCNH2	spCas9	spCas9_176	7:150948449-150948472	-	CCTTCCGCAGGCGaggcgCA	CGG	TGTCCTTCCGCAGGCGaggcgCACGGACAA	45.21	1	36.41	-	58.64	G>GCGGA	exon									-0.0773553
NM_000238.4:c.2677_2680dup	KCNH2	saCas9	saCas9_179	7:150948441-150948468	-	CCGCAGGCGaggcgCACGGAC	AAGGGT	CTTCCGCAGGCGaggcgCACGGACAAGGGTGAGG	-	-5	-	-	59.77	G>GCGGA	exon
NM_000238.4:c.1838C>T	KCNH2	spCas9	spCas9_180	7:150951552-150951575	-	CATCAAGGACAAGTATGTGA	tGG	CTCCATCAAGGACAAGTATGTGAtGGCGCT	52.56	4	52.51	-	51.74	C>T	exon									0.10007
NM_000238.4:c.87C>A	KCNH2	spCas9	spCas9_181	7:150974918-150974941	+	CGTTGGCGATGATtAACTTA	CGG	GAGCGTTGGCGATGATtAACTTACGGCCTA	38.78	-4	20.68	-	65.18	C>A	5utr									-0.246268
NM_000238.4:c.87C>A	KCNH2	CasX	CasX_182	7:150974905-150974929	+	CCACCCGAGCGTTGGCGATG	TTCT	CGCAGTTCTCCACCCGAGCGTTGGCGATGATtA	-	4	-	-	-	C>A	5utr
NM_000238.4:c.2108del	KCNH2	spCas9	spCas9_183	7:150950936-150950959	+	GCCGTTGGTGTAGGACCAGG	CgG	GATGCCGTTGGTGTAGGACCAGGCgGCTGG	58.57	5	58.85	-	65.01	CA>C	exon									0.183208
NM_000238.4:c.2108del	KCNH2	spCas9	spCas9_185	7:150950950-150950973	-	GAGGAGTACTTCCAGCcGCC	TGG	CTCGAGGAGTACTTCCAGCcGCCTGGTCCT	45.4	-1	49.81	-	68.43	CA>C	exon									0.0310657
NM_000238.4:c.757dup	KCNH2	spCas9	spCas9_186	7:150958202-150958225	+	GGGTTGAGGCTGTGCgcGCC	CGG	TCGGGGTTGAGGCTGTGCgcGCCCGGGGCG	36.4	-2	49.66	-	63.78	C>CG	exon									-0.0211595
NM_000238.4:c.1825G>A	KCNH2	spCas9	spCas9_189	7:150951554-150951577	+	CGTCACATACTTGTtCTTGA	TGG	CGCCGTCACATACTTGTtCTTGATGGAGGG	38.14	-3	13.03	-	57.73	G>A	exon									-0.310693
NM_000238.4:c.2680_2686del	KCNH2	spCas9	spCas9_192	7:150948434-150948457	+	CCCGCCTCACCCTTGtCCTG	CGG	TCCCCCGCCTCACCCTTGtCCTGCGGAAGG	41.38	-2	27.19	-	49.46	AGGCACGC>A	exon									-0.172752
NM_000238.4:c.2680_2686del	KCNH2	spCas9	spCas9_194	7:150948449-150948472	-	AGCGCAAGTTGTCCTTCCGC	AGG	GCAAGCGCAAGTTGTCCTTCCGCAGGaCAA	60.15	7	53.39	-	54.76	AGGCACGC>A	exon									0.15059
NM_000238.4:c.2680_2686del	KCNH2	saCas9	saCas9_198	7:150948441-150948468	-	CAAGTTGTCCTTCCGCAGGaC	AAGGGT	GCGCAAGTTGTCCTTCCGCAGGaCAAGGGTGAGG	-	2	-	-	60.27	AGGCACGC>A	exon
NM_000238.4:c.2680_2686del	KCNH2	CasX	CasX_199	7:150948422-150948446	+	TCCCCTCCCCCGCCTCACCC	TTCC	CCCCCTTCCTCCCCTCCCCCGCCTCACCCTTGt	-	5	-	-	-	AGGCACGC>A	exon
NM_000238.4:c.2774_2775delinsT	KCNH2	spCas9	spCas9_200	7:150947773-150947796	+	CTGGACGGGCTCTCCCCCCA	CGG	CCACTGGACGGGCTCTCCCCCCACGGaCCC	47.11	7	55.33	-	68.72	GG>T	exon									0.0863711
NM_000238.4:c.2774_2775delinsT	KCNH2	spCas9	spCas9_203	7:150947796-150947819	-	GAGTAGCCGGGGCCGGCCGG	GGG	GCCGAGTAGCCGGGGCCGGCCGGGGGtCCG	36.68	7	37.92	-	62.34	GG>T	exon									-0.115725
NM_000238.4:c.1886A>G	KCNH2	CasX	CasX_209	7:150951480-150951504	+	CTGAGTTGGTGTTGGGAGAG	TTCT	AGATCTTCTCTGAGTTGGTGTTGGGAGAGACGc	-	5	-	-	-	A>G	exon
NM_000238.4:c.1886A>C	KCNH2	spCas9	spCas9_210	7:150951485-150951508	+	TGAGTTGGTGTTGGGAGAGA	CGg	CTCTGAGTTGGTGTTGGGAGAGACGgTGCC	45.38	6	39.98	-	44.58	A>C	exon									-0.0426947
NM_000238.4:c.1886A>C	KCNH2	CasX	CasX_211	7:150951480-150951504	+	CTGAGTTGGTGTTGGGAGAG	TTCT	AGATCTTCTCTGAGTTGGTGTTGGGAGAGACGg	-	5	-	-	-	A>C	exon
NM_000238.4:c.2320G>T	KCNH2	spCas9	spCas9_212	7:150950246-150950269	-	GGGACACACTGGTGCATGCT	GGG	CAGGGGACACACTGGTGCATGCTGGGtACC	57.36	7	57.73	-	68.28	G>T	exon									0.165947
NM_000238.4:c.2254C>T	KCNH2	spCas9	spCas9_213	7:150950294-150950317	+	ACTTCATGGCCAGGGCCCaA	AGG	TGAACTTCATGGCCAGGGCCCaAAGGCAGC	46.43	2	27.72	-	58.42	C>T	exon									-0.141713
NM_000238.4:c.2254C>T	KCNH2	spCas9	spCas9_214	7:150950309-150950332	-	GGGCCACCAAGGGCTGCCTT	tGG	GAGGGGCCACCAAGGGCTGCCTTtGGGCCC	29.62	4	14.8	-	60.43	C>T	exon									-0.346559
NM_000238.4:c.2254C>T	KCNH2	CasX	CasX_217	7:150950296-150950320	+	TGGCCAGGGCCCaAAGGCAG	TTCA	TGAACTTCATGGCCAGGGCCCaAAGGCAGCCCT	-	-7	-	-	-	C>T	exon
NM_000238.4:c.2254C>T	KCNH2	CasX	CasX_218	7:150950315-150950339	-	GAGGGGCCACCAAGGGCTGC	TTCC	AACCCTTCCGAGGGGCCACCAAGGGCTGCCTTt	-	5	-	-	-	C>T	exon
NM_000238.4:c.2857dup	KCNH2	spCas9	spCas9_219	7:150947690-150947713	+	GGCTGGAGAAGGGCACCAGG	CGG	TGGGGCTGGAGAAGGGCACCAGGCGGagAG	44.18	7	44.97	-	69.31	T>TC	exon									-0.0161458
NM_000238.4:c.2857dup	KCNH2	spCas9	spCas9_225	7:150947704-150947727	-	GCTCCAGCCCCCTctCCGCC	TGG	GCAGCTCCAGCCCCCTctCCGCCTGGTGCC	34.34	-3	31.44	-	68.46	T>TC	exon									-0.184554
NM_000238.4:c.1885A>G	KCNH2	CasX	CasX_226	7:150951480-150951504	+	CTGAGTTGGTGTTGGGAGAG	TTCT	AGATCTTCTCTGAGTTGGTGTTGGGAGAGACGT	-	6	-	-	-	A>G	exon
NM_000238.4:c.1898A>G	KCNH2	spCas9	spCas9_227	7:150951476-150951499	+	GATCTTCTCTGAGTTGGTGc	TGG	GAAGATCTTCTCTGAGTTGGTGcTGGGAGA	51.32	3	54.75	-	48.76	A>G	exon									0.112196
NM_000238.4:c.1898A>G	KCNH2	CasX	CasX_229	7:150951490-150951514	-	GCAACGTCTCTCCCAgCACC	TTCG	TGGGCTTCGGCAACGTCTCTCCCAgCACCAACT	-	-4	-	-	-	A>G	exon
NM_000238.4:c.1909G>A	KCNH2	spCas9	spCas9_230	7:150951470-150951493	+	GGAGAAGATCTTCTtTGAGT	TGG	GATGGAGAAGATCTTCTtTGAGTTGGTGTT	36.88	-3	16.28	-	45.66	G>A	exon									-0.2876
NM_000238.4:c.1909G>A	KCNH2	saCas9	saCas9_231	7:150951463-150951490	+	CGCAGATGGAGAAGATCTTCT	tTGAGT	TGACGCAGATGGAGAAGATCTTCTtTGAGTTGGT	-	4	-	-	40.15	G>A	exon
NM_000238.4:c.1933A>G	KCNH2	spCas9	spCas9_232	7:150951449-150951472	+	GCCAATGAGCAcGACGCAGA	TGG	ACAGCCAATGAGCAcGACGCAGATGGAGAA	42	-6	29.02	-	58.52	A>G	exon									-0.15684
NM_000238.4:c.1933A>G	KCNH2	spCas9	spCas9_233	7:150951449-150951472	-	TCCATCTGCGTCgTGCTCAT	TGG	TTCTCCATCTGCGTCgTGCTCATTGGCTGT	31.43	-5	10.07	-	45.4	A>G	exon									-0.370372
NM_000238.4:c.1979C>T	KCNH2	spCas9	spCas9_234	7:150951084-150951107	-	TAGCATCTTCGGCAACGTGT	tGG	TGCTAGCATCTTCGGCAACGTGTtGGCCAT	41.44	4	47.13	-	50.28	C>T	exon									-0.00852164
NM_000238.4:c.209A>G	KCNH2	spCas9	spCas9_235	7:150974792-150974815	+	GCTGCGTGCGCGGCCCGcGC	AGG	GGCGCTGCGTGCGCGGCCCGcGCAGGAAGT	34.34	1	34.11	-	66.44	A>G	exon									-0.161961
NM_000238.4:c.209A>G	KCNH2	spCas9	spCas9_236	7:150974805-150974828	-	TGCACCTGCGACTTCCTGCg	CGG	CCCTGCACCTGCGACTTCCTGCgCGGGCCG	42.79	3	51.01	-	63.53	A>G	exon									0.0272383
NM_000238.4:c.211G>C	KCNH2	spCas9	spCas9_238	7:150974786-150974809	+	CGCGGCGCTGCGTGCGCGGC	CgG	CAGCGCGGCGCTGCGTGCGCGGCCgGTGCA	28.19	5	15.67	-	68.99	G>C	exon									-0.350334
NM_000238.4:c.211G>C	KCNH2	spCas9	spCas9_240	7:150974804-150974827	-	GCACCTGCGACTTCCTGCAC	cGG	CCTGCACCTGCGACTTCCTGCACcGGCCGC	46.72	4	56.48	-	67.84	G>C	exon									0.0938342
NM_000238.4:c.215C>A	KCNH2	spCas9	spCas9_241	7:150974792-150974815	+	GCTGCGTGCGCtGCCCGTGC	AGG	GGCGCTGCGTGCGCtGCCCGTGCAGGAAGT	39.67	-6	55.48	-	65.29	C>A	exon									0.0453275
NM_000238.4:c.1894C>T	KCNH2	spCas9	spCas9_242	7:150951476-150951499	+	GATCTTCTCTGAGTTGGTGT	TGG	GAAGATCTTCTCTGAGTTGGTGTTGGaAGA	41.48	7	50.31	-	39.74	C>T	exon									0.0210989
NM_000238.4:c.1894C>T	KCNH2	CasX	CasX_243	7:150951480-150951504	+	CTGAGTTGGTGTTGGaAGAG	TTCT	AGATCTTCTCTGAGTTGGTGTTGGaAGAGACGT	-	-4	-	-	-	C>T	exon
NM_000238.4:c.3281dup	KCNH2	spCas9	spCas9_244	7:150946910-150946933	+	GGGGCTGACGGGCAAcaCAG	CGG	GAGGGGGCTGACGGGCAAcaCAGCGGGGAT	41.9	-2	47.61	-	64.93	G>GT	exon									-0.00635706
NM_000238.4:c.3281dup	KCNH2	saCas9	saCas9_247	7:150946910-150946937	+	GGGGCTGACGGGCAAcaCAGC	GGGGAT	GAGGGGGCTGACGGGCAAcaCAGCGGGGATGTGG	-	-3	-	-	64.91	G>GT	exon
NM_000238.4:c.3281dup	KCNH2	CasX	CasX_248	7:150946918-150946942	-	ACATCCCCGCTGtgTTGCCC	TTCC	CCCACTTCCACATCCCCGCTGtgTTGCCCGTCA	-	-6	-	-	-	G>GT	exon
NM_000238.4:c.206T>C	KCNH2	spCas9	spCas9_249	7:150974791-150974814	+	CGCTGCGTGCGCGGCCCGTG	CgG	CGGCGCTGCGTGCGCGGCCCGTGCgGGAAG	38.49	5	45.77	-	65.61	T>C	exon									-0.0415665
NM_000238.4:c.206T>C	KCNH2	spCas9	spCas9_252	7:150974805-150974828	-	TGCACCTGCGACTTCCcGCA	CGG	CCCTGCACCTGCGACTTCCcGCACGGGCCG	46.3	-1	54.22	-	68.29	T>C	exon									0.0726488
NM_000238.4:c.1800del	KCNH2	spCas9	spCas9_254	7:150951591-150951614	-	TAGGCAAACCCTACAACAGC	AGg	AGATAGGCAAACCCTACAACAGCAGgGCCT	70.31	6	64.02	-	68.54	GC>G	exon									0.293051
NM_000238.4:c.1800del	KCNH2	saCas9	saCas9_259	7:150951581-150951608	+	GCCGCCCAGGCcCTGCTGTTG	TAGGGT	GGGGCCGCCCAGGCcCTGCTGTTGTAGGGTTTGC	-	-7	-	-	71.36	GC>G	exon
NM_000238.4:c.3330+1G>A	KCNH2	saCas9	saCas9_260	7:150946864-150946891	+	GGCTGGAGCTTAtCTGAGAAA	GCGAGT	CAGGGCTGGAGCTTAtCTGAGAAAGCGAGTCCAA	-	-6	-	-	64.7	G>A	exon
NM_000238.4:c.1879T>C	KCNH2	spCas9	spCas9_261	7:150951493-150951516	+	TGTTGGGAGAGACGTTGCCG	AgG	TGGTGTTGGGAGAGACGTTGCCGAgGCCCA	59.54	5	70.47	-	64.95	T>C	exon									0.284522
NM_000238.4:c.1879T>C	KCNH2	spCas9	spCas9_263	7:150951509-150951532	-	AGCCTCACCAGTGTGGGCcT	CGG	AGCAGCCTCACCAGTGTGGGCcTCGGCAAC	39.27	2	40.72	-	41.93	T>C	exon									-0.071375
NM_000238.4:c.1879T>C	KCNH2	CasX	CasX_264	7:150951514-150951538	-	GCAGCCTCACCAGTGTGGGC	TTCA	TCACCTTCAGCAGCCTCACCAGTGTGGGCcTCG	-	2	-	-	-	T>C	exon
NM_000238.4:c.3193C>T	KCNH2	spCas9	spCas9_265	7:150946996-150947019	+	TCTGCCTCTGTAGCAGCTaC	AGG	TCATCTGCCTCTGTAGCAGCTaCAGGACAG	57.1	2	72.79	-	49.22	C>T	exon									0.294204
NM_000238.4:c.3090_3102del	KCNH2	spCas9	spCas9_267	7:150947356-150947379	+	GCCTGCTCTCCACGTCGCCC	CgG	CCAGCCTGCTCTCCACGTCGCCCCgGGGCT	38.33	5	57.35	-	57.36	CCCCGGCGGCTGGG>C	exon									0.0553338
NM_000238.4:c.3090_3102del	KCNH2	spCas9	spCas9_272	7:150947374-150947397	-	AACATCCCCCTCTCCAGCCC	cGG	CTCAACATCCCCCTCTCCAGCCCcGGGGCG	39	4	61.22	-	62.35	CCCCGGCGGCTGGG>C	exon									0.0895693
NM_000238.4:c.3090_3093dup	KCNH2	spCas9	spCas9_276	7:150947375-150947398	+	CCGGGGCCGCCgacccGACC	CGG	GCCCCGGGGCCGCCgacccGACCCGGGCTG	40.42	-6	62.08	-	65.13	C>CTGGG	exon									0.10407
NM_000238.4:c.3090_3093dup	KCNH2	spCas9	spCas9_278	7:150947383-150947406	-	CTCTCCAGCCCGGGTCgggt	cGG	CCCCTCTCCAGCCCGGGTCgggtcGGCGGC	30.82	4	40.26	-	62.2	C>CTGGG	exon									-0.130544
NM_000238.4:c.2763_2772del	KCNH2	spCas9	spCas9_282	7:150947782-150947805	+	CTCTCCCCCCACGGCCcCCC	CGG	GGGCTCTCCCCCCACGGCCcCCCCGGCTAC	45.4	-1	37.31	-	63.85	GGGGGCCGGCC>G	exon									-0.0704287
NM_000238.4:c.2763_2772del	KCNH2	spCas9	spCas9_283	7:150947798-150947821	-	GGGGCAGGGCCGAGTAGCCG	GGG	GCGGGGGCAGGGCCGAGTAGCCGGGGgGGC	33.2	7	72.21	-	67.78	GGGGGCCGGCC>G	exon									0.144602
NM_000238.4:c.1876G>A	KCNH2	spCas9	spCas9_292	7:150951503-150951526	+	GACGTTGCCGAAGCtCACAC	TGG	AGAGACGTTGCCGAAGCtCACACTGGTGAG	55.95	-3	60.25	-	42.57	G>A	exon									0.186315
NM_000238.4:c.1876G>A	KCNH2	spCas9	spCas9_293	7:150951509-150951532	-	AGCCTCACCAGTGTGaGCTT	CGG	AGCAGCCTCACCAGTGTGaGCTTCGGCAAC	36.01	-2	30.81	-	36.08	G>A	exon									-0.170147
NM_000238.4:c.1876G>A	KCNH2	CasX	CasX_294	7:150951520-150951544	-	CCTTCAGCAGCCTCACCAGT	TTCA	TCTACTTCACCTTCAGCAGCCTCACCAGTGTGa	-	5	-	-	-	G>A	exon
NM_000238.4:c.3092_3096dup	KCNH2	spCas9	spCas9_296	7:150947383-150947406	-	TCTCCAGCCCGGGTCGGCgt	cgg	CCCTCTCCAGCCCGGGTCGGCgtcggcGGC	30.64	7	25.97	-	76.97	C>CGGCTG	exon									-0.253718
NM_000238.4:c.2414T>G	KCNH2	spCas9	spCas9_301	7:150949030-150949053	-	CCAGGGAAGAATGACATCTg	TGG	CCTCCAGGGAAGAATGACATCTgTGGGGAG	55.47	3	52.27	-	71.58	T>G	exon									0.108993
NM_000238.4:c.2467C>T	KCNH2	spCas9	spCas9_304	7:150948978-150949001	-	GCAAGTCGAACGGGGATGTG	tGG	CTGGCAAGTCGAACGGGGATGTGtGGGCCC	57.37	4	60.42	-	71.58	C>T	exon									0.187141
NM_000238.4:c.2414T>C	KCNH2	spCas9	spCas9_306	7:150949030-150949053	-	CCAGGGAAGAATGACATCTc	TGG	CCTCCAGGGAAGAATGACATCTcTGGGGAG	41.79	3	33.09	-	70.55	T>C	exon									-0.128228
NM_000238.4:c.2477C>T	KCNH2	spCas9	spCas9_309	7:150948954-150948977	+	TGTGTAGGTCACAGTAGaTG	AGG	TCTTGTGTAGGTCACAGTAGaTGAGGGCCC	62.08	1	75.05	-	52.72	C>T	exon									0.340739
NM_000238.4:c.257T>G	KCNH2	spCas9	spCas9_311	7:150974759-150974782	-	CCGCGCAGATCGCGCAGGCA	CgG	CTGCCGCGCAGATCGCGCAGGCACgGCTGG	35.48	5	49.94	-	63.14	T>G	exon									-0.024017
NM_000238.4:c.257T>G	KCNH2	CasX	CasX_314	7:150974733-150974757	+	ACTTTGCGCTCCTCGGCGCC	TTCC	GCGATTTCCACTTTGCGCTCCTCGGCGCCCAGC	-	6	-	-	-	T>G	exon
NM_000238.4:c.257T>G	KCNH2	Cas12a	Cas12a_315	7:150974739-150974764	+	CGCTCCTCGGCGCCCAGCcGT	TTTG	TCCACTTTGCGCTCCTCGGCGCCCAGCcGTGCCT	-	1	-	52.67	-	T>G	exon
NM_000238.4:c.2510A>G	KCNH2	spCas9	spCas9_316	7:150948915-150948938	+	ACATGTCCAGCACCTCCAGC	AGG	GGTACATGTCCAGCACCTCCAGCAGGcCGT	66.05	7	75.16	-	36.7	A>G	exon									0.369645
NM_000238.4:c.2510A>G	KCNH2	spCas9	spCas9_318	7:150948937-150948960	-	CTACACAAGATCCATCGGGA	CGg	GACCTACACAAGATCCATCGGGACGgCCTG	52.9	6	51.04	-	55.38	A>G	exon									0.0888406
NM_000238.4:c.2510A>G	KCNH2	saCas9	saCas9_321	7:150948925-150948952	+	CACCTCCAGCAGGcCGTCCCG	ATGGAT	CAGCACCTCCAGCAGGcCGTCCCGATGGATCTTG	-	-5	-	-	58.74	A>G	exon
NM_000238.4:c.2509G>A	KCNH2	spCas9	spCas9_322	7:150948927-150948950	+	CCTCCAGCAGGTtGTCCCGA	TGG	GCACCTCCAGCAGGTtGTCCCGATGGATCT	48.12	-5	29.21	-	46.84	G>A	exon									-0.116078
NM_000238.4:c.2509G>A	KCNH2	spCas9	spCas9_323	7:150948929-150948952	-	GATCCATCGGGACaACCTGC	TGG	CAAGATCCATCGGGACaACCTGCTGGAGGT	51.88	-4	38.21	-	60.19	G>A	exon									-0.0241715
NM_000238.4:c.2509G>A	KCNH2	saCas9	saCas9_325	7:150948925-150948952	+	CACCTCCAGCAGGTtGTCCCG	ATGGAT	CAGCACCTCCAGCAGGTtGTCCCGATGGATCTTG	-	-4	-	-	43.71	G>A	exon
NM_000238.4:c.3100_3107delinsGGC	KCNH2	spCas9	spCas9_326	7:150947351-150947374	+	ATCCAGCCTGCTCTCCACGT	CGg	GGCATCCAGCCTGCTCTCCACGTCGgccCC	42.11	6	48.04	-	66.24	GGGGCCCC>CGG	exon									-0.00199405
NM_000238.4:c.3100_3107delinsGGC	KCNH2	spCas9	spCas9_327	7:150947373-150947396	-	CTCTCCAGCCCGGGTCGGCG	Ggg	CCCCTCTCCAGCCCGGGTCGGCGGggcCGA	43.85	7	65.64	-	76.17	GGGGCCCC>CGG	exon									0.149981
NM_000238.4:c.2145+1G>A	KCNH2	spCas9	spCas9_329	7:150950914-150950937	-	GCATCGACATGAACGCGaTG	AGG	ACGGCATCGACATGAACGCGaTGAGGCCAC	57.98	1	66.99	-	69.35	G>A	exon									0.245452
NM_000238.4:c.1502A>G	KCNH2	spCas9	spCas9_330	7:150952466-150952489	+	TGGCGGCCACCATGcCGATG	AGG	GGATGGCGGCCACCATGcCGATGAGGAACC	47.13	-3	67.7	-	45.71	A>G	exon									0.195321
NM_000238.4:c.1502A>G	KCNH2	spCas9	spCas9_331	7:150952479-150952502	-	TTCAAGGGCTGGTTCCTCAT	CGg	TACTTCAAGGGCTGGTTCCTCATCGgCATG	39.89	6	36.98	-	49.9	A>G	exon									-0.100979
NM_000238.4:c.1502A>G	KCNH2	CasX	CasX_334	7:150952478-150952502	-	AGGGCTGGTTCCTCATCGgC	TTCA	ACTACTTCAAGGGCTGGTTCCTCATCGgCATGG	-	-1	-	-	-	A>G	exon
NM_000238.4:c.1501G>A	KCNH2	spCas9	spCas9_335	7:150952466-150952489	+	TGGCGGCCACCATGTtGATG	AGG	GGATGGCGGCCACCATGTtGATGAGGAACC	54.86	-2	61.92	-	36.23	G>A	exon									0.195646
NM_000238.4:c.1501G>A	KCNH2	spCas9	spCas9_336	7:150952474-150952497	-	GGGCTGGTTCCTCATCaACA	TGG	CAAGGGCTGGTTCCTCATCaACATGGTGGC	50.72	-1	55.79	-	41.42	G>A	exon									0.119499
NM_000238.4:c.1501G>A	KCNH2	CasX	CasX_338	7:150952478-150952502	-	AGGGCTGGTTCCTCATCaAC	TTCA	ACTACTTCAAGGGCTGGTTCCTCATCaACATGG	-	-2	-	-	-	G>A	exon
NM_000238.4:c.3099dup	KCNH2	spCas9	spCas9_339	7:150947357-150947380	+	CCTGCTCTCCACGTCGCCCC	GGG	CAGCCTGCTCTCCACGTCGCCCCGGGgcGC	61.22	7	60.71	-	61.54	C>CG	exon									0.215007
NM_000238.4:c.3099dup	KCNH2	spCas9	spCas9_341	7:150947374-150947397	-	AGCCCGGGTCGGCGGCgcCC	CGG	TCCAGCCCGGGTCGGCGGCgcCCCGGGGCG	26.5	1	32.77	-	74.28	C>CG	exon									-0.221034
NM_000238.4:c.1421C>T	KCNH2	spCas9	spCas9_344	7:150952542-150952565	+	CTCGTTGGCATTGACGTAGa	TGG	CTCCTCGTTGGCATTGACGTAGaTGGTGCG	42.22	3	19.79	-	33.95	C>T	exon									-0.224044
NM_000238.4:c.3097_3098dup	KCNH2	spCas9	spCas9_346	7:150947358-150947381	+	CTGCTCTCCACGTCGCCCCG	GGG	AGCCTGCTCTCCACGTCGCCCCGGGGccgC	54.73	7	59.47	-	62.64	G>GGC	exon									0.166673
NM_000238.4:c.3097_3098dup	KCNH2	spCas9	spCas9_347	7:150947380-150947403	-	TCTCCAGCCCGGGTCGGCGG	cgg	CCCTCTCCAGCCCGGGTCGGCGGcggCCCC	32.07	6	35.69	-	72.48	G>GGC	exon									-0.164015
NM_000238.4:c.640G>T	KCNH2	spCas9	spCas9_351	7:150958320-150958343	+	CCATGGCTGTCACTTaGTCC	AGG	TGTCCATGGCTGTCACTTaGTCCAGGGCCA	60.01	-2	70.32	-	46.09	G>T	exon									0.291772
NM_000238.4:c.3032del	KCNH2	spCas9	spCas9_353	7:150947430-150947453	+	GCGGGGCATCGAGGGAGcCC	TGG	GGGGCGGGGCATCGAGGGAGcCCTGGTACT	40.25	1	39.83	-	75.65	GA>G	exon									-0.0832713
NM_000238.4:c.3032del	KCNH2	spCas9	spCas9_355	7:150947447-150947470	-	CAGTCGGGGCCGCCAGTACC	AGG	GGACAGTCGGGGCCGCCAGTACCAGGgCTC	53.17	7	70.66	-	60.26	GA>G	exon									0.250422
NM_000238.4:c.234_241del	KCNH2	spCas9	spCas9_357	7:150974760-150974783	+	CAGTGCCTGCGCGATCtGCG	CGG	CAGCAGTGCCTGCGCGATCtGCGCGGCGCT	31.71	-1	50.91	-	65.17	ACGCGCCGT>A	exon									-0.0386044
NM_000238.4:c.234_241del	KCNH2	spCas9	spCas9_358	7:150974764-150974787	-	CAGCGCCGCGCaGATCGCGC	AGG	ACGCAGCGCCGCGCaGATCGCGCAGGCACT	54	-6	62.71	-	69.25	ACGCGCCGT>A	exon									0.187077
NM_000238.4:c.1600C>T	KCNH2	spCas9	spCas9_359	7:150951786-150951809	-	GCTGCTGCGGCTGGTGtGCG	TGG	GCGGCTGCTGCGGCTGGTGtGCGTGGCGCG	35.07	-1	56.73	-	56.33	C>T	exon									0.0315611
NM_000238.4:c.2767_2770dup	KCNH2	spCas9	spCas9_361	7:150947782-150947805	+	CTCTCCCCCCACGGCCCCcc	cgg	GGGCTCTCCCCCCACGGCCCCcccggCCCG	37.72	2	34.52	-	65.22	G>GGGCC	exon									-0.138533
NM_000238.4:c.2767_2770dup	KCNH2	spCas9	spCas9_363	7:150947800-150947823	-	GTAGCCGGGGCCGGCCGGGc	cgg	CGAGTAGCCGGGGCCGGCCGGGccgggGGG	22.94	7	3.44	-	63.38	G>GGGCC	exon									-0.479863
NM_000238.4:c.3108_3112dup	KCNH2	spCas9	spCas9_372	7:150947364-150947387	-	GCCCCGGGGCGACGTcgacg	tGG	GCGGCCCCGGGGCGACGTcgacgtGGAGAG	48.92	4	56.18	-	77.72	T>TGCAGC	exon									0.101164
NM_000238.4:c.158G>A	KCNH2	spCas9	spCas9_374	7:150974849-150974872	-	GCGAGCTGTGCGaCTACTCG	CGG	TCTGCGAGCTGTGCGaCTACTCGCGGGCCG	49.87	-5	56.39	-	53.33	G>A	5utr									0.115859
NM_000238.4:c.158G>A	KCNH2	CasX	CasX_376	7:150974852-150974876	-	GCGAGCTGTGCGaCTACTCG	TTCT	ACGGCTTCTGCGAGCTGTGCGaCTACTCGCGGG	-	-7	-	-	-	G>A	5utr
NM_000238.4:c.767dup	KCNH2	spCas9	spCas9_377	7:150958190-150958213	+	CCCGAGGCGTCGGGGTTgaG	AGG	GAGCCCGAGGCGTCGGGGTTgaGAGGCTGT	50.05	1	61.98	-	66.81	C>CT	exon									0.158811
NM_000238.4:c.157G>C	KCNH2	spCas9	spCas9_378	7:150974840-150974863	+	TCACCTCGGCCCGCGAGTAG	CgG	GCATCACCTCGGCCCGCGAGTAGCgGCACA	42.74	5	30.8	-	69.1	G>C	5utr									-0.141103
NM_000238.4:c.157G>C	KCNH2	spCas9	spCas9_379	7:150974849-150974872	-	GCGAGCTGTGCcGCTACTCG	CGG	TCTGCGAGCTGTGCcGCTACTCGCGGGCCG	39.54	-6	56.58	-	62.47	G>C	5utr									0.0544843
NM_000238.4:c.1181del	KCNH2	spCas9	spCas9_381	7:150952779-150952802	+	CAGGATGGTCCAGCGGTGGA	TgG	ATGCAGGATGGTCCAGCGGTGGATgGCGGT	33.04	5	50.97	-	61.94	CG>C	exon									-0.0293814
NM_000238.4:c.1181del	KCNH2	spCas9	spCas9_383	7:150952787-150952810	-	CAGGCACCGCcATCCACCGC	TGG	CTGCAGGCACCGCcATCCACCGCTGGACCA	50.7	-7	56.56	-	78.48	CG>C	exon									0.114426
NM_000238.4:c.1825_1830del	KCNH2	spCas9	spCas9_384	7:150951548-150951571	+	GAGCGCCGTCACATaCTTGA	TGG	GTAGAGCGCCGTCACATaCTTGATGGAGGG	49.35	-3	23.36	-	55.66	TGAACAG>T	exon									-0.159757
NM_000238.4:c.1825_1830del	KCNH2	spCas9	spCas9_387	7:150951552-150951575	-	CCCCTCCATCAAGtATGTGA	CGG	CGGCCCCTCCATCAAGtATGTGACGGCGCT	42.84	-4	42.3	-	62.58	TGAACAG>T	exon									-0.0438749
NM_000238.4:c.172G>T	KCNH2	spCas9	spCas9_388	7:150974826-150974849	+	GCAGGGTCGCTGCATCACCT	aGG	GGTGCAGGGTCGCTGCATCACCTaGGCCCG	50.91	4	57.42	-	61.3	G>T	5utr									0.127964
NM_000238.4:c.172G>T	KCNH2	spCas9	spCas9_389	7:150974842-150974865	-	GTGCGGCTACTCGCGGGCCt	AGG	GCTGTGCGGCTACTCGCGGGCCtAGGTGAT	37.79	3	23.42	-	78.78	G>T	5utr									-0.233624
NM_000238.4:c.172G>T	KCNH2	saCas9	saCas9_390	7:150974831-150974858	+	GTCGCTGCATCACCTaGGCCC	GCGAGT	AGGGTCGCTGCATCACCTaGGCCCGCGAGTAGCC	-	-3	-	-	53.37	G>T	5utr
NM_000238.4:c.128A>G	KCNH2	spCas9	spCas9_391	7:150974877-150974900	+	GCCGTCGTTGCAGcAGATGA	CGG	GAAGCCGTCGTTGCAGcAGATGACGGCGCA	46.21	-4	44.88	-	35.5	A>G	5utr									0.00523888
NM_000238.4:c.128A>G	KCNH2	spCas9	spCas9_392	7:150974877-150974900	-	GCCGTCATCTgCTGCAACGA	CGG	TGCGCCGTCATCTgCTGCAACGACGGCTTC	50.31	-7	51.13	-	41.5	A>G	5utr									0.07873
NM_000238.4:c.1877del	KCNH2	spCas9	spCas9_393	7:150951502-150951525	+	AGACGTTGCCGAAgCCACAC	TGG	GAGAGACGTTGCCGAAgCCACACTGGTGAG	53.41	-4	48.56	-	69.73	CG>C	exon									0.0670234
NM_000238.4:c.1877del	KCNH2	spCas9	spCas9_394	7:150951515-150951538	-	CTTCAGCAGCCTCACCAGTG	TGG	CACCTTCAGCAGCCTCACCAGTGTGGcTTC	57.18	7	56.42	-	53.79	CG>C	exon									0.158532
NM_000238.4:c.1877del	KCNH2	CasX	CasX_396	7:150951519-150951543	-	CCTTCAGCAGCCTCACCAGT	TTCA	TCTACTTCACCTTCAGCAGCCTCACCAGTGTGG	-	6	-	-	-	CG>C	exon
NM_000238.4:c.1956del	KCNH2	spCas9	spCas9_398	7:150951096-150951119	+	CCGAAGATGCTAGcTACATG	AGG	TTGCCGAAGATGCTAGcTACATGAGGGCTG	64.93	-4	68.03	-	72.85	GT>G	exon									0.293416
NM_000238.4:c.774_789del	KCNH2	spCas9	spCas9_400	7:150958165-150958188	+	CGTCCGGGCCAGGCTGCAGC	tGG	GCGCGTCCGGGCCAGGCTGCAGCtGGGTTG	48.34	4	55.9	-	67.57	ACCTCGGGCTCCGCAGC>A	exon									0.0985758
NM_000238.4:c.774_789del	KCNH2	spCas9	spCas9_403	7:150958172-150958195	-	GCCTCAACCCaGCTGCAGCC	TGG	ACAGCCTCAACCCaGCTGCAGCCTGGCCCG	49.59	-7	54.7	-	79.02	ACCTCGGGCTCCGCAGC>A	exon									0.0924875
NM_000238.4:c.774_789del	KCNH2	saCas9	saCas9_404	7:150958163-150958190	+	CGCGTCCGGGCCAGGCTGCAG	CtGGGT	GAGCGCGTCCGGGCCAGGCTGCAGCtGGGTTGAG	-	5	-	-	67.34	ACCTCGGGCTCCGCAGC>A	exon
NM_000238.4:c.1580del	KCNH2	spCas9	spCas9_405	7:150951811-150951834	-	CTGATCGGGCTGCTGAAGAC	TGg	CAGCTGATCGGGCTGCTGAAGACTGgCGGC	37.47	6	62.44	-	54.5	GC>G	exon									0.0930945
NM_000238.4:c.3098_3101dup	KCNH2	spCas9	spCas9_408	7:150947356-150947379	+	GCCTGCTCTCCACGTCGCCC	CGg	CCAGCCTGCTCTCCACGTCGCCCCGgggcc	38.98	6	56.48	-	61.25	C>CCCGG	exon									0.0507721
NM_000238.4:c.3098_3101dup	KCNH2	spCas9	spCas9_413	7:150947374-150947397	-	CCGGGTCGGCGGCCCggccc	CGG	AGCCCGGGTCGGCGGCCCggcccCGGGGCG	25.73	3	32.75	-	67.2	C>CCCGG	exon									-0.223524
NM_000238.4:c.1858A>G	KCNH2	spCas9	spCas9_416	7:150951518-150951541	+	CACACTGGTGAGGCTGCcGA	AGG	GCCCACACTGGTGAGGCTGCcGAAGGTGAA	64.9	1	59.97	-	41.44	A>G	exon									0.236471
NM_000238.4:c.1858A>G	KCNH2	spCas9	spCas9_417	7:150951533-150951556	-	ACGGCGCTCTACTTCACCTT	CgG	GTGACGGCGCTCTACTTCACCTTCgGCAGC	39.58	5	26.4	-	51.69	A>G	exon									-0.190416
NM_000238.4:c.1715G>T	KCNH2	spCas9	spCas9_418	7:150951662-150951685	+	TGGCTGCTCCATGTTGaCGA	TGG	GTGTGGCTGCTCCATGTTGaCGATGGCGTA	49.38	-1	38.59	-	70.2	G>T	exon									-0.0386522
NM_000238.4:c.1715G>T	KCNH2	spCas9	spCas9_419	7:150951669-150951692	-	CTGGTACGCCATCGtCAACA	TGG	CATCTGGTACGCCATCGtCAACATGGAGCA	58.53	-3	63.43	-	56.41	G>T	exon									0.223296
NM_000238.4:c.2742_2775del	KCNH2	spCas9	spCas9_420	7:150947773-150947796	+	CTGGACGGGCTCTCCCCCCA	CGg	CCACTGGACGGGCTCTCCCCCCACGgCCCG	48.31	6	59.62	-	66.04	CGGGGGGGCCGGCCGGGGCCGATGAGCCGGGACGG>C	exon									0.129488
NM_000238.4:c.2742_2775del	KCNH2	spCas9	spCas9_422	7:150947795-150947818	-	GCCTTGGGGCCGGGCCGGGC	GGG	TCGGCCTTGGGGCCGGGCCGGGCGGGcCGT	31.74	7	24.74	-	68.81	CGGGGGGGCCGGCCGGGGCCGATGAGCCGGGACGG>C	exon									-0.25495
NM_000238.4:c.1714G>A	KCNH2	spCas9	spCas9_428	7:150951662-150951685	+	TGGCTGCTCCATGTTGCtGA	TGG	GTGTGGCTGCTCCATGTTGCtGATGGCGTA	40	1	35.45	-	72.42	G>A	exon									-0.119795
NM_000238.4:c.1714G>A	KCNH2	spCas9	spCas9_429	7:150951669-150951692	-	CTGGTACGCCATCaGCAACA	TGG	CATCTGGTACGCCATCaGCAACATGGAGCA	54.06	-4	57.63	-	64.24	G>A	exon									0.147139
NM_000238.4:c.461G>A	KCNH2	spCas9	spCas9_430	7:150959567-150959590	+	CTTACCTGGGGCCAGCtAGC	TGG	ACACTTACCTGGGGCCAGCtAGCTGGTGGG	24.38	-1	1.19	-	75.35	G>A	exon									-0.493647
NM_000238.4:c.461G>A	KCNH2	spCas9	spCas9_435	7:150959577-150959600	-	GGGCCCCCCCACCAGCTaGC	TGG	CCGGGGCCCCCCCACCAGCTaGCTGGCCCC	29.59	1	13.51	-	65.48	G>A	exon									-0.358892
NM_000238.4:c.1003C>T	KCNH2	spCas9	spCas9_437	7:150957396-150957419	+	CACAAAGTTGAGGGTGATTT	aGG	GTCCACAAAGTTGAGGGTGATTTaGGGAAT	37.08	4	24.95	-	58.21	C>T	exon									-0.218896
NM_000238.4:c.1003C>T	KCNH2	saCas9	saCas9_439	7:150957396-150957423	+	CACAAAGTTGAGGGTGATTTa	GGGAAT	GTCCACAAAGTTGAGGGTGATTTaGGGAATCTTG	-	3	-	-	56.54	C>T	exon
NM_000238.4:c.2785del	KCNH2	spCas9	spCas9_440	7:150947772-150947795	+	ACTGGACGGGCTCtCCCCCA	CGG	GCCACTGGACGGGCTCtCCCCCACGGCCCC	46.72	-4	51.74	-	68.06	AG>A	exon									0.0547512
NM_000238.4:c.2785del	KCNH2	spCas9	spCas9_441	7:150947785-150947808	-	GCCGGCCGGGGGGGCCGTGG	GGG	GGGGCCGGCCGGGGGGGCCGTGGGGGaGAG	29.69	7	14.06	-	65.79	AG>A	exon									-0.353877
NM_000238.4:c.3100_3106dup	KCNH2	spCas9	spCas9_442	7:150947356-150947379	+	GCCTGCTCTCCACGTCGccc	cgg	CCAGCCTGCTCTCCACGTCGccccggggCC	38.98	1	56.48	-	63.11	G>GGGGCCCC	exon									0.0502052
NM_000238.4:c.3100_3106dup	KCNH2	spCas9	spCas9_445	7:150947373-150947396	-	GTCGGCGGCCCCGGGGcccc	ggg	CGGGTCGGCGGCCCCGGGGccccggggCGA	43.27	7	42.86	-	66.99	G>GGGGCCCC	exon									-0.0381056
NM_000238.4:c.1778T>A	KCNH2	spCas9	spCas9_448	7:150951598-150951621	+	TGTTGTAGGGTTTGCCTtTC	TGG	TGCTGTTGTAGGGTTTGCCTtTCTGGTCGC	26.86	1	15.59	-	49.81	T>A	exon									-0.352892
NM_000238.4:c.1778T>A	KCNH2	spCas9	spCas9_449	7:150951611-150951634	-	CACAACCTGGGCGACCAGAa	AGG	CTGCACAACCTGGGCGACCAGAaAGGCAAA	40.62	3	32.28	-	52.75	T>A	exon									-0.136283
NM_000238.4:c.1229G>A	KCNH2	spCas9	spCas9_450	7:150952737-150952760	+	CAGGATGAGCCAGTCCtACA	CGG	CAGCAGGATGAGCCAGTCCtACACGGCCTT	62.9	-1	76.59	-	60.24	G>A	exon									0.355898
NM_000238.4:c.1229G>A	KCNH2	spCas9	spCas9_451	7:150952750-150952773	-	CAGCCCCTTCAAGGCCGTGT	aGG	TTACAGCCCCTTCAAGGCCGTGTaGGACTG	53.82	4	40.01	-	62.14	G>A	exon									0.00134718
NM_000238.4:c.1745_1746dup	KCNH2	spCas9	spCas9_453	7:150951641-150951664	-	CACATGGACTCACGCAgcaT	CGG	CCACACATGGACTCACGCAgcaTCGGCTGG	51.2	2	49.91	-	63.58	A>ACG	exon									0.0671409
NM_000238.4:c.1745_1746dup	KCNH2	saCas9	saCas9_455	7:150951631-150951658	+	TGTGCAGCCAGCCGAtgcTGC	GTGAGT	GGTTGTGCAGCCAGCCGAtgcTGCGTGAGTCCAT	-	-3	-	-	62.93	A>ACG	exon
NM_000238.4:c.1027del	KCNH2	spCas9	spCas9_456	7:150957385-150957408	-	CCCTCAACTTTGTGGACtCA	AGG	TCACCCTCAACTTTGTGGACtCAAGGGCGA	58.83	1	17.17	-	75.35	TC>T	exon									-0.161506
NM_000238.4:c.1027del	KCNH2	saCas9	saCas9_458	7:150957367-150957394	+	GAAGCCAAGAAGGGGTCGCCC	TTGaGT	GGCGAAGCCAAGAAGGGGTCGCCCTTGaGTCCAC	-	7	-	-	69.31	TC>T	exon
NM_000238.4:c.1027del	KCNH2	CasX	CasX_459	7:150957396-150957420	-	CCAAATCACCCTCAACTTTG	TTCC	CAAGATTCCCCAAATCACCCTCAACTTTGTGGA	-	7	-	-	-	TC>T	exon
NM_000238.4:c.707_708del	KCNH2	spCas9	spCas9_460	7:150958243-150958266	+	CGCGCTGCGGGGCGGAGAGC	CGG	GGGCGCGCTGCGGGGCGGAGAGCCGGgCCA	19.03	7	19.54	-	65.45	CTG>C	exon									-0.37074
NM_000238.4:c.707_708del	KCNH2	spCas9	spCas9_462	7:150958266-150958289	-	GGAGGAGCGGCGTGCGCTGG	TGG	CGCGGAGGAGCGGCGTGCGCTGGTGGcCCG	40.46	7	64.63	-	58.35	CTG>C	exon									0.127359
NM_000238.4:c.812_813del	KCNH2	spCas9	spCas9_464	7:150958138-150958161	+	CACGCTGGCGCAGCTTTCTC	GGG	GCGCACGCTGGCGCAGCTTTCTCGGGaGCG	45.54	7	58.97	-	60.17	TCG>T	exon									0.109796
NM_000238.4:c.1750G>A	KCNH2	spCas9	spCas9_467	7:150951637-150951660	-	ACATGGACTCACGCATCaGC	TGG	CACACATGGACTCACGCATCaGCTGGCTGC	62.98	1	61.91	-	58.13	G>A	exon									0.236173
NM_000238.4:c.1750G>A	KCNH2	saCas9	saCas9_468	7:150951628-150951655	+	GGTTGTGCAGCCAGCtGATGC	GTGAGT	CCAGGTTGTGCAGCCAGCtGATGCGTGAGTCCAT	-	-3	-	-	65.99	G>A	exon
NM_000238.4:c.1557+1G>A	KCNH2	spCas9	spCas9_469	7:150952420-150952443	-	CGGCTCTGGCTCTGAGGAGa	TGG	CTTCGGCTCTGGCTCTGAGGAGaTGGGGTC	36.05	3	42.26	-	75.42	G>A	exon									-0.0876563
NM_000238.4:c.1557+1G>A	KCNH2	saCas9	saCas9_472	7:150952417-150952444	-	TCGGCTCTGGCTCTGAGGAGa	TGGGGT	TCTTCGGCTCTGGCTCTGAGGAGaTGGGGTCAGC	-	3	-	-	71.63	G>A	exon
NM_000238.4:c.1557+1G>A	KCNH2	CasX	CasX_473	7:150952421-150952445	-	GCTCTGGCTCTGAGGAGaTG	TTCG	TCATCTTCGGCTCTGGCTCTGAGGAGaTGGGGT	-	-2	-	-	-	G>A	exon
NM_000238.4:c.2285_2286del	KCNH2	spCas9	spCas9_474	7:150950263-150950286	+	GTGTCCCCTGGCGGTGcGTG	TGG	AGTGTGTCCCCTGGCGGTGcGTGTGGTCTT	49.46	-1	47.3	-	63.18	GTA>G	exon									0.0356472
NM_000238.4:c.2285_2286del	KCNH2	spCas9	spCas9_475	7:150950268-150950291	-	TCAAGACCACACgCACCGCC	AGG	AGTTCAAGACCACACgCACCGCCAGGGGAC	61.19	-5	54.38	-	53.98	GTA>G	exon									0.165033
NM_000238.4:c.1624del	KCNH2	spCas9	spCas9_478	7:150951755-150951778	-	GCTGGATCGCaCTCAGAGTA	CGG	GAAGCTGGATCGCaCTCAGAGTACGGCGCG	48.47	-7	41.55	-	66.66	AT>A	exon									-0.0185079
NM_000238.4:c.1624del	KCNH2	saCas9	saCas9_479	7:150951759-150951786	-	GCGCGGAAGCTGGATCGCaCT	CAGAGT	GTGGCGCGGAAGCTGGATCGCaCTCAGAGTACGG	-	1	-	-	60.88	AT>A	exon
NM_000238.4:c.3172dup	KCNH2	spCas9	spCas9_480	7:150947025-150947048	-	CCCGGCTGAGTGCgcAGACA	TGG	AGACCCGGCTGAGTGCgcAGACATGGCCAC	57.73	-3	68.55	-	64.29	C>CG	exon									0.258379
NM_000238.4:c.3172dup	KCNH2	saCas9	saCas9_481	7:150947023-150947050	+	TGGCCATGTCTgcGCACTCAG	CCGGGT	CAGTGGCCATGTCTgcGCACTCAGCCGGGTCTCC	-	-7	-	-	68.08	C>CG	exon
NM_000238.4:c.529G>T	KCNH2	spCas9	spCas9_482	7:150958428-150958451	+	CCGACCGCACCGACGACTaC	CGG	CGCCCGACCGCACCGACGACTaCCGGGCCG	48.92	2	38.92	-	67.97	G>T	exon									-0.0379348
NM_000238.4:c.529G>T	KCNH2	spCas9	spCas9_484	7:150958446-150958469	-	CGCTGCTGGCGCTGACGGCC	CGG	CCGCGCTGCTGGCGCTGACGGCCCGGtAGT	35.72	7	51.72	-	48.58	G>T	exon									-0.00353026
NM_000238.4:c.1688G>A	KCNH2	Cas12a	Cas12a_486	7:150951699-150951724	-	CGCTCATCGCGCACTaGCTAG	TTTG	GCACCTTTGCGCTCATCGCGCACTaGCTAGCCTG	-	-3	-	63.21	-	G>A	exon
NM_000238.4:c.1968_1969delinsTT	KCNH2	spCas9	spCas9_487	7:150951084-150951107	-	TAGCATCTTttGCAACGTGT	CGG	TGCTAGCATCTTttGCAACGTGTCGGCCAT	43.54	-7	21.15	-	59.56	GC>TT	exon									-0.212969
NM_000238.4:c.1966_1989del	KCNH2	spCas9	spCas9_488	7:150951055-150951078	+	CTGTGCCCGAGTACAGCCGC	TgG	GGGCTGTGCCCGAGTACAGCCGCTgGATGC	49.72	5	67.58	-	71.44	CCTACTACCGGCTGTGCAACGGCTT>C	exon									0.201573
NM_000238.4:c.1966_1989del	KCNH2	spCas9	spCas9_489	7:150951070-150951093	-	TCATGTATGCTAGCATCcAG	CGG	CCCTCATGTATGCTAGCATCcAGCGGCTGT	58.07	1	50.64	-	69.23	CCTACTACCGGCTGTGCAACGGCTT>C	exon									0.111432
NM_000238.4:c.1966_1989del	KCNH2	saCas9	saCas9_490	7:150951053-150951080	+	GGCTGTGCCCGAGTACAGCCG	CTgGAT	GCGGGCTGTGCCCGAGTACAGCCGCTgGATGCTA	-	6	-	-	66.39	CCTACTACCGGCTGTGCAACGGCTT>C	exon
NM_000238.4:c.2960del	KCNH2	spCas9	spCas9_491	7:150947590-150947613	+	CCGTCGCCCGGGATACCTGA	cGG	CGCCCGTCGCCCGGGATACCTGAcGGGGGT	42.89	4	31.33	-	68.73	GT>G	exon									-0.135755
NM_000238.4:c.2960del	KCNH2	spCas9	spCas9_495	7:150947604-150947627	-	CGACACTTGCAACCCCCgTC	AGG	CAGCGACACTTGCAACCCCCgTCAGGTATC	62.11	1	63.56	-	62.77	GT>G	exon									0.243274
NM_000238.4:c.2960del	KCNH2	saCas9	saCas9_496	7:150947590-150947617	+	CCGTCGCCCGGGATACCTGAc	GGGGGT	CGCCCGTCGCCCGGGATACCTGAcGGGGGTTGCA	-	3	-	-	67.07	GT>G	exon
NM_000238.4:c.1681G>C	KCNH2	spCas9	spCas9_497	7:150951690-150951713	+	CAGATGCAGGCTAGCCAGTG	CGg	TACCAGATGCAGGCTAGCCAGTGCGgGATG	54.02	6	57.93	-	64.32	G>C	exon									0.149351
NM_000238.4:c.1681G>C	KCNH2	spCas9	spCas9_499	7:150951703-150951726	-	CCTTTGCGCTCATCcCGCAC	TGG	GCACCTTTGCGCTCATCcCGCACTGGCTAG	52.11	-3	48.98	-	58.49	G>C	exon									0.0663362
NM_000238.4:c.1681G>C	KCNH2	saCas9	saCas9_500	7:150951689-150951716	+	CCAGATGCAGGCTAGCCAGTG	CGgGAT	GTACCAGATGCAGGCTAGCCAGTGCGgGATGAGC	-	6	-	-	61.22	G>C	exon
NM_000238.4:c.1681G>A	KCNH2	spCas9	spCas9_501	7:150951703-150951726	-	CCTTTGCGCTCATCaCGCAC	TGG	GCACCTTTGCGCTCATCaCGCACTGGCTAG	52.34	-3	46.82	-	52.93	G>A	exon									0.0515907
NM_000238.4:c.2648_2652dup	KCNH2	CasX	CasX_502	7:150948477-150948501	-	GTCGGCAACggcaacGCAAG	TTCA	GTGGCTTCAGTCGGCAACggcaacGCAAGCGCA	-	-5	-	-	-	C>CAACGG	exon
NM_000238.4:c.1655T>C	KCNH2	spCas9	spCas9_503	7:150951728-150951751	+	GCACATGAGCgAGAACAGCA	CGG	GGTGCACATGAGCgAGAACAGCACGGCCGC	57.91	-7	62.79	-	60.86	T>C	exon									0.213061
NM_000322.5:c.920del	PRPH2	spCas9	spCas9_0	6:42698404-42698427	+	CTCCTCTCCAGcGCCAGCCC	TGG	ACGCTCCTCTCCAGcGCCAGCCCTGGCTCT	36.55	-6	59.09	-	70.69	GT>G	exon									0.0552283
NM_000322.5:c.920del	PRPH2	spCas9	spCas9_1	6:42698410-42698433	-	GCGAGAGCCAGGGCTGGCgC	TGG	AGAGCGAGAGCCAGGGCTGGCgCTGGAGAG	37.65	2	55.4	-	67.72	GT>G	exon									0.0321657
NM_000322.5:c.920del	PRPH2	CasX	CasX_3	6:42698386-42698410	+	AGGTCTCCGGCACGCTCCTC	TTCC	AGGCCTTCCAGGTCTCCGGCACGCTCCTCTCCA	-	7	-	-	-	GT>G	exon
NM_000322.5:c.469G>A	PRPH2	spCas9	spCas9_4	6:42721849-42721872	+	CTCGATCTGCAGCATGTtGA	TGG	GAACTCGATCTGCAGCATGTtGATGGTCTT	46.73	1	46.12	-	43.73	G>A	exon									0.0159653
NM_000322.5:c.469G>A	PRPH2	CasX	CasX_5	6:42721860-42721884	-	TGAAGAAGACCATCaACATG	TTCA	GGTGTTTCATGAAGAAGACCATCaACATGCTGC	-	-5	-	-	-	G>A	exon
NM_000322.5:c.469G>A	PRPH2	Cas12a	Cas12a_6	6:42721843-42721868	+	AACTCGATCTGCAGCATGTtG	TTTG	CAGCATTTGAACTCGATCTGCAGCATGTtGATGG	-	2	-	69.24	-	G>A	exon
NM_000322.5:c.469G>A	PRPH2	Cas12a	Cas12a_7	6:42721860-42721885	-	ATGAAGAAGACCATCaACATG	TTTC	AGGTGTTTCATGAAGAAGACCATCaACATGCTGC	-	-3	-	69.63	-	G>A	exon
NM_000322.5:c.494G>A	PRPH2	spCas9	spCas9_8	6:42721834-42721857	-	CAGATCGAGTTCAAATaCTG	CGG	CTGCAGATCGAGTTCAAATaCTGCGGCAAC	63.22	-1	57.91	-	52.72	G>A	exon									0.206294
NM_000322.5:c.626T>A	PRPH2	spCas9	spCas9_9	6:42704544-42704567	+	TAGGATTGCAGCAGCTGAAA	GGG	AGCTAGGATTGCAGCAGCTGAAAGGGtCGC	51.68	7	63.36	-	53.11	T>A	exon									0.183837
NM_000322.5:c.80C>T	PRPH2	spCas9	spCas9_10	6:42722246-42722269	-	CATGAACTGGTTCTtCGTGT	TGG	GCTCATGAACTGGTTCTtCGTGTTGGCTGG	36.93	-3	50.19	-	53.83	C>T	exon									-0.0106782
NM_000322.5:c.535T>C	PRPH2	spCas9	spCas9_12	6:42721797-42721820	-	GGGACTGGTTTGAGATTCAG	cGG	TTCGGGACTGGTTTGAGATTCAGcGGATCA	59.75	4	48.34	-	56.37	T>C	exon									0.106203
NM_000322.5:c.535T>C	PRPH2	saCas9	saCas9_13	6:42721780-42721807	+	CAGGTAGCGATTGCTGATCCg	CTGAAT	GTCCAGGTAGCGATTGCTGATCCgCTGAATCTCA	-	3	-	-	58.32	T>C	exon
NM_000322.5:c.535T>C	PRPH2	saCas9	saCas9_14	6:42721795-42721822	-	TCGGGACTGGTTTGAGATTCA	GcGGAT	TTTTCGGGACTGGTTTGAGATTCAGcGGATCAGC	-	5	-	-	55.87	T>C	exon
NM_000322.5:c.535T>C	PRPH2	CasX	CasX_15	6:42721799-42721823	-	GGACTGGTTTGAGATTCAGc	TTCG	CGGTTTTCGGGACTGGTTTGAGATTCAGcGGAT	-	1	-	-	-	T>C	exon
NM_000322.5:c.535T>C	PRPH2	Cas12a	Cas12a_16	6:42721799-42721824	-	GGGACTGGTTTGAGATTCAGc	TTTC	ACGGTTTTCGGGACTGGTTTGAGATTCAGcGGAT	-	3	-	49.45	-	T>C	exon
NM_000322.5:c.548_551dup	PRPH2	spCas9	spCas9_17	6:42721761-42721784	+	CTTCTTTGGAGGAAAAGTCC	AGg	TGACTTCTTTGGAGGAAAAGTCCAGgtagc	56.84	6	53.57	-	54.37	C>CATCG	exon									0.132916
NM_000322.5:c.548_551dup	PRPH2	spCas9	spCas9_18	6:42721778-42721801	-	TCAGCAATCGCTACgctacC	TGG	GGATCAGCAATCGCTACgctacCTGGACTT	42.19	2	56.15	-	59.35	C>CATCG	exon									0.0673269
NM_000322.5:c.548_551dup	PRPH2	CasX	CasX_19	6:42721762-42721786	+	TTGGAGGAAAAGTCCAGgta	TTCT	TTGACTTCTTTGGAGGAAAAGTCCAGgtagcGT	-	-2	-	-	-	C>CATCG	exon
NM_000322.5:c.548_551dup	PRPH2	CasX	CasX_20	6:42721786-42721810	-	GTGGATCAGCAATCGCTACg	TTCA	TGAGATTCAGTGGATCAGCAATCGCTACgctac	-	5	-	-	-	C>CATCG	exon
NM_000322.5:c.548_551dup	PRPH2	Cas12a	Cas12a_21	6:42721756-42721781	+	ACTTCTTTGGAGGAAAAGTCC	TTTG	CACTCTTTGACTTCTTTGGAGGAAAAGTCCAGgt	-	6	-	36.32	-	C>CATCG	exon
NM_000322.5:c.578_579del	PRPH2	spCas9	spCas9_23	6:42721745-42721768	+	GCCACTCACTcTGACTTCTT	TGG	GAAGCCACTCACTcTGACTTCTTTGGAGGA	23.85	-7	5.91	-	62.59	GAA>G	exon									-0.453993
NM_000322.5:c.578_579del	PRPH2	spCas9	spCas9_24	6:42721745-42721768	-	TCCAAAGAAGTCAgAGTGAG	TGG	TCCTCCAAAGAAGTCAgAGTGAGTGGCTTC	64.38	-4	49	-	67.89	GAA>G	exon									0.135085
NM_000322.5:c.578_579del	PRPH2	saCas9	saCas9_25	6:42721751-42721778	-	GGACTTTTCCTCCAAAGAAGT	CAgAGT	CCTGGACTTTTCCTCCAAAGAAGTCAgAGTGAGT	-	6	-	-	54.04	GAA>G	exon
NM_000322.5:c.578_579del	PRPH2	CasX	CasX_27	6:42721748-42721772	-	TCCAAAGAAGTCAgAGTGAG	TTCC	GACTTTTCCTCCAAAGAAGTCAgAGTGAGTGGC	-	-6	-	-	-	GAA>G	exon
NM_000322.5:c.578_579del	PRPH2	Cas12a	Cas12a_28	6:42721748-42721773	-	CTCCAAAGAAGTCAgAGTGAG	TTTC	GGACTTTTCCTCCAAAGAAGTCAgAGTGAGTGGC	-	-4	-	44.6	-	GAA>G	exon
NM_000322.5:c.589A>G	PRPH2	spCas9	spCas9_29	6:42704591-42704614	-	AAGTCGAATCgAGAGCAACG	TGG	TTTAAGTCGAATCgAGAGCAACGTGGATGG	69.67	-7	56.67	-	84.09	A>G	exon									0.224085
NM_000322.5:c.589A>G	PRPH2	saCas9	saCas9_30	6:42704589-42704616	-	TTAAGTCGAATCgAGAGCAAC	GTGGAT	CCTTTAAGTCGAATCgAGAGCAACGTGGATGGGC	-	-6	-	-	79.45	A>G	exon
NM_000322.5:c.589A>G	PRPH2	CasX	CasX_31	6:42704598-42704622	-	CTTTAAGTCGAATCgAGAGC	TTCC	TCTGTTTCCCTTTAAGTCGAATCgAGAGCAACG	-	-5	-	-	-	A>G	exon
NM_000322.5:c.589A>G	PRPH2	Cas12a	Cas12a_32	6:42704598-42704623	-	CCTTTAAGTCGAATCgAGAGC	TTTC	GTCTGTTTCCCTTTAAGTCGAATCgAGAGCAACG	-	-3	-	34.65	-	A>G	exon
NM_000322.5:c.458A>G	PRPH2	spCas9	spCas9_33	6:42721875-42721898	-	CCCCTGGCAGGTGTTTCATG	AgG	ACACCCCTGGCAGGTGTTTCATGAgGAAGA	59.56	5	48.3	-	63.38	A>G	exon									0.102631
NM_000322.5:c.692C>G	PRPH2	spCas9	spCas9_34	6:42704488-42704511	+	ACTGTAGTGTGCTcAGTTGT	TGG	GTAACTGTAGTGTGCTcAGTTGTTGGTGAT	30.52	-4	33.29	-	56.43	C>G	exon									-0.187904
NM_000322.5:c.441del	PRPH2	spCas9	spCas9_35	6:42721873-42721896	+	CTTCTTCATGAAACACCTGC	cGG	GGTCTTCTTCATGAAACACCTGCcGGGGTG	45.22	4	46.63	-	72.99	GT>G	exon									0.00245246
NM_000322.5:c.441del	PRPH2	spCas9	spCas9_38	6:42721891-42721914	-	CTACCGGGACACAGACACCC	CgG	GTACTACCGGGACACAGACACCCCgGCAGG	54.94	5	69.18	-	73.11	GT>G	exon									0.24463
NM_000322.5:c.441del	PRPH2	saCas9	saCas9_40	6:42721872-42721899	+	TCTTCTTCATGAAACACCTGC	cGGGGT	TGGTCTTCTTCATGAAACACCTGCcGGGGTGTCT	-	4	-	-	73.8	GT>G	exon
NM_000322.5:c.441del	PRPH2	CasX	CasX_41	6:42721874-42721898	+	TCATGAAACACCTGCcGGGG	TTCT	TGGTCTTCTTCATGAAACACCTGCcGGGGTGTC	-	-4	-	-	-	GT>G	exon
NM_000322.5:c.581+1G>A	PRPH2	spCas9	spCas9_43	6:42721745-42721768	-	CAAAGAAGTCAAAGAaTGAG	TGG	CTCCAAAGAAGTCAAAGAaTGAGTGGCTTC	64.8	-2	68.68	-	54.05	G>A	exon									0.303739
NM_000322.5:c.581+1G>A	PRPH2	saCas9	saCas9_44	6:42721747-42721774	-	TTCCTCCAAAGAAGTCAAAGA	aTGAGT	CTTTTCCTCCAAAGAAGTCAAAGAaTGAGTGGCT	-	4	-	-	61	G>A	exon
NM_000322.5:c.581+1G>A	PRPH2	CasX	CasX_45	6:42721750-42721774	-	TCCAAAGAAGTCAAAGAaTG	TTCC	GACTTTTCCTCCAAAGAAGTCAAAGAaTGAGTG	-	-2	-	-	-	G>A	exon
NM_000322.5:c.581+1G>A	PRPH2	Cas12a	Cas12a_46	6:42721750-42721775	-	CTCCAAAGAAGTCAAAGAaTG	TTTC	GGACTTTTCCTCCAAAGAAGTCAAAGAaTGAGTG	-	1	-	52.79	-	G>A	exon
NM_000322.5:c.202G>A	PRPH2	spCas9	spCas9_47	6:42722130-42722153	-	CCAACTCATTGATAGGGATG	aGG	TGCCCAACTCATTGATAGGGATGaGGGTGC	62.12	4	47.72	-	61.26	G>A	exon									0.11341
NM_000322.5:c.202G>A	PRPH2	saCas9	saCas9_49	6:42722128-42722155	-	GCCCAACTCATTGATAGGGAT	GaGGGT	TGTGCCCAACTCATTGATAGGGATGaGGGTGCTA	-	5	-	-	59.78	G>A	exon
NM_000322.5:c.202G>A	PRPH2	Cas12a	Cas12a_50	6:42722135-42722160	-	TGCCCAACTCATTGATAGGGA	TTTG	GCCATTTTGTGCCCAACTCATTGATAGGGATGaG	-	6	-	44.74	-	G>A	exon
NM_000322.5:c.914_922del	PRPH2	spCas9	spCas9_51	6:42698396-42698419	+	CCGGCACGCTCCTCTCCaCC	TGG	TCTCCGGCACGCTCCTCTCCaCCTGGCTCT	59.76	1	64.06	-	54.09	TCGTCGGTCG>T	exon									0.236351
NM_000322.5:c.914_922del	PRPH2	spCas9	spCas9_52	6:42698413-42698436	-	GGAATCTGAGAGCGAGAGCC	AGG	CGAGGAATCTGAGAGCGAGAGCCAGGtGGA	62.13	7	52.28	-	56.41	TCGTCGGTCG>T	exon									0.152481
NM_000322.5:c.914_922del	PRPH2	CasX	CasX_55	6:42698386-42698410	+	AGGTCTCCGGCACGCTCCTC	TTCC	AGGCCTTCCAGGTCTCCGGCACGCTCCTCTCCa	-	5	-	-	-	TCGTCGGTCG>T	exon
NM_000322.5:c.371del	PRPH2	spCas9	spCas9_56	6:42721963-42721986	-	TCTCTGCTGCTTTCTGCTTC	GGG	GGCTCTCTGCTGCTTTCTGCTTCGGGcTCG	52.91	7	49.82	-	67.29	CG>C	exon									0.0752268
NM_000322.5:c.904G>T	PRPH2	spCas9	spCas9_58	6:42698422-42698445	-	GGAATCTGAGAGCtAGAGCC	AGG	CGAGGAATCTGAGAGCtAGAGCCAGGGCTG	68.51	-4	63.88	-	72.52	G>T	exon									0.280204
NM_000322.5:c.828+3A>T	PRPH2	spCas9	spCas9_60	6:42704359-42704382	-	CTCATTTGGCTCTTCGAGGT	tGG	CTCCTCATTTGGCTCTTCGAGGTtGGCCCT	32.99	4	41.93	-	58.72	A>T	intron									-0.103101
NM_000322.5:c.828+3A>T	PRPH2	Cas12a	Cas12a_63	6:42704353-42704378	-	GCTCTTCGAGGTtGGCCCTGG	TTTG	CCTCATTTGGCTCTTCGAGGTtGGCCCTGGGCCA	-	-6	-	39.37	-	A>T	intron
NM_000322.5:c.249C>A	PRPH2	spCas9	spCas9_64	6:42722075-42722098	-	GAAGATCTGCTAaGACGCCC	TGG	TGGGAAGATCTGCTAaGACGCCCTGGACCC	56.54	-5	64.56	-	76.67	C>A	exon									0.214834
NM_000322.5:c.249C>A	PRPH2	CasX	CasX_65	6:42722091-42722115	-	ACTCGCTGGCTGGGAAGATC	TTCA	GTGTCTTCAACTCGCTGGCTGGGAAGATCTGCT	-	7	-	-	-	C>A	exon
NM_000322.5:c.421T>C	PRPH2	spCas9	spCas9_66	6:42721893-42721916	+	CAGGGGTGTCTGTGTCCCGG	TgG	TGCCAGGGGTGTCTGTGTCCCGGTgGTACT	53.81	5	62.57	-	56.6	T>C	exon									0.188674
NM_000322.5:c.421T>C	PRPH2	spCas9	spCas9_67	6:42721908-42721931	-	AGAACGGCATGAAGTACcAC	CGG	TCAAGAACGGCATGAAGTACcACCGGGACA	51.54	1	64.64	-	53.68	T>C	exon									0.193384
NM_000322.5:c.637T>A	PRPH2	spCas9	spCas9_69	6:42704543-42704566	+	CTAGGATTGCAGCtGCTGAA	AGG	GAGCTAGGATTGCAGCtGCTGAAAGGGACG	44.3	-4	41.81	-	51.91	T>A	exon									-0.0361545
NM_000322.5:c.824_825del	PRPH2	spCas9	spCas9_71	6:42704363-42704386	-	ACGCTCCTCATTTGGCTCTg	AGG	GTCACGCTCCTCATTTGGCTCTgAGGTAGG	38.09	3	23.22	-	62.36	GCT>G	exon									-0.228519
NM_000322.5:c.422A>G	PRPH2	spCas9	spCas9_73	6:42721890-42721913	+	TGCCAGGGGTGTCTGTGTCC	CGG	ACCTGCCAGGGGTGTCTGTGTCCCGGcAGT	40.05	7	59.49	-	66.86	A>G	exon									0.0800689
NM_000322.5:c.422A>G	PRPH2	spCas9	spCas9_74	6:42721908-42721931	-	AGAACGGCATGAAGTACTgC	CGG	TCAAGAACGGCATGAAGTACTgCCGGGACA	50.07	2	63.96	-	54.19	A>G	exon									0.179071
NM_000322.5:c.730A>C	PRPH2	spCas9	spCas9_76	6:42704442-42704465	+	TGCAGCCACGCACCCACAGG	TgG	CCCTGCAGCCACGCACCCACAGGTgGAGCT	55.68	5	66.23	-	75.74	A>C	exon									0.223856
NM_000322.5:c.730A>C	PRPH2	spCas9	spCas9_77	6:42704454-42704477	-	AGACGGAGGAGCTCcACCTG	TGG	ACCAGACGGAGGAGCTCcACCTGTGGGTGC	60.61	-3	56.41	-	50.77	A>C	exon									0.179343
NM_000322.5:c.730A>C	PRPH2	saCas9	saCas9_79	6:42704452-42704479	-	CCAGACGGAGGAGCTCcACCT	GTGGGT	CCACCAGACGGAGGAGCTCcACCTGTGGGTGCGT	-	-2	-	-	46.21	A>C	exon
NM_000322.5:c.633_658del	PRPH2	spCas9	spCas9_80	6:42704517-42704540	+	GATACTGGATGCAGGGCcAA	AGG	TCTGATACTGGATGCAGGGCcAAAGGGACG	49.05	1	42.64	-	63.98	GCACCGCTCGATCCTAACGTCGTCGAC>G	exon									-0.00534162
NM_000322.5:c.633_658del	PRPH2	spCas9	spCas9_82	6:42704532-42704555	-	CCTGGTGGACGGCGTCCCTT	TgG	GTACCTGGTGGACGGCGTCCCTTTgGCCCT	23.78	5	27.74	-	56.75	GCACCGCTCGATCCTAACGTCGTCGAC>G	exon									-0.272933
NM_000322.5:c.537G>A	PRPH2	saCas9	saCas9_83	6:42721780-42721807	+	CAGGTAGCGATTGCTGATtCA	CTGAAT	GTCCAGGTAGCGATTGCTGATtCACTGAATCTCA	-	1	-	-	61.54	G>A	exon
NM_000322.5:c.537G>A	PRPH2	saCas9	saCas9_84	6:42721795-42721822	-	TCGGGACTGGTTTGAGATTCA	GTGaAT	TTTTCGGGACTGGTTTGAGATTCAGTGaATCAGC	-	7	-	-	54.84	G>A	exon
NM_000322.5:c.537G>A	PRPH2	CasX	CasX_85	6:42721799-42721823	-	GGACTGGTTTGAGATTCAGT	TTCG	CGGTTTTCGGGACTGGTTTGAGATTCAGTGaAT	-	3	-	-	-	G>A	exon
NM_000322.5:c.537G>A	PRPH2	Cas12a	Cas12a_86	6:42721799-42721824	-	GGGACTGGTTTGAGATTCAGT	TTTC	ACGGTTTTCGGGACTGGTTTGAGATTCAGTGaAT	-	5	-	55.02	-	G>A	exon
NM_000322.5:c.732C>G	PRPH2	spCas9	spCas9_87	6:42704454-42704477	-	AGACGGAGGAGCTCAAgCTG	TGG	ACCAGACGGAGGAGCTCAAgCTGTGGGTGC	59.18	-1	63.52	-	63.86	C>G	exon									0.225551
NM_000322.5:c.732C>G	PRPH2	saCas9	saCas9_89	6:42704452-42704479	-	CCAGACGGAGGAGCTCAAgCT	GTGGGT	CCACCAGACGGAGGAGCTCAAgCTGTGGGTGCGT	-	1	-	-	56.71	C>G	exon
NM_000322.5:c.545dup	PRPH2	spCas9	spCas9_90	6:42721778-42721801	-	GGATCAGCAATatCGCTACC	TGG	AGTGGATCAGCAATatCGCTACCTGGACTT	54.73	-5	58.01	-	56.31	T>TA	exon									0.156585
NM_000322.5:c.545dup	PRPH2	CasX	CasX_91	6:42721762-42721786	+	TTGGAGGAAAAGTCCAGGTA	TTCT	TTGACTTCTTTGGAGGAAAAGTCCAGGTAGCGa	-	5	-	-	-	T>TA	exon
NM_000322.5:c.545dup	PRPH2	CasX	CasX_92	6:42721783-42721807	-	GTGGATCAGCAATatCGCTA	TTCA	TGAGATTCAGTGGATCAGCAATatCGCTACCTG	-	-5	-	-	-	T>TA	exon
NM_000322.5:c.545dup	PRPH2	Cas12a	Cas12a_93	6:42721765-42721790	+	GAGGAAAAGTCCAGGTAGCGa	TTTG	ACTTCTTTGGAGGAAAAGTCCAGGTAGCGatATT	-	3	-	66.43	-	T>TA	exon
NM_000322.5:c.545dup	PRPH2	Cas12a	Cas12a_94	6:42721789-42721814	-	AGATTCAGTGGATCAGCAATa	TTTG	ACTGGTTTGAGATTCAGTGGATCAGCAATatCGC	-	4	-	71.14	-	T>TA	exon
NM_000322.5:c.509del	PRPH2	spCas9	spCas9_95	6:42721818-42721841	-	TGCTGCGGCAACAACGtTTT	CGG	AAATGCTGCGGCAACAACGtTTTCGGGACT	17.71	-1	2.64	-	44.84	TG>T	exon									-0.511253
NM_000322.5:c.509del	PRPH2	CasX	CasX_98	6:42721823-42721847	-	AATGCTGCGGCAACAACGtT	TTCA	TCGAGTTCAAATGCTGCGGCAACAACGtTTTCG	-	-1	-	-	-	TG>T	exon
NM_000322.5:c.629C>T	PRPH2	spCas9	spCas9_99	6:42704544-42704567	+	TAGGATTGCAGCAGCTGAAA	aGG	AGCTAGGATTGCAGCAGCTGAAAaGGACGC	41.69	4	49.71	-	57.2	C>T	exon									0.0120616
NM_000322.5:c.633C>A	PRPH2	spCas9	spCas9_100	6:42704543-42704566	+	CTAGGATTGCAGCAGCTtAA	AGG	GAGCTAGGATTGCAGCAGCTtAAAGGGACG	31.45	1	23.97	-	54.33	C>A	exon									-0.258564
NM_000322.5:c.686_689del	PRPH2	spCas9	spCas9_102	6:42704484-42704507	+	CGTAACTGTAGTGTGCTGAg	TGG	GGTCGTAACTGTAGTGTGCTGAgTGGTGAT	57.36	3	46.69	-	60.3	CAACA>C	exon									0.0775063
NM_000322.5:c.738G>A	PRPH2	spCas9	spCas9_103	6:42704439-42704462	+	CCCTGCAGCCACGCACtCAC	AGG	CAGCCCTGCAGCCACGCACtCACAGGTTGA	65.42	-1	54.54	-	74.26	G>A	exon									0.184801
NM_000322.5:c.738G>A	PRPH2	spCas9	spCas9_104	6:42704446-42704469	-	GAGCTCAACCTGTGaGTGCG	TGG	GAGGAGCTCAACCTGTGaGTGCGTGGCTGC	63.66	-3	60.94	-	74.94	G>A	exon									0.227025
NM_000322.5:c.738G>A	PRPH2	saCas9	saCas9_105	6:42704452-42704479	-	CCAGACGGAGGAGCTCAACCT	GTGaGT	CCACCAGACGGAGGAGCTCAACCTGTGaGTGCGT	-	7	-	-	59.73	G>A	exon
NM_000322.5:c.721G>T	PRPH2	spCas9	spCas9_106	6:42704457-42704480	+	ACAGGTTGAGCTCCTaCGTC	TGG	CCCACAGGTTGAGCTCCTaCGTCTGGTGGT	46.69	-2	57.28	-	61.96	G>T	exon									0.102037
NM_000322.5:c.721G>T	PRPH2	spCas9	spCas9_108	6:42704468-42704491	-	CAGTTACGACCACCAGACGt	AGG	CTACAGTTACGACCACCAGACGtAGGAGCT	57.56	3	62.66	-	63.81	G>T	exon									0.209054
NM_000322.5:c.584_588del	PRPH2	spCas9	spCas9_109	6:42704592-42704615	+	CCACGTTGCTCTtGACTTAA	AGG	CATCCACGTTGCTCTtGACTTAAAGGGAAA	24.23	-5	1.75	-	54.14	ACTAAG>A	exon									-0.483446
NM_000322.5:c.584_588del	PRPH2	spCas9	spCas9_111	6:42704591-42704614	-	CCTTTAAGTCaAGAGCAACG	TGG	TTCCCTTTAAGTCaAGAGCAACGTGGATGG	62.66	-7	62.97	-	59.45	ACTAAG>A	exon									0.242632
NM_000322.5:c.584_588del	PRPH2	saCas9	saCas9_112	6:42704589-42704616	-	TCCCTTTAAGTCaAGAGCAAC	GTGGAT	GTTTCCCTTTAAGTCaAGAGCAACGTGGATGGGC	-	-6	-	-	68.94	ACTAAG>A	exon
NM_000322.5:c.634A>G	PRPH2	spCas9	spCas9_113	6:42704543-42704566	+	CTAGGATTGCAGCAGCcGAA	AGG	GAGCTAGGATTGCAGCAGCcGAAAGGGACG	54.7	-1	46.28	-	56.36	A>G	exon									0.0598429
NM_000322.5:c.634A>G	PRPH2	spCas9	spCas9_115	6:42704557-42704580	-	CTGGTGGACGGCGTCCCTTT	CgG	TACCTGGTGGACGGCGTCCCTTTCgGCTGC	23.57	5	5.85	-	62.13	A>G	exon									-0.455977
NM_000322.5:c.828+1G>T	PRPH2	spCas9	spCas9_116	6:42704359-42704382	-	CTCATTTGGCTCTTCGAGtT	AGG	CTCCTCATTTGGCTCTTCGAGtTAGGCCCT	35.82	2	25.29	-	62.7	G>T	exon									-0.224803
NM_000322.5:c.518A>C	PRPH2	spCas9	spCas9_119	6:42721795-42721818	+	GATCCACTGAATCTCAAACC	AGg	GCTGATCCACTGAATCTCAAACCAGgCCCG	61.53	6	77.32	-	51.44	A>C	exon									0.356611
NM_000322.5:c.518A>C	PRPH2	spCas9	spCas9_120	6:42721817-42721840	-	CTGCGGCAACAACGGTTTTC	GGG	ATGCTGCGGCAACAACGGTTTTCGGGcCTG	56.05	7	47.65	-	56.28	A>C	exon									0.0790052
NM_000322.5:c.594C>G	PRPH2	spCas9	spCas9_122	6:42704598-42704621	-	TCCCTTTAAGTCGAATCAAG	AGg	GTTTCCCTTTAAGTCGAATCAAGAGgAACG	55.38	6	30.94	-	68.07	C>G	exon									-0.0660333
NM_000322.5:c.594C>G	PRPH2	saCas9	saCas9_126	6:42704589-42704616	-	TTAAGTCGAATCAAGAGgAAC	GTGGAT	CCTTTAAGTCGAATCAAGAGgAACGTGGATGGGC	-	-1	-	-	79.96	C>G	exon
NM_000322.5:c.594C>G	PRPH2	CasX	CasX_127	6:42704598-42704622	-	CTTTAAGTCGAATCAAGAGg	TTCC	TCTGTTTCCCTTTAAGTCGAATCAAGAGgAACG	-	1	-	-	-	C>G	exon
NM_000322.5:c.594C>G	PRPH2	Cas12a	Cas12a_128	6:42704598-42704623	-	CCTTTAAGTCGAATCAAGAGg	TTTC	GTCTGTTTCCCTTTAAGTCGAATCAAGAGgAACG	-	3	-	39.46	-	C>G	exon
NM_000322.5:c.708C>G	PRPH2	spCas9	spCas9_130	6:42704483-42704506	-	CAACTCAGCACACTACAGTT	AgG	CAACAACTCAGCACACTACAGTTAgGACCA	45.91	5	43.13	-	62.39	C>G	exon									-0.0191082
NM_000322.5:c.666C>A	PRPH2	spCas9	spCas9_131	6:42704509-42704532	+	GGTGATCTGATACTGGATtC	AGG	GTTGGTGATCTGATACTGGATtCAGGGCCG	44.45	2	49.82	-	68.38	C>A	exon									0.0256313
NM_000322.5:c.666C>A	PRPH2	saCas9	saCas9_134	6:42704524-42704551	-	CAATCCTAGCTCGCCACGGCC	CTGaAT	CTGCAATCCTAGCTCGCCACGGCCCTGaATCCAG	-	7	-	-	75.32	C>A	exon
NM_000322.5:c.935_939dup	PRPH2	spCas9	spCas9_135	6:42698377-42698400	+	AGAAAGGCCTTCCAGGTCTc	cgg	TCCAGAAAGGCCTTCCAGGTCTccggcaCC	50.12	3	44.71	-	49.79	G>GGCCGT	exon									0.0222525
NM_000322.5:c.935_939dup	PRPH2	spCas9	spCas9_137	6:42698395-42698418	-	GGAGAGGAGCGTGCCGGtgc	cgg	GCTGGAGAGGAGCGTGCCGGtgccggAGAC	35.06	6	38.31	-	59.48	G>GGCCGT	exon									-0.121076
NM_000322.5:c.52del	PRPH2	spCas9	spCas9_140	6:42722262-42722285	+	AGTTCATGAGCCAGAGCCCT	tGG	ACCAGTTCATGAGCCAGAGCCCTtGGCCAA	52.63	4	55.37	-	70.82	AC>A	exon									0.118204
NM_000322.5:c.52del	PRPH2	spCas9	spCas9_141	6:42722278-42722301	-	GAAGCGGGTCAAGTTGGCCa	AGG	GAAGAAGCGGGTCAAGTTGGCCaAGGGCTC	60.13	3	53.85	-	60.44	AC>A	exon									0.152529
NM_000322.5:c.52del	PRPH2	CasX	CasX_144	6:42722264-42722288	+	TGAGCCAGAGCCCTtGGCCA	TTCA	ACCAGTTCATGAGCCAGAGCCCTtGGCCAACTT	-	-5	-	-	-	AC>A	exon
NM_000322.5:c.282_286dup	PRPH2	spCas9	spCas9_145	6:42722026-42722049	+	AGCCAGGTACGGCTTCAGCC	AGg	GATAGCCAGGTACGGCTTCAGCCAGggctt	60.29	6	60.59	-	76	C>CCGAAG	exon									0.204197
NM_000322.5:c.282_286dup	PRPH2	spCas9	spCas9_148	6:42722043-42722066	-	CCAGATGGAAGCCgaagccC	TGG	ATGCCAGATGGAAGCCgaagccCTGGCTGA	57.68	2	71.99	-	66.35	C>CCGAAG	exon									0.285776
NM_000322.5:c.302del	PRPH2	spCas9	spCas9_149	6:42722010-42722033	+	TGAAGAGAACACAGATAGCC	AGg	TGTTGAAGAGAACACAGATAGCCAGgACGG	67.21	6	65.71	-	54.19	CA>C	exon									0.293284
NM_000322.5:c.302del	PRPH2	spCas9	spCas9_151	6:42722027-42722050	-	AGCCCTGGCTGAAGCCGTcC	TGG	GGAAGCCCTGGCTGAAGCCGTcCTGGCTAT	50.35	2	67.69	-	51.55	CA>C	exon									0.212209
NM_000322.5:c.440dup	PRPH2	spCas9	spCas9_152	6:42721876-42721899	+	CTTCATGAAACACCTGCCag	AGG	CTTCTTCATGAAACACCTGCCagAGGGGTG	60.19	2	49.27	-	78.31	T>TC	exon									0.109733
NM_000322.5:c.440dup	PRPH2	spCas9	spCas9_155	6:42721891-42721914	-	CCGGGACACAGACACCCCTc	tGG	CTACCGGGACACAGACACCCCTctGGCAGG	57.97	4	46.19	-	62.93	T>TC	exon									0.0761412
NM_000322.5:c.440dup	PRPH2	saCas9	saCas9_157	6:42721875-42721902	+	TCTTCATGAAACACCTGCCag	AGGGGT	TCTTCTTCATGAAACACCTGCCagAGGGGTGTCT	-	2	-	-	79.05	T>TC	exon
NM_000322.5:c.440dup	PRPH2	CasX	CasX_158	6:42721874-42721898	+	TCATGAAACACCTGCCagAG	TTCT	TGGTCTTCTTCATGAAACACCTGCCagAGGGGT	-	-3	-	-	-	T>TC	exon
NM_000322.5:c.647C>G	PRPH2	CasX	CasX_160	6:42704538-42704562	-	GCTGCTGCAATCgTAGCTCG	TTCA	TCCCTTTCAGCTGCTGCAATCgTAGCTCGCCAC	-	-7	-	-	-	C>G	exon
NM_000322.5:c.647C>G	PRPH2	Cas12a	Cas12a_161	6:42704538-42704563	-	AGCTGCTGCAATCgTAGCTCG	TTTC	GTCCCTTTCAGCTGCTGCAATCgTAGCTCGCCAC	-	-5	-	49.84	-	C>G	exon
NM_000322.5:c.288del	PRPH2	spCas9	spCas9_162	6:42722026-42722049	+	AGCCAGGTACGGCTTCAGCC	aGG	GATAGCCAGGTACGGCTTCAGCCaGGCTTC	61.19	4	67.51	-	65.77	TC>T	exon									0.269516
NM_000322.5:c.288del	PRPH2	spCas9	spCas9_163	6:42722043-42722066	-	AAGTATGCCAGATGGAAGCC	tGG	GCCAAGTATGCCAGATGGAAGCCtGGCTGA	63.06	4	67.55	-	82.27	TC>T	exon									0.275705
NM_000322.5:c.612C>G	PRPH2	spCas9	spCas9_164	6:42704576-42704599	-	CAACGTGGATGGGCGGTAgC	TGG	GAGCAACGTGGATGGGCGGTAgCTGGTGGA	36.38	2	25.6	-	64.29	C>G	exon									-0.219475
NM_000322.5:c.751_758del	PRPH2	spCas9	spCas9_167	6:42704412-42704435	+	GGCTGCTGTAGTAGCTCAGC	AGg	TGAGGCTGCTGTAGTAGCTCAGCAGgGCAG	63.07	6	72.27	-	48.98	CCGTCGGGA>C	exon									0.324761
NM_000322.5:c.751_758del	PRPH2	CasX	CasX_169	6:42704405-42704429	+	TGAGGCTGCTGTAGTAGCTC	TTCA	TGGAGTTCATGAGGCTGCTGTAGTAGCTCAGCA	-	7	-	-	-	CCGTCGGGA>C	exon
NM_000322.5:c.228del	PRPH2	spCas9	spCas9_170	6:42722085-42722108	+	CGTAGCAGATCTTCCCAGCC	AgG	CGTCGTAGCAGATCTTCCCAGCCAgGAGTT	58.76	5	62.4	-	72.25	CG>C	exon									0.211329
NM_000322.5:c.228del	PRPH2	spCas9	spCas9_171	6:42722102-42722125	-	TATCCTGTGTCTTCAACTCc	TGG	TGCTATCCTGTGTCTTCAACTCcTGGCTGG	48.97	3	61.34	-	60.32	CG>C	exon									0.149232
NM_000322.5:c.228del	PRPH2	saCas9	saCas9_174	6:42722084-42722111	+	TCGTAGCAGATCTTCCCAGCC	AgGAGT	GCGTCGTAGCAGATCTTCCCAGCCAgGAGTTGAA	-	5	-	-	74.59	CG>C	exon
NM_000322.5:c.389T>C	PRPH2	spCas9	spCas9_175	6:42721925-42721948	+	CCGTTCTTGAGCCCTTGGCC	CgG	ATGCCGTTCTTGAGCCCTTGGCCCgGGGTG	39.39	5	46.14	-	62.4	T>C	exon									-0.0323018
NM_000322.5:c.389T>C	PRPH2	spCas9	spCas9_178	6:42721943-42721966	-	GGGCTCGCTGGAGAACACCC	cGG	TCGGGGCTCGCTGGAGAACACCCcGGGCCA	46.73	4	57.75	-	58.71	T>C	exon									0.107129
NM_000322.5:c.389T>C	PRPH2	saCas9	saCas9_182	6:42721924-42721951	+	GCCGTTCTTGAGCCCTTGGCC	CgGGGT	CATGCCGTTCTTGAGCCCTTGGCCCgGGGTGTTC	-	5	-	-	62.68	T>C	exon
NM_000322.5:c.389T>C	PRPH2	CasX	CasX_183	6:42721919-42721943	+	TGCCGTTCTTGAGCCCTTGG	TTCA	AGTACTTCATGCCGTTCTTGAGCCCTTGGCCCg	-	5	-	-	-	T>C	exon
NM_000322.5:c.389T>C	PRPH2	CasX	CasX_185	6:42721946-42721970	-	GGGCTCGCTGGAGAACACCC	TTCG	TCTGCTTCGGGGCTCGCTGGAGAACACCCcGGG	-	2	-	-	-	T>C	exon
NM_000322.5:c.634A>C	PRPH2	spCas9	spCas9_186	6:42704538-42704561	+	GCGAGCTAGGATTGCAGCAG	CgG	GTGGCGAGCTAGGATTGCAGCAGCgGAAAG	50.55	5	49.36	-	64.17	A>C	exon									0.0586489
NM_000322.5:c.641_652del	PRPH2	spCas9	spCas9_189	6:42704532-42704555	-	TCCCTTTCAGCTGCTcGCCA	CGG	GCGTCCCTTTCAGCTGCTcGCCACGGCCCT	43.62	-2	55.78	-	76.78	CTCGATCCTAACG>C	exon									0.0672961
NM_000322.5:c.639C>G	PRPH2	spCas9	spCas9_190	6:42704543-42704566	+	CTAGGATTGCAcCAGCTGAA	AGG	GAGCTAGGATTGCAcCAGCTGAAAGGGACG	44.67	-6	34.8	-	54.54	C>G	exon									-0.0925024
NM_000322.5:c.639C>G	PRPH2	spCas9	spCas9_192	6:42704553-42704576	-	TGGACGGCGTCCCTTTCAGC	TGg	TGGTGGACGGCGTCCCTTTCAGCTGgTGCA	46.29	6	37.56	-	71.19	C>G	exon									-0.0654254
NM_000322.5:c.700del	PRPH2	saCas9	saCas9_193	6:42704477-42704504	+	TGGTGGTCGTAACTGtGTGTG	CTGAGT	GTCTGGTGGTCGTAACTGtGTGTGCTGAGTTGTT	-	-3	-	-	68.5	AT>A	exon
NM_000322.5:c.582-1G>C	PRPH2	spCas9	spCas9_194	6:42704597-42704620	+	TTGCTCTTGATTCGAgTTAA	AGG	ACGTTGCTCTTGATTCGAgTTAAAGGGAAA	26.21	-2	8.57	-	83.47	G>C	intron									-0.424719
NM_000322.5:c.582-1G>C	PRPH2	saCas9	saCas9_196	6:42704605-42704632	-	AGCTGTCTGTTTCCCTTTAAc	TCGAAT	TCCAGCTGTCTGTTTCCCTTTAAcTCGAATCAAG	-	3	-	-	59.57	G>C	intron
NM_000322.5:c.737G>A	PRPH2	spCas9	spCas9_197	6:42704439-42704462	+	CCCTGCAGCCACGCACCtAC	AGG	CAGCCCTGCAGCCACGCACCtACAGGTTGA	59.52	1	58.72	-	73.41	G>A	exon									0.18511
NM_000322.5:c.737G>A	PRPH2	spCas9	spCas9_198	6:42704453-42704476	-	GACGGAGGAGCTCAACCTGT	aGG	CCAGACGGAGGAGCTCAACCTGTaGGTGCG	49.47	4	51.28	-	51.12	G>A	exon									0.0721413
NM_000322.5:c.74_77del	PRPH2	spCas9	spCas9_200	6:42722246-42722269	-	GGCTCATGAACTcTCCGTGT	TGG	TCTGGCTCATGAACTcTCCGTGTTGGCTGG	46.05	-5	47.27	-	77.33	CTTGG>C	exon									0.0112309
NM_000322.5:c.74_77del	PRPH2	saCas9	saCas9_201	6:42722234-42722261	+	ATGATGATGCCAGCCAACACG	GAgAGT	AAGATGATGATGCCAGCCAACACGGAgAGTTCAT	-	6	-	-	79.17	CTTGG>C	exon
NM_000322.5:c.63G>A	PRPH2	spCas9	spCas9_202	6:42722262-42722285	+	AGTTCATGAGtCAGAGCCCT	TGG	ACCAGTTCATGAGtCAGAGCCCTTGGGCCA	56.84	-7	49.1	-	56.95	G>A	exon									0.0953365
NM_000322.5:c.63G>A	PRPH2	spCas9	spCas9_203	6:42722259-42722282	-	AAGGGCTCTGaCTCATGAAC	TGG	CCCAAGGGCTCTGaCTCATGAACTGGTTCT	59.26	-7	61.16	-	56.72	G>A	exon									0.208767
NM_000322.5:c.259_266del	PRPH2	spCas9	spCas9_204	6:42722050-42722073	+	CTTCCATCTGGCATACTTgC	AGG	GGGCTTCCATCTGGCATACTTgCAGGGCGT	50.06	2	42.67	-	66.47	CCGACCCAG>C	exon									2.77275e-05
NM_000322.5:c.259_266del	PRPH2	CasX	CasX_206	6:42722039-42722063	+	GCCAGGGCTTCCATCTGGCA	TTCA	ACGGCTTCAGCCAGGGCTTCCATCTGGCATACT	-	7	-	-	-	CCGACCCAG>C	exon
NM_000322.5:c.1A>T	PRPH2	spCas9	spCas9_208	6:42722330-42722353	-	CGGACTACACTTGGCAAGCt	TGG	ACCCGGACTACACTTGGCAAGCtTGGCGCT	36.66	3	42.84	-	76.53	A>T	5utr									-0.0796684
NM_000322.5:c.409G>C	PRPH2	spCas9	spCas9_209	6:42721905-42721928	+	TGTCCCGGTAGTACTTCATG	CgG	CTGTGTCCCGGTAGTACTTCATGCgGTTCT	56.9	5	71.87	-	53.19	G>C	exon									0.284257
NM_000322.5:c.828+1G>A	PRPH2	spCas9	spCas9_210	6:42704359-42704382	-	CTCATTTGGCTCTTCGAGaT	AGG	CTCCTCATTTGGCTCTTCGAGaTAGGCCCT	50.14	2	25.27	-	57.78	G>A	exon									-0.140081
NM_000322.5:c.382_385dup	PRPH2	spCas9	spCas9_213	6:42721926-42721949	+	CGTTCTTGAGCCCTTGGCCC	AGG	TGCCGTTCTTGAGCCCTTGGCCCAGGgtgt	58.74	7	59.47	-	57.34	C>CACAA	exon									0.191639
NM_000322.5:c.382_385dup	PRPH2	spCas9	spCas9_215	6:42721943-42721966	-	CGCTGGAGAACACaacacCC	TGG	GCTCGCTGGAGAACACaacacCCTGGGCCA	57.99	1	58.55	-	65.36	C>CACAA	exon									0.177255
NM_000322.5:c.382_385dup	PRPH2	CasX	CasX_218	6:42721928-42721952	+	TGAGCCCTTGGCCCAGGgtg	TTCT	TGCCGTTCTTGAGCCCTTGGCCCAGGgtgttGT	-	-2	-	-	-	C>CACAA	exon
NM_000322.5:c.382_385dup	PRPH2	CasX	CasX_219	6:42721951-42721975	-	GGGCTCGCTGGAGAACACaa	TTCG	TCTGCTTCGGGGCTCGCTGGAGAACACaacacC	-	4	-	-	-	C>CACAA	exon
NM_000322.5:c.858del	PRPH2	spCas9	spCas9_220	6:42698458-42698481	+	ACACCATCCAGCGACGTCTg	AGG	GACACACCATCCAGCGACGTCTgAGGTAGC	49.63	3	34.73	-	69.9	CA>C	exon									-0.0688775
NM_000322.5:c.858del	PRPH2	spCas9	spCas9_221	6:42698464-42698487	-	TGCGCTACCTcAGACGTCGC	TGG	GGCTGCGCTACCTcAGACGTCGCTGGATGG	49.18	-7	51.6	-	63.39	CA>C	exon									0.0693469
NM_000322.5:c.858del	PRPH2	saCas9	saCas9_222	6:42698462-42698489	-	GCTGCGCTACCTcAGACGTCG	CTGGAT	TGGGCTGCGCTACCTcAGACGTCGCTGGATGGTG	-	-6	-	-	60.91	CA>C	exon
NM_000322.5:c.377T>C	PRPH2	spCas9	spCas9_223	6:42721937-42721960	+	CCTTGGCCCAGGGTGTTCTC	CgG	AGCCCTTGGCCCAGGGTGTTCTCCgGCGAG	40.97	5	33.21	-	60.69	T>C	exon									-0.12901
NM_000322.5:c.377T>C	PRPH2	spCas9	spCas9_224	6:42721955-42721978	-	CTTTCTGCTTCGGGGCTCGC	cGG	CTGCTTTCTGCTTCGGGGCTCGCcGGAGAA	33.87	4	7.77	-	61.16	T>C	exon									-0.379899
NM_000322.5:c.377T>C	PRPH2	CasX	CasX_225	6:42721952-42721976	-	GCTTCGGGGCTCGCcGGAGA	TTCT	CTGCTTTCTGCTTCGGGGCTCGCcGGAGAACAC	-	-5	-	-	-	T>C	exon
NM_000322.5:c.377T>C	PRPH2	Cas12a	Cas12a_226	6:42721952-42721977	-	TGCTTCGGGGCTCGCcGGAGA	TTTC	GCTGCTTTCTGCTTCGGGGCTCGCcGGAGAACAC	-	-3	-	23.07	-	T>C	exon
NM_000322.5:c.281G>A	PRPH2	spCas9	spCas9_227	6:42722038-42722061	+	CTTCAGCCAGGGCTTCtATC	TGG	CGGCTTCAGCCAGGGCTTCtATCTGGCATA	43.53	-1	29.28	-	57.4	G>A	exon									-0.145449
NM_000322.5:c.281G>A	PRPH2	spCas9	spCas9_228	6:42722043-42722066	-	AGTATGCCAGATaGAAGCCC	TGG	CCAAGTATGCCAGATaGAAGCCCTGGCTGA	61.98	-5	76.32	-	69.42	G>A	exon									0.34552
NM_000322.5:c.710_720del	PRPH2	spCas9	spCas9_229	6:42704471-42704494	-	AACTCAGCACACTACAGTTA	CGg	AACAACTCAGCACACTACAGTTACGgAGGA	44.37	6	20.83	-	61.69	GGCAGACCACCA>G	exon									-0.211419
NM_000322.5:c.265_268delinsAGGGCC	PRPH2	spCas9	spCas9_231	6:42722046-42722069	+	AGGGCTTCCATCTGGCATAC	Tgg	GCCAGGGCTTCCATCTGGCATACTggccct	33.45	5	31.92	-	75.81	ACCG>CCGGGA	exon									-0.188026
NM_000322.5:c.265_268delinsAGGGCC	PRPH2	saCas9	saCas9_234	6:42722055-42722082	+	ATCTGGCATACTggccctTGG	CTGGGT	TCCATCTGGCATACTggccctTGGCTGGGTCCAG	-	-6	-	-	74.38	ACCG>CCGGGA	exon
NM_000322.5:c.265_268delinsAGGGCC	PRPH2	CasX	CasX_235	6:42722039-42722063	+	GCCAGGGCTTCCATCTGGCA	TTCA	ACGGCTTCAGCCAGGGCTTCCATCTGGCATACT	-	6	-	-	-	ACCG>CCGGGA	exon
NM_000322.5:c.232_233insT	PRPH2	spCas9	spCas9_237	6:42722098-42722121	-	TGTCTTCAACTCGCTGGCtc	TGG	CTGTGTCTTCAACTCGCTGGCtcTGGGAAG	43.1	3	48.84	-	75.17	C>CT	exon									0.0076341
NM_000322.5:c.232_233insT	PRPH2	saCas9	saCas9_239	6:42722087-42722114	+	TAGCAGATCTTCCCAgaGCCA	GCGAGT	TCGTAGCAGATCTTCCCAgaGCCAGCGAGTTGAA	-	-3	-	-	67.61	C>CT	exon
NM_000322.5:c.209dup	PRPH2	CasX	CasX_240	6:42722096-42722120	+	CAGCCAGCGAGTTGAAGACA	TTCC	AGATCTTCCCAGCCAGCGAGTTGAAGACACAGG	-	7	-	-	-	A>AT	exon
NM_000322.5:c.178del	PRPH2	spCas9	spCas9_241	6:42722141-42722164	+	ATCAATGAGTTGGGCaAAAA	TGG	CCTATCAATGAGTTGGGCaAAAATGGCTCT	39.62	-2	26.73	-	61.11	TG>T	exon									-0.190337
NM_000322.5:c.178del	PRPH2	CasX	CasX_242	6:42722148-42722172	-	GAGAGCCATTTTtGCCCAAC	TTCT	AATAATTCTGAGAGCCATTTTtGCCCAACTCAT	-	-7	-	-	-	TG>T	exon
NM_000322.5:c.394del	PRPH2	spCas9	spCas9_243	6:42721925-42721948	+	CCGTTCTTGAGCCCTtGCCC	AGG	ATGCCGTTCTTGAGCCCTtGCCCAGGGTGT	55.85	-2	59.63	-	74.06	AC>A	exon									0.171032
NM_000322.5:c.394del	PRPH2	spCas9	spCas9_245	6:42721936-42721959	-	GCTGGAGAACACCCTGGGCa	AGG	CTCGCTGGAGAACACCCTGGGCaAGGGCTC	53.99	3	54.47	-	63.02	AC>A	exon									0.121092
NM_000322.5:c.394del	PRPH2	saCas9	saCas9_247	6:42721923-42721950	+	TGCCGTTCTTGAGCCCTtGCC	CAGGGT	TCATGCCGTTCTTGAGCCCTtGCCCAGGGTGTTC	-	-1	-	-	75.07	AC>A	exon
NM_000322.5:c.394del	PRPH2	CasX	CasX_248	6:42721919-42721943	+	TGCCGTTCTTGAGCCCTtGC	TTCA	AGTACTTCATGCCGTTCTTGAGCCCTtGCCCAG	-	-2	-	-	-	AC>A	exon
NM_000322.5:c.394del	PRPH2	CasX	CasX_249	6:42721945-42721969	-	GGGCTCGCTGGAGAACACCC	TTCG	TCTGCTTCGGGGCTCGCTGGAGAACACCCTGGG	-	7	-	-	-	AC>A	exon
NM_000322.5:c.62G>A	PRPH2	spCas9	spCas9_250	6:42722262-42722285	+	AGTTCATGAGCtAGAGCCCT	TGG	ACCAGTTCATGAGCtAGAGCCCTTGGGCCA	57.14	-6	48.97	-	52.92	G>A	exon									0.0972416
NM_000322.5:c.860_867del	PRPH2	spCas9	spCas9_252	6:42698447-42698470	+	CGGGGTTGGACACACCATCC	AgG	CCTCGGGGTTGGACACACCATCCAgGTAGG	56.6	5	61.21	-	54	CGCTGCAGA>C	exon									0.194518
NM_000322.5:c.860_867del	PRPH2	spCas9	spCas9_254	6:42698464-42698487	-	ATTGGGCTGCGCTACCTACc	TGG	ACAATTGGGCTGCGCTACCTACcTGGATGG	51.18	3	40.1	-	77.46	CGCTGCAGA>C	exon									-0.0179542
NM_000322.5:c.860_867del	PRPH2	saCas9	saCas9_256	6:42698462-42698489	-	CAATTGGGCTGCGCTACCTAC	cTGGAT	TTACAATTGGGCTGCGCTACCTACcTGGATGGTG	-	4	-	-	65.39	CGCTGCAGA>C	exon
NM_000322.5:c.860_867del	PRPH2	CasX	CasX_257	6:42698442-42698466	+	TCGGGGTTGGACACACCATC	TTCC	TCAGATTCCTCGGGGTTGGACACACCATCCAgG	-	4	-	-	-	CGCTGCAGA>C	exon
NM_000322.5:c.809_810del	PRPH2	spCas9	spCas9_258	6:42704361-42704384	+	CTACCTCGAAGAGCCAAATG	AgG	GGCCTACCTCGAAGAGCCAAATGAgGCGTG	57.55	5	71.27	-	72.42	CCT>C	exon									0.277242
NM_000322.5:c.809_810del	PRPH2	spCas9	spCas9_259	6:42704373-42704396	-	GGGTGTCGTCACGCcTCATT	TGG	CATGGGTGTCGTCACGCcTCATTTGGCTCT	46.11	-3	20.27	-	88.15	CCT>C	exon									-0.21396
NM_000322.5:c.911_912dup	PRPH2	spCas9	spCas9_260	6:42698408-42698431	+	TCTCCAGCAGCCAGCcctCC	TGG	TCCTCTCCAGCAGCCAGCcctCCTGGCTCT	37.95	-2	56.96	-	65.37	G>GGA	exon									0.0474696
NM_000322.5:c.911_912dup	PRPH2	spCas9	spCas9_261	6:42698422-42698445	-	ATCTGAGAGCGAGAGCCAGG	agg	GGAATCTGAGAGCGAGAGCCAGGaggGCTG	54.74	6	65.16	-	56.49	G>GGA	exon									0.215442
NM_000322.5:c.664T>C	PRPH2	spCas9	spCas9_265	6:42704508-42704531	+	TGGTGATCTGATACTGGATG	CgG	TGTTGGTGATCTGATACTGGATGCgGGGCC	48.65	5	57.74	-	66.9	T>C	exon									0.115731
NM_000322.5:c.761T>A	PRPH2	spCas9	spCas9_269	6:42704412-42704435	+	GGCTGCTGTAGTAGCTCAGC	tGG	TGAGGCTGCTGTAGTAGCTCAGCtGGGCAG	56.6	4	64.56	-	48.76	T>A	exon									0.22369
NM_000322.5:c.761T>A	PRPH2	CasX	CasX_271	6:42704405-42704429	+	TGAGGCTGCTGTAGTAGCTC	TTCA	TGGAGTTCATGAGGCTGCTGTAGTAGCTCAGCt	-	5	-	-	-	T>A	exon
NM_000322.5:c.828+2T>C	PRPH2	spCas9	spCas9_272	6:42704363-42704386	-	GCTCCTCATTTGGCTCTTCG	AGG	CACGCTCCTCATTTGGCTCTTCGAGGcAGG	46.85	7	47.66	-	57.47	T>C	intron									0.0251524
NM_000322.5:c.828+2T>C	PRPH2	Cas12a	Cas12a_276	6:42704353-42704378	-	GCTCTTCGAGGcAGGCCCTGG	TTTG	CCTCATTTGGCTCTTCGAGGcAGGCCCTGGGCCA	-	-7	-	41.52	-	T>C	intron
NM_000322.5:c.631T>C	PRPH2	spCas9	spCas9_277	6:42704543-42704566	+	CTAGGATTGCAGCAGCTGAg	AGG	GAGCTAGGATTGCAGCAGCTGAgAGGGACG	54.42	3	58.87	-	54.39	T>C	exon									0.162444
NM_000322.5:c.612C>A	PRPH2	spCas9	spCas9_279	6:42704576-42704599	-	CAACGTGGATGGGCGGTAaC	TGG	GAGCAACGTGGATGGGCGGTAaCTGGTGGA	34.86	2	32.03	-	66.6	C>A	exon									-0.176103
NM_000322.5:c.597del	PRPH2	spCas9	spCas9_282	6:42704591-42704614	-	TAAGTCGAATCAAGAGCAAg	TGG	CTTTAAGTCGAATCAAGAGCAAgTGGATGG	68.69	3	64.58	-	81.98	GC>G	exon									0.284131
NM_000322.5:c.597del	PRPH2	saCas9	saCas9_286	6:42704589-42704616	-	TTTAAGTCGAATCAAGAGCAA	gTGGAT	CCCTTTAAGTCGAATCAAGAGCAAgTGGATGGGC	-	4	-	-	79.04	GC>G	exon
NM_000322.5:c.597del	PRPH2	CasX	CasX_287	6:42704597-42704621	-	CTTTAAGTCGAATCAAGAGC	TTCC	TCTGTTTCCCTTTAAGTCGAATCAAGAGCAAgT	-	4	-	-	-	GC>G	exon
NM_000322.5:c.597del	PRPH2	Cas12a	Cas12a_288	6:42704597-42704622	-	CCTTTAAGTCGAATCAAGAGC	TTTC	GTCTGTTTCCCTTTAAGTCGAATCAAGAGCAAgT	-	6	-	40.28	-	GC>G	exon
NM_000322.5:c.583C>T	PRPH2	spCas9	spCas9_290	6:42704597-42704620	+	TTGCTCTTGATTCaACTTAA	AGG	ACGTTGCTCTTGATTCaACTTAAAGGGAAA	18.03	-4	0.95	-	82.24	C>T	exon									-0.534699
NM_000322.5:c.583C>T	PRPH2	saCas9	saCas9_292	6:42704605-42704632	-	AGCTGTCTGTTTCCCTTTAAG	TtGAAT	TCCAGCTGTCTGTTTCCCTTTAAGTtGAATCAAG	-	5	-	-	57.42	C>T	exon
NM_000322.5:c.638G>C	PRPH2	spCas9	spCas9_293	6:42704533-42704556	+	CCGTGGCGAGCTAGGATTGC	AGg	GGGCCGTGGCGAGCTAGGATTGCAGgAGCT	52.98	6	49.94	-	68.85	G>C	exon									0.0761467
NM_000322.5:c.273T>G	PRPH2	spCas9	spCas9_296	6:42722047-42722070	+	GGGCTTCCATCTGGCcTACT	TGG	CCAGGGCTTCCATCTGGCcTACTTGGCTGG	44.28	-2	36.06	-	66.27	T>G	exon									-0.0879771
NM_000322.5:c.273T>G	PRPH2	spCas9	spCas9_299	6:42722060-42722083	-	CGCCCTGGACCCAGCCAAGT	AgG	CGACGCCCTGGACCCAGCCAAGTAgGCCAG	49.65	5	65.46	-	63.73	T>G	exon									0.186065
NM_000322.5:c.273T>G	PRPH2	saCas9	saCas9_301	6:42722049-42722076	+	GCTTCCATCTGGCcTACTTGG	CTGGGT	AGGGCTTCCATCTGGCcTACTTGGCTGGGTCCAG	-	-5	-	-	70.77	T>G	exon
NM_000322.5:c.273T>G	PRPH2	CasX	CasX_302	6:42722039-42722063	+	GCCAGGGCTTCCATCTGGCc	TTCA	ACGGCTTCAGCCAGGGCTTCCATCTGGCcTACT	-	1	-	-	-	T>G	exon
NM_000322.5:c.515G>A	PRPH2	spCas9	spCas9_303	6:42721817-42721840	-	CTGCGGCAACAACGGTTTTC	aGG	ATGCTGCGGCAACAACGGTTTTCaGGACTG	40.25	4	26.13	-	44.2	G>A	exon									-0.186454
NM_000322.5:c.515G>A	PRPH2	CasX	CasX_305	6:42721824-42721848	-	AATGCTGCGGCAACAACGGT	TTCA	TCGAGTTCAAATGCTGCGGCAACAACGGTTTTC	-	6	-	-	-	G>A	exon
NM_000322.5:c.662C>T	PRPH2	spCas9	spCas9_306	6:42704516-42704539	+	TGATACTGGATGCAGaGCCG	TGG	ATCTGATACTGGATGCAGaGCCGTGGCGAG	57.05	-2	64.68	-	70.82	C>T	exon									0.220575
NM_000322.5:c.465del	PRPH2	Cas12a	Cas12a_307	6:42721843-42721868	+	AACTCGATCTGCAGCATGTCG	TTTG	CAGCATTTGAACTCGATCTGCAGCATGTCGAtGT	-	5	-	67.33	-	AC>A	exon
NM_000322.5:c.465del	PRPH2	Cas12a	Cas12a_308	6:42721859-42721884	-	ATGAAGAAGACaTCGACATGC	TTTC	AGGTGTTTCATGAAGAAGACaTCGACATGCTGCA	-	-7	-	65.36	-	AC>A	exon
NM_000322.5:c.500G>A	PRPH2	spCas9	spCas9_309	6:42721825-42721848	-	TTCAAATGCTGCGaCAACAA	CGG	GAGTTCAAATGCTGCGaCAACAACGGTTTT	38.94	-4	14.88	-	43.55	G>A	exon									-0.286485
NM_000322.5:c.658del	PRPH2	spCas9	spCas9_310	6:42704515-42704538	+	CTGATACTGGATGCAGGGCc	TGG	GATCTGATACTGGATGCAGGGCcTGGCGAG	35.5	3	45.34	-	65.63	GC>G	exon									-0.062523
NM_000322.5:c.658del	PRPH2	spCas9	spCas9_312	6:42704532-42704555	-	TGCTGCAATCCTAGCTCGCC	AgG	AGCTGCTGCAATCCTAGCTCGCCAgGCCCT	51.8	5	69.44	-	62.02	GC>G	exon									0.231866
NM_000322.5:c.658del	PRPH2	saCas9	saCas9_313	6:42704522-42704549	+	TGGATGCAGGGCcTGGCGAGC	TAGGAT	TACTGGATGCAGGGCcTGGCGAGCTAGGATTGCA	-	-6	-	-	61.08	GC>G	exon
NM_000322.5:c.658del	PRPH2	CasX	CasX_314	6:42704537-42704561	-	GCTGCTGCAATCCTAGCTCG	TTCA	TCCCTTTCAGCTGCTGCAATCCTAGCTCGCCAg	-	5	-	-	-	GC>G	exon
NM_000322.5:c.658del	PRPH2	Cas12a	Cas12a_315	6:42704537-42704562	-	AGCTGCTGCAATCCTAGCTCG	TTTC	GTCCCTTTCAGCTGCTGCAATCCTAGCTCGCCAg	-	7	-	54.75	-	GC>G	exon
NM_000322.5:c.514C>T	PRPH2	spCas9	spCas9_316	6:42721818-42721841	-	GCTGCGGCAACAACGGTTTT	tGG	AATGCTGCGGCAACAACGGTTTTtGGGACT	26.28	4	0.11	-	43.67	C>T	exon									-0.481817
NM_000322.5:c.514C>T	PRPH2	CasX	CasX_319	6:42721824-42721848	-	AATGCTGCGGCAACAACGGT	TTCA	TCGAGTTCAAATGCTGCGGCAACAACGGTTTTt	-	5	-	-	-	C>T	exon
NM_000322.5:c.897_898del	PRPH2	spCas9	spCas9_320	6:42698425-42698448	+	TGGCTCTCGCTCtGATTCCT	CGG	CCCTGGCTCTCGCTCtGATTCCTCGGGGTT	36.27	-5	40.48	-	54.63	AGT>A	exon									-0.0946904
NM_000322.5:c.897_898del	PRPH2	saCas9	saCas9_323	6:42698424-42698451	+	CTGGCTCTCGCTCtGATTCCT	CGGGGT	GCCCTGGCTCTCGCTCtGATTCCTCGGGGTTGGA	-	-5	-	-	57.02	AGT>A	exon
NM_000322.5:c.654_655del	PRPH2	spCas9	spCas9_324	6:42704516-42704539	+	TGATACTGGATGCAGGGCCG	TgG	ATCTGATACTGGATGCAGGGCCGTgGAGCT	48.48	5	52.21	-	73.2	CCG>C	exon									0.0673019
NM_000322.5:c.654_655del	PRPH2	spCas9	spCas9_326	6:42704532-42704555	-	CTGCTGCAATCCTAGCTCcA	CGG	CAGCTGCTGCAATCCTAGCTCcACGGCCCT	45.05	2	47.03	-	63.33	CCG>C	exon									0.0076992
NM_000322.5:c.654_655del	PRPH2	saCas9	saCas9_327	6:42704521-42704548	+	CTGGATGCAGGGCCGTgGAGC	TAGGAT	ATACTGGATGCAGGGCCGTgGAGCTAGGATTGCA	-	-2	-	-	89.25	CCG>C	exon
NM_000322.5:c.654_655del	PRPH2	CasX	CasX_328	6:42704536-42704560	-	GCTGCTGCAATCCTAGCTCc	TTCA	TCCCTTTCAGCTGCTGCAATCCTAGCTCcACGG	-	1	-	-	-	CCG>C	exon
NM_000322.5:c.654_655del	PRPH2	Cas12a	Cas12a_329	6:42704536-42704561	-	AGCTGCTGCAATCCTAGCTCc	TTTC	GTCCCTTTCAGCTGCTGCAATCCTAGCTCcACGG	-	3	-	57.88	-	CCG>C	exon
NM_000322.5:c.732C>A	PRPH2	spCas9	spCas9_330	6:42704454-42704477	-	AGACGGAGGAGCTCAAaCTG	TGG	ACCAGACGGAGGAGCTCAAaCTGTGGGTGC	64.99	-1	66.27	-	75.18	C>A	exon									0.278569
NM_000322.5:c.732C>A	PRPH2	saCas9	saCas9_332	6:42704452-42704479	-	CCAGACGGAGGAGCTCAAaCT	GTGGGT	CCACCAGACGGAGGAGCTCAAaCTGTGGGTGCGT	-	1	-	-	65.23	C>A	exon
NM_000322.5:c.948del	PRPH2	spCas9	spCas9_333	6:42698369-42698392	+	CACTCTCCAGAAAGGCCTtC	AGG	TCACACTCTCCAGAAAGGCCTtCAGGTCTC	48.67	2	52.79	-	57.11	AG>A	exon									0.0780863
NM_000322.5:c.948del	PRPH2	spCas9	spCas9_335	6:42698383-42698406	-	GGAGCGTGCCGGAGACCTGa	AGG	AGAGGAGCGTGCCGGAGACCTGaAGGCCTT	63.7	3	68.41	-	64.27	AG>A	exon									0.291997
NM_000322.5:c.948del	PRPH2	CasX	CasX_337	6:42698362-42698386	+	TCACACTCTCCAGAAAGGCC	TTCT	CCAGCTTCTTCACACTCTCCAGAAAGGCCTtCA	-	3	-	-	-	AG>A	exon
NM_000322.5:c.629C>G	PRPH2	spCas9	spCas9_339	6:42704544-42704567	+	TAGGATTGCAGCAGCTGAAA	cGG	AGCTAGGATTGCAGCAGCTGAAAcGGACGC	37.45	4	48.64	-	55.91	C>G	exon									-0.0210425
NM_000322.5:c.643A>C	PRPH2	spCas9	spCas9_340	6:42704529-42704552	+	AGGGCCGTGGCGAGCTAGGA	TgG	TGCAGGGCCGTGGCGAGCTAGGATgGCAGC	43.08	5	54.28	-	63.85	A>C	exon									0.0557456
NM_000322.5:c.868_869del	PRPH2	spCas9	spCas9_341	6:42698465-42698488	-	GCTGCGCTACCTACAGACGT	CGg	TGGGCTGCGCTACCTACAGACGTCGgGATG	49.13	6	46.93	-	74.84	GTC>G	exon									0.0271263
NM_000322.5:c.868_869del	PRPH2	saCas9	saCas9_344	6:42698462-42698489	-	GGCTGCGCTACCTACAGACGT	CGgGAT	TTGGGCTGCGCTACCTACAGACGTCGgGATGGTG	-	6	-	-	70.47	GTC>G	exon
NM_000322.5:c.868_869del	PRPH2	CasX	CasX_345	6:42698442-42698466	+	TCGGGGTTGGACACACCATC	TTCC	TCAGATTCCTCGGGGTTGGACACACCATCcCGA	-	2	-	-	-	GTC>G	exon
NM_000322.5:c.633C>G	PRPH2	spCas9	spCas9_346	6:42704543-42704566	+	CTAGGATTGCAGCAGCTcAA	AGG	GAGCTAGGATTGCAGCAGCTcAAAGGGACG	46.23	1	34.96	-	52.97	C>G	exon									-0.0816229
NM_000322.5:c.631_632insA	PRPH2	spCas9	spCas9_348	6:42704545-42704568	+	AGGATTGCAGCAGCTGatAA	AGG	GCTAGGATTGCAGCAGCTGatAAAGGGACG	45.36	-1	52.22	-	45.68	T>TA	exon									0.0576038
NM_000322.5:c.407del	PRPH2	spCas9	spCas9_350	6:42721924-42721947	-	CCTGGGCCAAGGGCTCAAGA	cGG	CACCCTGGGCCAAGGGCTCAAGAcGGCATG	49.3	4	59.32	-	67.29	CA>C	exon									0.132402
NM_000322.5:c.829-3_829-1del	PRPH2	spCas9	spCas9_351	6:42698489-42698512	+	GCCCAATTGTAATGGTCAcG	TGG	GCAGCCCAATTGTAATGGTCAcGTGGTGGG	57.1	2	52.32	-	61.67	GGAC>G	exon									0.121916
NM_000322.5:c.353GCT[1]	PRPH2	spCas9	spCas9_354	6:42721965-42721988	-	TGGCTCTCTGCTtTCTGCTT	CGG	TTGTGGCTCTCTGCTtTCTGCTTCGGGGCT	13.57	-5	7.65	-	64.13	TTCG>T	exon									-0.500001
NM_000322.5:c.353GCT[1]	PRPH2	CasX	CasX_357	6:42721952-42721976	+	CCAGCGAGCCCCGAAGCAGA	TTCT	GGGTGTTCTCCAGCGAGCCCCGAAGCAGAaAGC	-	2	-	-	-	TTCG>T	exon
NM_000322.5:c.353GCT[1]	PRPH2	CasX	CasX_358	6:42721971-42721995	-	TTGTGGCTCTCTGCTtTCTG	TTCC	TCCTCTTCCTTGTGGCTCTCTGCTtTCTGCTTC	-	-4	-	-	-	TTCG>T	exon
NM_000322.5:c.269_270del	PRPH2	spCas9	spCas9_359	6:42722045-42722068	+	CAGGGCTTCCATCTGGCATa	TGG	AGCCAGGGCTTCCATCTGGCATaTGGCTGG	45.74	3	35.54	-	63.03	TGA>T	exon									-0.0827682
NM_000322.5:c.269_270del	PRPH2	spCas9	spCas9_362	6:42722052-42722075	-	GGACCCAGCCAtATGCCAGA	TGG	CCTGGACCCAGCCAtATGCCAGATGGAAGC	48.66	-6	38.91	-	57.4	TGA>T	exon									-0.0363096
NM_000322.5:c.269_270del	PRPH2	saCas9	saCas9_363	6:42722047-42722074	+	GGGCTTCCATCTGGCATaTGG	CTGGGT	CCAGGGCTTCCATCTGGCATaTGGCTGGGTCCAG	-	-1	-	-	62.23	TGA>T	exon
NM_000322.5:c.269_270del	PRPH2	CasX	CasX_364	6:42722039-42722063	+	GCCAGGGCTTCCATCTGGCA	TTCA	ACGGCTTCAGCCAGGGCTTCCATCTGGCATaTG	-	3	-	-	-	TGA>T	exon
NM_000322.5:c.826G>T	PRPH2	spCas9	spCas9_365	6:42704363-42704386	-	GCTCCTCATTTGGCTCTTCt	AGG	CACGCTCCTCATTTGGCTCTTCtAGGTAGG	37.03	3	20.73	-	53.6	G>T	exon									-0.252518
NM_000322.5:c.749_769delinsCATGA	PRPH2	CasX	CasX_367	6:42704405-42704429	+	TGAGGCTGCTGTAGTtcatg	TTCA	TGGAGTTCATGAGGCTGCTGTAGTtcatgAGCC	-	-4	-	-	-	TCGAGTCGTCCCGTCGGGACG>AGTAC	exon
NM_000322.5:c.626del	PRPH2	spCas9	spCas9_368	6:42704543-42704566	+	CTAGGATTGCAGCAGCTGAA	AGG	GAGCTAGGATTGCAGCAGCTGAAAGGgCGC	35.32	7	44.5	-	46.61	CT>C	exon									-0.0646885
NM_000322.5:c.499G>A	PRPH2	spCas9	spCas9_370	6:42721825-42721848	-	TTCAAATGCTGCaGCAACAA	CGG	GAGTTCAAATGCTGCaGCAACAACGGTTTT	43.24	-5	31.39	-	45.61	G>A	exon									-0.126176
NM_000322.5:c.647C>T	PRPH2	CasX	CasX_371	6:42704538-42704562	-	GCTGCTGCAATCtTAGCTCG	TTCA	TCCCTTTCAGCTGCTGCAATCtTAGCTCGCCAC	-	-7	-	-	-	C>T	exon
NM_000322.5:c.647C>T	PRPH2	Cas12a	Cas12a_372	6:42704538-42704563	-	AGCTGCTGCAATCtTAGCTCG	TTTC	GTCCCTTTCAGCTGCTGCAATCtTAGCTCGCCAC	-	-5	-	50.64	-	C>T	exon
NM_000322.5:c.748T>G	PRPH2	spCas9	spCas9_373	6:42704443-42704466	-	CTCAACCTGTGGGTGCGTGG	CgG	GAGCTCAACCTGTGGGTGCGTGGCgGCAGG	44.09	5	57.3	-	66.37	T>G	exon									0.0857172
NM_000322.5:c.554T>C	PRPH2	spCas9	spCas9_376	6:42721760-42721783	+	ACTTCTTTGGAGGAAAAGTC	CgG	TTGACTTCTTTGGAGGAAAAGTCCgGGTAG	57.94	5	41.62	-	60.47	T>C	exon									0.0390995
NM_000322.5:c.554T>C	PRPH2	spCas9	spCas9_378	6:42721778-42721801	-	GTGGATCAGCAATCGCTACC	cGG	TCAGTGGATCAGCAATCGCTACCcGGACTT	56.17	4	68.76	-	60.76	T>C	exon									0.2521
NM_000322.5:c.554T>C	PRPH2	saCas9	saCas9_379	6:42721758-42721785	+	TGACTTCTTTGGAGGAAAAGT	CCgGGT	CTTTGACTTCTTTGGAGGAAAAGTCCgGGTAGCG	-	6	-	-	66.18	T>C	exon
NM_000322.5:c.554T>C	PRPH2	CasX	CasX_380	6:42721762-42721786	+	TTGGAGGAAAAGTCCgGGTA	TTCT	TTGACTTCTTTGGAGGAAAAGTCCgGGTAGCGA	-	-4	-	-	-	T>C	exon
NM_000322.5:c.554T>C	PRPH2	CasX	CasX_381	6:42721781-42721805	-	GTGGATCAGCAATCGCTACC	TTCA	TGAGATTCAGTGGATCAGCAATCGCTACCcGGA	-	2	-	-	-	T>C	exon
NM_000322.5:c.554T>C	PRPH2	Cas12a	Cas12a_382	6:42721756-42721781	+	ACTTCTTTGGAGGAAAAGTCC	TTTG	CACTCTTTGACTTCTTTGGAGGAAAAGTCCgGGT	-	4	-	31.26	-	T>C	exon
NM_000322.5:c.746del	PRPH2	spCas9	spCas9_384	6:42704439-42704462	-	AACCTGTGGGTGCGTGcTGC	AGG	CTCAACCTGTGGGTGCGTGcTGCAGGGCTG	43.41	-1	58.69	-	77.86	CG>C	exon									0.0896969
NM_000322.5:c.738_741dup	PRPH2	spCas9	spCas9_386	6:42704446-42704469	-	CAACCTGTGGGTGCggtgcG	TGG	GCTCAACCTGTGGGTGCggtgcGTGGCTGC	49.34	2	45.62	-	64.61	C>CGTGG	exon									0.0206841
NM_000322.5:c.738G>C	PRPH2	spCas9	spCas9_389	6:42704439-42704462	+	CCCTGCAGCCACGCACgCAC	AGG	CAGCCCTGCAGCCACGCACgCACAGGTTGA	64.64	-1	68.06	-	68.6	G>C	exon									0.29327
NM_000322.5:c.738G>C	PRPH2	spCas9	spCas9_390	6:42704446-42704469	-	GAGCTCAACCTGTGcGTGCG	TGG	GAGGAGCTCAACCTGTGcGTGCGTGGCTGC	53.09	-3	57.29	-	69.68	G>C	exon									0.137034
NM_000322.5:c.556G>A	PRPH2	spCas9	spCas9_391	6:42721761-42721784	+	CTTCTTTGGAGGAAAAGTtC	AGG	TGACTTCTTTGGAGGAAAAGTtCAGGTAGC	41.56	2	27.13	-	65.94	G>A	exon									-0.17722
NM_000322.5:c.556G>A	PRPH2	CasX	CasX_392	6:42721762-42721786	+	TTGGAGGAAAAGTtCAGGTA	TTCT	TTGACTTCTTTGGAGGAAAAGTtCAGGTAGCGA	-	-6	-	-	-	G>A	exon
NM_000322.5:c.556G>A	PRPH2	CasX	CasX_393	6:42721781-42721805	-	GTGGATCAGCAATCGCTACC	TTCA	TGAGATTCAGTGGATCAGCAATCGCTACCTGaA	-	4	-	-	-	G>A	exon
NM_000322.5:c.556G>A	PRPH2	Cas12a	Cas12a_394	6:42721756-42721781	+	ACTTCTTTGGAGGAAAAGTtC	TTTG	CACTCTTTGACTTCTTTGGAGGAAAAGTtCAGGT	-	2	-	37.89	-	G>A	exon
NM_000322.5:c.458AGA[1]	PRPH2	spCas9	spCas9_395	6:42721849-42721872	+	CTCGATCTGCAGCATGTCGA	TGg	GAACTCGATCTGCAGCATGTCGATGgTCTT	55.83	6	48.46	-	44.15	CAGA>C	exon									0.0880884
NM_000322.5:c.458AGA[1]	PRPH2	Cas12a	Cas12a_396	6:42721843-42721868	+	AACTCGATCTGCAGCATGTCG	TTTG	CAGCATTTGAACTCGATCTGCAGCATGTCGATGg	-	7	-	66.82	-	CAGA>C	exon
NM_000322.5:c.136C>T	PRPH2	spCas9	spCas9_397	6:42722190-42722213	-	TGAAGATTGAACTCtGAAAG	AGG	TCCTGAAGATTGAACTCtGAAAGAGGAGCG	50.93	-3	57.83	-	57.7	C>T	exon									0.132552
NM_000322.5:c.136C>T	PRPH2	saCas9	saCas9_398	6:42722177-42722204	+	TTCATCACATCGCTCCTCTTT	CaGAGT	TTATTCATCACATCGCTCCTCTTTCaGAGTTCAA	-	5	-	-	54.84	C>T	exon
NM_000322.5:c.136C>T	PRPH2	CasX	CasX_399	6:42722177-42722201	+	TCACATCGCTCCTCTTTCaG	TTCA	AATTATTCATCACATCGCTCCTCTTTCaGAGTT	-	-1	-	-	-	C>T	exon
NM_000322.5:c.136C>T	PRPH2	CasX	CasX_400	6:42722193-42722217	-	TGAAGATTGAACTCtGAAAG	TTCC	GACTGTTCCTGAAGATTGAACTCtGAAAGAGGA	-	-5	-	-	-	C>T	exon
NM_000322.5:c.516G>T	PRPH2	spCas9	spCas9_401	6:42721812-42721835	-	GCAACAACGGTTTTCGtGAC	TGG	GCGGCAACAACGGTTTTCGtGACTGGTTTG	46.13	-1	14.19	-	65.96	G>T	exon									-0.257127
NM_000322.5:c.516G>T	PRPH2	CasX	CasX_402	6:42721824-42721848	-	AATGCTGCGGCAACAACGGT	TTCA	TCGAGTTCAAATGCTGCGGCAACAACGGTTTTC	-	7	-	-	-	G>T	exon
NM_000322.5:c.513dup	PRPH2	spCas9	spCas9_403	6:42721818-42721841	-	TGCGGCAACAACGGTTTTCt	cGG	TGCTGCGGCAACAACGGTTTTCtcGGGACT	39.05	4	16.54	-	45.84	C>CT	exon									-0.272879
NM_000322.5:c.513dup	PRPH2	CasX	CasX_406	6:42721826-42721850	-	AATGCTGCGGCAACAACGGT	TTCA	TCGAGTTCAAATGCTGCGGCAACAACGGTTTTC	-	7	-	-	-	C>CT	exon
NM_000322.5:c.518A>T	PRPH2	spCas9	spCas9_407	6:42721817-42721840	-	CTGCGGCAACAACGGTTTTC	GGG	ATGCTGCGGCAACAACGGTTTTCGGGtCTG	56.05	7	41.39	-	49.7	A>T	exon									0.0294832
NM_000322.5:c.584G>T	PRPH2	spCas9	spCas9_409	6:42704597-42704620	+	TTGCTCTTGATTaGACTTAA	AGG	ACGTTGCTCTTGATTaGACTTAAAGGGAAA	19.75	-5	4.95	-	78.15	G>T	exon									-0.490512
NM_000322.5:c.424C>T	PRPH2	spCas9	spCas9_411	6:42721908-42721931	-	AGAACGGCATGAAGTACTAC	tGG	TCAAGAACGGCATGAAGTACTACtGGGACA	53.03	4	61.05	-	56.25	C>T	exon									0.171727
NM_000322.5:c.141_222del	PRPH2	spCas9	spCas9_413	6:42722096-42722119	+	TTCCCAGCCAGCGAGTtTTT	CGG	ATCTTCCCAGCCAGCGAGTtTTTCGGAGTT	16.44	-1	1.74	-	73.14	ACTTCTGTGTCCTATCGTGGGGGTAGGGATAGTTACTCAACCCGTGTTTTACCGAGAGTCTTAATAAGTAGTGTAGCGAGGAG>A	exon									-0.534681
NM_000322.5:c.141_222del	PRPH2	spCas9	spCas9_414	6:42722102-42722125	-	TTGAACTCCGAAAaACTCGC	TGG	AGATTGAACTCCGAAAaACTCGCTGGCTGG	59.07	-4	55.27	-	76.14	ACTTCTGTGTCCTATCGTGGGGGTAGGGATAGTTACTCAACCCGTGTTTTACCGAGAGTCTTAATAAGTAGTGTAGCGAGGAG>A	exon									0.15326
NM_000322.5:c.141_222del	PRPH2	saCas9	saCas9_415	6:42722095-42722122	+	CTTCCCAGCCAGCGAGTtTTT	CGGAGT	GATCTTCCCAGCCAGCGAGTtTTTCGGAGTTCAA	-	-1	-	-	71.46	ACTTCTGTGTCCTATCGTGGGGGTAGGGATAGTTACTCAACCCGTGTTTTACCGAGAGTCTTAATAAGTAGTGTAGCGAGGAG>A	exon
NM_000322.5:c.141_222del	PRPH2	CasX	CasX_416	6:42722096-42722120	+	CAGCCAGCGAGTtTTTCGGA	TTCC	AGATCTTCCCAGCCAGCGAGTtTTTCGGAGTTC	-	-7	-	-	-	ACTTCTGTGTCCTATCGTGGGGGTAGGGATAGTTACTCAACCCGTGTTTTACCGAGAGTCTTAATAAGTAGTGTAGCGAGGAG>A	exon
NM_000322.5:c.141_222del	PRPH2	CasX	CasX_417	6:42722111-42722135	-	TGAAGATTGAACTCCGAAAa	TTCC	GACTGTTCCTGAAGATTGAACTCCGAAAaACTC	-	1	-	-	-	ACTTCTGTGTCCTATCGTGGGGGTAGGGATAGTTACTCAACCCGTGTTTTACCGAGAGTCTTAATAAGTAGTGTAGCGAGGAG>A	exon
NM_000322.5:c.433_434del	PRPH2	spCas9	spCas9_418	6:42721888-42721911	+	CCTGCCAGGGGTgTGTGTCC	CGG	ACACCTGCCAGGGGTgTGTGTCCCGGTAGT	39.45	-5	36.82	-	59.82	CAG>C	exon									-0.107881
NM_000322.5:c.433_434del	PRPH2	spCas9	spCas9_419	6:42721891-42721914	-	ACTACCGGGACACAcACCCC	TGG	AGTACTACCGGGACACAcACCCCTGGCAGG	52.59	-3	64.83	-	63.06	CAG>C	exon									0.198203
NM_000322.5:c.433_434del	PRPH2	CasX	CasX_421	6:42721874-42721898	+	TCATGAAACACCTGCCAGGG	TTCT	TGGTCTTCTTCATGAAACACCTGCCAGGGGTgT	-	4	-	-	-	CAG>C	exon
NM_000322.5:c.423C>A	PRPH2	spCas9	spCas9_423	6:42721908-42721931	-	AGAACGGCATGAAGTACTAa	CGG	TCAAGAACGGCATGAAGTACTAaCGGGACA	43.8	3	46.8	-	58.41	C>A	exon									2.6679e-05
NM_000322.5:c.493T>C	PRPH2	spCas9	spCas9_425	6:42721834-42721857	-	CAGATCGAGTTCAAAcGCTG	CGG	CTGCAGATCGAGTTCAAAcGCTGCGGCAAC	59.77	-2	62.51	-	59.99	T>C	exon									0.221852
NM_000322.5:c.113del	PRPH2	spCas9	spCas9_426	6:42722204-42722227	+	TCAATCTTCAGGAACAGtCT	AGG	AGTTCAATCTTCAGGAACAGtCTAGGCTGA	49.55	1	38.54	-	61.12	AG>A	exon									-0.0353064
NM_000322.5:c.113del	PRPH2	CasX	CasX_427	6:42722196-42722220	+	GAGTTCAATCTTCAGGAACA	TTCG	CCTCTTTCGGAGTTCAATCTTCAGGAACAGtCT	-	3	-	-	-	AG>A	exon
NM_000322.5:c.113del	PRPH2	Cas12a	Cas12a_429	6:42722195-42722220	+	GGAGTTCAATCTTCAGGAACA	TTTC	TCCTCTTTCGGAGTTCAATCTTCAGGAACAGtCT	-	5	-	64.61	-	AG>A	exon
NM_000322.5:c.418_421dup	PRPH2	spCas9	spCas9_430	6:42721890-42721913	+	TGCCAGGGGTGTCTGTGTCC	CGG	ACCTGCCAGGGGTGTCTGTGTCCCGGtagt	40.05	7	53.77	-	78.05	A>ATCAT	exon									0.0295758
NM_000322.5:c.418_421dup	PRPH2	spCas9	spCas9_431	6:42721908-42721931	-	GGCATGAAGTACTAtactaC	CGG	AACGGCATGAAGTACTAtactaCCGGGACA	59.25	2	61.3	-	64.9	A>ATCAT	exon									0.207368
NM_000322.5:c.2T>C	PRPH2	spCas9	spCas9_433	6:42722330-42722353	-	CGGACTACACTTGGCAAGCA	cGG	ACCCGGACTACACTTGGCAAGCAcGGCGCT	49.85	4	46.31	-	80.17	T>C	start_codon									0.024591
NM_000322.5:c.610_623del	PRPH2	spCas9	spCas9_434	6:42704569-42704592	-	TCAAGAGCAACGTGGATGGG	CGG	GAATCAAGAGCAACGTGGATGGGCGGcGTC	44.32	7	49.72	-	78.95	CGGCAGGTGGTCCAT>C	exon									0.0208297
NM_000322.5:c.599T>G	PRPH2	spCas9	spCas9_435	6:42704593-42704616	-	TTAAGTCGAATCAAGAGCAA	CGg	CCTTTAAGTCGAATCAAGAGCAACGgGGAT	44.97	6	29.6	-	78.51	T>G	exon									-0.140863
NM_000322.5:c.599T>G	PRPH2	saCas9	saCas9_441	6:42704589-42704616	-	TTAAGTCGAATCAAGAGCAAC	GgGGAT	CCTTTAAGTCGAATCAAGAGCAACGgGGATGGGC	-	5	-	-	79.27	T>G	exon
NM_000322.5:c.599T>G	PRPH2	CasX	CasX_442	6:42704598-42704622	-	CTTTAAGTCGAATCAAGAGC	TTCC	TCTGTTTCCCTTTAAGTCGAATCAAGAGCAACG	-	6	-	-	-	T>G	exon
NM_000322.5:c.599T>G	PRPH2	Cas12a	Cas12a_443	6:42704592-42704617	-	AGTCGAATCAAGAGCAACGgG	TTTA	TTCCCTTTAAGTCGAATCAAGAGCAACGgGGATG	-	2	-	35.54	-	T>G	exon
NM_000322.5:c.592A>C	PRPH2	spCas9	spCas9_444	6:42704591-42704614	-	AAGTCGAATCAAGcGCAACG	TGG	TTTAAGTCGAATCAAGcGCAACGTGGATGG	64.77	-4	59.39	-	80.29	A>C	exon									0.219099
NM_000322.5:c.592A>C	PRPH2	saCas9	saCas9_445	6:42704589-42704616	-	TTAAGTCGAATCAAGcGCAAC	GTGGAT	CCTTTAAGTCGAATCAAGcGCAACGTGGATGGGC	-	-3	-	-	76.63	A>C	exon
NM_000322.5:c.592A>C	PRPH2	CasX	CasX_446	6:42704598-42704622	-	CTTTAAGTCGAATCAAGcGC	TTCC	TCTGTTTCCCTTTAAGTCGAATCAAGcGCAACG	-	-2	-	-	-	A>C	exon
NM_000322.5:c.592A>C	PRPH2	Cas12a	Cas12a_447	6:42704598-42704623	-	CCTTTAAGTCGAATCAAGcGC	TTTC	GTCTGTTTCCCTTTAAGTCGAATCAAGcGCAACG	-	1	-	34.03	-	A>C	exon
NM_000322.5:c.582-2A>T	PRPH2	spCas9	spCas9_449	6:42704597-42704620	+	TTGCTCTTGATTCGACaTAA	AGG	ACGTTGCTCTTGATTCGACaTAAAGGGAAA	23.88	-1	9.34	-	83.85	A>T	intron									-0.432064
NM_000322.5:c.582-2A>T	PRPH2	saCas9	saCas9_451	6:42704605-42704632	-	AGCTGTCTGTTTCCCTTTAtG	TCGAAT	TCCAGCTGTCTGTTTCCCTTTAtGTCGAATCAAG	-	2	-	-	58.73	A>T	intron
NM_000322.5:c.646_649delinsGG	PRPH2	spCas9	spCas9_452	6:42704543-42704566	-	GTCCCTTTCAGCTGCTGCAA	Tgg	GGCGTCCCTTTCAGCTGCTGCAATggGCTC	35.06	6	23.54	-	63.33	ATCC>GG	exon									-0.243825
NM_000322.5:c.646_649delinsGG	PRPH2	CasX	CasX_455	6:42704536-42704560	-	GCTGCTGCAATggGCTCGCC	TTCA	TCCCTTTCAGCTGCTGCAATggGCTCGCCACGG	-	-7	-	-	-	ATCC>GG	exon
NM_000322.5:c.646_649delinsGG	PRPH2	Cas12a	Cas12a_456	6:42704536-42704561	-	AGCTGCTGCAATggGCTCGCC	TTTC	GTCCCTTTCAGCTGCTGCAATggGCTCGCCACGG	-	-5	-	46.15	-	ATCC>GG	exon
NM_000322.5:c.571G>T	PRPH2	spCas9	spCas9_457	6:42721747-42721770	+	CACTCACTCTTTGACTTaTT	TGG	AGCCACTCACTCTTTGACTTaTTTGGAGGA	19.42	1	3.84	-	56.86	G>T	exon									-0.495081
NM_000322.5:c.571G>T	PRPH2	saCas9	saCas9_459	6:42721751-42721778	-	ACTTTTCCTCCAAAtAAGTCA	AAGAGT	TGGACTTTTCCTCCAAAtAAGTCAAAGAGTGAGT	-	-4	-	-	67.42	G>T	exon
NM_015665.6:c.709C>T	AAAS	spCas9	spCas9_0	12:53309682-53309705	+	CCCAGGGTGAGACAGCACTT	aGG	ATGCCCAGGGTGAGACAGCACTTaGGCACA	45.53	4	47.96	-	73.01	C>T	exon									0.0151991
NM_015665.6:c.43C>T	AAAS	spCas9	spCas9_1	12:53321410-53321433	+	TATAGGGTGACTTaACCCCG	AGG	TCATATAGGGTGACTTaACCCCGAGGCGGT	64.87	-4	66.03	-	85.7	C>T	exon									0.272688
NM_015665.6:c.43C>T	AAAS	CasX	CasX_3	12:53321423-53321447	-	CTCCTCCACCGCCTCGGGGT	TTCC	GGTTGTTCCCTCCTCCACCGCCTCGGGGTtAAG	-	2	-	-	-	C>T	exon
NM_015665.6:c.1320dup	AAAS	spCas9	spCas9_4	12:53308050-53308073	-	GTGTTTGAGCgcTCCTTCCC	TGG	CCTGTGTTTGAGCgcTCCTTCCCTGGTAAG	45.35	-6	54.78	-	65.96	C>CG	exon									0.0724365
NM_015665.6:c.500C>T	AAAS	spCas9	spCas9_5	12:53314786-53314809	+	CAGGGCCACTaCAAACTTGT	TGG	TAGCAGGGCCACTaCAAACTTGTTGGTGTG	36.81	-7	34.35	-	63.89	C>T	intron									-0.144826
NM_015665.6:c.500C>T	AAAS	spCas9	spCas9_6	12:53314790-53314813	-	CCACACCAACAAGTTTGtAG	TGG	CCCCCACACCAACAAGTTTGtAGTGGCCCT	54.41	1	32.89	-	58.58	C>T	intron									-0.0527385
NM_015665.6:c.433C>T	AAAS	spCas9	spCas9_7	12:53315087-53315110	+	CACTCACCAATTTGTGACTT	aGG	GTGCACTCACCAATTTGTGACTTaGGCAAA	45.28	4	21.15	-	76.31	C>T	exon									-0.207942
NM_015665.6:c.856C>T	AAAS	spCas9	spCas9_8	12:53309222-53309245	+	CACCCCACCTCCTCaGAACC	AGG	GGTCACCCCACCTCCTCaGAACCAGGGAAG	70.6	-3	79.99	-	64.99	C>T	exon									0.427274
NM_015665.6:c.856C>T	AAAS	spCas9	spCas9_10	12:53309231-53309254	-	GTCCCCCTTCCCTGGTTCtG	AGG	TGTGTCCCCCTTCCCTGGTTCtGAGGAGGT	40.04	2	39.46	-	66.03	C>T	exon									-0.0846077
NM_015665.6:c.856C>T	AAAS	saCas9	saCas9_15	12:53309222-53309249	-	CCTTCCCTGGTTCtGAGGAGG	TGGGGT	CCCCCTTCCCTGGTTCtGAGGAGGTGGGGTGACC	-	-5	-	-	65.03	C>T	exon
NM_015665.6:c.618del	AAAS	spCas9	spCas9_16	12:53314355-53314378	+	ACAGCCAAGACAGaGCACTA	AGG	GCCACAGCCAAGACAGaGCACTAAGGGGCT	52.02	-4	34.97	-	63.54	TC>T	exon									-0.0510464
NM_015665.6:c.618del	AAAS	spCas9	spCas9_19	12:53314358-53314381	-	AGCCCCTTAGTGCtCTGTCT	TGG	GGAAGCCCCTTAGTGCtCTGTCTTGGCTGT	41.05	-4	33.86	-	61.19	TC>T	exon									-0.123346
NM_015665.6:c.1264_1273del	AAAS	spCas9	spCas9_20	12:53308096-53308119	+	GAGGATGACTGGTtTACCCT	TGG	AAGGAGGATGACTGGTtTACCCTTGGCTTT	49.02	-4	65.4	-	74.21	AATGGTAGGAC>A	exon									0.178708
NM_015665.6:c.1264_1273del	AAAS	CasX	CasX_21	12:53308080-53308104	+	AGTGCGAAAAAGGAGGATGA	TTCG	GCTGTTTCGAGTGCGAAAAAGGAGGATGACTGG	-	7	-	-	-	AATGGTAGGAC>A	exon
NM_015665.6:c.1264_1273del	AAAS	CasX	CasX_22	12:53308108-53308132	-	TACAGGAAAGCCAAGGGTAa	TTCT	TCCATTTCTTACAGGAAAGCCAAGGGTAaACCA	-	1	-	-	-	AATGGTAGGAC>A	exon
NM_015665.6:c.1264_1273del	AAAS	Cas12a	Cas12a_23	12:53308108-53308133	-	TTACAGGAAAGCCAAGGGTAa	TTTC	ATCCATTTCTTACAGGAAAGCCAAGGGTAaACCA	-	3	-	27.68	-	AATGGTAGGAC>A	exon
NM_015665.6:c.580C>T	AAAS	spCas9	spCas9_24	12:53314395-53314418	+	ACGCCACATTTCaCTGCAGC	CGG	GAGACGCCACATTTCaCTGCAGCCGGTGCT	51.98	-5	21.23	-	66.47	C>T	exon									-0.165269
NM_015665.6:c.580C>T	AAAS	spCas9	spCas9_25	12:53314397-53314420	-	GCACCGGCTGCAGtGAAATG	TGG	GAAGCACCGGCTGCAGtGAAATGTGGCGTC	48.43	-4	65.63	-	64.97	C>T	exon									0.179982
NM_015665.6:c.580C>T	AAAS	CasX	CasX_26	12:53314382-53314406	+	AGGCCAGAGACGCCACATTT	TTCC	GGGGCTTCCAGGCCAGAGACGCCACATTTCaCT	-	3	-	-	-	C>T	exon
NM_015665.6:c.1416+1G>A	AAAS	saCas9	saCas9_27	12:53307838-53307865	-	AAAGGGGCCCTGCTCAGTGTG	aTGAGT	AACAAAGGGGCCCTGCTCAGTGTGaTGAGTGCGC	-	4	-	-	72.37	G>A	exon
NM_015665.6:c.1416+1G>A	AAAS	CasX	CasX_28	12:53307847-53307871	-	ACAAAGGGGCCCTGCTCAGT	TTCA	CTTCCTTCAACAAAGGGGCCCTGCTCAGTGTGa	-	5	-	-	-	G>A	exon
NM_015665.6:c.852G>A	AAAS	spCas9	spCas9_29	12:53309222-53309245	+	CACCCCACCTCCTCGGAAtC	AGG	GGTCACCCCACCTCCTCGGAAtCAGGGAAG	51.09	2	56.44	-	61.37	G>A	exon									0.120924
NM_015665.6:c.852G>A	AAAS	spCas9	spCas9_35	12:53309231-53309254	-	GTCCCCCTTCCCTGaTTCCG	AGG	TGTGTCCCCCTTCCCTGaTTCCGAGGAGGT	49.39	-3	49.93	-	65.28	G>A	exon									0.0562476
NM_015665.6:c.771del	AAAS	spCas9	spCas9_37	12:53309627-53309650	+	CTGAGAGCAGCCgCCCCCAC	TGG	AAGCTGAGAGCAGCCgCCCCCACTGGGGGC	42.23	-5	45.28	-	76.87	CG>C	exon									-0.0272533
NM_015665.6:c.771del	AAAS	spCas9	spCas9_40	12:53309639-53309662	-	TTGGCCTGGGCCCCCAGTGG	GGG	AGCTTGGCCTGGGCCCCCAGTGGGGGcGGC	28	7	41.9	-	67.09	CG>C	exon									-0.134957
NM_015665.6:c.211del	AAAS	spCas9	spCas9_42	12:53320590-53320613	+	CTTGCTCCCGGTGAtGATGA	AGG	ACACTTGCTCCCGGTGAtGATGAAGGCAGT	52.22	-3	60.47	-	54.5	AC>A	exon									0.16277
NM_015665.6:c.211del	AAAS	spCas9	spCas9_43	12:53320596-53320619	-	AGAACTGCCTTCATCaTCAC	CGG	ACAAGAACTGCCTTCATCaTCACCGGGAGC	62	-2	50.28	-	57.2	AC>A	exon									0.13502
NM_015665.6:c.211del	AAAS	CasX	CasX_45	12:53320583-53320607	+	ACACTTGCTCCCGGTGAtGA	TTCC	ATCTCTTCCACACTTGCTCCCGGTGAtGATGAA	-	-2	-	-	-	AC>A	exon
NM_015665.6:c.1024C>T	AAAS	spCas9	spCas9_46	12:53308778-53308801	+	AACAGCAGTCaGCTGCCATC	TGG	GTGAACAGCAGTCaGCTGCCATCTGGGCTC	52.66	-7	45.06	-	86.89	C>T	exon									0.0286168
NM_015665.6:c.508del	AAAS	spCas9	spCas9_47	12:53314767-53314790	+	CACGGACTGAGTCATCTAGC	aGG	ACACACGGACTGAGTCATCTAGCaGGCCAC	68.38	4	67.44	-	60.01	TC>T	intron									0.312563
NM_015665.6:c.355C>T	AAAS	spCas9	spCas9_48	12:53315373-53315396	-	GGGCCCTGGCACTCTGTtGA	TGG	GCTGGGCCCTGGCACTCTGTtGATGGGCCT	33.82	1	20.56	-	61.8	C>T	exon									-0.275108
NM_015665.6:c.355C>T	AAAS	saCas9	saCas9_50	12:53315360-53315387	+	TGGAGGGAAGAGGCCCATCaA	CAGAGT	CCATGGAGGGAAGAGGCCCATCaACAGAGTGCCA	-	2	-	-	72.13	C>T	exon
NM_015665.6:c.1310_1311del	AAAS	spCas9	spCas9_51	12:53308051-53308074	+	CCAGGGAAGGAGCTCAAACA	cGG	TTACCAGGGAAGGAGCTCAAACAcGGCTGT	63.77	4	70.29	-	60.8	GTC>G	exon									0.308937
NM_015665.6:c.1310_1311del	AAAS	saCas9	saCas9_52	12:53308058-53308085	+	AGGAGCTCAAACAcGGCTGTT	TCGAGT	GGAAGGAGCTCAAACAcGGCTGTTTCGAGTGCGA	-	-5	-	-	66.86	GTC>G	exon
NM_015665.6:c.1310_1311del	AAAS	CasX	CasX_53	12:53308065-53308089	-	CACTCGAAACAGCCgTGTTT	TTCG	CCTTTTTCGCACTCGAAACAGCCgTGTTTGAGC	-	-5	-	-	-	GTC>G	exon
NM_015665.6:c.1310_1311del	AAAS	Cas12a	Cas12a_54	12:53308065-53308090	-	GCACTCGAAACAGCCgTGTTT	TTTC	TCCTTTTTCGCACTCGAAACAGCCgTGTTTGAGC	-	-3	-	50.36	-	GTC>G	exon
NM_015665.6:c.762del	AAAS	spCas9	spCas9_55	12:53309628-53309651	+	TGAGAGCAGCCGCCCCCCAC	tGG	AGCTGAGAGCAGCCGCCCCCCACtGGGGCC	39.92	4	41.41	-	69.04	AC>A	exon									-0.070173
NM_015665.6:c.762del	AAAS	spCas9	spCas9_59	12:53309643-53309666	-	CAGCTTGGCCTGGGCCCCaG	TGG	TACCAGCTTGGCCTGGGCCCCaGTGGGGGG	34.93	2	37.1	-	66.74	AC>A	exon									-0.134006
NM_015665.6:c.479A>G	AAAS	spCas9	spCas9_65	12:53314794-53314817	+	CTGCAAACTTGTTGGTGTGG	GGG	CCACTGCAAACTTGTTGGTGTGGGGGcGCC	40.63	7	27.91	-	66.23	A>G	intron									-0.176304
NM_015665.6:c.956G>A	AAAS	spCas9	spCas9_66	12:53308986-53309009	+	ACCTCTCACAAGTCtACATC	TGG	GCCACCTCTCACAAGTCtACATCTGGGCCT	64.49	-3	44.66	-	67.39	G>A	exon									0.100155
NM_015665.6:c.712del	AAAS	spCas9	spCas9_68	12:53309680-53309703	+	TGCCCAGGGTGAGACAGCaT	TGG	GTATGCCCAGGGTGAGACAGCaTTGGGCAC	45.15	2	51.97	-	67.53	TG>T	exon									0.0476637
NM_015665.6:c.712del	AAAS	CasX	CasX_70	12:53309690-53309714	-	GGCTGTGCCCAAtGCTGTCT	TTCT	CCCTCTTCTGGCTGTGCCCAAtGCTGTCTCACC	-	-7	-	-	-	TG>T	exon
NM_015665.6:c.211_214dup	AAAS	spCas9	spCas9_71	12:53320578-53320601	+	ATCTCTTCCACACTTGCTCC	CGG	TGCATCTCTTCCACACTTGCTCCCGGtgat	47.27	7	48.3	-	81.65	A>ACTAC	exon									0.0254965
NM_015665.6:c.211_214dup	AAAS	spCas9	spCas9_73	12:53320596-53320619	-	GCCTTCATCCATCAcatcaC	CGG	ACTGCCTTCATCCATCAcatcaCCGGGAGC	58.22	2	39.68	-	56.04	A>ACTAC	exon									0.0261116
NM_015665.6:c.211_214dup	AAAS	saCas9	saCas9_75	12:53320587-53320614	+	ACACTTGCTCCCGGtgatgTG	ATGGAT	TCCACACTTGCTCCCGGtgatgTGATGGATGAAG	-	-4	-	-	58.23	A>ACTAC	exon
NM_015665.6:c.211_214dup	AAAS	CasX	CasX_76	12:53320583-53320607	+	ACACTTGCTCCCGGtgatgT	TTCC	ATCTCTTCCACACTTGCTCCCGGtgatgTGATG	-	-5	-	-	-	A>ACTAC	exon
NM_015665.6:c.500C>A	AAAS	spCas9	spCas9_77	12:53314786-53314809	+	CAGGGCCACTtCAAACTTGT	TGG	TAGCAGGGCCACTtCAAACTTGTTGGTGTG	35.61	-7	22.98	-	66.25	C>A	intron									-0.246122
NM_015665.6:c.500C>A	AAAS	spCas9	spCas9_78	12:53314790-53314813	-	CCACACCAACAAGTTTGaAG	TGG	CCCCCACACCAACAAGTTTGaAGTGGCCCT	62.16	1	33	-	59.8	C>A	intron									-0.00707596
NM_015665.6:c.1357_1358dup	AAAS	spCas9	spCas9_79	12:53307880-53307903	+	GGAAAGTGATGAGCTGGGGC	TGg	GATGGAAAGTGATGAGCTGGGGCTGggcGG	43.46	6	38.83	-	69.13	C>CCG	exon									-0.0708232
NM_015665.6:c.887C>A	AAAS	spCas9	spCas9_83	12:53309182-53309205	+	CCAGGATTTTGCTGCCGTCT	GGG	TAGCCAGGATTTTGCTGCCGTCTGGGtACC	56.64	7	42.02	-	74.24	C>A	exon									0.0306252
NM_015665.6:c.887C>A	AAAS	spCas9	spCas9_85	12:53309195-53309218	-	AACCTGCTCTGGTaCCCAGA	CGG	ACCAACCTGCTCTGGTaCCCAGACGGCAGC	49.06	-4	48.82	-	64.11	C>A	exon									0.0455459
NM_015665.6:c.887C>A	AAAS	Cas12a	Cas12a_86	12:53309189-53309214	+	CTGCCGTCTGGGtACCAGAGC	TTTG	AGGATTTTGCTGCCGTCTGGGtACCAGAGCAGGT	-	-6	-	26.79	-	C>A	exon
NM_015665.6:c.250del	AAAS	spCas9	spCas9_87	12:53320563-53320586	-	TGGAAGAGATGCATCAACAT	TgG	GTGTGGAAGAGATGCATCAACATTgGTGAG	40.2	5	26.13	-	74.94	GT>G	exon									-0.196114
NM_015665.6:c.250del	AAAS	Cas12a	Cas12a_90	12:53320550-53320575	+	CCATGCCTCACcAATGTTGAT	TTTG	AACCCTTTGCCATGCCTCACcAATGTTGATGCAT	-	-7	-	71.19	-	GT>G	exon
NM_015665.6:c.1A>G	AAAS	spCas9	spCas9_91	12:53321451-53321474	+	CCCCAGAGAGCACAcCTTGC	CGG	CAACCCCAGAGAGCACAcCTTGCCGGTTCG	47.86	-3	24.19	-	68.42	A>G	5utr									-0.16549
NM_015665.6:c.1A>G	AAAS	spCas9	spCas9_92	12:53321464-53321487	-	AGACGTCCTGCGAACCGGCA	AGg	TGCAGACGTCCTGCGAACCGGCAAGgTGTG	51.49	6	41.35	-	74.4	A>G	5utr									-0.00492738
NM_015665.6:c.1A>G	AAAS	saCas9	saCas9_94	12:53321449-53321476	-	GAACCGGCAAGgTGTGCTCTC	TGGGGT	TGCGAACCGGCAAGgTGTGCTCTCTGGGGTTGTT	-	-7	-	-	69.89	A>G	5utr
NM_015665.6:c.399+1G>A	AAAS	spCas9	spCas9_95	12:53315322-53315345	+	AAGCCAAACTTAtAGACAGA	TGG	AGGAAGCCAAACTTAtAGACAGATGGGGGA	50.79	-5	16.66	-	66.85	G>A	exon									-0.209931
NM_015665.6:c.399+1G>A	AAAS	spCas9	spCas9_98	12:53315324-53315347	-	CCCCCATCTGTCTaTAAGTT	TGG	GTTCCCCCATCTGTCTaTAAGTTTGGCTTC	26.37	-4	34.74	-	71.46	G>A	exon									-0.204716
NM_015665.6:c.370del	AAAS	spCas9	spCas9_99	12:53315340-53315363	+	GATGGGGGAACAGGGACCCA	TGG	ACAGATGGGGGAACAGGGACCCATGGaGGA	49.69	7	46.07	-	58.71	TC>T	exon									0.0282244
NM_015665.6:c.370del	AAAS	spCas9	spCas9_102	12:53315356-53315379	-	TCGATGGGCCTCTTCCtCCA	TGG	CTGTCGATGGGCCTCTTCCtCCATGGGTCC	41.15	-1	35.15	-	60.18	TC>T	exon									-0.111838
NM_015665.6:c.370del	AAAS	saCas9	saCas9_104	12:53315354-53315381	-	TGTCGATGGGCCTCTTCCtCC	ATGGGT	CTCTGTCGATGGGCCTCTTCCtCCATGGGTCCCT	-	1	-	-	62.23	TC>T	exon
NM_015665.6:c.1332-2A>T	AAAS	spCas9	spCas9_105	12:53307920-53307943	+	GATAATGCCACaAGAAGAAA	AGG	CTGGATAATGCCACaAGAAGAAAAGGTGAG	52.29	-6	46.95	-	71.91	A>T	intron									0.0465848
NM_015665.6:c.1332-2A>T	AAAS	spCas9	spCas9_106	12:53307926-53307949	-	CTGCTCACCTTTTCTTCTtG	TGG	TGCCTGCTCACCTTTTCTTCTtGTGGCATT	25.6	2	27.19	-	71.27	A>T	intron									-0.271287
NM_015665.6:c.972G>A	AAAS	spCas9	spCas9_107	12:53308961-53308984	+	TGACAGCGCCCTGATAGAGT	AGG	ACCTGACAGCGCCCTGATAGAGTAGGtCAC	50.56	7	62.2	-	64.64	G>A	exon									0.164253
NM_015665.6:c.1331+1G>A	AAAS	spCas9	spCas9_108	12:53308033-53308056	+	GGGCCCACATGGCACTTAtC	AGG	TAAGGGCCCACATGGCACTTAtCAGGGAAG	40.34	2	43.51	-	61	G>A	exon									-0.0479913
NM_015665.6:c.1331+1G>A	AAAS	Cas12a	Cas12a_111	12:53308043-53308068	-	AGCTCCTTCCCTGaTAAGTGC	TTTG	CTGTGTTTGAGCTCCTTCCCTGaTAAGTGCCATG	-	-5	-	68.12	-	G>A	exon
NM_015665.6:c.1157_1160del	AAAS	spCas9	spCas9_112	12:53308443-53308466	-	TGAGACAACAAgACACCAGA	TGG	GTCTGAGACAACAAgACACCAGATGGTGAG	59.44	-6	59.2	-	77.14	GACAT>G	exon									0.187458
NM_015665.6:c.446+1G>T	AAAS	saCas9	saCas9_113	12:53315087-53315114	-	ATTTGCCCAAGTCACAAATTG	tTGAGT	TGAATTTGCCCAAGTCACAAATTGtTGAGTGCAC	-	4	-	-	85.32	G>T	exon
NM_015665.6:c.446+1G>T	AAAS	Cas12a	Cas12a_114	12:53315088-53315113	-	CCCAAGTCACAAATTGtTGAG	TTTG	CTGAATTTGCCCAAGTCACAAATTGtTGAGTGCA	-	-2	-	65.56	-	G>T	exon
NM_015665.6:c.352dup	AAAS	spCas9	spCas9_115	12:53315373-53315396	-	GCCCTGGCACTCTGtgTCGA	TGG	TGGGCCCTGGCACTCTGtgTCGATGGGCCT	44.3	-2	23.98	-	75.34	G>GT	exon									-0.190058
NM_015665.6:c.352dup	AAAS	saCas9	saCas9_117	12:53315362-53315389	+	GAGGGAAGAGGCCCATCGAca	CAGAGT	ATGGAGGGAAGAGGCCCATCGAcaCAGAGTGCCA	-	2	-	-	72.82	G>GT	exon
NM_015665.6:c.1191dup	AAAS	spCas9	spCas9_118	12:53308335-53308358	-	CCCACAGGCTTGGGGGAGag	AGG	TTACCCACAGGCTTGGGGGAGagAGGCTCA	50.63	3	57.62	-	63.65	G>GA	exon									0.127263
NM_015665.5:c.310_317delTTTGAGTG	AAAS	spCas9	spCas9_119	12:53315403-53315426	+	ATGCCGTCTTCACcCACTGT	AGG	CGGATGCCGTCTTCACcCACTGTAGGGTTG	51.08	-4	60.23	-	55.74	GGTGAGTTT>G	exon									0.153778
NM_015665.5:c.310_317delTTTGAGTG	AAAS	spCas9	spCas9_121	12:53315415-53315438	-	CTGCTTCCTCAACCCTACAG	TGg	GAGCTGCTTCCTCAACCCTACAGTGgGTGA	63.29	6	53.24	-	69.71	GGTGAGTTT>G	exon									0.163084
NM_015665.5:c.310_317delTTTGAGTG	AAAS	saCas9	saCas9_124	12:53315401-53315428	+	GGATGCCGTCTTCACcCACTG	TAGGGT	GCCGGATGCCGTCTTCACcCACTGTAGGGTTGAG	-	-3	-	-	53.86	GGTGAGTTT>G	exon
NM_015665.5:c.310_317delTTTGAGTG	AAAS	saCas9	saCas9_125	12:53315413-53315440	-	AGCTGCTTCCTCAACCCTACA	GTGgGT	CAGAGCTGCTTCCTCAACCCTACAGTGgGTGAAG	-	7	-	-	70.31	GGTGAGTTT>G	exon
NM_015665.5:c.310_317delTTTGAGTG	AAAS	CasX	CasX_126	12:53315410-53315434	-	TCAACCCTACAGTGgGTGAA	TTCC	GCTGCTTCCTCAACCCTACAGTGgGTGAAGACG	-	-5	-	-	-	GGTGAGTTT>G	exon
NM_015665.6:c.57_58del	AAAS	spCas9	spCas9_127	12:53321391-53321414	+	CAGCTCGTTATTGTGCtTAT	AGG	CACCAGCTCGTTATTGTGCtTATAGGGTGA	29.39	-1	9.24	-	51.16	AGT>A	exon									-0.390839
NM_015665.6:c.57_58del	AAAS	saCas9	saCas9_129	12:53321389-53321416	+	ACCAGCTCGTTATTGTGCtTA	TAGGGT	GTCACCAGCTCGTTATTGTGCtTATAGGGTGACT	-	1	-	-	53.93	AGT>A	exon
NM_015665.6:c.1066_1067del	AAAS	spCas9	spCas9_130	12:53308724-53308747	+	CCACAACGTTCTGGAAAAGA	cGG	TCACCACAACGTTCTGGAAAAGAcGGAGTA	55.5	4	13.09	-	77.58	GTC>G	exon									-0.21516
NM_015665.6:c.1066_1067del	AAAS	saCas9	saCas9_131	12:53308723-53308750	+	ACCACAACGTTCTGGAAAAGA	cGGAGT	CTCACCACAACGTTCTGGAAAAGAcGGAGTAAAT	-	4	-	-	73.37	GTC>G	exon
NM_015665.6:c.1416+2T>C	AAAS	spCas9	spCas9_132	12:53307843-53307866	-	CAAAGGGGCCCTGCTCAGTG	TGG	CAACAAAGGGGCCCTGCTCAGTGTGGcGAG	51.75	7	71.37	-	71.43	T>C	intron									0.244593
NM_015665.6:c.1416+2T>C	AAAS	saCas9	saCas9_134	12:53307838-53307865	-	AAAGGGGCCCTGCTCAGTGTG	GcGAGT	AACAAAGGGGCCCTGCTCAGTGTGGcGAGTGCGC	-	5	-	-	69.42	T>C	intron
NM_015665.6:c.1416+2T>C	AAAS	CasX	CasX_135	12:53307847-53307871	-	ACAAAGGGGCCCTGCTCAGT	TTCA	CTTCCTTCAACAAAGGGGCCCTGCTCAGTGTGG	-	6	-	-	-	T>C	intron
NM_015665.6:c.1331+1G>C	AAAS	spCas9	spCas9_136	12:53308033-53308056	+	GGGCCCACATGGCACTTAgC	AGG	TAAGGGCCCACATGGCACTTAgCAGGGAAG	52.82	2	47.02	-	61.06	G>C	exon									0.0535541
NM_015665.6:c.1331+1G>C	AAAS	Cas12a	Cas12a_139	12:53308043-53308068	-	AGCTCCTTCCCTGcTAAGTGC	TTTG	CTGTGTTTGAGCTCCTTCCCTGcTAAGTGCCATG	-	-5	-	65.58	-	G>C	exon
NM_015665.5:c.936_937delAG	AAAS	spCas9	spCas9_140	12:53309013-53309036	-	TGCTTTTCTCTGGCTCAGtC	TGG	ATTTGCTTTTCTCTGGCTCAGtCTGGGAGG	38.22	2	40.25	-	65.59	TGA>T	exon									-0.088569
NM_015665.5:c.936_937delAG	AAAS	Cas12a	Cas12a_143	12:53309013-53309038	-	CTTTTCTCTGGCTCAGtCTGG	TTTG	TGTAATTTGCTTTTCTCTGGCTCAGtCTGGGAGG	-	-2	-	4.16	-	TGA>T	exon
NM_015665.6:c.816G>A	AAAS	spCas9	spCas9_144	12:53309264-53309287	+	TGTTGAGACATCtCATACCT	AGG	CTCTGTTGAGACATCtCATACCTAGGAGAG	52.07	-5	61.3	-	57.75	G>A	exon									0.167737
NM_015665.6:c.816G>A	AAAS	saCas9	saCas9_145	12:53309265-53309292	+	GTTGAGACATCtCATACCTAG	GAGAGT	TCTGTTGAGACATCtCATACCTAGGAGAGTGGGG	-	-7	-	-	59.88	G>A	exon
NM_015665.6:c.254del	AAAS	spCas9	spCas9_146	12:53315768-53315791	+	AGGCCCACATCaGCCTGATA	AGG	AAAAGGCCCACATCaGCCTGATAAGGGAGG	48.14	-6	41.35	-	56.93	TG>T	exon									-0.0191102
NM_015665.6:c.254del	AAAS	spCas9	spCas9_148	12:53315771-53315794	-	CCTCCCTTATCAGGCtGATG	TGG	TTTCCTCCCTTATCAGGCtGATGTGGGCCT	40.01	-2	37.23	-	55.37	TG>T	exon									-0.0998891
NM_015665.6:c.254del	AAAS	CasX	CasX_150	12:53315772-53315796	-	TCCCTTATCAGGCtGATGTG	TTCC	ACATTTTCCTCCCTTATCAGGCtGATGTGGGCC	-	-6	-	-	-	TG>T	exon
NM_015665.6:c.254del	AAAS	Cas12a	Cas12a_151	12:53315753-53315778	+	GCACCCCAAAAAGGCCCACAT	TTTA	TTTCATTTAGCACCCCAAAAAGGCCCACATCaGC	-	5	-	72.16	-	TG>T	exon
NM_015665.6:c.254del	AAAS	Cas12a	Cas12a_152	12:53315772-53315797	-	CTCCCTTATCAGGCtGATGTG	TTTC	CACATTTTCCTCCCTTATCAGGCtGATGTGGGCC	-	-4	-	34.74	-	TG>T	exon
NM_015665.6:c.1366del	AAAS	spCas9	spCas9_153	12:53307874-53307897	+	AAGGATGGAAAGTGATGAGC	tGG	AGGAAGGATGGAAAGTGATGAGCtGGGCTG	77.39	4	67.65	-	62.61	AC>A	exon									0.365965
NM_015665.6:c.400-2A>G	AAAS	spCas9	spCas9_157	12:53315140-53315163	-	CTGTGTCTATCTTGTTCTTA	CgG	GTCCTGTGTCTATCTTGTTCTTACgGCTCA	32.36	5	16.86	-	79.92	A>G	intron									-0.319588
NM_015665.6:c.400-2A>G	AAAS	CasX	CasX_159	12:53315114-53315138	+	GCGATCAGATCTTCGCTCCT	TTCA	GCAAATTCAGCGATCAGATCTTCGCTCCTGAGC	-	6	-	-	-	A>G	intron
NM_015665.6:c.810+1G>A	AAAS	spCas9	spCas9_160	12:53309582-53309605	+	GGGGCAGGGACCCACTCAtC	CGG	TGAGGGGCAGGGACCCACTCAtCCGGATAG	53.5	2	47.15	-	65.34	G>A	exon									0.0572794
NM_015665.6:c.810+1G>A	AAAS	spCas9	spCas9_161	12:53309600-53309623	-	CACCCGTGGATGCTGCTATC	CGG	CTTCACCCGTGGATGCTGCTATCCGGaTGA	40.8	7	17.7	-	72.59	G>A	exon									-0.261293
NM_015665.6:c.810+1G>A	AAAS	saCas9	saCas9_164	12:53309580-53309607	+	GAGGGGCAGGGACCCACTCAt	CCGGAT	CATGAGGGGCAGGGACCCACTCAtCCGGATAGCA	-	3	-	-	67.17	G>A	exon
NM_015665.6:c.810+1G>A	AAAS	saCas9	saCas9_165	12:53309594-53309621	-	CCCGTGGATGCTGCTATCCGG	aTGAGT	TCACCCGTGGATGCTGCTATCCGGaTGAGTGGGT	-	4	-	-	67.14	G>A	exon
NM_015665.6:c.810+1G>A	AAAS	CasX	CasX_167	12:53309601-53309625	-	CCCGTGGATGCTGCTATCCG	TTCA	TCAGCTTCACCCGTGGATGCTGCTATCCGGaTG	-	3	-	-	-	G>A	exon
NM_015665.6:c.251G>A	AAAS	spCas9	spCas9_168	12:53320558-53320581	-	AGATGCATCAACATTTaGTG	AGG	AAGAGATGCATCAACATTTaGTGAGGCATG	62.13	-1	64.72	-	54.67	G>A	exon									0.255407
NM_015665.6:c.251G>A	AAAS	Cas12a	Cas12a_170	12:53320550-53320575	+	CCATGCCTCACtAAATGTTGA	TTTG	AACCCTTTGCCATGCCTCACtAAATGTTGATGCA	-	-7	-	64.66	-	G>A	exon
NM_015665.6:c.787T>C	AAAS	spCas9	spCas9_171	12:53309602-53309625	+	CGGATAGCAGCATCCACGGG	TGg	ACCCGGATAGCAGCATCCACGGGTGgAGCT	56.77	6	53.92	-	66.68	T>C	exon									0.131638
NM_015665.6:c.787T>C	AAAS	spCas9	spCas9_172	12:53309614-53309637	-	GCTGCTCTCAGCTcCACCCG	TGG	GCGGCTGCTCTCAGCTcCACCCGTGGATGC	52.04	-4	54.13	-	74.44	T>C	exon									0.103458
NM_015665.6:c.787T>C	AAAS	saCas9	saCas9_173	12:53309612-53309639	-	CGGCTGCTCTCAGCTcCACCC	GTGGAT	GGGCGGCTGCTCTCAGCTcCACCCGTGGATGCTG	-	-3	-	-	77.25	T>C	exon
NM_015665.6:c.409G>T	AAAS	CasX	CasX_174	12:53315114-53315138	+	GCGATCAGATCTTaGCTCCT	TTCA	GCAAATTCAGCGATCAGATCTTaGCTCCTGAGC	-	-6	-	-	-	G>T	exon
NM_015665.6:c.409G>T	AAAS	CasX	CasX_175	12:53315125-53315149	-	TACAGCTCAGGAGCtAAGAT	TTCT	TCTTGTTCTTACAGCTCAGGAGCtAAGATCTGA	-	-5	-	-	-	G>T	exon
NM_015665.6:c.43C>A	AAAS	spCas9	spCas9_176	12:53321410-53321433	+	TATAGGGTGACTTtACCCCG	AGG	TCATATAGGGTGACTTtACCCCGAGGCGGT	63.49	-4	65.13	-	84.8	C>A	exon									0.257518
NM_015665.6:c.43C>A	AAAS	CasX	CasX_178	12:53321423-53321447	-	CTCCTCCACCGCCTCGGGGT	TTCC	GGTTGTTCCCTCCTCCACCGCCTCGGGGTaAAG	-	2	-	-	-	C>A	exon
NM_015665.6:c.688C>T	AAAS	spCas9	spCas9_179	12:53314279-53314302	+	GCAGGCTACTAGGACTTACC	aGG	AAGGCAGGCTACTAGGACTTACCaGGTAGA	63.26	4	70.54	-	55.05	C>T	exon									0.309777
NM_015665.6:c.688C>T	AAAS	spCas9	spCas9_181	12:53314296-53314319	-	ACCCTACCTCCTTGTCTACC	tGG	TGGACCCTACCTCCTTGTCTACCtGGTAAG	47.15	4	44.14	-	59.46	C>T	exon									-0.00268105
NM_015665.6:c.1288C>T	AAAS	spCas9	spCas9_182	12:53308077-53308100	+	TGTTTCGAGTGCGAAAAAaG	AGG	GGCTGTTTCGAGTGCGAAAAAaGAGGATGA	51.09	2	50.57	-	61.1	C>T	exon									0.0726888
NM_015665.6:c.1288C>T	AAAS	saCas9	saCas9_184	12:53308075-53308102	+	GCTGTTTCGAGTGCGAAAAAa	GAGGAT	AGGGCTGTTTCGAGTGCGAAAAAaGAGGATGACT	-	3	-	-	57.05	C>T	exon
NM_015665.6:c.1288C>T	AAAS	Cas12a	Cas12a_185	12:53308079-53308104	+	GAGTGCGAAAAAaGAGGATGA	TTTC	GGCTGTTTCGAGTGCGAAAAAaGAGGATGACTGG	-	-6	-	65.87	-	C>T	exon
NM_015665.6:c.464G>A	AAAS	CasX	CasX_186	12:53314833-53314857	-	TTAGGTCCAGCTGCTGCTTG	TTCC	ACCCCTTCCTTAGGTCCAGCTGCTGCTTGCaTG	-	3	-	-	-	G>A	intron
NM_015665.6:c.934C>T	AAAS	spCas9	spCas9_187	12:53309155-53309178	-	CCACTCCTTCAGCTGTCTTT	tGG	CTACCACTCCTTCAGCTGTCTTTtGGTGAG	11.84	4	3.74	-	69.65	C>T	exon									-0.543941
NM_015665.6:c.934C>T	AAAS	saCas9	saCas9_190	12:53309150-53309177	-	CACTCCTTCAGCTGTCTTTtG	GTGAGT	TACCACTCCTTCAGCTGTCTTTtGGTGAGTGGGA	-	2	-	-	69.79	C>T	exon
NM_015665.6:c.1432C>T	AAAS	spCas9	spCas9_191	12:53307684-53307707	+	GATGTGGGCAATTCaGCCTG	TGG	CGGGATGTGGGCAATTCaGCCTGTGGACCA	56.43	-3	51.57	-	77.07	C>T	exon									0.107148
NM_015665.6:c.1432C>T	AAAS	saCas9	saCas9_192	12:53307693-53307720	-	TCTGCAGGGCTGGTCCACAGG	CtGAAT	TTCTCTGCAGGGCTGGTCCACAGGCtGAATTGCC	-	5	-	-	75.19	C>T	exon
NM_015665.6:c.1432C>T	AAAS	CasX	CasX_193	12:53307699-53307723	-	CTGCAGGGCTGGTCCACAGG	TTCT	TTCCCTTCTCTGCAGGGCTGGTCCACAGGCtGA	-	3	-	-	-	C>T	exon
NM_015665.6:c.855_856delinsTT	AAAS	spCas9	spCas9_194	12:53309222-53309245	+	CACCCCACCTCCTCaaAACC	AGG	GGTCACCCCACCTCCTCaaAACCAGGGAAG	70.6	-3	79.85	-	64.61	CC>TT	exon									0.426238
NM_015665.6:c.855_856delinsTT	AAAS	spCas9	spCas9_196	12:53309231-53309254	-	GTCCCCCTTCCCTGGTTttG	AGG	TGTGTCCCCCTTCCCTGGTTttGAGGAGGT	32.99	2	21.23	-	66.45	CC>TT	exon									-0.275844
NM_015665.6:c.855_856delinsTT	AAAS	saCas9	saCas9_201	12:53309222-53309249	-	CCTTCCCTGGTTttGAGGAGG	TGGGGT	CCCCCTTCCCTGGTTttGAGGAGGTGGGGTGACC	-	-5	-	-	66.15	CC>TT	exon
NM_015665.6:c.70G>T	AAAS	spCas9	spCas9_202	12:53321389-53321412	-	ATATGAGCACAATAACtAGC	TGG	CCTATATGAGCACAATAACtAGCTGGTGAC	50.66	-1	39.67	-	63.78	G>T	exon									-0.0203522
NM_015665.6:c.980dup	AAAS	spCas9	spCas9_204	12:53308963-53308986	+	ACAGCGCCCTGAtaTAGAGT	AGG	CTGACAGCGCCCTGAtaTAGAGTAGGCCAC	53.7	-5	63.7	-	66.23	A>AT	exon									0.1944
NM_015665.6:c.980dup	AAAS	spCas9	spCas9_205	12:53308969-53308992	-	GAGGTGGCCTACTCTAtaTC	AGG	TGAGAGGTGGCCTACTCTAtaTCAGGGCGC	54.42	1	66.87	-	64.04	A>AT	exon									0.225353
NM_015665.6:c.980dup	AAAS	saCas9	saCas9_207	12:53308956-53308983	+	TTACCTGACAGCGCCCTGAta	TAGAGT	CTCTTACCTGACAGCGCCCTGAtaTAGAGTAGGC	-	2	-	-	67.62	A>AT	exon
NM_020297.4:c.1266T>G	ABCC9	spCas9	spCas9_208	12:21910198-21910221	-	TTGAAACTAAgCAACTCATG	TGG	CCATTGAAACTAAgCAACTCATGTGGTTTT	58.59	-7	54.45	-	72.57	T>G	exon									0.144803
NM_020297.4:c.3347G>A	ABCC9	saCas9	saCas9_209	12:21842418-21842445	+	AGACAGGCAGAGCAGTGTTGA	GtGAGT	GGCAGACAGGCAGAGCAGTGTTGAGtGAGTTAGA	-	5	-	-	71.07	G>A	exon
NM_020297.4:c.1433C>T	ABCC9	spCas9	spCas9_210	12:21908099-21908122	-	GTACTTTATTGCTACAAAGT	TGG	TCAGTACTTTATTGCTACAAAGTTGGtAGA	27.15	7	27.39	-	66.68	C>T	exon									-0.259216
NM_020297.4:c.1433C>T	ABCC9	CasX	CasX_212	12:21908102-21908126	-	GTACTTTATTGCTACAAAGT	TTCA	GCCAATTCAGTACTTTATTGCTACAAAGTTGGt	-	5	-	-	-	C>T	exon
NM_020297.4:c.1433C>T	ABCC9	Cas12a	Cas12a_213	12:21908093-21908118	-	TTGCTACAAAGTTGGtAGAGG	TTTA	AGTACTTTATTGCTACAAAGTTGGtAGAGGCTCA	-	-3	-	12.9	-	C>T	exon
NM_020297.4:c.3128G>A	ABCC9	spCas9	spCas9_214	12:21844880-21844903	-	GCTGGCTTTAGCATACTCTa	TGG	GTGGCTGGCTTTAGCATACTCTaTGGAGCA	38.65	3	25.96	-	65.55	G>A	exon									-0.203677
NM_020297.4:c.3128G>A	ABCC9	saCas9	saCas9_216	12:21844863-21844890	+	CAAAGGAAAATGCCTGCTCCA	tAGAGT	AGGCAAAGGAAAATGCCTGCTCCAtAGAGTATGC	-	4	-	-	56.9	G>A	exon
NM_020297.4:c.3461G>A	ABCC9	spCas9	spCas9_217	12:21842323-21842346	-	TTTTATCCAGAAATACTTTC	aGG	TTATTTTATCCAGAAATACTTTCaGGTTGC	37.69	4	10.33	-	60.9	G>A	exon									-0.336504
NM_020297.4:c.3461G>A	ABCC9	Cas12a	Cas12a_218	12:21842305-21842330	+	CTTACTTAGAGGCAACCtGAA	TTTA	GCTGTTTTACTTACTTAGAGGCAACCtGAAAGTA	-	-1	-	25.51	-	G>A	exon
NM_020297.4:c.3461G>A	ABCC9	Cas12a	Cas12a_219	12:21842325-21842350	-	TTTTATCCAGAAATACTTTCa	TTTA	TGCCTTTTATTTTATCCAGAAATACTTTCaGGTT	-	3	-	1.45	-	G>A	exon
NM_020297.4:c.3460C>T	ABCC9	spCas9	spCas9_221	12:21842324-21842347	-	ATTTTATCCAGAAATACTTT	tGG	TTTATTTTATCCAGAAATACTTTtGGGTTG	25.18	4	1.27	-	67.53	C>T	exon									-0.485946
NM_020297.4:c.3460C>T	ABCC9	saCas9	saCas9_223	12:21842316-21842343	+	AGAGGCAACCCaAAAGTATTT	CTGGAT	CTTAGAGGCAACCCaAAAGTATTTCTGGATAAAA	-	-7	-	-	61.62	C>T	exon
NM_020297.4:c.3460C>T	ABCC9	saCas9	saCas9_224	12:21842322-21842349	-	TTATTTTATCCAGAAATACTT	TtGGGT	CTTTTATTTTATCCAGAAATACTTTtGGGTTGCC	-	5	-	-	67.48	C>T	exon
NM_020297.4:c.3460C>T	ABCC9	Cas12a	Cas12a_225	12:21842305-21842330	+	CTTACTTAGAGGCAACCCaAA	TTTA	GCTGTTTTACTTACTTAGAGGCAACCCaAAAGTA	-	1	-	27.3	-	C>T	exon
NM_020297.4:c.3460C>T	ABCC9	Cas12a	Cas12a_226	12:21842325-21842350	-	TTTTATCCAGAAATACTTTtG	TTTA	TGCCTTTTATTTTATCCAGAAATACTTTtGGGTT	-	2	-	1.52	-	C>T	exon
NM_020297.4:c.178C>T	ABCC9	spCas9	spCas9_228	12:21933876-21933899	-	TACAAATTCACtACAACACA	TGG	AAGTACAAATTCACtACAACACATGGCTTC	71.21	-6	58.97	-	75.4	C>T	5utr									0.254633
NM_020297.4:c.178C>T	ABCC9	saCas9	saCas9_229	12:21933868-21933895	+	AAAATGAAGCCATGTGTTGTa	GTGAAT	CGGAAAATGAAGCCATGTGTTGTaGTGAATTTGT	-	3	-	-	70.58	C>T	5utr
NM_020297.4:c.3058T>C	ABCC9	spCas9	spCas9_230	12:21845619-21845642	+	GTATTGTTTATACTGTACTC	CGg	CCAGTATTGTTTATACTGTACTCCGgTGTC	45.79	6	19.33	-	72.35	T>C	exon									-0.218746
NM_020297.4:c.3058T>C	ABCC9	spCas9	spCas9_232	12:21845637-21845660	-	TTGGCTGGCCACATGGACAc	CGG	CTATTGGCTGGCCACATGGACAcCGGAGTA	53.09	3	53.88	-	71.8	T>C	exon									0.108319
NM_020297.4:c.3058T>C	ABCC9	saCas9	saCas9_233	12:21845634-21845661	-	ATTGGCTGGCCACATGGACAc	CGGAGT	ACTATTGGCTGGCCACATGGACAcCGGAGTACAG	-	3	-	-	68.84	T>C	exon
NM_020297.4:c.3058T>C	ABCC9	CasX	CasX_234	12:21845614-21845638	+	AGTATTGTTTATACTGTACT	TTCC	AGCTTTTCCAGTATTGTTTATACTGTACTCCGg	-	5	-	-	-	T>C	exon
NM_020297.4:c.3058T>C	ABCC9	Cas12a	Cas12a_235	12:21845613-21845638	+	CAGTATTGTTTATACTGTACT	TTTC	CAGCTTTTCCAGTATTGTTTATACTGTACTCCGg	-	7	-	28.81	-	T>C	exon
NM_020297.4:c.4537G>A	ABCC9	spCas9	spCas9_237	12:21801147-21801170	-	CACTATTCTGACGaCAGACC	TGG	ACACACTATTCTGACGaCAGACCTGGTTAT	67.81	-4	65.96	-	57.77	G>A	exon									0.297744
NM_020297.4:c.4537G>A	ABCC9	saCas9	saCas9_238	12:21801140-21801167	+	CACAATAACCAGGTCTGtCGT	CAGAAT	CATCACAATAACCAGGTCTGtCGTCAGAATAGTG	-	-1	-	-	53.74	G>A	exon
NM_020297.4:c.4537G>A	ABCC9	CasX	CasX_239	12:21801135-21801159	+	TCACAATAACCAGGTCTGtC	TTCA	CTCGCTTCATCACAATAACCAGGTCTGtCGTCA	-	-1	-	-	-	G>A	exon
NM_020297.4:c.2444G>C	ABCC9	spCas9	spCas9_240	12:21859636-21859659	+	TCTGCCTCTGTgCCCCACTC	AGG	TTCTCTGCCTCTGTgCCCCACTCAGGTTGA	43.89	-6	41.44	-	67.31	G>C	exon									-0.0462811
NM_020297.4:c.2444G>C	ABCC9	spCas9	spCas9_241	12:21859647-21859670	-	CTAGGGCATCAACCTGAGTG	GGG	TCTCTAGGGCATCAACCTGAGTGGGGcACA	62.55	7	67.42	-	66.16	G>C	exon									0.276575
NM_020297.4:c.2444G>C	ABCC9	saCas9	saCas9_243	12:21859631-21859658	-	CCTGAGTGGGGcACAGAGGCA	GAGAAT	CAACCTGAGTGGGGcACAGAGGCAGAGAATCTGT	-	-7	-	-	69.83	G>C	exon
NM_020297.4:c.2444G>C	ABCC9	CasX	CasX_244	12:21859650-21859674	-	CTAGGGCATCAACCTGAGTG	TTCT	GTCTCTTCTCTAGGGCATCAACCTGAGTGGGGc	-	5	-	-	-	G>C	exon
NM_020297.4:c.3346C>G	ABCC9	spCas9	spCas9_245	12:21842439-21842462	-	CCAACCTTGGAATCTCTAAC	TgG	CCTCCAACCTTGGAATCTCTAACTgGCTCA	49.8	5	53.89	-	69.61	C>G	exon									0.089911
NM_020297.4:c.3460C>G	ABCC9	spCas9	spCas9_246	12:21842325-21842348	-	TATTTTATCCAGAAATACTT	TgG	TTTTATTTTATCCAGAAATACTTTgGGGTT	31.34	5	3.98	-	62.89	C>G	exon									-0.426355
NM_020297.4:c.3460C>G	ABCC9	saCas9	saCas9_249	12:21842316-21842343	+	AGAGGCAACCCcAAAGTATTT	CTGGAT	CTTAGAGGCAACCCcAAAGTATTTCTGGATAAAA	-	-7	-	-	59.7	C>G	exon
NM_020297.4:c.3460C>G	ABCC9	saCas9	saCas9_250	12:21842322-21842349	-	TTATTTTATCCAGAAATACTT	TgGGGT	CTTTTATTTTATCCAGAAATACTTTgGGGTTGCC	-	5	-	-	62.29	C>G	exon
NM_020297.4:c.3460C>G	ABCC9	Cas12a	Cas12a_251	12:21842305-21842330	+	CTTACTTAGAGGCAACCCcAA	TTTA	GCTGTTTTACTTACTTAGAGGCAACCCcAAAGTA	-	1	-	24.83	-	C>G	exon
NM_020297.4:c.3460C>G	ABCC9	Cas12a	Cas12a_252	12:21842325-21842350	-	TTTTATCCAGAAATACTTTgG	TTTA	TGCCTTTTATTTTATCCAGAAATACTTTgGGGTT	-	2	-	1.83	-	C>G	exon
NM_020297.4:c.3605C>T	ABCC9	spCas9	spCas9_254	12:21829019-21829042	-	ACAACGTATGCTGGAACTGA	tGG	TAAACAACGTATGCTGGAACTGAtGGATAC	57.56	4	34.86	-	56.58	C>T	exon									-0.0175707
NM_020297.4:c.3605C>T	ABCC9	saCas9	saCas9_255	12:21829017-21829044	-	AAACAACGTATGCTGGAACTG	AtGGAT	TTTAAACAACGTATGCTGGAACTGAtGGATACAA	-	5	-	-	66.3	C>T	exon
NM_020297.4:c.3605C>T	ABCC9	Cas12a	Cas12a_256	12:21829022-21829047	-	AACAACGTATGCTGGAACTGA	TTTA	CCAGATTTAAACAACGTATGCTGGAACTGAtGGA	-	4	-	49.67	-	C>T	exon
NM_020297.4:c.2954A>C	ABCC9	spCas9	spCas9_257	12:21845722-21845745	+	GGAAGAATCCTCCAGATGTC	AGG	GCAGGAAGAATCCTCCAGATGTCAGGgAGC	56.55	7	55.12	-	70.03	A>C	exon									0.139213
NM_020297.4:c.2954A>C	ABCC9	spCas9	spCas9_260	12:21845732-21845755	-	TGCTGGCGCTcCCTGACATC	TGG	ACCTGCTGGCGCTcCCTGACATCTGGAGGA	37.56	-7	26.69	-	74.98	A>C	exon									-0.206889
NM_020297.4:c.3796G>A	ABCC9	spCas9	spCas9_261	12:21817277-21817300	-	ATTATTTGAATTGGGTTaTG	AGG	CCAATTATTTGAATTGGGTTaTGAGGAACT	42.02	1	29.95	-	56.47	G>A	exon									-0.148443
NM_000017.4:c.1112G>T	ACADS	spCas9	spCas9_263	12:120739298-120739321	+	CATCCAGATCCTGGGCGGCA	TGG	GGCCATCCAGATCCTGGGCGGCATGGtCTA	43.81	7	45.99	-	56.9	G>T	exon									-0.00612216
NM_000017.4:c.988C>T	ACADS	spCas9	spCas9_264	12:120738851-120738874	+	AGAGTGCCCGGCTGCTGACC	TGG	TGGAGAGTGCCCGGCTGCTGACCTGGtGCG	36.68	7	59.04	-	61.35	C>T	exon									0.0584204
NM_000017.4:c.988C>T	ACADS	spCas9	spCas9_265	12:120738868-120738891	-	CTTCAGCATGGCAGCGCaCC	AGG	ATCCTTCAGCATGGCAGCGCaCCAGGTCAG	63	1	71.03	-	73.69	C>T	exon									0.306615
NM_000017.4:c.988C>T	ACADS	CasX	CasX_266	12:120738878-120738902	-	TGTTATCCTTCAGCATGGCA	TTCT	AAGGCTTCTTGTTATCCTTCAGCATGGCAGCGC	-	6	-	-	-	C>T	exon
NM_000017.4:c.988_990delinsTGT	ACADS	spCas9	spCas9_268	12:120738851-120738874	+	AGAGTGCCCGGCTGCTGACC	TGG	TGGAGAGTGCCCGGCTGCTGACCTGGtgtG	36.03	7	61.17	-	59.1	CGC>TGT	exon									0.0728537
NM_000017.4:c.988_990delinsTGT	ACADS	spCas9	spCas9_269	12:120738868-120738891	-	CTTCAGCATGGCAGCacaCC	AGG	ATCCTTCAGCATGGCAGCacaCCAGGTCAG	64.37	1	74.47	-	73.81	CGC>TGT	exon									0.342872
NM_000017.4:c.988_990delinsTGT	ACADS	CasX	CasX_270	12:120738878-120738902	-	TGTTATCCTTCAGCATGGCA	TTCT	AAGGCTTCTTGTTATCCTTCAGCATGGCAGCac	-	6	-	-	-	CGC>TGT	exon
NM_000017.4:c.88C>T	ACADS	spCas9	spCas9_272	12:120727054-120727077	+	ACACACCATCTACtAGTCTG	TGG	GTTACACACCATCTACtAGTCTGTGGAACT	59.35	-4	50.9	-	66.94	C>T	exon									0.121724
NM_000017.4:c.88C>T	ACADS	spCas9	spCas9_273	12:120727058-120727081	-	CAGTTCCACAGACTaGTAGA	TGG	GGGCAGTTCCACAGACTaGTAGATGGTGTG	50.11	-3	55.89	-	65.7	C>T	exon									0.10937
NM_000017.4:c.1095G>T	ACADS	spCas9	spCas9_274	12:120739289-120739312	+	ATCTCAGGCCATCCAtATCC	TGG	CTCATCTCAGGCCATCCAtATCCTGGGCGG	52.88	-2	66.79	-	79.54	G>T	exon									0.211002
NM_000017.4:c.1095G>T	ACADS	spCas9	spCas9_277	12:120739300-120739323	-	AGCCCATGCCGCCCAGGATa	TGG	CGTAGCCCATGCCGCCCAGGATaTGGATGG	37.91	3	35.55	-	56.88	G>T	exon									-0.126406
NM_000017.4:c.1095G>T	ACADS	saCas9	saCas9_279	12:120739298-120739325	-	GTAGCCCATGCCGCCCAGGAT	aTGGAT	CACGTAGCCCATGCCGCCCAGGATaTGGATGGCC	-	4	-	-	56.81	G>T	exon
NM_000017.4:c.1095G>T	ACADS	CasX	CasX_280	12:120739284-120739308	+	CATCTCAGGCCATCCAtATC	TTCT	CACTGTTCTCATCTCAGGCCATCCAtATCCTGG	-	-3	-	-	-	G>T	exon
NM_000017.4:c.221_222insCCAT	ACADS	spCas9	spCas9_281	12:120736981-120737004	+	CCCAGGTGAAGAAgatccGA	TGG	GTGCCCAGGTGAAGAAgatccGATGGGCGG	63.71	-4	56.16	-	55.13	G>GATCC	exon									0.194008
NM_000017.4:c.221_222insCCAT	ACADS	spCas9	spCas9_283	12:120736981-120737004	-	CCCATCggatcTTCTTCACC	TGG	CCGCCCATCggatcTTCTTCACCTGGGCAC	56.64	-7	63.04	-	66.84	G>GATCC	exon									0.205901
NM_000017.4:c.221_222insCCAT	ACADS	CasX	CasX_284	12:120736972-120736996	+	CTGTGCCCAGGTGAAGAAga	TTCC	CGTCCTTCCCTGTGCCCAGGTGAAGAAgatccG	-	-1	-	-	-	G>GATCC	exon
NM_000017.4:c.238del	ACADS	spCas9	spCas9_285	12:120736993-120737016	+	AGATGGGCGGGCTTGGGCTt	TGG	AGAAGATGGGCGGGCTTGGGCTtTGGCCAT	23.33	3	28.97	-	78.21	TC>T	exon									-0.271969
NM_000017.4:c.319_321delinsTGC	ACADS	spCas9	spCas9_287	12:120737076-120737099	+	GCCATGGAGGAGATCAGCtg	cGG	ATCGCCATGGAGGAGATCAGCtgcGGCTGC	58.21	2	62.39	-	57.6	CGT>TGC	exon									0.212509
NM_000017.4:c.1084C>T	ACADS	spCas9	spCas9_288	12:120739175-120739198	+	CGCGACCGCCATCAGCCACt	AGG	GGCCGCGACCGCCATCAGCCACtAGGTGAG	52.63	3	44.59	-	82.39	C>T	exon									0.0259449
NM_000017.4:c.1084C>T	ACADS	spCas9	spCas9_289	12:120739189-120739212	-	CACTGTGGACACTCACCTaG	TGG	GCTCACTGTGGACACTCACCTaGTGGCTGA	59.3	2	59.93	-	63.55	C>T	exon									0.196794
NM_000017.4:c.1084C>T	ACADS	saCas9	saCas9_291	12:120739176-120739203	+	GCGACCGCCATCAGCCACtAG	GTGAGT	GCCGCGACCGCCATCAGCCACtAGGTGAGTGTCC	-	1	-	-	76.76	C>T	exon
NM_000017.4:c.973C>T	ACADS	spCas9	spCas9_292	12:120738839-120738862	+	CCCTGGCCCTGGAGAGTGCC	tGG	TGGCCCTGGCCCTGGAGAGTGCCtGGCTGC	45.54	4	57.27	-	53.19	C>T	exon									0.0979307
NM_000017.4:c.973C>T	ACADS	spCas9	spCas9_293	12:120738856-120738879	-	AGCGCGCCAGGTCAGCAGCC	aGG	GGCAGCGCGCCAGGTCAGCAGCCaGGCACT	55.91	4	52.27	-	64.82	C>T	exon									0.113615
NM_000017.4:c.1058C>T	ACADS	spCas9	spCas9_294	12:120739148-120739171	+	CATGGCCAAGCTGGCCGCCT	tGG	AGCCATGGCCAAGCTGGCCGCCTtGGAGGC	25.71	4	36.41	-	21.7	C>T	exon									-0.179647
NM_000017.4:c.1058C>T	ACADS	spCas9	spCas9_296	12:120739164-120739187	-	GATGGCGGTCGCGGCCTCCa	AGG	GCTGATGGCGGTCGCGGCCTCCaAGGCGGC	43.92	3	38.58	-	46.94	C>T	exon									-0.0634394
NM_000017.4:c.1138C>T	ACADS	spCas9	spCas9_298	12:120739327-120739350	+	TGACAGAGATGCCGGCAGAG	tGG	ACGTGACAGAGATGCCGGCAGAGtGGCACT	47.2	4	56.25	-	69.52	C>T	exon									0.0942241
NM_000017.4:c.1138C>T	ACADS	spCas9	spCas9_299	12:120739337-120739360	-	TCGCGGTAGTGCCaCTCTGC	CGG	GCGTCGCGGTAGTGCCaCTCTGCCGGCATC	40.85	-4	42.66	-	73.66	C>T	exon									-0.0558766
NM_000017.4:c.125_135del	ACADS	spCas9	spCas9_300	12:120727084-120727107	+	CGAGACACACCAGATGtTGC	CGG	GCCCGAGACACACCAGATGtTGCCGGGACT	55.15	-1	49.13	-	58.81	TTGCTCCAGACA>T	exon									0.0851755
NM_000017.4:c.125_135del	ACADS	spCas9	spCas9_302	12:120727092-120727115	-	GGCAAAGTCCCGGCAaCATC	TGG	CTCGGCAAAGTCCCGGCAaCATCTGGTGTG	41.87	-2	45.66	-	84.7	TTGCTCCAGACA>T	exon									-0.0286081
NM_000017.4:c.125_135del	ACADS	CasX	CasX_303	12:120727096-120727120	-	CGGCAAAGTCCCGGCAaCAT	TTCT	ACTCCTTCTCGGCAAAGTCCCGGCAaCATCTGG	-	-3	-	-	-	TTGCTCCAGACA>T	exon
NM_000017.4:c.795+1G>A	ACADS	spCas9	spCas9_304	12:120738438-120738461	+	CAAGATAGCCATGaTGAGCC	CGG	CTTCAAGATAGCCATGaTGAGCCCGGCAGT	55.44	-4	62.83	-	56.86	G>A	intron									0.200226
NM_000017.4:c.795+1G>A	ACADS	spCas9	spCas9_305	12:120738445-120738468	-	CCCCACTGCCGGGCTCAtCA	TGG	CACCCCCACTGCCGGGCTCAtCATGGCTAT	44.05	1	62.86	-	63.63	G>A	intron									0.132085
NM_000017.4:c.307GAG[1]	ACADS	spCas9	spCas9_306	12:120737060-120737083	+	CCTGGCCTACGCCATCGCCA	tGG	TTACCTGGCCTACGCCATCGCCAtGGAGAT	43.38	4	41.3	-	50.57	TGGA>T	exon									-0.0453013
NM_000017.4:c.307GAG[1]	ACADS	spCas9	spCas9_307	12:120737076-120737099	-	GCAGCCACGGCTGATCTCCa	TGG	GGCGCAGCCACGGCTGATCTCCaTGGCGAT	39.76	3	47.85	-	58.57	TGGA>T	exon									-0.0149046
NM_000017.4:c.812del	ACADS	spCas9	spCas9_309	12:120738526-120738549	+	CCCACAGCAAACCCTGGACA	tGG	GTCCCCACAGCAAACCCTGGACAtGGCCGC	63.98	4	70.05	-	80.35	TG>T	exon									0.302226
NM_000017.4:c.812del	ACADS	spCas9	spCas9_311	12:120738537-120738560	-	ATGCCGATGCGGCCaTGTCC	AGG	GCGATGCCGATGCGGCCaTGTCCAGGGTTT	50.88	-3	63.94	-	60.58	TG>T	exon									0.181676
NM_000017.4:c.812del	ACADS	saCas9	saCas9_313	12:120738535-120738562	-	CGATGCCGATGCGGCCaTGTC	CAGGGT	AGGCGATGCCGATGCGGCCaTGTCCAGGGTTTGC	-	-2	-	-	62.39	TG>T	exon
NM_000017.4:c.1031A>G	ACADS	spCas9	spCas9_314	12:120739118-120739141	+	CTGACTGTACCCCCATGTTT	AGG	GCTCTGACTGTACCCCCATGTTTAGGgGGC	26.83	7	24.88	-	69.79	A>G	exon									-0.282688
NM_000017.4:c.1031A>G	ACADS	spCas9	spCas9_319	12:120739129-120739152	-	CCATGGCTGCCcCCTAAACA	TGG	TGGCCATGGCTGCCcCCTAAACATGGGGGT	45.65	-6	66.29	-	74.07	A>G	exon									0.166453
NM_000017.4:c.1031A>G	ACADS	saCas9	saCas9_321	12:120739125-120739152	-	CCATGGCTGCCcCCTAAACAT	GGGGGT	TGGCCATGGCTGCCcCCTAAACATGGGGGTACAG	-	-7	-	-	71.68	A>G	exon
NM_000017.4:c.164C>T	ACADS	CasX	CasX_322	12:120727144-120727168	-	TTATCCACCTGGGCTGCAAT	TTCC	AGATGTTCCTTATCCACCTGGGCTGCAATGaGA	-	3	-	-	-	C>T	exon
NM_000017.4:c.164C>T	ACADS	Cas12a	Cas12a_323	12:120727121-120727146	+	CCGAGAAGGAGTTGTTTCtCA	TTTG	GGGACTTTGCCGAGAAGGAGTTGTTTCtCATTGC	-	1	-	55.1	-	C>T	exon
NM_000017.4:c.931C>T	ACADS	spCas9	spCas9_324	12:120738649-120738672	+	CACCAAGCTCCAGGTCATCt	AGG	CCTCACCAAGCTCCAGGTCATCtAGGTAAT	42.21	3	51.47	-	48.54	C>T	exon									0.032216
NM_000017.4:c.931C>T	ACADS	spCas9	spCas9_327	12:120738657-120738680	-	CCACCATTACCTaGATGACC	TGG	CTGCCACCATTACCTaGATGACCTGGAGCT	59.26	-5	60.69	-	72.42	C>T	exon									0.200113
NM_000017.4:c.369C>G	ACADS	spCas9	spCas9_328	12:120737346-120737369	+	GTCCTCCTAGTCTCTCTAgC	TGG	GCTGTCCTCCTAGTCTCTCTAgCTGGGGCC	36.27	2	27.92	-	59.45	C>G	exon									-0.199544
NM_000017.4:c.369C>G	ACADS	CasX	CasX_331	12:120737357-120737381	-	AGATGGGCCCCAGcTAGAGA	TTCA	CAAACTTCAAGATGGGCCCCAGcTAGAGAGACT	-	-6	-	-	-	C>G	exon
NM_000017.4:c.1086+2T>G	ACADS	spCas9	spCas9_332	12:120739175-120739198	+	CGCGACCGCCATCAGCCACC	AGG	GGCCGCGACCGCCATCAGCCACCAGGgGAG	62.59	7	64.63	-	88.47	T>G	intron									0.247043
NM_000017.4:c.1086+2T>G	ACADS	spCas9	spCas9_335	12:120739192-120739215	-	GCTCACTGTGGACACTCcCC	TGG	AGAGCTCACTGTGGACACTCcCCTGGTGGC	50.98	1	50.44	-	63.1	T>G	intron									0.0703687
NM_000017.4:c.1086+2T>G	ACADS	saCas9	saCas9_337	12:120739176-120739203	+	GCGACCGCCATCAGCCACCAG	GgGAGT	GCCGCGACCGCCATCAGCCACCAGGgGAGTGTCC	-	5	-	-	83.32	T>G	intron
NM_000017.4:c.989_990delinsAT	ACADS	spCas9	spCas9_338	12:120738868-120738891	-	CTTCAGCATGGCAGCatGCC	AGG	ATCCTTCAGCATGGCAGCatGCCAGGTCAG	54.78	-1	56.69	-	67.73	GC>AT	exon									0.14253
NM_000017.4:c.989_990delinsAT	ACADS	CasX	CasX_339	12:120738878-120738902	-	TGTTATCCTTCAGCATGGCA	TTCT	AAGGCTTCTTGTTATCCTTCAGCATGGCAGCat	-	5	-	-	-	GC>AT	exon
NM_000017.4:c.826del	ACADS	spCas9	spCas9_340	12:120738549-120738572	+	GCCGCATCGGCATcCCTCCC	AGG	TGGGCCGCATCGGCATcCCTCCCAGGCCCT	52.24	-4	58.76	-	70.17	CG>C	exon									0.144035
NM_000017.4:c.826del	ACADS	spCas9	spCas9_341	12:120738562-120738585	-	GGCAATGCCCAGGGCCTGGG	AGG	CTGGGCAATGCCCAGGGCCTGGGAGGgATG	48.11	7	54.17	-	64.66	CG>C	exon									0.0838834
NM_000017.4:c.826del	ACADS	saCas9	saCas9_344	12:120738559-120738586	-	GGGCAATGCCCAGGGCCTGGG	AGGgAT	TCTGGGCAATGCCCAGGGCCTGGGAGGgATGCCG	-	7	-	-	67.24	CG>C	exon
NM_000017.4:c.492_513del	ACADS	spCas9	spCas9_345	12:120737833-120737856	+	GCAGGGAACGGCAGTGATGC	aGG	TGGGCAGGGAACGGCAGTGATGCaGGGCCG	58.19	4	68.22	-	64.75	AGGAGCTGCGTCCACCACCGCCC>A	exon									0.258201
NM_000017.4:c.492_513del	ACADS	CasX	CasX_349	12:120737857-120737881	-	GAACCCATGAGTCGCCCTCG	TTCA	TTCCATTCAGAACCCATGAGTCGCCCTCGGCCC	-	6	-	-	-	AGGAGCTGCGTCCACCACCGCCC>A	exon
NM_000017.4:c.682_683del	ACADS	spCas9	spCas9_350	12:120738325-120738348	+	TTGGGGAAGAaAAGACAAGC	TGG	ACGTTGGGGAAGAaAAGACAAGCTGGGCAT	64.05	-7	59.95	-	72.74	AAG>A	exon									0.221817
NM_000017.4:c.409C>T	ACADS	spCas9	spCas9_351	12:120737385-120737408	+	TGGCTCCAAGGAGCAGAAGt	AGG	GTTTGGCTCCAAGGAGCAGAAGtAGGCGTG	47.23	3	56.83	-	48.38	C>T	exon									0.105616
NM_000017.4:c.409C>T	ACADS	saCas9	saCas9_354	12:120737388-120737415	+	CTCCAAGGAGCAGAAGtAGGC	GTGGGT	TGGCTCCAAGGAGCAGAAGtAGGCGTGGGTCACG	-	-2	-	-	46.78	C>T	exon
NM_000017.4:c.409C>T	ACADS	Cas12a	Cas12a_355	12:120737383-120737408	+	GCTCCAAGGAGCAGAAGtAGG	TTTG	TGAAGTTTGGCTCCAAGGAGCAGAAGtAGGCGTG	-	-1	-	64.98	-	C>T	exon
NM_000017.4:c.814C>T	ACADS	spCas9	spCas9_356	12:120738536-120738559	+	ACCCTGGACATGGGCtGCAT	CGG	CAAACCCTGGACATGGGCtGCATCGGCATC	45.83	-2	34.23	-	70.21	C>T	exon									-0.0952153
NM_000017.4:c.814C>T	ACADS	saCas9	saCas9_357	12:120738535-120738562	-	GATGCCGATGCaGCCCATGTC	CAGGGT	GGCGATGCCGATGCaGCCCATGTCCAGGGTTTGC	-	-7	-	-	62.17	C>T	exon
NM_000017.4:c.362_363CT[2]	ACADS	spCas9	spCas9_358	12:120737344-120737367	+	CTGTCCTCCTAgTCTCTACC	TGG	CCGCTGTCCTCCTAgTCTCTACCTGGGGCC	51.73	-6	61.02	-	72.89	GTC>G	exon									0.158839
NM_000017.4:c.362_363CT[2]	ACADS	spCas9	spCas9_360	12:120737350-120737373	-	ATGGGCCCCAGGTAGAGAcT	AGG	AAGATGGGCCCCAGGTAGAGAcTAGGAGGA	51.69	2	58.01	-	76	GTC>G	exon									0.132882
NM_000017.4:c.362_363CT[2]	ACADS	CasX	CasX_362	12:120737355-120737379	-	AGATGGGCCCCAGGTAGAGA	TTCA	CAAACTTCAAGATGGGCCCCAGGTAGAGAcTAG	-	2	-	-	-	GTC>G	exon
NM_000017.4:c.136C>T	ACADS	spCas9	spCas9_363	12:120727095-120727118	+	AGATGTTGCTCCAGACATGC	tGG	ACCAGATGTTGCTCCAGACATGCtGGGACT	58.86	4	60.5	-	67.2	C>T	exon									0.197811
NM_000017.4:c.136C>T	ACADS	spCas9	spCas9_365	12:120727104-120727127	-	CGGCAAAGTCCCaGCATGTC	TGG	TCTCGGCAAAGTCCCaGCATGTCTGGAGCA	47.69	-5	24.18	-	69.88	C>T	exon									-0.167008
NM_000017.4:c.136C>T	ACADS	CasX	CasX_366	12:120727107-120727131	-	CGGCAAAGTCCCaGCATGTC	TTCT	ACTCCTTCTCGGCAAAGTCCCaGCATGTCTGGA	-	-7	-	-	-	C>T	exon
NM_000017.4:c.529T>C	ACADS	spCas9	spCas9_367	12:120737873-120737896	+	CCCGGGCCGAGGGCGACTCA	cGG	CCGCCCGGGCCGAGGGCGACTCAcGGGTTC	48.93	4	34.45	-	65.93	T>C	exon									-0.0740484
NM_000017.4:c.529T>C	ACADS	saCas9	saCas9_369	12:120737871-120737898	+	CGCCCGGGCCGAGGGCGACTC	AcGGGT	CACCGCCCGGGCCGAGGGCGACTCAcGGGTTCTG	-	5	-	-	67.11	T>C	exon
NM_000017.4:c.529T>C	ACADS	saCas9	saCas9_371	12:120737887-120737914	-	CTTTGGTTCCATTCAGAACCC	gTGAGT	AGGCTTTGGTTCCATTCAGAACCCgTGAGTCGCC	-	4	-	-	69.53	T>C	exon
NM_000017.4:c.529T>C	ACADS	Cas12a	Cas12a_372	12:120737888-120737913	-	GTTCCATTCAGAACCCgTGAG	TTTG	CAGGCTTTGGTTCCATTCAGAACCCgTGAGTCGC	-	-2	-	43.52	-	T>C	exon
NM_000017.4:c.319C>T	ACADS	spCas9	spCas9_373	12:120737076-120737099	+	GCCATGGAGGAGATCAGCtG	TGG	ATCGCCATGGAGGAGATCAGCtGTGGCTGC	65.57	2	66.09	-	57.93	C>T	exon									0.285722
NM_000017.4:c.3G>A	ACADS	spCas9	spCas9_374	12:120725883-120725906	-	GGCGAGCAGCGCGGCGGCtA	TGG	CCGGGCGAGCAGCGCGGCGGCtATGGGCGA	30.26	2	23.62	-	59.53	G>A	exon									-0.269959
NM_000017.4:c.2T>C	ACADS	spCas9	spCas9_376	12:120725867-120725890	+	GGGACTGTGTCTGTCGCCCA	cGG	CCTGGGACTGTGTCTGTCGCCCAcGGCCGC	53.06	4	59.76	-	62.77	T>C	start_codon									0.159296
NM_000017.4:c.2T>C	ACADS	spCas9	spCas9_377	12:120725883-120725906	-	GGCGAGCAGCGCGGCGGCCg	TGG	CCGGGCGAGCAGCGCGGCGGCCgTGGGCGA	30.06	3	38.09	-	60.26	T>C	start_codon									-0.15224
NM_000017.4:c.514dup	ACADS	spCas9	spCas9_379	12:120737857-120737880	+	GCTGCGTCCACCACCGCCcg	CGG	GGAGCTGCGTCCACCACCGCCcgCGGGCCG	41.87	2	41.99	-	53.72	C>CG	exon									-0.0493746
NM_000017.4:c.514dup	ACADS	spCas9	spCas9_383	12:120737873-120737896	-	CATGAGTCGCCCTCGGCCCG	cgG	ACCCATGAGTCGCCCTCGGCCCGcgGGCGG	41.75	5	40.3	-	62.45	C>CG	exon									-0.0666449
NM_004302.5:c.1159_1163del	ACVR1B	spCas9	spCas9_388	12:51986827-51986850	-	TATTAATGGTTaAGTACTTC	AGG	TCATATTAATGGTTaAGTACTTCAGGGGCC	49.99	-6	25.29	-	67.18	TGATGA>T	exon									-0.143655
NM_004302.5:c.1159_1163del	ACVR1B	Cas12a	Cas12a_390	12:51986830-51986855	-	ATATTAATGGTTaAGTACTTC	TTTC	AAGTGTTTCATATTAATGGTTaAGTACTTCAGGG	-	-6	-	30.77	-	TGATGA>T	exon
NM_004302.5:c.912G>A	ACVR1B	spCas9	spCas9_391	12:51984087-51984110	+	AATTGAGGGGATaATTAAGC	TGG	GACAATTGAGGGGATaATTAAGCTGGCCTT	62.85	-5	61.36	-	58.26	G>A	exon									0.230849
NM_000020.3:c.1436G>C	ACVRL1	spCas9	spCas9_392	12:51920815-51920838	-	TTGATCCGCAGCGCGGTGAG	TgG	TTCTTGATCCGCAGCGCGGTGAGTgGGGCA	49.18	5	35.06	-	66.89	G>C	exon									-0.0678642
NM_000020.3:c.1436G>C	ACVRL1	saCas9	saCas9_398	12:51920804-51920831	-	GCAGCGCGGTGAGTgGGGCAG	AGGGGT	TCCGCAGCGCGGTGAGTgGGGCAGAGGGGTTTGG	-	-4	-	-	68.79	G>C	exon
NM_000020.3:c.1436G>C	ACVRL1	CasX	CasX_399	12:51920817-51920841	-	TGATCCGCAGCGCGGTGAGT	TTCT	GTGTCTTCTTGATCCGCAGCGCGGTGAGTgGGG	-	2	-	-	-	G>C	exon
NM_000020.3:c.598C>G	ACVRL1	spCas9	spCas9_400	12:51914025-51914048	+	CTGGTGCAGAGGACAGTGGC	AgG	TTCCTGGTGCAGAGGACAGTGGCAgGGCAG	59.89	5	58.32	-	59.95	C>G	intron									0.188074
NM_000020.3:c.598C>G	ACVRL1	CasX	CasX_403	12:51914022-51914046	+	TGGTGCAGAGGACAGTGGCA	TTCC	TCCCCTTCCTGGTGCAGAGGACAGTGGCAgGGC	-	2	-	-	-	C>G	intron
NM_000020.3:c.1450C>G	ACVRL1	spCas9	spCas9_404	12:51920809-51920832	+	CTCTGCCCGACTCACCGCGC	TGg	CCCCTCTGCCCGACTCACCGCGCTGgGGAT	38.05	6	42.37	-	81.51	C>G	exon									-0.0769608
NM_000020.3:c.1450C>G	ACVRL1	spCas9	spCas9_407	12:51920822-51920845	-	TGTCTTCTTGATCCcCAGCG	CGG	TAGTGTCTTCTTGATCCcCAGCGCGGTGAG	48.15	-3	46.55	-	49.67	C>G	exon									0.0259631
NM_000020.3:c.1450C>G	ACVRL1	saCas9	saCas9_408	12:51920809-51920836	+	CTCTGCCCGACTCACCGCGCT	GgGGAT	CCCCTCTGCCCGACTCACCGCGCTGgGGATCAAG	-	5	-	-	81.02	C>G	exon
NM_000020.3:c.1450C>G	ACVRL1	saCas9	saCas9_409	12:51920817-51920844	-	GTCTTCTTGATCCcCAGCGCG	GTGAGT	AGTGTCTTCTTGATCCcCAGCGCGGTGAGTCGGG	-	-5	-	-	54.19	C>G	exon
NM_000020.3:c.1450C>G	ACVRL1	Cas12a	Cas12a_410	12:51920827-51920852	-	TAGTGTCTTCTTGATCCcCAG	TTTG	AATTTTTTGTAGTGTCTTCTTGATCCcCAGCGCG	-	-1	-	26.57	-	C>G	exon
NM_000020.3:c.526-1G>A	ACVRL1	spCas9	spCas9_411	12:51913961-51913984	+	TCCGTACCCCCAaGACCTCC	TGG	CTCTCCGTACCCCCAaGACCTCCTGGACAG	53.67	-5	65.74	-	67.65	G>A	intron									0.210584
NM_000020.3:c.526-1G>A	ACVRL1	spCas9	spCas9_412	12:51913969-51913992	-	AGTCACTGTCCAGGAGGTCt	TGG	TGCAGTCACTGTCCAGGAGGTCtTGGGGGT	30.22	3	43.85	-	73.29	G>A	intron									-0.107868
NM_000020.3:c.526-1G>A	ACVRL1	saCas9	saCas9_417	12:51913965-51913992	-	AGTCACTGTCCAGGAGGTCtT	GGGGGT	TGCAGTCACTGTCCAGGAGGTCtTGGGGGTACGG	-	2	-	-	73.06	G>A	intron
NM_000020.3:c.352C>T	ACVRL1	spCas9	spCas9_418	12:51913581-51913604	+	GCCGGGAACAGATGGCtAGC	TGG	GCAGCCGGGAACAGATGGCtAGCTGGCCCT	40.88	-1	33.22	-	69.71	C>T	intron									-0.132201
NM_000020.3:c.352C>T	ACVRL1	CasX	CasX_419	12:51913572-51913596	+	GAGCAGCCGGGAACAGATGG	TTCG	CCTCCTTCGGAGCAGCCGGGAACAGATGGCtAG	-	3	-	-	-	C>T	intron
NM_000020.3:c.310G>T	ACVRL1	spCas9	spCas9_420	12:51913328-51913351	+	CAACGTGTCCCTGGTGCTGt	AGG	CCACAACGTGTCCCTGGTGCTGtAGGGTAC	53.04	3	64.14	-	57.96	G>T	intron									0.196699
NM_000020.3:c.310G>T	ACVRL1	spCas9	spCas9_422	12:51913336-51913359	-	TGGACGTACCCTaCAGCACC	AGG	AGCTGGACGTACCCTaCAGCACCAGGGACA	76.01	-5	77.8	-	78.92	G>T	intron									0.436505
NM_000020.3:c.310G>T	ACVRL1	saCas9	saCas9_424	12:51913326-51913353	+	CACAACGTGTCCCTGGTGCTG	tAGGGT	AACCACAACGTGTCCCTGGTGCTGtAGGGTACGT	-	4	-	-	58.21	G>T	intron
NM_000020.3:c.663G>A	ACVRL1	spCas9	spCas9_425	12:51914459-51914482	+	GTGTGGCGGGGCTTGTGaCA	CGG	GAAGTGTGGCGGGGCTTGTGaCACGGTGAG	46.9	1	34.82	-	67.76	G>A	exon									-0.0833815
NM_000020.3:c.663G>A	ACVRL1	saCas9	saCas9_426	12:51914462-51914489	+	TGGCGGGGCTTGTGaCACGGT	GAGAGT	GTGTGGCGGGGCTTGTGaCACGGTGAGAGTGTGG	-	-4	-	-	69	G>A	exon
NM_000020.3:c.1048+2T>C	ACVRL1	spCas9	spCas9_427	12:51915479-51915502	+	CAGTGTTGCATCGCCGACCT	GGG	CTGCAGTGTTGCATCGCCGACCTGGGcGAG	60.55	7	62.67	-	65.28	T>C	intron									0.226099
NM_000020.3:c.1048+2T>C	ACVRL1	spCas9	spCas9_432	12:51915495-51915518	-	CTGCCCCGCCCGGCTCgCCC	AGG	CCCCTGCCCCGCCCGGCTCgCCCAGGTCGG	36.38	-1	66.2	-	63.31	T>C	intron									0.115012
NM_000020.3:c.1189G>A	ACVRL1	spCas9	spCas9_434	12:51916162-51916185	+	CCTACAAGTGGACTaACATC	TGG	AGTCCTACAAGTGGACTaACATCTGGGCCT	59.7	-3	45.71	-	58.97	G>A	exon									0.083471
NM_000020.3:c.1189G>A	ACVRL1	Cas12a	Cas12a_436	12:51916155-51916180	+	AGTCCTACAAGTGGACTaACA	TTTG	ACTGCTTTGAGTCCTACAAGTGGACTaACATCTG	-	-1	-	70.97	-	G>A	exon
NM_000020.3:c.1197G>A	ACVRL1	spCas9	spCas9_437	12:51916170-51916193	+	TGGACTGACATCTGaGCCTT	TGG	AAGTGGACTGACATCTGaGCCTTTGGCCTG	45.25	-3	44.09	-	68.15	G>A	exon									-0.016805
NM_000020.3:c.361del	ACVRL1	spCas9	spCas9_438	12:51913581-51913604	+	GCCGGGAACAGATGGCCAGC	TGg	GCAGCCGGGAACAGATGGCCAGCTGgCCTG	53.04	6	51.13	-	66.19	GC>G	intron									0.087102
NM_000020.3:c.361del	ACVRL1	spCas9	spCas9_441	12:51913603-51913626	-	CCAGCACGGGGCCCAGGATC	AGG	AGGCCAGCACGGGGCCCAGGATCAGGcCAG	49.96	7	68.19	-	66.5	GC>G	intron									0.209497
NM_000020.3:c.1196G>A	ACVRL1	spCas9	spCas9_443	12:51916163-51916186	+	CTACAAGTGGACTGACATCT	aGG	GTCCTACAAGTGGACTGACATCTaGGCCTT	47.98	4	65.64	-	58.66	G>A	exon									0.179367
NM_000020.3:c.1196G>A	ACVRL1	Cas12a	Cas12a_445	12:51916155-51916180	+	AGTCCTACAAGTGGACTGACA	TTTG	ACTGCTTTGAGTCCTACAAGTGGACTGACATCTa	-	7	-	67.68	-	G>A	exon
NM_000020.3:c.400del	ACVRL1	spCas9	spCas9_446	12:51913620-51913643	+	CGTGCTGGCCTTGCTGGCCC	TGG	CCCCGTGCTGGCCTTGCTGGCCCTGGtGCC	34.12	7	55.16	-	45.96	TG>T	intron									0.0162667
NM_000020.3:c.400del	ACVRL1	spCas9	spCas9_449	12:51913637-51913660	-	CCCAGGACACCCAGGGCaCC	AGG	AGGCCCAGGACACCCAGGGCaCCAGGGCCA	66.12	1	74.58	-	59.34	TG>T	intron									0.358378
NM_000020.3:c.400del	ACVRL1	saCas9	saCas9_451	12:51913626-51913653	+	GGCCTTGCTGGCCCTGGtGCC	CTGGGT	GCTGGCCTTGCTGGCCCTGGtGCCCTGGGTGTCC	-	-1	-	-	52.74	TG>T	intron
NM_000020.3:c.433del	ACVRL1	spCas9	spCas9_452	12:51913657-51913680	+	CTGGGCCTGTGGCATGTCCG	aGG	GTCCTGGGCCTGTGGCATGTCCGaGGAGGC	43.31	4	57.07	-	67.85	AC>A	intron									0.0788309
NM_000020.3:c.433del	ACVRL1	spCas9	spCas9_455	12:51913673-51913696	-	CGCTGCTTCTCCTGCCTCCt	CGG	CCACGCTGCTTCTCCTGCCTCCtCGGACAT	41.89	3	42.77	-	58.63	AC>A	intron									-0.0443343
NM_000020.3:c.1008_1009del	ACVRL1	spCas9	spCas9_456	12:51915440-51915463	+	GACTTCAAGAGCCGCAATGt	TGG	CGCGACTTCAAGAGCCGCAATGtTGGTCAA	41	3	58.13	-	60.04	TGC>T	exon									0.076485
NM_000020.3:c.1008_1009del	ACVRL1	spCas9	spCas9_457	12:51915450-51915473	-	GTTGCTCTTGACCAaCATTG	CGG	CAGGTTGCTCTTGACCAaCATTGCGGCTCT	37.06	-3	41.78	-	75.31	TGC>T	exon									-0.0856924
NM_000020.3:c.1008_1009del	ACVRL1	CasX	CasX_458	12:51915443-51915467	+	AGAGCCGCAATGtTGGTCAA	TTCA	GCGACTTCAAGAGCCGCAATGtTGGTCAAGAGC	-	-7	-	-	-	TGC>T	exon
NM_000020.3:c.1445C>A	ACVRL1	spCas9	spCas9_459	12:51920811-51920834	+	CTGCCCGACTCACCGaGCTG	CGG	CCTCTGCCCGACTCACCGaGCTGCGGATCA	49.19	-2	53.84	-	73.57	C>A	exon									0.0847405
NM_000020.3:c.1445C>A	ACVRL1	spCas9	spCas9_460	12:51920822-51920845	-	TGTCTTCTTGATCCGCAGCt	CGG	TAGTGTCTTCTTGATCCGCAGCtCGGTGAG	40.6	3	45.75	-	50.65	C>A	exon									-0.0248849
NM_000020.3:c.1445C>A	ACVRL1	saCas9	saCas9_463	12:51920809-51920836	+	CTCTGCCCGACTCACCGaGCT	GCGGAT	CCCCTCTGCCCGACTCACCGaGCTGCGGATCAAG	-	-1	-	-	79.14	C>A	exon
NM_000020.3:c.1445C>A	ACVRL1	saCas9	saCas9_464	12:51920817-51920844	-	GTCTTCTTGATCCGCAGCtCG	GTGAGT	AGTGTCTTCTTGATCCGCAGCtCGGTGAGTCGGG	-	1	-	-	53.6	C>A	exon
NM_000020.3:c.1445C>A	ACVRL1	Cas12a	Cas12a_465	12:51920827-51920852	-	TAGTGTCTTCTTGATCCGCAG	TTTG	AATTTTTTGTAGTGTCTTCTTGATCCGCAGCtCG	-	5	-	21.76	-	C>A	exon
NM_000020.3:c.1297C>T	ACVRL1	spCas9	spCas9_466	12:51919025-51919048	+	GCCCAATGACtCCAGCTTTG	AGG	GGTGCCCAATGACtCCAGCTTTGAGGACAT	36.15	-7	23.7	-	49.73	C>T	exon									-0.232016
NM_000020.3:c.1297C>T	ACVRL1	spCas9	spCas9_467	12:51919035-51919058	-	CTTCTTCATGTCCTCAAAGC	TGG	CACCTTCTTCATGTCCTCAAAGCTGGaGTC	43.64	7	32.85	-	56.98	C>T	exon									-0.115295
NM_000020.3:c.1297C>T	ACVRL1	saCas9	saCas9_470	12:51919032-51919059	-	CCTTCTTCATGTCCTCAAAGC	TGGaGT	CCACCTTCTTCATGTCCTCAAAGCTGGaGTCATT	-	7	-	-	59.66	C>T	exon
NM_000020.3:c.1297C>T	ACVRL1	CasX	CasX_471	12:51919011-51919035	+	ATGATGTGGTGCCCAATGAC	TTCT	CACCCTTCTATGATGTGGTGCCCAATGACtCCA	-	2	-	-	-	C>T	exon
NM_000020.3:c.1297C>T	ACVRL1	CasX	CasX_472	12:51919033-51919057	-	TCATGTCCTCAAAGCTGGaG	TTCT	CCACCTTCTTCATGTCCTCAAAGCTGGaGTCAT	-	-1	-	-	-	C>T	exon
NM_000020.3:c.1396C>T	ACVRL1	spCas9	spCas9_474	12:51920766-51920789	+	CAGGCCTAGCTtAGATGATG	CGG	TCTCAGGCCTAGCTtAGATGATGCGGGAGT	53.57	-6	62.85	-	73.86	C>T	exon									0.18432
NM_000020.3:c.1396C>T	ACVRL1	spCas9	spCas9_476	12:51920769-51920792	-	ACTCCCGCATCATCTaAGCT	AGG	AGCACTCCCGCATCATCTaAGCTAGGCCTG	52.69	-2	72.59	-	66.7	C>T	exon									0.261551
NM_000020.3:c.1396C>T	ACVRL1	saCas9	saCas9_477	12:51920766-51920793	+	CAGGCCTAGCTtAGATGATGC	GGGAGT	TCTCAGGCCTAGCTtAGATGATGCGGGAGTGCTG	-	-7	-	-	74.55	C>T	exon
NM_000020.3:c.1396C>T	ACVRL1	Cas12a	Cas12a_478	12:51920780-51920805	-	GGTACCAGCACTCCCGCATCA	TTTG	AGGGGTTTGGGTACCAGCACTCCCGCATCATCTa	-	7	-	84.88	-	C>T	exon
NM_000020.3:c.1069C>T	ACVRL1	spCas9	spCas9_479	12:51916037-51916060	+	CCTGGCTGTGATGCACTCAt	AGG	AGGCCTGGCTGTGATGCACTCAtAGGGCAG	48.53	3	46.14	-	65.52	C>T	exon									0.0199703
NM_000020.3:c.1069C>T	ACVRL1	saCas9	saCas9_481	12:51916050-51916077	-	TGTCCAGGTAATCGCTGCCCT	aTGAGT	CGATGTCCAGGTAATCGCTGCCCTaTGAGTGCAT	-	4	-	-	47.04	C>T	exon
NM_000020.3:c.871A>T	ACVRL1	spCas9	spCas9_482	12:51915313-51915336	+	CTTTCTGCAGtGACAGACGC	TGG	CGACTTTCTGCAGtGACAGACGCTGGAGCC	50.79	-7	45.76	-	57.04	A>T	exon									0.0325871
NM_000020.3:c.525+1G>T	ACVRL1	spCas9	spCas9_483	12:51913748-51913771	+	AGCAGGGCGACAGCATGTTG	GGG	CTGAGCAGGGCGACAGCATGTTGGGGtTAT	64.47	7	73.26	-	71.05	G>T	intron									0.334336
NM_000020.3:c.412_413del	ACVRL1	spCas9	spCas9_488	12:51913636-51913659	+	GCCCTGGTGGCCCTGGGTGT	cGG	CTGGCCCTGGTGGCCCTGGGTGTcGGGCCT	31.57	4	18.59	-	60.16	CCT>C	intron									-0.303926
NM_000020.3:c.412_413del	ACVRL1	spCas9	spCas9_491	12:51913646-51913669	-	ATGCCACAGGCCCgACACCC	AGG	GACATGCCACAGGCCCgACACCCAGGGCCA	60.39	-4	60.77	-	69.47	CCT>C	intron									0.208251
NM_000020.3:c.362_374del	ACVRL1	spCas9	spCas9_493	12:51913581-51913604	+	GCCGGGAACAGATGGCCAGC	tGG	GCAGCCGGGAACAGATGGCCAGCtGGCCCC	52.95	4	42.01	-	64.93	TGGCCCTGATCCTG>T	intron									0.0118932
NM_000020.3:c.362_374del	ACVRL1	spCas9	spCas9_494	12:51913595-51913618	-	AAGGCCAGCACGGGGCCaGC	TGG	AGCAAGGCCAGCACGGGGCCaGCTGGCCAT	42.18	1	31.38	-	75.39	TGGCCCTGATCCTG>T	intron									-0.141507
NM_000020.3:c.362_374del	ACVRL1	CasX	CasX_495	12:51913572-51913596	+	GAGCAGCCGGGAACAGATGG	TTCG	CCTCCTTCGGAGCAGCCGGGAACAGATGGCCAG	-	7	-	-	-	TGGCCCTGATCCTG>T	intron
NM_000020.3:c.990C>G	ACVRL1	spCas9	spCas9_496	12:51915435-51915458	-	CATTGCGGCTCTTGAAcTCG	CGG	GCACATTGCGGCTCTTGAAcTCGCGGTGGG	39.84	-1	32.11	-	59.27	C>G	exon									-0.144212
NM_000020.3:c.1010del	ACVRL1	spCas9	spCas9_499	12:51915441-51915464	+	ACTTCAAGAGCCGCAATGTG	cGG	GCGACTTCAAGAGCCGCAATGTGcGGTCAA	52.34	4	55.59	-	61.71	CT>C	exon									0.121103
NM_000020.3:c.1010del	ACVRL1	spCas9	spCas9_500	12:51915450-51915473	-	TTGCTCTTGACCgCACATTG	CGG	AGGTTGCTCTTGACCgCACATTGCGGCTCT	30.73	-5	44.71	-	78.09	CT>C	exon									-0.0992824
NM_000020.3:c.1010del	ACVRL1	CasX	CasX_501	12:51915443-51915467	+	AGAGCCGCAATGTGcGGTCA	TTCA	GCGACTTCAAGAGCCGCAATGTGcGGTCAAGAG	-	-5	-	-	-	CT>C	exon
NM_000020.3:c.1133C>T	ACVRL1	spCas9	spCas9_502	12:51916103-51916126	+	CAAGCGGTACATGGCACtCG	AGG	CACCAAGCGGTACATGGCACtCGAGGTGCT	58.87	1	49.89	-	72.48	C>T	exon									0.108927
NM_000020.3:c.1133C>T	ACVRL1	saCas9	saCas9_504	12:51916117-51916144	-	CGGATCTGCTCGTCCAGCACC	TCGaGT	GTGCGGATCTGCTCGTCCAGCACCTCGaGTGCCA	-	7	-	-	60.83	C>T	exon
NM_000020.3:c.1133C>A	ACVRL1	spCas9	spCas9_505	12:51916103-51916126	+	CAAGCGGTACATGGCACaCG	AGG	CACCAAGCGGTACATGGCACaCGAGGTGCT	68.69	1	61.76	-	70.18	C>A	exon									0.264515
NM_000020.3:c.1055del	ACVRL1	spCas9	spCas9_507	12:51916019-51916042	+	AGGCCTCACCCCCACAGGCC	TGg	GACAGGCCTCACCCCCACAGGCCTGgTGTG	36.21	6	26.99	-	57.45	GC>G	exon									-0.206938
NM_000020.3:c.1055del	ACVRL1	spCas9	spCas9_508	12:51916036-51916059	-	CCCTGTGAGTGCATCACAcC	AGG	CTGCCCTGTGAGTGCATCACAcCAGGCCTG	63.96	2	81.75	-	69.66	GC>G	exon									0.401673
NM_000020.3:c.1055del	ACVRL1	saCas9	saCas9_511	12:51916025-51916052	-	AGTGCATCACAcCAGGCCTGT	GGGGGT	GTGAGTGCATCACAcCAGGCCTGTGGGGGTGAGG	-	-7	-	-	67.55	GC>G	exon
NM_000020.3:c.525+1G>C	ACVRL1	spCas9	spCas9_512	12:51913748-51913771	+	AGCAGGGCGACAGCATGTTG	GGG	CTGAGCAGGGCGACAGCATGTTGGGGcTAT	64.47	7	76.68	-	69.46	G>C	intron									0.362971
NM_000020.3:c.525+3A>G	ACVRL1	spCas9	spCas9_517	12:51913754-51913777	+	GCGACAGCATGTTGGGGGTg	TGG	AGGGCGACAGCATGTTGGGGGTgTGGGCCT	45.82	3	34.95	-	73.21	A>G	intron									-0.0902614
NM_000020.3:c.583C>T	ACVRL1	spCas9	spCas9_522	12:51914014-51914037	+	GGCTCCCCTTCCTGGTGtAG	AGG	CAGGGCTCCCCTTCCTGGTGtAGAGGACAG	43.27	1	51.73	-	74.77	C>T	intron									0.0325342
NM_000020.3:c.583C>T	ACVRL1	spCas9	spCas9_524	12:51914023-51914046	-	GTGCCACTGTCCTCTaCACC	AGG	GCCGTGCCACTGTCCTCTaCACCAGGAAGG	69.5	-2	80.13	-	65.28	C>T	intron									0.421933
NM_004281.4:c.160del	BAG3	spCas9	spCas9_0	10:119651824-119651847	+	ACGACCCGCGcTGCCCTCTG	AGG	GGAACGACCCGCGcTGCCCTCTGAGGGCCC	46.74	-7	38.9	-	65.51	CG>C	exon									-0.050044
NM_004281.4:c.160del	BAG3	spCas9	spCas9_1	10:119651828-119651851	-	GGGGCCCTCAGAGGGCAgCG	CGG	CTTGGGGCCCTCAGAGGGCAgCGCGGGTCG	49.13	1	38.55	-	74.01	CG>C	exon									-0.0415984
NM_004281.4:c.160del	BAG3	saCas9	saCas9_3	10:119651826-119651853	-	TTGGGGCCCTCAGAGGGCAgC	GCGGGT	ACCTTGGGGCCCTCAGAGGGCAgCGCGGGTCGTT	-	2	-	-	75.69	CG>C	exon
NM_004281.4:c.803C>A	BAG3	spCas9	spCas9_4	10:119672539-119672562	+	CCCGTTCAGGTaATCTGTCC	AGG	ATCCCCGTTCAGGTaATCTGTCCAGGGTGC	62.21	-6	62.54	-	67.91	C>A	exon									0.233894
NM_004281.4:c.803C>A	BAG3	spCas9	spCas9_6	10:119672539-119672562	-	CCCTGGACAGATtACCTGAA	CGG	GCACCCTGGACAGATtACCTGAACGGGGAT	44.93	-5	38.88	-	69.52	C>A	exon									-0.0619706
NM_004281.4:c.803C>A	BAG3	saCas9	saCas9_9	10:119672537-119672564	+	TCCCCGTTCAGGTaATCTGTC	CAGGGT	GCATCCCCGTTCAGGTaATCTGTCCAGGGTGCAT	-	-5	-	-	62.2	C>A	exon
NM_004281.4:c.803C>A	BAG3	saCas9	saCas9_10	10:119672535-119672562	-	CCCTGGACAGATtACCTGAAC	GGGGAT	GCACCCTGGACAGATtACCTGAACGGGGATGCCG	-	-6	-	-	69.51	C>A	exon
NM_004281.4:c.1296_1297inv	BAG3	spCas9	spCas9_11	10:119676832-119676855	+	AGCCATCCTGGAGAAGGTgt	AGG	GGAAGCCATCCTGGAGAAGGTgtAGGGGCT	54.33	2	50.9	-	59.57	AC>GT	exon									0.0947382
NM_004281.4:c.1296_1297inv	BAG3	spCas9	spCas9_15	10:119676837-119676860	-	CCAGCCCCTacACCTTCTCC	AGG	GCTCCAGCCCCTacACCTTCTCCAGGATGG	56.86	-7	73.93	-	45.8	AC>GT	exon									0.303233
NM_004281.4:c.1296_1297inv	BAG3	saCas9	saCas9_16	10:119676835-119676862	-	CTCCAGCCCCTacACCTTCTC	CAGGAT	CTGCTCCAGCCCCTacACCTTCTCCAGGATGGCT	-	-6	-	-	49.07	AC>GT	exon
NM_004281.4:c.824del	BAG3	spCas9	spCas9_17	10:119672552-119672575	+	TCTGTCCAGGGTGCATCGaC	CGG	TCATCTGTCCAGGGTGCATCGaCCGGGAGG	50.54	2	50.33	-	64.32	AG>A	exon									0.0665292
NM_004281.4:c.824del	BAG3	spCas9	spCas9_21	10:119672570-119672593	-	TCCTGGCTGGTGAGCCCTCC	CGG	TGCTCCTGGCTGGTGAGCCCTCCCGGtCGA	42.72	7	41.98	-	68.93	AG>A	exon									-0.049143
NM_004281.4:c.824del	BAG3	CasX	CasX_22	10:119672543-119672567	+	GGTCATCTGTCCAGGGTGCA	TTCA	CCCCGTTCAGGTCATCTGTCCAGGGTGCATCGa	-	5	-	-	-	AG>A	exon
NM_004281.4:c.811C>T	BAG3	spCas9	spCas9_23	10:119672539-119672562	+	CCCGTTCAGGTCATCTGTCt	AGG	ATCCCCGTTCAGGTCATCTGTCtAGGGTGC	52.3	3	46.07	-	66.35	C>T	exon									0.0410942
NM_004281.4:c.811C>T	BAG3	saCas9	saCas9_25	10:119672537-119672564	+	TCCCCGTTCAGGTCATCTGTC	tAGGGT	GCATCCCCGTTCAGGTCATCTGTCtAGGGTGCAT	-	4	-	-	60.35	C>T	exon
NM_004281.4:c.654del	BAG3	spCas9	spCas9_26	10:119672397-119672420	-	AAGGAGGGCTGGGCTGCTGG	CgG	TGGAAGGAGGGCTGGGCTGCTGGCgGGTAA	47.31	5	57.26	-	71.04	CG>C	exon									0.102715
NM_004281.4:c.654del	BAG3	saCas9	saCas9_28	10:119672395-119672422	-	GGAAGGAGGGCTGGGCTGCTG	GCgGGT	GGTGGAAGGAGGGCTGGGCTGCTGGCgGGTAACG	-	6	-	-	66.93	CG>C	exon
NM_004281.4:c.654del	BAG3	CasX	CasX_29	10:119672370-119672394	+	GGTGATACACGAGCAGAACG	TTCC	CTCCATTCCGGTGATACACGAGCAGAACGTTAC	-	7	-	-	-	CG>C	exon
NM_004281.4:c.96_97del	BAG3	spCas9	spCas9_30	10:119651755-119651778	+	AGATCAAGATCGACcCAGAC	CGG	GGGAGATCAAGATCGACcCAGACCGGCTGG	60.22	-3	66.01	-	71.01	CCG>C	exon									0.249923
NM_004281.4:c.96_97del	BAG3	spCas9	spCas9_32	10:119651768-119651791	-	CGAAGAAGGGCCAGCCGGTC	TGg	CCACGAAGAAGGGCCAGCCGGTCTGgGTCG	49.02	6	50.61	-	65.51	CCG>C	exon									0.0596202
NM_004281.4:c.96_97del	BAG3	saCas9	saCas9_34	10:119651766-119651793	-	CACGAAGAAGGGCCAGCCGGT	CTGgGT	GTCCACGAAGAAGGGCCAGCCGGTCTGgGTCGAT	-	7	-	-	70.09	CCG>C	exon
NM_004281.4:c.530_531del	BAG3	spCas9	spCas9_35	10:119672273-119672296	-	GAGGATGAGGATGAGCAGTC	AGg	GAGGAGGATGAGGATGAGCAGTCAGgCAGC	54.15	6	65.89	-	61.46	CCT>C	exon									0.2165
NM_004281.4:c.751del	BAG3	spCas9	spCas9_37	10:119672478-119672501	+	AGCCTGTGTACCACAAGAtC	AGG	ACCAGCCTGTGTACCACAAGAtCAGGGGGA	55.72	2	59.25	-	58.32	TC>T	exon									0.171944
NM_004281.4:c.751del	BAG3	spCas9	spCas9_41	10:119672487-119672510	-	CAGTCATCCCCCTGaTCTTG	TGG	TCCCAGTCATCCCCCTGaTCTTGTGGTACA	46.32	-3	34.24	-	53.38	TC>T	exon									-0.0871502
NM_004281.4:c.751del	BAG3	saCas9	saCas9_42	10:119672479-119672506	+	GCCTGTGTACCACAAGAtCAG	GGGGAT	CCAGCCTGTGTACCACAAGAtCAGGGGGATGACT	-	-1	-	-	55.61	TC>T	exon
NM_004281.4:c.447dup	BAG3	spCas9	spCas9_43	10:119670108-119670131	-	CTGTCCACACTGTTTAtaTC	TGG	CACCTGTCCACACTGTTTAtaTCTGGCTGA	47.46	1	26.33	-	51.77	T>TA	exon									-0.14513
NM_004281.4:c.447dup	BAG3	saCas9	saCas9_44	10:119670102-119670129	-	GTCCACACTGTTTAtaTCTGG	CTGAGT	CCTGTCCACACTGTTTAtaTCTGGCTGAGTGGTT	-	-3	-	-	59.35	T>TA	exon
NM_004281.4:c.699C>A	BAG3	spCas9	spCas9_45	10:119672446-119672469	-	TGGTACTCCCCCTGCTGCGC	TGG	GTCTGGTACTCCCCCTGCTGCGCTGGtTAG	42.04	7	57.18	-	41.12	C>A	exon									0.0804878
NM_004281.4:c.699C>A	BAG3	CasX	CasX_46	10:119672420-119672444	+	ACCAAGCCCAGAAGACGCAC	TTCC	CCTCCTTCCACCAAGCCCAGAAGACGCACTAaC	-	4	-	-	-	C>A	exon
NM_004281.4:c.448_449del	BAG3	spCas9	spCas9_47	10:119670101-119670124	+	CCACTCAGCCAGATAaAGTG	TGG	AAACCACTCAGCCAGATAaAGTGTGGACAG	64.92	-2	69.27	-	68.52	AAC>A	exon									0.304884
NM_004281.4:c.448_449del	BAG3	spCas9	spCas9_49	10:119670108-119670131	-	CCACCTGTCCACACTtTATC	TGG	CTGCCACCTGTCCACACTtTATCTGGCTGA	54.47	-2	35.28	-	69.29	AAC>A	exon									-0.0359807
NM_004281.4:c.448_449del	BAG3	saCas9	saCas9_50	10:119670102-119670129	-	ACCTGTCCACACTtTATCTGG	CTGAGT	GCCACCTGTCCACACTtTATCTGGCTGAGTGGTT	-	-5	-	-	72.56	AAC>A	exon
NM_004281.4:c.1161dup	BAG3	spCas9	spCas9_51	10:119676704-119676727	-	CCACACTCTTGGGGGAgaAG	AGG	TAGCCACACTCTTGGGGGAgaAGAGGGGAC	44.75	1	34.88	-	79.95	T>TC	exon									-0.0991225
NM_004281.4:c.1161dup	BAG3	saCas9	saCas9_54	10:119676697-119676724	+	TGCTGTCCCCTCTtcTCCCCC	AAGAGT	TTCTGCTGTCCCCTCTtcTCCCCCAAGAGTGTGG	-	-5	-	-	59.57	T>TC	exon
NM_004281.4:c.1161dup	BAG3	CasX	CasX_55	10:119676694-119676718	+	GCTGTCCCCTCTtcTCCCCC	TTCT	GGCCCTTCTGCTGTCCCCTCTtcTCCCCCAAGA	-	-7	-	-	-	T>TC	exon
NM_004281.4:c.1161dup	BAG3	CasX	CasX_56	10:119676711-119676735	-	GTAGCCACACTCTTGGGGGA	TTCT	CTCTCTTCTGTAGCCACACTCTTGGGGGAgaAG	-	3	-	-	-	T>TC	exon
NM_004281.4:c.715G>T	BAG3	spCas9	spCas9_57	10:119672439-119672462	+	CGCACTACCCAGCGCAGCAG	GGG	AGACGCACTACCCAGCGCAGCAGGGGtAGT	62.01	7	63.22	-	38.91	G>T	exon									0.247165
NM_004281.4:c.1348A>T	BAG3	CasX	CasX_58	10:119676895-119676919	-	ATCATCAGGTACTaTTTGTC	TTCG	TACTCTTCGATCATCAGGTACTaTTTGTCAGTC	-	-6	-	-	-	A>T	exon
NM_004281.4:c.1348A>T	BAG3	Cas12a	Cas12a_59	10:119676878-119676903	+	AAGGCAAGAAGACTGACAAAt	TTTG	ACAACTTTGAAGGCAAGAAGACTGACAAAtAGTA	-	3	-	85.27	-	A>T	exon
NM_004281.4:c.709C>T	BAG3	spCas9	spCas9_60	10:119672437-119672460	+	GACGCACTACCCAGCGCAGt	AGG	GAAGACGCACTACCCAGCGCAGtAGGGGGA	48.34	3	44.87	-	49.71	C>T	exon									0.0132288
NM_004281.4:c.709C>T	BAG3	spCas9	spCas9_64	10:119672446-119672469	-	TGGTACTCCCCCTaCTGCGC	TGG	GTCTGGTACTCCCCCTaCTGCGCTGGGTAG	50.79	-4	55.18	-	40.58	C>T	exon									0.115142
NM_004281.4:c.709C>T	BAG3	saCas9	saCas9_66	10:119672439-119672466	+	CGCACTACCCAGCGCAGtAGG	GGGAGT	AGACGCACTACCCAGCGCAGtAGGGGGAGTACCA	-	-1	-	-	43.59	C>T	exon
NM_004281.4:c.709C>T	BAG3	saCas9	saCas9_67	10:119672444-119672471	-	TCTGGTACTCCCCCTaCTGCG	CTGGGT	GGGTCTGGTACTCCCCCTaCTGCGCTGGGTAGTG	-	-3	-	-	38.05	C>T	exon
NM_004281.4:c.108G>A	BAG3	spCas9	spCas9_68	10:119651783-119651806	-	CTGTTGTGGTCCACGAAGAA	GGG	CGGCTGTTGTGGTCCACGAAGAAGGGtCAG	56.51	7	65.12	-	75.36	G>A	exon									0.219668
NM_004281.4:c.280_284dup	BAG3	spCas9	spCas9_70	10:119669940-119669963	-	ATGGGAATGTgaatgtAGCC	TGG	GGAATGGGAATGTgaatgtAGCCTGGTCGG	57.75	-2	57.64	-	57.35	A>ACATTC	exon									0.170808
NM_004281.4:c.514C>T	BAG3	spCas9	spCas9_72	10:119672258-119672281	-	GTCAGAGGCAGCTGGAGACT	aGG	GCAGTCAGAGGCAGCTGGAGACTaGGACCG	47.23	4	71	-	60.06	C>T	exon									0.218693
NM_004281.4:c.730C>T	BAG3	spCas9	spCas9_73	10:119672472-119672495	-	TCTTGTGGTACACAGGCTaG	TGG	GGATCTTGTGGTACACAGGCTaGTGGGTCT	49.32	2	49.61	-	44.9	C>T	exon									0.0594174
NM_004281.4:c.730C>T	BAG3	saCas9	saCas9_76	10:119672470-119672497	-	GATCTTGTGGTACACAGGCTa	GTGGGT	CTGGATCTTGTGGTACACAGGCTaGTGGGTCTGG	-	3	-	-	48.38	C>T	exon
NM_004281.4:c.358C>T	BAG3	spCas9	spCas9_77	10:119670018-119670041	-	GTTCGGAATCGCTaCATCCC	AGG	TCAGTTCGGAATCGCTaCATCCCAGGCTGG	61.3	-4	61.89	-	78.65	C>T	exon									0.219971
NM_004281.4:c.358C>T	BAG3	CasX	CasX_78	10:119670001-119670025	+	ATGTCTATCCCCAGCCTGGG	TTCC	ACCCTTTCCATGTCTATCCCCAGCCTGGGATGt	-	5	-	-	-	C>T	exon
NM_004281.4:c.358C>T	BAG3	Cas12a	Cas12a_79	10:119670000-119670025	+	CATGTCTATCCCCAGCCTGGG	TTTC	CACCCTTTCCATGTCTATCCCCAGCCTGGGATGt	-	7	-	64.61	-	C>T	exon
NM_004281.4:c.764G>A	BAG3	spCas9	spCas9_80	10:119672491-119672514	+	CAAGATCCAGGGGGATGACT	aGG	CCACAAGATCCAGGGGGATGACTaGGAGCC	50.87	4	57.01	-	55.26	G>A	exon									0.126197
NM_004281.4:c.925C>T	BAG3	spCas9	spCas9_82	10:119676474-119676497	-	AAACAGGTGCAGTTTCTCaA	TGG	GGGAAACAGGTGCAGTTTCTCaATGGGTCA	38.51	2	20.59	-	72.14	C>T	exon									-0.250702
NM_004281.4:c.925C>T	BAG3	saCas9	saCas9_86	10:119676472-119676499	-	GGAAACAGGTGCAGTTTCTCa	ATGGGT	CTGGGAAACAGGTGCAGTTTCTCaATGGGTCATG	-	3	-	-	66.86	C>T	exon
NM_004281.4:c.925C>T	BAG3	CasX	CasX_87	10:119676459-119676483	+	GCAGCCCATGACCCATtGAG	TTCA	CTTTTTTCAGCAGCCCATGACCCATtGAGAAAC	-	-3	-	-	-	C>T	exon
NM_004281.4:c.925C>T	BAG3	CasX	CasX_88	10:119676484-119676508	-	GGCTGGGAAACAGGTGCAGT	TTCA	TTGTTTTCAGGCTGGGAAACAGGTGCAGTTTCT	-	7	-	-	-	C>T	exon
NM_004281.4:c.925C>T	BAG3	Cas12a	Cas12a_89	10:119676458-119676483	+	AGCAGCCCATGACCCATtGAG	TTTC	CCTTTTTTCAGCAGCCCATGACCCATtGAGAAAC	-	-1	-	61.39	-	C>T	exon
NM_004281.4:c.72del	BAG3	spCas9	spCas9_90	10:119651726-119651749	+	TGACCGCGACCCTTTgCCCC	CGG	CGGTGACCGCGACCCTTTgCCCCCGGATGG	50.29	-2	53.44	-	76.72	GC>G	exon									0.0868933
NM_004281.4:c.72del	BAG3	spCas9	spCas9_93	10:119651741-119651764	-	GATCTTGATCTCCCATCCGG	GGG	GTCGATCTTGATCTCCCATCCGGGGGcAAA	69.32	7	61.19	-	75.84	GC>G	exon									0.261767
NM_004281.4:c.72del	BAG3	saCas9	saCas9_97	10:119651724-119651751	+	GGTGACCGCGACCCTTTgCCC	CCGGAT	AACGGTGACCGCGACCCTTTgCCCCCGGATGGGA	-	-1	-	-	69.26	GC>G	exon
NM_004281.4:c.72del	BAG3	saCas9	saCas9_98	10:119651733-119651760	-	TTGATCTCCCATCCGGGGGcA	AAGGGT	ATCTTGATCTCCCATCCGGGGGcAAAGGGTCGCG	-	2	-	-	78.14	GC>G	exon
NM_004281.4:c.1034_1038del	BAG3	spCas9	spCas9_99	10:119676566-119676589	+	CCAATTCAAGTGATCCGCAA	aGG	ATCCCAATTCAAGTGATCCGCAAaGGATTC	58.71	4	14.44	-	66.41	AGAGGT>A	exon									-0.181952
NM_004281.4:c.1034_1038del	BAG3	spCas9	spCas9_100	10:119676579-119676602	-	AACAGGTTTAGAATCCtTTG	CGG	GGAAACAGGTTTAGAATCCtTTGCGGATCA	46.77	-1	33.43	-	68.69	AGAGGT>A	exon									-0.0958633
NM_004281.4:c.1034_1038del	BAG3	saCas9	saCas9_101	10:119676564-119676591	+	TCCCAATTCAAGTGATCCGCA	AaGGAT	ACATCCCAATTCAAGTGATCCGCAAaGGATTCTA	-	5	-	-	70.07	AGAGGT>A	exon
NM_004281.4:c.1034_1038del	BAG3	saCas9	saCas9_102	10:119676577-119676604	-	GAAACAGGTTTAGAATCCtTT	GCGGAT	TGGGAAACAGGTTTAGAATCCtTTGCGGATCACT	-	1	-	-	66.28	AGAGGT>A	exon
NM_004281.4:c.1034_1038del	BAG3	CasX	CasX_103	10:119676570-119676594	+	AGTGATCCGCAAaGGATTCT	TTCA	CCCAATTCAAGTGATCCGCAAaGGATTCTAAAC	-	-7	-	-	-	AGAGGT>A	exon
NM_004281.4:c.1034_1038del	BAG3	CasX	CasX_104	10:119676586-119676610	-	GGGAAACAGGTTTAGAATCC	TTCT	GGGGCTTCTGGGAAACAGGTTTAGAATCCtTTG	-	2	-	-	-	AGAGGT>A	exon
NM_004281.4:c.974del	BAG3	spCas9	spCas9_105	10:119676508-119676531	+	AAACAAACCAGAAAGTAAgC	AGG	TGAAAACAAACCAGAAAGTAAgCAGGCCCA	63.19	2	43.88	-	70.91	GC>G	exon									0.0850914
NM_004281.4:c.974del	BAG3	spCas9	spCas9_106	10:119676514-119676537	-	AACTGGGCCTGcTTACTTTC	TGG	TCCAACTGGGCCTGcTTACTTTCTGGTTTG	20.32	-6	10.22	-	70.05	GC>G	exon									-0.441345
NM_004281.4:c.974del	BAG3	CasX	CasX_107	10:119676522-119676546	-	GGTCCAACTGGGCCTGcTTA	TTCT	GGGAGTTCTGGTCCAACTGGGCCTGcTTACTTT	-	-3	-	-	-	GC>G	exon
NM_004281.4:c.946C>T	BAG3	spCas9	spCas9_108	10:119676497-119676520	-	TTCTGGTTTGTTTTCAGGCT	aGG	ACTTTCTGGTTTGTTTTCAGGCTaGGAAAC	44.59	4	18.93	-	58.62	C>T	exon									-0.224841
NM_004281.4:c.946C>T	BAG3	CasX	CasX_110	10:119676496-119676520	-	GGTTTGTTTTCAGGCTaGGA	TTCT	TTACTTTCTGGTTTGTTTTCAGGCTaGGAAACA	-	-3	-	-	-	C>T	exon
NM_004281.4:c.946C>T	BAG3	Cas12a	Cas12a_111	10:119676496-119676521	-	TGGTTTGTTTTCAGGCTaGGA	TTTC	CTTACTTTCTGGTTTGTTTTCAGGCTaGGAAACA	-	-1	-	3.26	-	C>T	exon
NM_004281.4:c.29_35del	BAG3	spCas9	spCas9_112	10:119651683-119651706	+	CCGCCACCCACTCGCCCATG	aGG	GCGCCGCCACCCACTCGCCCATGaGGCGTC	50.93	4	43.59	-	68.77	ATGCAGGT>A	exon									0.0119655
NM_004281.4:c.29_35del	BAG3	spCas9	spCas9_114	10:119651697-119651720	-	CACCGTTGCCGGACGCCtCA	TGG	GGTCACCGTTGCCGGACGCCtCATGGGCGA	40.47	1	34.3	-	71.11	ATGCAGGT>A	exon									-0.126125
NM_004281.4:c.29_35del	BAG3	saCas9	saCas9_116	10:119651691-119651718	-	CCGTTGCCGGACGCCtCATGG	GCGAGT	TCACCGTTGCCGGACGCCtCATGGGCGAGTGGGT	-	-3	-	-	70.56	ATGCAGGT>A	exon
NM_004281.4:c.652del	BAG3	spCas9	spCas9_118	10:119672378-119672401	+	ATACACGAGCAGAACGTTaC	CGG	GTGATACACGAGCAGAACGTTaCCGGCCAG	56.29	2	70.24	-	53.06	AC>A	exon									0.267327
NM_004281.4:c.652del	BAG3	spCas9	spCas9_119	10:119672396-119672419	-	AGGAGGGCTGGGCTGCTGGC	CGG	GGAAGGAGGGCTGGGCTGCTGGCCGGtAAC	28.8	7	25.8	-	73.93	AC>A	exon									-0.264905
NM_004281.4:c.652del	BAG3	CasX	CasX_120	10:119672370-119672394	+	GGTGATACACGAGCAGAACG	TTCC	CTCCATTCCGGTGATACACGAGCAGAACGTTaC	-	4	-	-	-	AC>A	exon
NM_004281.4:c.765G>A	BAG3	spCas9	spCas9_121	10:119672499-119672522	+	AGGGGGATGACTGaGAGCCC	CGG	TCCAGGGGGATGACTGaGAGCCCCGGCCCC	48.23	-4	66.5	-	66.22	G>A	exon									0.185598
NM_004281.4:c.403C>T	BAG3	spCas9	spCas9_122	10:119670070-119670093	-	CATGCCCCGCAGAGGTGACT	aGG	TGGCATGCCCCGCAGAGGTGACTaGGACCT	57.8	4	65.53	-	67.32	C>T	exon									0.233005
NM_004281.4:c.403C>T	BAG3	CasX	CasX_124	10:119670075-119670099	-	GGCATGCCCCGCAGAGGTGA	TTCT	GTGGTTTCTGGCATGCCCCGCAGAGGTGACTaG	-	4	-	-	-	C>T	exon
NM_004281.4:c.403C>T	BAG3	Cas12a	Cas12a_125	10:119670075-119670100	-	TGGCATGCCCCGCAGAGGTGA	TTTC	AGTGGTTTCTGGCATGCCCCGCAGAGGTGACTaG	-	6	-	42.66	-	C>T	exon
NM_004281.4:c.262C>T	BAG3	spCas9	spCas9_126	10:119669929-119669952	-	AATGTAGCCTGGTCGGAGCT	aGG	GGGAATGTAGCCTGGTCGGAGCTaGGGGTA	41.49	4	54.99	-	65.15	C>T	exon									0.0519348
NM_004281.4:c.262C>T	BAG3	saCas9	saCas9_130	10:119669926-119669953	-	GAATGTAGCCTGGTCGGAGCT	aGGGGT	TGGGAATGTAGCCTGGTCGGAGCTaGGGGTACAC	-	4	-	-	66.7	C>T	exon
NM_004281.4:c.727dup	BAG3	spCas9	spCas9_132	10:119672466-119672489	-	TACACAGGCTGGTGGGTgtC	TGG	TGGTACACAGGCTGGTGGGTgtCTGGTACT	42.51	2	52.84	-	70.98	A>AC	exon									0.0384004
NM_004281.4:c.258C>G	BAG3	spCas9	spCas9_133	10:119669928-119669951	-	ATGTAGCCTGGTCGGAGCTG	GGG	GGAATGTAGCCTGGTCGGAGCTGGGGcTAC	53.05	7	57.56	-	74.95	C>G	exon									0.137417
NM_004281.4:c.258C>G	BAG3	saCas9	saCas9_137	10:119669917-119669944	-	CTGGTCGGAGCTGGGGcTACA	CAGGGT	AGCCTGGTCGGAGCTGGGGcTACACAGGGTGGCC	-	-2	-	-	68.87	C>G	exon
NM_004281.4:c.1031_1032del	BAG3	spCas9	spCas9_138	10:119676566-119676589	+	CCAATTCAAGTGATCCGcAG	AGG	ATCCCAATTCAAGTGATCCGcAGAGGTGGA	61.25	1	13.13	-	64.72	CAA>C	exon									-0.177429
NM_004281.4:c.1031_1032del	BAG3	spCas9	spCas9_140	10:119676579-119676602	-	AGGTTTAGAATCCACCTCTg	CGG	AACAGGTTTAGAATCCACCTCTgCGGATCA	55.93	3	48.93	-	66.92	CAA>C	exon									0.0855995
NM_004281.4:c.1031_1032del	BAG3	saCas9	saCas9_141	10:119676567-119676594	+	CAATTCAAGTGATCCGcAGAG	GTGGAT	TCCCAATTCAAGTGATCCGcAGAGGTGGATTCTA	-	-2	-	-	65.32	CAA>C	exon
NM_004281.4:c.1031_1032del	BAG3	saCas9	saCas9_142	10:119676577-119676604	-	ACAGGTTTAGAATCCACCTCT	gCGGAT	GAAACAGGTTTAGAATCCACCTCTgCGGATCACT	-	4	-	-	70.12	CAA>C	exon
NM_004281.4:c.1031_1032del	BAG3	Cas12a	Cas12a_144	10:119676574-119676599	-	GAATCCACCTCTgCGGATCAC	TTTA	ACAGGTTTAGAATCCACCTCTgCGGATCACTTGA	-	-6	-	71.25	-	CAA>C	exon
NM_004281.4:c.626C>T	BAG3	spCas9	spCas9_145	10:119672353-119672376	+	GCGGGGGTACATCTCCATTC	tGG	CCCGCGGGGGTACATCTCCATTCtGGTGAT	31.82	4	14.11	-	66.39	C>T	exon									-0.341245
NM_004281.4:c.626C>T	BAG3	spCas9	spCas9_146	10:119672366-119672389	-	CTGCTCGTGTATCACCaGAA	TGG	GTTCTGCTCGTGTATCACCaGAATGGAGAT	36.69	-1	25.62	-	65.55	C>T	exon									-0.217889
NM_004281.4:c.626C>T	BAG3	saCas9	saCas9_147	10:119672368-119672395	-	AACGTTCTGCTCGTGTATCAC	CaGAAT	GGTAACGTTCTGCTCGTGTATCACCaGAATGGAG	-	5	-	-	61.61	C>T	exon
NM_004281.4:c.626C>T	BAG3	CasX	CasX_148	10:119672367-119672391	-	GCTCGTGTATCACCaGAATG	TTCT	TAACGTTCTGCTCGTGTATCACCaGAATGGAGA	-	-5	-	-	-	C>T	exon
NM_004281.4:c.488del	BAG3	spCas9	spCas9_149	10:119670153-119670176	-	CTCAGGTCCGTGGGAGGCTG	GGG	TACCTCAGGTCCGTGGGAGGCTGGGGcTGG	43.16	7	62.2	-	66.07	GC>G	exon									0.120726
NM_004281.4:c.72dup	BAG3	spCas9	spCas9_152	10:119651729-119651752	+	CCGCGACCCTTTgcGCCCCC	CGG	TGACCGCGACCCTTTgcGCCCCCCGGATGG	42.56	-5	37.1	-	67.63	G>GC	exon									-0.0898469
NM_004281.4:c.72dup	BAG3	spCas9	spCas9_153	10:119651735-119651758	-	CTCCCATCCGGGGGGCgcAA	AGG	GATCTCCCATCCGGGGGGCgcAAAGGGTCG	41.84	1	20.52	-	74.05	G>GC	exon									-0.23247
NM_004281.4:c.72dup	BAG3	saCas9	saCas9_156	10:119651727-119651754	+	GACCGCGACCCTTTgcGCCCC	CCGGAT	GGTGACCGCGACCCTTTgcGCCCCCCGGATGGGA	-	-4	-	-	66.66	G>GC	exon
NM_004281.4:c.72dup	BAG3	saCas9	saCas9_157	10:119651733-119651760	-	ATCTCCCATCCGGGGGGCgcA	AAGGGT	TTGATCTCCCATCCGGGGGGCgcAAAGGGTCGCG	-	2	-	-	65.11	G>GC	exon
NM_004281.4:c.252_258dup	BAG3	spCas9	spCas9_158	10:119669919-119669942	-	CTGGGGGTACACAGGtacac	agg	GAGCTGGGGGTACACAGGtacacaggGTGG	66.25	6	63.07	-	73.4	C>CCTGTGTA	exon									0.260108
NM_004281.4:c.252_258dup	BAG3	saCas9	saCas9_161	10:119669917-119669944	-	AGCTGGGGGTACACAGGtaca	caggGT	CGGAGCTGGGGGTACACAGGtacacaggGTGGCC	-	7	-	-	71.91	C>CCTGTGTA	exon
NM_004281.4:c.751C>T	BAG3	spCas9	spCas9_162	10:119672479-119672502	+	GCCTGTGTACCACAAGATCt	AGG	CCAGCCTGTGTACCACAAGATCtAGGGGGA	43.82	3	51.04	-	45.85	C>T	exon									0.0388716
NM_004281.4:c.751C>T	BAG3	spCas9	spCas9_166	10:119672487-119672510	-	AGTCATCCCCCTaGATCTTG	TGG	CCCAGTCATCCCCCTaGATCTTGTGGTACA	51.79	-5	47.15	-	59.44	C>T	exon									0.0491201
NM_004281.4:c.751C>T	BAG3	saCas9	saCas9_167	10:119672480-119672507	+	CCTGTGTACCACAAGATCtAG	GGGGAT	CAGCCTGTGTACCACAAGATCtAGGGGGATGACT	-	1	-	-	52.08	C>T	exon
NM_004281.4:c.448C>T	BAG3	spCas9	spCas9_168	10:119670103-119670126	+	ACTCAGCCAGATAAAtAGTG	TGG	ACCACTCAGCCAGATAAAtAGTGTGGACAG	63.62	-2	60.67	-	75.42	C>T	exon									0.224423
NM_004281.4:c.448C>T	BAG3	spCas9	spCas9_170	10:119670108-119670131	-	ACCTGTCCACACTaTTTATC	TGG	GCCACCTGTCCACACTaTTTATCTGGCTGA	48.2	-4	21.13	-	78.42	C>T	exon									-0.191746
NM_004281.4:c.448C>T	BAG3	saCas9	saCas9_171	10:119670102-119670129	-	CTGTCCACACTaTTTATCTGG	CTGAGT	CACCTGTCCACACTaTTTATCTGGCTGAGTGGTT	-	-7	-	-	76.95	C>T	exon
NM_004281.4:c.147G>A	BAG3	spCas9	spCas9_172	10:119651811-119651834	-	GCGCGGGTCGTTtCACGTAG	TGG	CACGCGCGGGTCGTTtCACGTAGTGGTGCG	35.28	-5	28.72	-	68.42	G>A	exon									-0.201457
NM_001195305.3:c.109C>T	BBIP1	spCas9	spCas9_173	10:110901525-110901548	+	GTGATGTACATACCTTaCTT	TGG	TTTGTGATGTACATACCTTaCTTTGGAAGA	34	-1	26.61	-	64.85	C>T	exon									-0.225191
NM_001195305.3:c.109C>T	BBIP1	spCas9	spCas9_174	10:110901536-110901559	-	CGGGAAGTTCTTCCAAAGtA	AGG	TTCCGGGAAGTTCTTCCAAAGtAAGGTATG	50.35	2	35.94	-	62.71	C>T	exon									-0.0525337
NM_001195305.3:c.109C>T	BBIP1	CasX	CasX_175	10:110901538-110901562	-	GGGAAGTTCTTCCAAAGtAA	TTCC	CAATGTTCCGGGAAGTTCTTCCAAAGtAAGGTA	-	-2	-	-	-	C>T	exon
NM_001195305.3:c.109C>T	BBIP1	Cas12a	Cas12a_176	10:110901522-110901547	+	TGATGTACATACCTTaCTTTG	TTTG	CAATATTTGTGATGTACATACCTTaCTTTGGAAG	-	-3	-	72.1	-	C>T	exon
NM_001195305.3:c.173T>G	BBIP1	spCas9	spCas9_177	10:110900447-110900470	+	TTCCAGAGTCAGAGATTTTc	AGG	TTTTTCCAGAGTCAGAGATTTTcAGGGTAA	47.32	3	25.39	-	67.6	T>G	exon									-0.158507
NM_001195305.3:c.173T>G	BBIP1	saCas9	saCas9_179	10:110900445-110900472	+	TTTTCCAGAGTCAGAGATTTT	cAGGGT	AGTTTTTCCAGAGTCAGAGATTTTcAGGGTAAAA	-	4	-	-	61.23	T>G	exon
NM_001195305.3:c.173T>G	BBIP1	CasX	CasX_180	10:110900447-110900471	+	AGAGTCAGAGATTTTcAGGG	TTCC	AGTTTTTCCAGAGTCAGAGATTTTcAGGGTAAA	-	-4	-	-	-	T>G	exon
NM_001195305.3:c.173T>G	BBIP1	Cas12a	Cas12a_181	10:110900446-110900471	+	CAGAGTCAGAGATTTTcAGGG	TTTC	TAGTTTTTCCAGAGTCAGAGATTTTcAGGGTAAA	-	-2	-	34.8	-	T>G	exon
NM_001080512.3:c.1858+1G>T	BICC1	spCas9	spCas9_182	10:58800309-58800332	+	AATCAAGCCCCACTGAAGtT	CGG	CCAAATCAAGCCCCACTGAAGtTCGGGAAC	33.93	2	33.52	-	62.52	G>T	intron									-0.16801
NM_001080512.3:c.1858+1G>T	BICC1	spCas9	spCas9_184	10:58800317-58800340	-	GTACAGTTCCCGAaCTTCAG	TGG	AGGGTACAGTTCCCGAaCTTCAGTGGGGCT	54.63	-4	26.84	-	63.22	G>T	intron									-0.10267
NM_001080512.3:c.1858+1G>T	BICC1	CasX	CasX_187	10:58800325-58800349	-	GAAGGGTACAGTTCCCGAaC	TTCA	TGAATTTCAGAAGGGTACAGTTCCCGAaCTTCA	-	-1	-	-	-	G>T	intron
NM_001080512.3:c.1858+1G>T	BICC1	Cas12a	Cas12a_188	10:58800325-58800350	-	AGAAGGGTACAGTTCCCGAaC	TTTC	ATGAATTTCAGAAGGGTACAGTTCCCGAaCTTCA	-	2	-	62.95	-	G>T	intron
NM_001080512.3:c.93del	BICC1	spCas9	spCas9_189	10:58513217-58513240	+	ACTCCCCAGTGCCCGGCtCG	AGG	CCGACTCCCCAGTGCCCGGCtCGAGGACGA	45.7	1	42.37	-	63.46	TC>T	exon									-0.0269129
NM_001080512.3:c.93del	BICC1	spCas9	spCas9_190	10:58513228-58513251	-	CGACCAAGTCGTCCTCGaGC	CGG	CGGCGACCAAGTCGTCCTCGaGCCGGGCAC	53.37	1	43.2	-	56.07	TC>T	exon									0.0268344
NM_013314.4:c.1031del	BLNK	spCas9	spCas9_193	10:96200115-96200138	+	TCACAGGCTCCAGCATACCA	TGG	CGATCACAGGCTCCAGCATACCATGGcTGC	58.6	7	66.47	-	58.05	GA>G	exon									0.248226
NM_013314.4:c.1031del	BLNK	spCas9	spCas9_194	10:96200131-96200154	-	GCTGGCGTTCTCTGCAgCCA	TGG	GAAGCTGGCGTTCTCTGCAgCCATGGTATG	49.45	-1	55.98	-	68.72	GA>G	exon									0.105347
NM_013314.4:c.1031del	BLNK	CasX	CasX_195	10:96200110-96200134	+	ATCACAGGCTCCAGCATACC	TTCG	AGACTTTCGATCACAGGCTCCAGCATACCATGG	-	6	-	-	-	GA>G	exon
NM_013314.4:c.1031del	BLNK	CasX	CasX_196	10:96200140-96200164	-	CAGGAAGCTGGCGTTCTCTG	TTCA	TCCATTTCACAGGAAGCTGGCGTTCTCTGCAgC	-	4	-	-	-	GA>G	exon
NM_013314.4:c.1031del	BLNK	Cas12a	Cas12a_197	10:96200140-96200165	-	ACAGGAAGCTGGCGTTCTCTG	TTTC	CTCCATTTCACAGGAAGCTGGCGTTCTCTGCAgC	-	6	-	48.53	-	GA>G	exon
NM_013314.4:c.1195C>T	BLNK	spCas9	spCas9_198	10:96196948-96196971	+	GTTGCTTCAATAAATCaCAC	AGG	TTTGTTGCTTCAATAAATCaCACAGGAATA	61.91	-1	36.12	-	68.46	C>T	intron									0.0145103
NM_013314.4:c.1195C>T	BLNK	saCas9	saCas9_199	10:96196947-96196974	+	TGTTGCTTCAATAAATCaCAC	AGGAAT	TTTTGTTGCTTCAATAAATCaCACAGGAATATTA	-	-1	-	-	75.92	C>T	intron
NM_013314.4:c.1195C>T	BLNK	Cas12a	Cas12a_200	10:96196945-96196970	+	TTGCTTCAATAAATCaCACAG	TTTG	ATTGTTTTGTTGCTTCAATAAATCaCACAGGAAT	-	-3	-	33.36	-	C>T	intron
NM_013314.3:c.114delG	BLNK	spCas9	spCas9_201	10:96242765-96242788	+	GAGGTGCTTTGACTTTTAgC	TGG	TTGGAGGTGCTTTGACTTTTAgCTGGAAAT	46.16	2	19.55	-	77.51	CG>C	exon									-0.216353
NM_013314.3:c.114delG	BLNK	Cas12a	Cas12a_202	10:96242783-96242808	-	TCTCATGGTTGTTATTTCCAG	TTTG	GACCTTTTGTCTCATGGTTGTTATTTCCAGcTAA	-	4	-	17.15	-	CG>C	exon
NM_013314.4:c.26del	BLNK	spCas9	spCas9_203	10:96271349-96271372	+	TACCTCAACTTCTGACTGGC	GGG	TCTTACCTCAACTTCTGACTGGCGGGgCGG	57.91	7	48.86	-	63.52	CT>C	exon									0.0975893
NM_004329.3:c.68-1G>A	BMPR1A	spCas9	spCas9_206	10:86890051-86890074	+	TTTGAATGCAaGACAGAATC	TGG	ATATTTGAATGCAaGACAGAATCTGGATAG	57.69	-7	60.56	-	66.41	G>A	5utr									0.191733
NM_004329.3:c.68-1G>A	BMPR1A	saCas9	saCas9_207	10:86890043-86890070	+	ATTCCATATTTGAATGCAaGA	CAGAAT	CAAATTCCATATTTGAATGCAaGACAGAATCTGG	-	1	-	-	63.85	G>A	5utr
NM_004329.3:c.68-1G>A	BMPR1A	CasX	CasX_209	10:86890044-86890068	+	ATATTTGAATGCAaGACAGA	TTCC	ACAAATTCCATATTTGAATGCAaGACAGAATCT	-	-6	-	-	-	G>A	5utr
NM_004329.3:c.15C>A	BMPR1A	spCas9	spCas9_210	10:86876021-86876044	-	CTGATGTAAATtTATAGCTG	AGG	AATCTGATGTAAATtTATAGCTGAGGCATT	53.47	-6	20.14	-	66.65	C>A	5utr									-0.16562
NM_004329.3:c.97dup	BMPR1A	spCas9	spCas9_211	10:86890067-86890090	+	AATCTGGATAGTATGCTTCA	TGG	CAGAATCTGGATAGTATGCTTCATGGcaCA	44.1	7	34.19	-	52.64	C>CA	exon									-0.100264
NM_004329.3:c.97dup	BMPR1A	saCas9	saCas9_214	10:86890074-86890101	+	ATAGTATGCTTCATGGcaCAC	TGGGAT	TGGATAGTATGCTTCATGGcaCACTGGGATGAAA	-	-2	-	-	59.25	C>CA	exon
NM_004329.3:c.910C>T	BMPR1A	spCas9	spCas9_215	10:86919204-86919227	-	AATCAAATAGAGCTaAGTCC	AGG	AGTAATCAAATAGAGCTaAGTCCAGGAACC	63.77	-3	61.61	-	64.28	C>T	exon									0.236429
NM_004329.3:c.910C>T	BMPR1A	CasX	CasX_216	10:86919218-86919242	-	TGGTAATCAGTAATCAAATA	TTCA	CCATTTTCATGGTAATCAGTAATCAAATAGAGC	-	7	-	-	-	C>T	exon
NM_004329.3:c.1245_1246dup	BMPR1A	Cas12a	Cas12a_217	10:86921588-86921613	-	TTCAGGCTTTCttcGTCCAGC	TTTG	TGGTTTTTGTTCAGGCTTTCttcGTCCAGCACTT	-	-5	-	5.07	-	G>GAA	exon
NM_004329.3:c.338del	BMPR1A	Cas12a	Cas12a_218	10:86899772-86899797	+	TCATTACTCTTCTTTTAGGAT	TTTA	CTAATTTTATCATTACTCTTCTTTTAGGATtTCC	-	4	-	1.28	-	TC>T	exon
NM_004329.3:c.189C>A	BMPR1A	spCas9	spCas9_219	10:86890166-86890189	+	TTTTTAAAGTGCTATTGaTC	AGG	CCTTTTTTAAAGTGCTATTGaTCAGGGCAC	50.1	1	10.31	-	69.06	C>A	exon									-0.266891
NM_004329.3:c.189C>A	BMPR1A	Cas12a	Cas12a_221	10:86890168-86890193	+	AAGTGCTATTGaTCAGGGCAC	TTTA	CCTTTTTTAAAGTGCTATTGaTCAGGGCACTGTC	-	-7	-	19.73	-	C>A	exon
NM_004329.3:c.510del	BMPR1A	CasX	CasX_222	10:86900108-86900132	-	TACTTGTAACAAAAGCAGCT	TTCT	ATATCTTCTTACTTGTAACAAAAGCAGCTGGAa	-	5	-	-	-	TC>T	exon
NM_004329.3:c.497del	BMPR1A	CasX	CasX_223	10:86900070-86900094	+	ATGGCTGTCTGCATAATTgT	TTCT	CTCATTTCTATGGCTGTCTGCATAATTgTATGA	-	-1	-	-	-	GC>G	exon
NM_004329.3:c.497del	BMPR1A	Cas12a	Cas12a_224	10:86900069-86900094	+	TATGGCTGTCTGCATAATTgT	TTTC	GCTCATTTCTATGGCTGTCTGCATAATTgTATGA	-	2	-	41.72	-	GC>G	exon
NM_004329.3:c.1065del	BMPR1A	spCas9	spCas9_225	10:86919367-86919390	-	AGGTCTCGATGAGCAATTGC	GGG	TTTAGGTCTCGATGAGCAATTGCGGGtTTC	65.46	7	68.59	-	74.68	AG>A	exon									0.300554
NM_004329.3:c.1065del	BMPR1A	saCas9	saCas9_228	10:86919356-86919383	-	GATGAGCAATTGCGGGtTTCC	TTGGGT	CTCGATGAGCAATTGCGGGtTTCCTTGGGTGCCA	-	-2	-	-	69.38	AG>A	exon
NM_004329.3:c.1065del	BMPR1A	Cas12a	Cas12a_229	10:86919349-86919374	+	TGGCACCCAAGGAAaCCCGCA	TTTA	AGAAATTTATGGCACCCAAGGAAaCCCGCAATTG	-	-4	-	54.33	-	AG>A	exon
NM_004329.3:c.1065del	BMPR1A	Cas12a	Cas12a_230	10:86919368-86919393	-	GGTCTCGATGAGCAATTGCGG	TTTA	TGCTCTTTAGGTCTCGATGAGCAATTGCGGGtTT	-	5	-	47.51	-	AG>A	exon
NM_004329.3:c.731dup	BMPR1A	spCas9	spCas9_231	10:86917175-86917198	+	AGTTGGTAAAGGCcgCGATA	TGG	GCAAGTTGGTAAAGGCcgCGATATGGAGAA	35.48	-4	19.42	-	66.18	C>CG	exon									-0.27616
NM_004329.3:c.731dup	BMPR1A	spCas9	spCas9_232	10:86917186-86917209	-	ATCCATACTTCTCCATATCG	cgG	CCCATCCATACTTCTCCATATCGcgGCCTT	53.28	5	64.45	-	67.16	C>CG	exon									0.197844
NM_004329.3:c.731dup	BMPR1A	CasX	CasX_233	10:86917159-86917183	+	GATGGTCCGGCAAGTTGGTA	TTCA	ACAGATTCAGATGGTCCGGCAAGTTGGTAAAGG	-	7	-	-	-	C>CG	exon
NM_004329.3:c.731dup	BMPR1A	Cas12a	Cas12a_234	10:86917191-86917216	-	CCCATCCATACTTCTCCATAT	TTTG	CGCCATTTGCCCATCCATACTTCTCCATATCGcg	-	7	-	85.16	-	C>CG	exon
NM_004329.3:c.357_360del	BMPR1A	spCas9	spCas9_235	10:86899807-86899830	-	CAACATTCTATTGTCgTAGC	TGG	CGACAACATTCTATTGTCgTAGCTGGGCTT	45.57	-2	14.35	-	68.92	CGCCG>C	exon									-0.259973
NM_004329.3:c.357_360del	BMPR1A	saCas9	saCas9_237	10:86899800-86899827	+	CCAAAAGCCCAGCTAcGACAA	TAGAAT	TCTCCAAAAGCCCAGCTAcGACAATAGAATGTTG	-	-3	-	-	71.52	CGCCG>C	exon
NM_004329.3:c.357_360del	BMPR1A	CasX	CasX_238	10:86899796-86899820	+	CCAAAAGCCCAGCTAcGACA	TTCT	TAGGATTCTCCAAAAGCCCAGCTAcGACAATAG	-	-4	-	-	-	CGCCG>C	exon
NM_004329.3:c.357_360del	BMPR1A	Cas12a	Cas12a_239	10:86899789-86899814	+	GGATTCTCCAAAAGCCCAGCT	TTTA	CTTCTTTTAGGATTCTCCAAAAGCCCAGCTAcGA	-	5	-	53.42	-	CGCCG>C	exon
NM_004329.3:c.567C>A	BMPR1A	CasX	CasX_240	10:86912276-86912300	-	TCCTGTTCCAAATCACGATT	TTCA	AATGCTTCATCCTGTTCCAAATCACGATTtTAA	-	2	-	-	-	C>A	exon
NM_004329.3:c.566dup	BMPR1A	CasX	CasX_241	10:86912278-86912302	-	TCCTGTTCCAAATCACGATT	TTCA	AATGCTTCATCCTGTTCCAAATCACGATTGTAt	-	6	-	-	-	T>TA	exon
NM_004329.3:c.44_47del	BMPR1A	spCas9	spCas9_243	10:86876055-86876078	-	GAACACGAGAAATGATGAAt	AGG	CTTGAACACGAGAAATGATGAAtAGGCTCC	47.85	3	48.85	-	72.79	ATTTG>A	5utr									0.0361014
NM_004329.3:c.44_47del	BMPR1A	Cas12a	Cas12a_244	10:86876035-86876060	+	CATCAGATTATTGGGAGCCTa	TTTA	ATACATTTACATCAGATTATTGGGAGCCTaTTCA	-	3	-	41.29	-	ATTTG>A	5utr
NM_004329.3:c.44_47del	BMPR1A	Cas12a	Cas12a_245	10:86876061-86876086	-	CCTTGAACACGAGAAATGATG	TTTA	ACTGATTTACCTTGAACACGAGAAATGATGAAtA	-	6	-	45.33	-	ATTTG>A	5utr
NM_004329.3:c.40dup	BMPR1A	spCas9	spCas9_246	10:86876055-86876078	-	GAGAAATGATGAACAAATAG	agG	CACGAGAAATGATGAACAAATAGagGCTCC	65.34	5	55.33	-	72.72	C>CT	5utr									0.191307
NM_004329.3:c.40dup	BMPR1A	Cas12a	Cas12a_247	10:86876035-86876060	+	CATCAGATTATTGGGAGCctC	TTTA	ATACATTTACATCAGATTATTGGGAGCctCTATT	-	1	-	40.15	-	C>CT	5utr
NM_004329.3:c.987_992delinsTGTA	BMPR1A	spCas9	spCas9_248	10:86919285-86919308	-	TAAGCCAATTTAAGCtacaC	TGG	GAATAAGCCAATTTAAGCtacaCTGGTGTC	58.49	2	21.78	-	75.84	AGCCCT>TGTA	exon									-0.12569
NM_004329.3:c.987_992delinsTGTA	BMPR1A	CasX	CasX_249	10:86919261-86919285	+	TGAAATGTGCTACACTGGAC	TTCC	ATGACTTCCTGAAATGTGCTACACTGGACACCA	-	7	-	-	-	AGCCCT>TGTA	exon
NM_004329.3:c.924del	BMPR1A	saCas9	saCas9_250	10:86919209-86919236	-	GGTAATCAGTAtCAAATAGAG	CTGAGT	CATGGTAATCAGTAtCAAATAGAGCTGAGTCCAG	-	-7	-	-	54.95	AT>A	exon
NM_004329.3:c.924del	BMPR1A	CasX	CasX_251	10:86919203-86919227	+	TGGACTCAGCTCTATTTGaT	TTCC	ACAGGTTCCTGGACTCAGCTCTATTTGaTACTG	-	-1	-	-	-	AT>A	exon
NM_004329.3:c.924del	BMPR1A	CasX	CasX_252	10:86919217-86919241	-	TGGTAATCAGTAtCAAATAG	TTCA	CCATTTTCATGGTAATCAGTAtCAAATAGAGCT	-	-7	-	-	-	AT>A	exon
NM_004329.3:c.924del	BMPR1A	Cas12a	Cas12a_253	10:86919217-86919242	-	ATGGTAATCAGTAtCAAATAG	TTTC	TCCATTTTCATGGTAATCAGTAtCAAATAGAGCT	-	-5	-	41.03	-	AT>A	exon
NM_004329.3:c.813G>A	BMPR1A	spCas9	spCas9_254	10:86917263-86917286	-	TTCTGTTTCTCGAAAtCAGC	TGG	GATTTCTGTTTCTCGAAAtCAGCTGGCTTC	53.85	-2	47.68	-	63.05	G>A	exon									0.064378
NM_004329.3:c.813G>A	BMPR1A	CasX	CasX_255	10:86917245-86917269	+	TTACCACTGAAGAAGCCAGC	TTCT	AAGTATTCTTTACCACTGAAGAAGCCAGCTGaT	-	4	-	-	-	G>A	exon
NM_004329.3:c.813G>A	BMPR1A	Cas12a	Cas12a_256	10:86917248-86917273	+	CCACTGAAGAAGCCAGCTGaT	TTTA	TATTCTTTACCACTGAAGAAGCCAGCTGaTTTCG	-	2	-	63.44	-	G>A	exon
NM_004329.3:c.813G>A	BMPR1A	Cas12a	Cas12a_257	10:86917271-86917296	-	GTAGATTTCTGTTTCTCGAAA	TTTG	CACAGTTTGGTAGATTTCTGTTTCTCGAAAtCAG	-	4	-	26.29	-	G>A	exon
NM_004329.3:c.275del	BMPR1A	spCas9	spCas9_259	10:86892148-86892171	+	CATCATAGAAGAAGATGACC	aGG	TGCCATCATAGAAGAAGATGACCaGGAGAA	71.57	4	70.36	-	61.25	AG>A	exon									0.354796
NM_004329.3:c.275del	BMPR1A	spCas9	spCas9_260	10:86892165-86892188	-	GAAGCTAATGTGGTTTCTCC	tGG	CCTGAAGCTAATGTGGTTTCTCCtGGTCAT	55.83	4	57.15	-	64.42	AG>A	exon									0.15344
NM_004329.3:c.275del	BMPR1A	Cas12a	Cas12a_261	10:86892143-86892168	+	CCATCATAGAAGAAGATGACC	TTTG	ATTGCTTTGCCATCATAGAAGAAGATGACCaGGA	-	4	-	75.9	-	AG>A	exon
NM_004329.3:c.1057C>T	BMPR1A	spCas9	spCas9_262	10:86919342-86919365	+	ACAGAAATTTATGGCACCtA	AGG	CACACAGAAATTTATGGCACCtAAGGAAAG	53.31	2	11.51	-	69.82	C>T	exon									-0.238553
NM_004329.3:c.1057C>T	BMPR1A	spCas9	spCas9_263	10:86919357-86919380	-	AGCAATTGCGGGCTTTCCTT	aGG	ATGAGCAATTGCGGGCTTTCCTTaGGTGCC	34.75	4	14.55	-	75.65	C>T	exon									-0.323384
NM_004329.3:c.1461G>A	BMPR1A	CasX	CasX_264	10:86923492-86923516	-	ACTCACTTCATCACTGTTtC	TTCC	CTGAGTTCCACTCACTTCATCACTGTTtCACCG	-	-1	-	-	-	G>A	exon
NM_004329.3:c.1461G>A	BMPR1A	Cas12a	Cas12a_265	10:86923467-86923492	+	CGGCCAATTGTGTCTAATCGG	TTTG	AAACGTTTGCGGCCAATTGTGTCTAATCGGTGaA	-	6	-	55.13	-	G>A	exon
NM_004329.3:c.1267del	BMPR1A	spCas9	spCas9_266	10:86921612-86921635	-	GCCATGATGTAGGGCTGaAG	TGG	TCAGCCATGATGTAGGGCTGaAGTGGTTTT	57.2	1	54.24	-	91.97	TC>T	exon									0.129068
NM_004329.3:c.133_134del	BMPR1A	spCas9	spCas9_267	10:86890110-86890133	+	CCGACCAGAAAAAGTcAAAA	TGG	ACTCCGACCAGAAAAAGTcAAAATGGAGTA	35.11	-2	17.26	-	60.45	CAG>C	exon									-0.294348
NM_004329.3:c.133_134del	BMPR1A	spCas9	spCas9_268	10:86890113-86890136	-	TACTCCATTTTgACTTTTTC	TGG	GGTTACTCCATTTTgACTTTTTCTGGTCGG	31.38	-6	8.56	-	69.82	CAG>C	exon									-0.390536
NM_004329.3:c.133_134del	BMPR1A	saCas9	saCas9_269	10:86890109-86890136	+	TCCGACCAGAAAAAGTcAAAA	TGGAGT	GACTCCGACCAGAAAAAGTcAAAATGGAGTAACC	-	-2	-	-	62.18	CAG>C	exon
NM_004329.3:c.1314G>A	BMPR1A	spCas9	spCas9_270	10:86921652-86921675	+	CGGCCTAATCATTTGaGAGA	TGG	CTTCGGCCTAATCATTTGaGAGATGGCTCG	44.96	-2	12.77	-	69.03	G>A	exon									-0.276564
NM_004329.3:c.1314G>A	BMPR1A	spCas9	spCas9_271	10:86921654-86921677	-	GAGCCATCTCtCAAATGATT	AGG	GACGAGCCATCTCtCAAATGATTAGGCCGA	46.33	-7	18.06	-	69.53	G>A	exon									-0.225195
NM_004329.3:c.1314G>A	BMPR1A	CasX	CasX_272	10:86921650-86921674	+	GCCTAATCATTTGaGAGATG	TTCG	ACAGCTTCGGCCTAATCATTTGaGAGATGGCTC	-	-6	-	-	-	G>A	exon
NM_004329.3:c.1255A>T	BMPR1A	spCas9	spCas9_273	10:86921600-86921623	-	GCTGGAAGTGGTTTTaGTTC	AGG	AGGGCTGGAAGTGGTTTTaGTTCAGGCTTT	36.98	-2	41.86	-	41.78	A>T	exon									-0.0752805
NM_004329.3:c.1193dup	BMPR1A	spCas9	spCas9_274	10:86921542-86921565	-	TGCCCACCCTGGTATTCAAG	agG	TGGTGCCCACCCTGGTATTCAAGagGGCAC	66.09	5	69.67	-	63.62	C>CT	exon									0.316483
NM_004329.3:c.1193dup	BMPR1A	saCas9	saCas9_276	10:86921526-86921553	+	AAATGAAGTTGATGTGCCctC	TTGAAT	CACAAATGAAGTTGATGTGCCctCTTGAATACCA	-	1	-	-	58.61	C>CT	exon
NM_004329.3:c.1193dup	BMPR1A	CasX	CasX_277	10:86921515-86921539	+	GTGACACAAATGAAGTTGAT	TTCA	TTTGTTTCAGTGACACAAATGAAGTTGATGTGC	-	7	-	-	-	C>CT	exon
NM_004329.3:c.1193dup	BMPR1A	Cas12a	Cas12a_278	10:86921545-86921570	-	GTGCCCACCCTGGTATTCAAG	TTTG	TAGCGTTTGGTGCCCACCCTGGTATTCAAGagGG	-	5	-	59.36	-	C>CT	exon
NM_004329.3:c.366_384del	BMPR1A	spCas9	spCas9_279	10:86899798-86899821	+	CTCCAAAAGCCCAGCTACGC	CGG	ATTCTCCAAAAGCCCAGCTACGCCGGaCAA	47.87	7	47.8	-	80.55	ACAATAGAATGTTGTCGGAC>A	exon									0.02521
NM_004329.3:c.366_384del	BMPR1A	spCas9	spCas9_280	10:86899816-86899839	-	TACTGGTTACATAAATTGtC	CGG	AAATACTGGTTACATAAATTGtCCGGCGTA	51.27	2	39.36	-	67.81	ACAATAGAATGTTGTCGGAC>A	exon									-0.0205801
NM_004329.3:c.366_384del	BMPR1A	CasX	CasX_281	10:86899796-86899820	+	CCAAAAGCCCAGCTACGCCG	TTCT	TAGGATTCTCCAAAAGCCCAGCTACGCCGGaCA	-	3	-	-	-	ACAATAGAATGTTGTCGGAC>A	exon
NM_004329.3:c.864dup	BMPR1A	spCas9	spCas9_282	10:86917307-86917330	+	GCGCCATGAAAACAtaTACT	TGG	AATGCGCCATGAAAACAtaTACTTGGTGGG	36.7	-3	35.53	-	71.86	T>TA	exon									-0.138182
NM_004329.3:c.864dup	BMPR1A	spCas9	spCas9_285	10:86917309-86917332	-	CCACCAAGTAtaTGTTTTCA	TGG	TACCCACCAAGTAtaTGTTTTCATGGCGCA	42.75	-6	9.32	-	67.01	T>TA	exon									-0.317215
NM_004329.3:c.864dup	BMPR1A	saCas9	saCas9_286	10:86917308-86917335	+	CGCCATGAAAACAtaTACTTG	GTGGGT	ATGCGCCATGAAAACAtaTACTTGGTGGGTACAC	-	-5	-	-	67.97	T>TA	exon
NM_004329.3:c.1372dup	BMPR1A	spCas9	spCas9_287	10:86923398-86923421	-	CGGTACCATGTTGTAATatA	TGG	ACTCGGTACCATGTTGTAATatATGGCAAT	37.38	2	31.94	-	61.27	A>AT	exon									-0.160545
NM_004329.3:c.1183del	BMPR1A	saCas9	saCas9_289	10:86921523-86921550	+	CACAAATGAAGTtATGTGCCC	TTGAAT	TGACACAAATGAAGTtATGTGCCCTTGAATACCA	-	-6	-	-	81.99	TG>T	exon
NM_004329.3:c.1183del	BMPR1A	CasX	CasX_290	10:86921506-86921530	+	TTTGTTTCAGTGACACAAAT	TTCT	TGGCTTTCTTTTGTTTCAGTGACACAAATGAAG	-	7	-	-	-	TG>T	exon
NM_004329.3:c.1183del	BMPR1A	Cas12a	Cas12a_292	10:86921510-86921535	+	TTTCAGTGACACAAATGAAGT	TTTG	TTTCTTTTGTTTCAGTGACACAAATGAAGTtATG	-	4	-	16.28	-	TG>T	exon
NM_004329.3:c.419del	BMPR1A	spCas9	spCas9_294	10:86899874-86899897	-	TAACCTACCTATGACAACAG	GGG	GGCTAACCTACCTATGACAACAGGGGcAGT	64.51	7	59.23	-	74.06	GC>G	exon									0.218167
NM_004329.3:c.419del	BMPR1A	saCas9	saCas9_297	10:86899864-86899891	-	ACCTATGACAACAGGGGcAGT	GTGGGT	CCTACCTATGACAACAGGGGcAGTGTGGGTTGCA	-	-1	-	-	53.19	GC>G	exon
NM_004329.3:c.419del	BMPR1A	Cas12a	Cas12a_298	10:86899859-86899884	+	CAACCCACACTgCCCCTGTTG	TTTG	CAGTATTTGCAACCCACACTgCCCCTGTTGTCAT	-	-7	-	72.14	-	GC>G	exon
NM_004329.3:c.676-1G>A	BMPR1A	Cas12a	Cas12a_299	10:86917115-86917140	+	CTTTTTTCTATAAAaGTTCAG	TTTA	AACCTTTTACTTTTTTCTATAAAaGTTCAGCGAA	-	-4	-	1.23	-	G>A	exon
NM_004329.3:c.676-1G>A	BMPR1A	Cas12a	Cas12a_300	10:86917129-86917154	-	GCAATAGTTCGCTGAACtTTT	TTTG	ATCTGTTTGGCAATAGTTCGCTGAACtTTTATAG	-	-1	-	67.05	-	G>A	exon
NM_004329.3:c.150del	BMPR1A	spCas9	spCas9_301	10:86890131-86890154	+	ATGGAGTAACCTtGCACCAG	AGG	AAAATGGAGTAACCTtGCACCAGAGGATAC	65.38	-5	34.9	-	79.7	TA>T	exon									0.0212486
NM_004329.3:c.150del	BMPR1A	spCas9	spCas9_302	10:86890139-86890162	-	GCAAGGTATCCTCTGGTGCa	AGG	AAGGCAAGGTATCCTCTGGTGCaAGGTTAC	59.54	3	43.24	-	72.05	TA>T	exon									0.0582217
NM_004329.3:c.150del	BMPR1A	saCas9	saCas9_303	10:86890129-86890156	+	AAATGGAGTAACCTtGCACCA	GAGGAT	AGAAAATGGAGTAACCTtGCACCAGAGGATACCT	-	-4	-	-	76.81	TA>T	exon
NM_004329.3:c.244del	BMPR1A	CasX	CasX_304	10:86892116-86892140	+	GTTTTAGAACTAATGGACaT	TTCT	TTTTTTTCTGTTTTAGAACTAATGGACaTGCTT	-	-1	-	-	-	AT>A	exon
NM_004329.3:c.244del	BMPR1A	CasX	CasX_305	10:86892135-86892159	-	TCTATGATGGCAAAGCAtGT	TTCT	TCATCTTCTTCTATGATGGCAAAGCAtGTCCAT	-	-2	-	-	-	AT>A	exon
NM_004329.3:c.244del	BMPR1A	Cas12a	Cas12a_307	10:86892115-86892140	+	TGTTTTAGAACTAATGGACaT	TTTC	GTTTTTTTCTGTTTTAGAACTAATGGACaTGCTT	-	2	-	1.91	-	AT>A	exon
NM_004329.3:c.847dup	BMPR1A	spCas9	spCas9_309	10:86917291-86917314	-	TGGCGCATTAtaGCACAGTT	TGG	TCATGGCGCATTAtaGCACAGTTTGGTAGA	37.03	-6	38.99	-	71.9	T>TA	exon									-0.107793
NM_004329.3:c.847dup	BMPR1A	Cas12a	Cas12a_310	10:86917294-86917319	-	ATGGCGCATTAtaGCACAGTT	TTTC	TATGTTTTCATGGCGCATTAtaGCACAGTTTGGT	-	-6	-	22.97	-	T>TA	exon
NM_004329.3:c.674del	BMPR1A	spCas9	spCas9_311	10:86912362-86912385	+	GTGGGTCTGGACTACCTTTa	TGG	GTAGTGGGTCTGGACTACCTTTaTGGTAAG	24.61	3	10.93	-	64.25	AT>A	exon									-0.408752
NM_004329.3:c.674del	BMPR1A	spCas9	spCas9_312	10:86912375-86912398	-	GAACGTTTAACTTACCAtAA	AGG	TAGGAACGTTTAACTTACCAtAAAGGTAGT	20.59	1	12.87	-	60.79	AT>A	exon									-0.415138
NM_004329.3:c.674del	BMPR1A	CasX	CasX_313	10:86912354-86912378	+	GGTAGTGGGTCTGGACTACC	TTCT	CAAAGTTCTGGTAGTGGGTCTGGACTACCTTTa	-	5	-	-	-	AT>A	exon
NM_004329.3:c.1119dup	BMPR1A	spCas9	spCas9_314	10:86919404-86919427	+	CATCCTCATCAAGAAAAatA	TGG	AAACATCCTCATCAAGAAAAatATGGGAGT	37.32	1	25.6	-	66.22	A>AT	exon									-0.214589
NM_004329.3:c.1119dup	BMPR1A	saCas9	saCas9_316	10:86919404-86919431	+	CATCCTCATCAAGAAAAatAT	GGGAGT	AAACATCCTCATCAAGAAAAatATGGGAGTTGCT	-	-1	-	-	66.42	A>AT	exon
NM_004329.3:c.813del	BMPR1A	spCas9	spCas9_317	10:86917263-86917286	-	TTTCTGTTTCTCGAAACaGC	TGG	AGATTTCTGTTTCTCGAAACaGCTGGCTTC	50.55	1	21.62	-	71.44	TG>T	exon									-0.171901
NM_004329.3:c.813del	BMPR1A	CasX	CasX_318	10:86917245-86917269	+	TTACCACTGAAGAAGCCAGC	TTCT	AAGTATTCTTTACCACTGAAGAAGCCAGCtGTT	-	2	-	-	-	TG>T	exon
NM_004329.3:c.813del	BMPR1A	CasX	CasX_319	10:86917261-86917285	-	GTTTCTCGAAACaGCTGGCT	TTCT	TAGATTTCTGTTTCTCGAAACaGCTGGCTTCTT	-	-7	-	-	-	TG>T	exon
NM_004329.3:c.813del	BMPR1A	Cas12a	Cas12a_320	10:86917248-86917273	+	CCACTGAAGAAGCCAGCtGTT	TTTA	TATTCTTTACCACTGAAGAAGCCAGCtGTTTCGA	-	-1	-	62.85	-	TG>T	exon
NM_004329.3:c.813del	BMPR1A	Cas12a	Cas12a_321	10:86917270-86917295	-	GTAGATTTCTGTTTCTCGAAA	TTTG	CACAGTTTGGTAGATTTCTGTTTCTCGAAACaGC	-	5	-	25.63	-	TG>T	exon
NM_004329.3:c.441del	BMPR1A	spCas9	spCas9_323	10:86900019-86900042	+	ATTGTCAGGTCCgTTTTTGA	TGG	TTTATTGTCAGGTCCgTTTTTGATGGCAGC	43.77	-5	20.74	-	60.56	GT>G	exon									-0.215309
NM_004329.3:c.441del	BMPR1A	spCas9	spCas9_324	10:86900028-86900051	-	TCGAATGCTGCCATCAAAAA	cGG	CCATCGAATGCTGCCATCAAAAAcGGACCT	44.34	4	18.48	-	68.71	GT>G	exon									-0.233076
NM_004329.3:c.441del	BMPR1A	Cas12a	Cas12a_325	10:86900010-86900035	+	CTTTTATTGTCAGGTCCgTTT	TTTA	CATTGTTTACTTTTATTGTCAGGTCCgTTTTTGA	-	-1	-	1.81	-	GT>G	exon
NM_004329.3:c.1374C>A	BMPR1A	spCas9	spCas9_327	10:86923392-86923415	+	CCAATTGCCATATTAaAACA	TGG	ATACCAATTGCCATATTAaAACATGGTACC	57.97	-2	45.04	-	62.02	C>A	exon									0.0669526
NM_004329.3:c.1374C>A	BMPR1A	spCas9	spCas9_328	10:86923398-86923421	-	CTCGGTACCATGTTtTAATA	TGG	TCACTCGGTACCATGTTtTAATATGGCAAT	34.97	-3	15.78	-	56.76	C>A	exon									-0.306221
NM_004329.3:c.1374C>A	BMPR1A	saCas9	saCas9_329	10:86923396-86923423	+	TTGCCATATTAaAACATGGTA	CCGAGT	CAATTGCCATATTAaAACATGGTACCGAGTGATC	-	-7	-	-	61.17	C>A	exon
NM_004329.3:c.199_203dup	BMPR1A	Cas12a	Cas12a_330	10:86890168-86890193	+	AAGTGCTATTGCTCAGGGCac	TTTA	CCTTTTTTAAAGTGCTATTGCTCAGGGCactgtc	-	2	-	17.24	-	A>ACTGTC	exon
NM_004329.3:c.156_165del	BMPR1A	spCas9	spCas9_331	10:86890139-86890162	-	TTAAAAAAGGCAAGGTgCTA	AGG	ACTTTAAAAAAGGCAAGGTgCTAAGGTTAC	56.2	-1	8.23	-	72.01	CACCAGAGGAT>C	exon									-0.24939
NM_004329.3:c.156_165del	BMPR1A	Cas12a	Cas12a_332	10:86890138-86890163	-	AAAAAGGCAAGGTgCTAAGGT	TTTA	AGCACTTTAAAAAAGGCAAGGTgCTAAGGTTACT	-	-5	-	42.61	-	CACCAGAGGAT>C	exon
NM_004329.3:c.127_137del	BMPR1A	spCas9	spCas9_333	10:86890101-86890124	+	AATCAGACTCCGACCAgAAA	TGG	TGAAATCAGACTCCGACCAgAAATGGAGTA	32.03	-1	25.96	-	62.34	GAAAAAGTCAGA>G	exon									-0.241247
NM_004329.3:c.127_137del	BMPR1A	spCas9	spCas9_334	10:86890113-86890136	-	TGCTAAGGTTACTCCATTTc	TGG	TGGTGCTAAGGTTACTCCATTTcTGGTCGG	34.67	3	34.26	-	64.57	GAAAAAGTCAGA>G	exon									-0.158235
NM_004329.3:c.127_137del	BMPR1A	saCas9	saCas9_336	10:86890100-86890127	+	AAATCAGACTCCGACCAgAAA	TGGAGT	ATGAAATCAGACTCCGACCAgAAATGGAGTAACC	-	-1	-	-	63.39	GAAAAAGTCAGA>G	exon
NM_004329.3:c.127_137del	BMPR1A	saCas9	saCas9_337	10:86890106-86890133	-	TAAGGTTACTCCATTTcTGGT	CGGAGT	TGCTAAGGTTACTCCATTTcTGGTCGGAGTCTGA	-	-2	-	-	70.07	GAAAAAGTCAGA>G	exon
NM_004329.3:c.139G>T	BMPR1A	saCas9	saCas9_338	10:86890111-86890138	+	CGACCAGAAAAAGTCAGAAAA	TtGAGT	CTCCGACCAGAAAAAGTCAGAAAATtGAGTAACC	-	5	-	-	61.6	G>T	exon
NM_004329.3:c.1401C>A	BMPR1A	spCas9	spCas9_339	10:86923425-86923448	-	TCACGCATATCTTCtTATGA	CGG	ACCTCACGCATATCTTCtTATGACGGATCA	51.96	-3	24.33	-	70.14	C>A	exon									-0.140988
NM_004329.3:c.1401C>A	BMPR1A	saCas9	saCas9_340	10:86923423-86923450	-	CCTCACGCATATCTTCtTATG	ACGGAT	CAACCTCACGCATATCTTCtTATGACGGATCACT	-	-2	-	-	67.4	C>A	exon
NM_004329.3:c.39del	BMPR1A	Cas12a	Cas12a_341	10:86876035-86876060	+	CATCAGATTATTGGGAgCTAT	TTTA	ATACATTTACATCAGATTATTGGGAgCTATTTGT	-	-2	-	42.57	-	GC>G	5utr
NM_004329.3:c.1101_1102dup	BMPR1A	CasX	CasX_342	10:86919397-86919421	-	TGATGAGGATGTTgttTTTG	TTCT	CATTTTTCTTGATGAGGATGTTgttTTTGCTCT	-	-4	-	-	-	A>AAC	exon
NM_004329.3:c.1101_1102dup	BMPR1A	Cas12a	Cas12a_343	10:86919397-86919422	-	TTGATGAGGATGTTgttTTTG	TTTC	CCATTTTTCTTGATGAGGATGTTgttTTTGCTCT	-	-2	-	3.72	-	A>AAC	exon
NM_000527.5:c.1467C>G	LDLR	CBE	CBE_0	19:11113628-11113651	-	CGGTCCAcTAGATGTTGCTG	TGG	AGTCGGTCCAcTAGATGTTGCTGTGGATCC		8					exon	TAg>***	-	2		TAC>Tyr	-	TAA>***	Nonsense
NM_000527.5:c.926C>A	LDLR	ABE	ABE_1	19:11107493-11107516	+	GATGAACaCATCAAAGAGTG	CGG	TCAGATGAACaCATCAAAGAGTGCGGTGAG		8					exon	CaC>His	-	2		CCC>Pro	-	CGC>Arg	Non-conservative
NM_000527.5:c.1594T>A	LDLR	ABE	ABE_2	19:11116094-11116117	+	CTTCATGaACTGGACTGACT	GGG	CAGCTTCATGaACTGGACTGACTGGGGAAC		8					exon	aAC>Asn	-	2		TAC>Tyr	-	GAC>Asp	Non-conservative
NM_000527.5:c.1102T>C	LDLR	CBE	CBE_4	19:11111548-11111571	+	CCAGCTCcGCGTGAACCTGG	AGG	CAGCCAGCTCcGCGTGAACCTGGAGGGTGG		8					exon	cGC>Arg	-	2		TGC>Cys	-	TGC>Cys	Silent
NM_000527.5:c.1060+2T>G	LDLR	CBE	CBE_7	19:11110755-11110778	-	AATCcCCTTCGCATCTTCGC	TGG	GGGAATCcCCTTCGCATCTTCGCTGGGCCA		5					intron	G	-	3		T	-	T
NM_000527.5:c.682G>A	LDLR	ABE	ABE_9	19:11105584-11105607	+	TGACaAGGAAAACTGCGGTA	TGG	ATCTGACaAGGAAAACTGCGGTATGGGCGG		5					exon	aAG>Lys	-	2		GAG>Glu	-	GAG>Glu	Silent
NM_000527.5:c.1285G>A	LDLR	ABE	ABE_11	19:11113372-11113395	+	GAACaTGGTCGCTCTGGACA	CGG	GAGGAACaTGGTCGCTCTGGACACGGAGGT		5					exon	aTG>Met	-	0		GTG>Val	-	GTG>Val	Silent
NM_000527.5:c.1291G>A	LDLR	ABE	ABE_12	19:11113375-11113398	+	CGTGGTCaCTCTGGACACGG	AGG	GAACGTGGTCaCTCTGGACACGGAGGTGGC		8					exon	aCT>Thr	-	0		GCT>Ala	-	GCT>Ala	Silent
NM_000527.5:c.1567G>A	LDLR	ABE	ABE_14	19:11113740-11113763	+	ATCaTGGTGGATCCTGTTCA	TGG	GCCATCaTGGTGGATCCTGTTCATGGGTGC		4					exon	aTG>Met	-	0		GTG>Val	-	GTG>Val	Silent
NM_000527.5:c.670G>A	LDLR	ABE	ABE_15	19:11105569-11105592	+	CTGCAAGaACAAATCTGACG	AGG	CGACTGCAAGaACAAATCTGACGAGGAAAA		8					exon	aAC>Asn	-	3		GAC>Asp	-	GAC>Asp	Silent
NM_000527.5:c.523G>A	LDLR	ABE	ABE_16	19:11105424-11105447	+	GCGAAaATGGCTCGGATGAG	TGG	ACTGCGAAaATGGCTCGGATGAGTGGCCGC		6					exon	aAT>Asn	-	3		GAT>Asp	-	GAT>Asp	Silent
NM_000527.5:c.1987+2T>G	LDLR	CBE	CBE_17	19:11120217-11120240	-	CCTTcCCTCTTGGCTGGGTG	AGG	CACCCTTcCCTCTTGGCTGGGTGAGGTTGT		5					intron	G	-	3		T	-	T
NM_000527.5:c.428G>C	LDLR	CBE	CBE_18	19:11105330-11105353	+	TCCTcCCCGGTGCTCACCTG	TGG	GCCTCCTcCCCGGTGCTCACCTGTGGTCCC		5					exon	TcC>Ser	-	3		TGC>Cys	-	TTC>Phe	Non-conservative
NM_000527.5:c.259T>G	LDLR	CBE	CBE_19	19:11102713-11102736	-	TCCcGAACTGAGGAATGCAG	CGG	ACCTCCcGAACTGAGGAATGCAGCGGTTGA		4					exon	gGG>Gly	-	1		TGG>Trp	-	AGG>Arg	Non-conservative
NM_000527.5:c.530C>T	LDLR	ABE	ABE_20	19:11105418-11105441	-	ATCCaAGCCATCTTCGCAGT	CGG	CTCATCCaAGCCATCTTCGCAGTCGGGGTC		5					exon	TtG>Leu	-	1		TCG>Ser	-	TCG>Ser	Silent
NM_000527.5:c.621C>T	LDLR	ABE	ABE_22	19:11105512-11105535	-	TGCACTCaCCACTTAGGCAG	TGG	GGATGCACTCaCCACTTAGGCAGTGGAACT		8					exon	GGt>Gly	-	1		GGC>Gly	-	GGC>Gly	Silent
NM_000527.5:c.693C>A	LDLR	ABE	ABE_23	19:11105595-11105618	+	ACTGaGGTATGGGCGGGGCC	AGG	AAAACTGaGGTATGGGCGGGGCCAGGGTGG		5					exon	TGa>***	-	1		TGC>Cys	-	TGG>Trp	Non-conservative
NM_000527.4:c.694+2T>C	LDLR	CBE	CBE_25	19:11105595-11105618	+	ACTGCGGcATGGGCGGGGCC	AGG	AAAACTGCGGcATGGGCGGGGCCAGGGTGG		8					intron	C	-	1		T	-	T
NM_000527.5:c.314-2A>T	LDLR	ABE	ABE_28	19:11105203-11105226	-	TGGGGGCaGCAGGGATGGAT	GGG	TCTTGGGGGCaGCAGGGATGGATGGGCCGA		8					intron	T	-	0		A	-	G
NM_000527.5:c.377T>C	LDLR	CBE	CBE_29	19:11105280-11105303	+	AGTcCGTCTGTGACTCAGAC	CGG	GGCAGTcCGTCTGTGACTCAGACCGGGACT		4					exon	TcC>Ser	-	2		TTC>Phe	-	TTC>Phe	Silent
NM_000527.5:c.41T>A	LDLR	ABE	ABE_30	19:11089584-11089607	+	CGCCTaGCTCCTCGCCGCGG	CGG	CGTCGCCTaGCTCCTCGCCGCGGCGGGGAC		6					exon	TaG>***	-	0		TTG>Leu	-	TGG>Trp	Conservative
NM_000527.5:c.1757C>G	LDLR	CBE	CBE_33	19:11116892-11116915	-	GCTTcAGATGGAGTGAAGTT	TGG	GATGCTTcAGATGGAGTGAAGTTTGGAGTC		5					exon	TgA>***	-	0		TCA>Ser	-	TAA>***	Nonsense
NM_000527.5:c.1596C>G	LDLR	CBE	CBE_34	19:11116087-11116110	-	AGTCCAcTACATGAAGCTGG	TGG	GTCAGTCCAcTACATGAAGCTGGTGGGAGG		7					exon	TAg>***	-	2		TAC>Tyr	-	TAA>***	Nonsense
NM_000527.5:c.1137T>A	LDLR	ABE	ABE_36	19:11111587-11111610	+	GTGaGAGGAAGGCTTCCAGC	TGG	CCAGTGaGAGGAAGGCTTCCAGCTGGACCC		4					exon	TGa>***	-	2		TGT>Cys	-	TGG>Trp	Non-conservative
NM_000527.5:c.684G>C	LDLR	CBE	CBE_37	19:11105584-11105607	+	TGACGAcGAAAACTGCGGTA	TGG	ATCTGACGAcGAAAACTGCGGTATGGGCGG		7					exon	GAc>Asp	-	1		GAG>Glu	-	GAT>Asp	Conservative
NM_000527.5:c.1061-1G>T	LDLR	ABE	ABE_39	19:11111494-11111517	-	TATaTGGAAGAGAGAGAAAG	AGG	CGATATaTGGAAGAGAGAGAAAGAGGCTTG		4					exon	tAT>Tyr	-	2		GAT>Asp	-	CAT>His	Non-conservative
NM_000527.5:c.954C>A	LDLR	ABE	ABE_40	19:11110660-11110683	+	GAATGaTTGGACAACAACGG	CGG	AACGAATGaTTGGACAACAACGGCGGCTGT		6					exon	TGa>***	-	0		TGC>Cys	-	TGG>Trp	Non-conservative
NM_024675.4:c.1378C>T	PALB2	ABE	ABE_0	16:23635163-23635186	+	ACTTTaGTCAGTTTCCTCAT	TGG	TTCACTTTaGTCAGTTTCCTCATTGGAAAG		6					intron	T	-	0		C	-	G
NM_024675.4:c.1042C>T	PALB2	ABE	ABE_1	16:23635498-23635521	+	GATTTTaTTCTTTTAAGTTT	TGG	TTTGATTTTaTTCTTTTAAGTTTTGGTTTT		7					intron	T	-	0		C	-	G
NM_024675.4:c.1858G>T	PALB2	ABE	ABE_2	16:23630289-23630312	+	AGAGGTCaAAAGTCTTCATC	AGG	TTAAGAGGTCaAAAGTCTTCATCAGGTAAC		8					intron	T	-	1		G	-	G
NM_024675.4:c.343G>T	PALB2	ABE	ABE_3	16:23636199-23636222	+	AATCaTCCTGGGCCATCTCC	AGG	GGTAATCaTCCTGGGCCATCTCCAGGGTTA		5					intron	T	-	0		G	-	G
NM_024675.4:c.37G>T	PALB2	ABE	ABE_5	16:23641114-23641137	+	TCCTTCTaCTCACAGCTGAG	GGG	TTTTCCTTCTaCTCACAGCTGAGGGGCTTC		8					exon	tAG>***	-	0		GAG>Glu	-	CAG>Gln	Non-conservative
NM_024675.4:c.652G>T	PALB2	ABE	ABE_6	16:23635890-23635913	+	TCTTaATTAATTTCTGTAAC	TGG	CTGTCTTaATTAATTTCTGTAACTGGTTCT		5					intron	T	-	2		G	-	G
NM_024675.4:c.62T>A	PALB2	ABE	ABE_7	16:23638100-23638123	-	AGAAATaAGCATTCTTGAAA	AGG	AGGAGAAATaAGCATTCTTGAAAAGGGAAT		7					intron	A	-	3		T	-	G
NM_024675.4:c.854C>A	PALB2	ABE	ABE_9	16:23635675-23635698	-	TACTTaACCTGTAAGTTTGG	AGG	ATTTACTTaACCTGTAAGTTTGGAGGCACA		6					intron	A	-	1		C	-	G
NM_206933.4:c.6382T>C	USH2A	CBE	CBE_0	1:216000489-216000512	-	TGGGCcGTACAAACAGTTCC	TGG	ATGTGGGCcGTACAAACAGTTCCTGGGTCC		6					exon	cGT>Arg	-	1		TGT>Cys	-	TGT>Cys	Silent
NM_206933.4:c.1234T>A	USH2A	ABE	ABE_2	1:216324245-216324268	-	AGGACaGGCAATATTTTGCC	AGG	GGGAGGACaGGCAATATTTTGCCAGGAATT		6					exon	aGG>Arg	-	1		TGG>Trp	-	GGG>Gly	Non-conservative
NM_206933.4:c.3073C>T	USH2A	ABE	ABE_3	1:216217465-216217488	+	CAAATTaTTTACAGAAACAC	TGG	TGACAAATTaTTTACAGAAACACTGGCCTG		7					exon	tAA>***	-	1		CAA>Gln	-	CAA>Gln	Silent
NM_206933.4:c.9739+2T>C	USH2A	CBE	CBE_4	1:215813718-215813741	-	ACCAGGcGAGGGTTATTTCC	AGG	TCTACCAGGcGAGGGTTATTTCCAGGTGTA		7					intron	C	-	0		T	-	T
NM_206933.4:c.2766T>A	USH2A	ABE	ABE_5	1:216246611-216246634	-	CTGTGaGTGCCTAATCGTCA	AGG	TGCCTGTGaGTGCCTAATCGTCAAGGAAGA		6					exon	TGa>***	-	0		TGT>Cys	-	TGG>Trp	Non-conservative
NM_206933.4:c.9552C>A	USH2A	ABE	ABE_6	1:215816996-215817019	-	TTGaTATTCTTCTGAAGCTA	AGG	CATTTGaTATTCTTCTGAAGCTAAGGTAAG		4					exon	TGa>***	-	1		TGC>Cys	-	TGG>Trp	Non-conservative
NM_206933.4:c.4378G>T	USH2A	ABE	ABE_7	1:216190236-216190259	+	TTGTCaTGCTCCCGAAGCAC	TGG	AGTTTGTCaTGCTCCCGAAGCACTGGTCAC		6					exon	tGA>***	-	0		GGA>Gly	-	CGA>Arg	Non-conservative
NM_206933.4:c.89T>A	USH2A	ABE	ABE_8	1:216422233-216422256	-	ATATCCTaGACTGAGTCACG	AGG	TCAATATCCTaGACTGAGTCACGAGGTCTT		8					exon	TaG>***	-	0		TTG>Leu	-	TGG>Trp	Conservative
NM_206933.4:c.14802C>G	USH2A	CBE	CBE_9	1:215640718-215640741	+	GGCTCGcTACTGAGGCACTG	TGG	TGGGGCTCGcTACTGAGGCACTGTGGGGAG		7					exon	TAg>***	-	1		TAC>Tyr	-	TAA>***	Nonsense
NM_206933.4:c.14586T>G	USH2A	CBE	CBE_12	1:215647723-215647746	+	GTTCcTAGCTAAAATGAGAA	TGG	GGAGTTCcTAGCTAAAATGAGAATGGATAC		5					exon	TAg>***	-	2		TAT>Tyr	-	TAA>***	Nonsense
NM_206933.4:c.1152T>G	USH2A	CBE	CBE_13	1:216324340-216324363	+	TAATcTAAAACACCTGAAAA	TGG	TGATAATcTAAAACACCTGAAAATGGAAAG		5					exon	TAg>***	-	0		TAT>Tyr	-	TAA>***	Nonsense
NM_206933.4:c.9959-1G>C	USH2A	CBE	CBE_14	1:215790267-215790290	-	GTTGCAcGTATGTTCTGTTG	TGG	ATTGTTGCAcGTATGTTCTGTTGTGGGCAG		7					intron	C	-	1		G	-	T
NM_206933.4:c.14174G>A	USH2A	ABE	ABE_16	1:215650743-215650766	-	AGCTaGACATGGTGCAGAAC	CGG	AGTAGCTaGACATGGTGCAGAACCGGGCCA		5					exon	TaG>***	-	2		TGG>Trp	-	TGG>Trp	Silent
NM_206933.4:c.1696C>T	USH2A	ABE	ABE_18	1:216292315-216292338	+	ACTTaATCACCTTGGCGGAA	AGG	TAAACTTaATCACCTTGGCGGAAAGGCTTG		5					exon	tAA>***	-	2		CAA>Gln	-	CAA>Gln	Silent
NM_206933.4:c.3648C>A	USH2A	ABE	ABE_19	1:216199774-216199797	-	CAAGTAaGATTTTTCTGTAC	AGG	TGCCAAGTAaGATTTTTCTGTACAGGCGTG		7					exon	TAa>***	-	2		TAC>Tyr	-	TAG>***	Nonsense
NM_206933.4:c.10691C>G	USH2A	CBE	CBE_20	1:215782085-215782108	+	TGATATcAATATTCCTGAAA	TGG	AGCTGATATcAATATTCCTGAAATGGTTGA		7					exon	TgA>***	-	0		TCA>Ser	-	TAA>***	Nonsense
NM_206933.4:c.11416G>T	USH2A	ABE	ABE_21	1:215743302-215743325	+	TTGTACTaCACAGGAATTTC	GGG	ACATTGTACTaCACAGGAATTTCGGGGATG		8					exon	tAG>***	-	1		GAG>Glu	-	CAG>Gln	Non-conservative
NM_206933.4:c.11194C>T	USH2A	ABE	ABE_23	1:215759694-215759717	+	TCTaCTCCTCACTGCCACCC	AGG	AATTCTaCTCCTCACTGCCACCCAGGAAAA		4					exon	tAG>***	-	0		CAG>Gln	-	CAG>Gln	Silent
NM_206933.4:c.9319G>T	USH2A	ABE	ABE_24	1:215838037-215838060	+	TGTCTTaCACAGTGGTAATT	TGG	GAGTGTCTTaCACAGTGGTAATTTGGGTTC		7					exon	tAA>***	-	1		GAA>Glu	-	CAA>Gln	Non-conservative
NM_206933.4:c.633G>A	USH2A	ABE	ABE_26	1:216418513-216418536	-	ATGaATTCATCTTAGTGTGC	AGG	GAAATGaATTCATCTTAGTGTGCAGGTGAG		4					exon	TGa>***	-	2		TGG>Trp	-	TGG>Trp	Silent
NM_206933.4:c.11556T>A	USH2A	ABE	ABE_27	1:215741515-215741538	-	GAAGTTGaGGAGTTAGCAGT	AGG	AAGGAAGTTGaGGAGTTAGCAGTAGGATGT		8					exon	TGa>***	-	0		TGT>Cys	-	TGG>Trp	Non-conservative
NM_206933.4:c.9298G>T	USH2A	ABE	ABE_28	1:215838059-215838082	+	GGTTCaATTGCTTTTCACGC	AGG	TTGGGTTCaATTGCTTTTCACGCAGGCATA		6					exon	tGA>***	-	1		GGA>Gly	-	CGA>Arg	Non-conservative
NM_206933.4:c.9669T>A	USH2A	ABE	ABE_29	1:215813790-215813813	-	TTGTTGaGGTGGCCGAATAC	AGG	AGTTTGTTGaGGTGGCCGAATACAGGAGGC		7					exon	TGa>***	-	0		TGT>Cys	-	TGG>Trp	Non-conservative
NM_206933.4:c.8628G>A	USH2A	ABE	ABE_31	1:215877794-215877817	-	CGGTGaCACAATATTTATTC	AGG	AATCGGTGaCACAATATTTATTCAGGAACT		6					exon	TGa>***	-	1		TGG>Trp	-	TGG>Trp	Silent
NM_206933.4:c.14791+4A>G	USH2A	CBE	CBE_32	1:215647511-215647534	+	CTTATACcCACATTCTTTTT	GGG	CCACTTATACcCACATTCTTTTTGGGTGGT		8					intron	G	-	2		A	-	T
NM_002641.4:c.230G>T	PIGA	ABE	ABE_0	X:15331696-15331719	+	CTTTTaGATTTCCATAAGCA	TGG	TGCCTTTTaGATTTCCATAAGCATGGGTGA		6					exon	CtA>Leu	-	1		CGA>Arg	-	CCA>Pro	Non-conservative
NM_002641.4:c.616A>T	PIGA	ABE	ABE_2	X:15331311-15331334	+	GGAAaGACGGACACTATTTC	AGG	TTAGGAAaGACGGACACTATTTCAGGATTC		5					exon	tTT>Phe	-	2		ATT>Ile	-	CTT>Leu	Conservative
NM_000533.5:c.661G>T	PLP1	ABE	ABE_3	X:103788460-103788483	-	TTGGAGCaACAAACCTTGCC	AGG	AGGTTGGAGCaACAAACCTTGCCAGGGAAA		8					exon	tGC>Cys	-	2		GGC>Gly	-	CGC>Arg	Non-conservative
NM_000533.5:c.737G>C	PLP1	CBE	CBE_5	X:103789368-103789391	+	TGTGGcGGCTGCAGCTACAC	TGG	ATTTGTGGcGGCTGCAGCTACACTGGTTTC		6					exon	GcG>Ala	-	1		GGG>Gly	-	GTG>Val	Non-conservative
NM_000533.5:c.173A>G	PLP1	CBE	CBE_6	X:103785732-103785755	-	CTCAcAGTCTTGGTAGTTTT	TGG	ATACTCAcAGTCTTGGTAGTTTTTGGAGAA		5					exon	TgT>Cys	-	1		TAT>Tyr	-	TAT>Tyr	Silent
NM_000533.5:c.607G>A	PLP1	ABE	ABE_7	X:103787945-103787968	+	TGTGCTaATGCCAGAATGTA	TGG	CTCTGTGCTaATGCCAGAATGTATGGTGAG		7					exon	aAT>Asn	-	1		GAT>Asp	-	GAT>Asp	Silent
NM_000533.5:c.817C>T	PLP1	ABE	ABE_8	X:103790565-103790588	-	TGCCTCaGCCCATGAGTTTA	AGG	TGGTGCCTCaGCCCATGAGTTTAAGGACGG		7					exon	tGA>***	-	0		CGA>Arg	-	CGA>Arg	Silent
NM_000533.5:c.607G>C	PLP1	CBE	CBE_9	X:103787945-103787968	+	TGTGCTcATGCCAGAATGTA	TGG	CTCTGTGCTcATGCCAGAATGTATGGTGAG		7					exon	cAT>His	-	1		GAT>Asp	-	TAT>Tyr	Non-conservative
NM_000533.5:c.295C>T	PLP1	ABE	ABE_10	X:103786551-103786574	-	GATCTaCCTGACTGCGCCGG	TGG	AAAGATCTaCCTGACTGCGCCGGTGGTGTA		6					exon	tAG>***	-	0		CAG>Gln	-	CAG>Gln	Silent
NM_000533.5:c.725C>T	PLP1	ABE	ABE_11	X:103789343-103789366	-	TGCAaCAATAAACAGGTGGA	AGG	AAATGCAaCAATAAACAGGTGGAAGGTCAT		5					exon	GtT>Val	-	3		GCT>Ala	-	GCT>Ala	Silent
NM_000533.5:c.180T>G	PLP1	CBE	CBE_12	X:103785742-103785765	-	TGATGAGcTACTCATAGTCT	TGG	CATTGATGAGcTACTCATAGTCTTGGTAGT		8					exon	TAg>***	-	0		TAT>Tyr	-	TAA>***	Nonsense
NM_000533.5:c.696+1G>A	PLP1	ABE	ABE_13	X:103788505-103788528	+	GCTGAGaTGAGTGGGTTATT	TGG	ACAGCTGAGaTGAGTGGGTTATTTGGGTTA		7					intron	A	-	1		G	-	G
NM_000533.5:c.435G>A	PLP1	ABE	ABE_15	X:103786705-103786728	+	ATGaCTAGGACATCCCGACA	AGG	AAAATGaCTAGGACATCCCGACAAGGTGAT		4					exon	TGa>***	-	1		TGG>Trp	-	TGG>Trp	Silent
NM_000533.5:c.453G>A	PLP1	ABE	ABE_16	X:103786719-103786742	+	CCGACAAaGTGATCATCCTC	AGG	ATCCCGACAAaGTGATCATCCTCAGGATTT		8					exon	AAa>Lys	-	3		AAG>Lys	-	AAG>Lys	Silent
NM_000533.5:c.665C>G	PLP1	CBE	CBE_17	X:103788460-103788483	-	TTGcAGCCACAAACCTTGCC	AGG	AGGTTGcAGCCACAAACCTTGCCAGGGAAA		4					exon	TgC>Cys	-	2		TCC>Ser	-	TAC>Tyr	Non-conservative
NM_000533.5:c.21T>A	PLP1	ABE	ABE_18	X:103785593-103785616	+	TGCTGaGCAAGATGTCTGGT	AGG	GAGTGCTGaGCAAGATGTCTGGTAGGGGCC		6					intron	A	-	1		T	-	G
NM_000533.5:c.646C>T	PLP1	ABE	ABE_21	X:103788445-103788468	-	TTGCCAGaGAAAGCATTCCA	TGG	ACCTTGCCAGaGAAAGCATTCCATGGGAGA		8					exon	tCT>Ser	-	1		CCT>Pro	-	CCT>Pro	Silent
NM_005032.7:c.766C>T	PLS3	ABE	ABE_23	X:115636836-115636859	-	ATCTCaGAGTAAAGCAGCCA	AGG	ACCATCTCaGAGTAAAGCAGCCAAGGCTAG		6					exon	tGA>***	-	1		CGA>Arg	-	CGA>Arg	Silent
NM_005032.7:c.1169G>A	PLS3	ABE	ABE_24	X:115643487-115643510	+	ATTGACTaGACTCTATTAGA	AGG	GATATTGACTaGACTCTATTAGAAGGTAAC		8					exon	TaG>***	-	1		TGG>Trp	-	TGG>Trp	Silent
NM_001330360.2:c.463-2A>T	POLA1	ABE	ABE_25	X:24715121-24715144	-	TTTCaGGAAATGATAAAGAA	AGG	AGCTTTCaGGAAATGATAAAGAAAGGTAAC		5					intron	T	-	2		A	-	G
NM_001330360.2:c.525+1G>A	POLA1	ABE	ABE_26	X:24715198-24715221	+	ACTGAGaTAAATGAATCTCC	AGG	AACACTGAGaTAAATGAATCTCCAGGAGTT		7					intron	A	-	2		G	-	G
NM_001330360.2:c.254T>G	POLA1	CBE	CBE_27	X:24703319-24703342	-	CCACAcTCCAGTCATCATCC	TGG	CATCCACAcTCCAGTCATCATCCTGGCGTG		6					exon	AgT>Ser	-	3		ATT>Ile	-	AAT>Asn	Non-conservative
NM_203475.3:c.1023+2T>A	PORCN	ABE	ABE_28	X:48515790-48515813	+	ACATGaGAGCAGGGTGGAGC	AGG	CCTACATGaGAGCAGGGTGGAGCAGGATCA		6					intron	A	-	1		T	-	G
NM_203475.3:c.1094G>A	PORCN	ABE	ABE_29	X:48516061-48516084	+	TCCTCCaGAAGCGCCTGGCT	CGG	TAGTCCTCCaGAAGCGCCTGGCTCGGATCC		7					exon	CaG>Gln	-	1		CGG>Arg	-	CGG>Arg	Silent
NM_203475.3:c.268C>T	PORCN	ABE	ABE_30	X:48511407-48511430	-	GTCaGCAGAGGAACAGCACG	AGG	AATGTCaGCAGAGGAACAGCACGAGGTAGC		4					exon	tGA>***	-	2		CGA>Arg	-	CGA>Arg	Silent
NM_203475.3:c.1186C>T	PORCN	ABE	ABE_31	X:48517177-48517200	-	GCTCaCACCCCCAGGCCCTG	TGG	AAGGCTCaCACCCCCAGGCCCTGTGGGGGA		5					exon	tGA>***	-	1		CGA>Arg	-	CGA>Arg	Silent
NM_203475.3:c.566G>A	PORCN	ABE	ABE_33	X:48512596-48512619	+	GGTaGCTGCAGAAGGTGGCC	CGG	GCCGGTaGCTGCAGAAGGTGGCCCGGAGCC		4					exon	TaG>***	-	0		TGG>Trp	-	TGG>Trp	Silent
NM_203475.3:c.82C>T	PORCN	ABE	ABE_34	X:48509886-48509909	-	AGATCTaGTCAAGGCCCTGC	TGG	GCCAGATCTaGTCAAGGCCCTGCTGGGCAG		7					5utr	T	-	0		C	-	G
NM_203475.3:c.374-2A>G	PORCN	CBE	CBE_36	X:48512307-48512330	-	GCCCCcATGTGTGGTGCCCA	TGG	TGTGCCCCcATGTGTGGTGCCCATGGTCAA		6					intron	G	-	2		A	-	T
NM_203475.3:c.283C>T	PORCN	ABE	ABE_37	X:48511425-48511448	-	CGCCTCaATGGGAGGAATGT	CGG	AGACGCCTCaATGGGAGGAATGTCGGCAGA		7					exon	tGA>***	-	1		CGA>Arg	-	CGA>Arg	Silent
NM_000307.5:c.235C>T	POU3F4	ABE	ABE_38	X:83508542-83508565	-	GTCCTaCTGGTCCAGGGGGC	TGG	CACGTCCTaCTGGTCCAGGGGGCTGGTGGC		6					exon	tAG>***	-	0		CAG>Gln	-	CAG>Gln	Silent
NM_000307.5:c.499C>T	POU3F4	ABE	ABE_39	X:83508807-83508830	-	GCTCTCaGAGCACCGGGTGC	AGG	GGGGCTCTCaGAGCACCGGGTGCAGGCTCT		7					exon	tGA>***	-	1		CGA>Arg	-	CGA>Arg	Silent
NM_000307.5:c.478C>T	POU3F4	ABE	ABE_40	X:83508784-83508807	-	CTCTaTGCAGAGGCGGCAGC	TGG	AGGCTCTaTGCAGAGGCGGCAGCTGGAGGT		5					exon	tAG>***	-	1		CAG>Gln	-	CAG>Gln	Silent
NM_000307.5:c.916C>T	POU3F4	ABE	ABE_41	X:83509225-83509248	-	ATCTCCTaCGCGGCAGGCTT	GGG	GAGATCTCCTaCGCGGCAGGCTTGGGACAC		8					exon	tAG>***	-	0		CAG>Gln	-	CAG>Gln	Silent
NM_000307.5:c.232C>T	POU3F4	ABE	ABE_42	X:83508539-83508562	-	CTGCTaGTCCAGGGGGCTGG	TGG	GTCCTGCTaGTCCAGGGGGCTGGTGGCCAG		6					exon	tAG>***	-	0		CAG>Gln	-	CAG>Gln	Silent
NM_001032382.2:c.627C>A	PQBP1	ABE	ABE_43	X:48902774-48902797	+	GCTCATAaTCAGACGCCCCC	CGG	CTAGCTCATAaTCAGACGCCCCCCGGTAAG		8					exon	TAa>***	-	2		TAC>Tyr	-	TAG>***	Nonsense
NM_002764.4:c.398A>C	PRPS1	CBE	CBE_44	X:107640988-107641011	+	TTCTCcAATTCAGGTATCAG	TGG	TGCTTCTCcAATTCAGGTATCAGTGGAAGC		6					exon	CcA>Pro	-	1		CAA>Gln	-	CTA>Leu	Non-conservative
NM_002764.4:c.586C>T	PRPS1	ABE	ABE_45	X:107645215-107645238	-	CTTCCaTTCTTTGTGAATCA	AGG	CTTCTTCCaTTCTTTGTGAATCAAGGCAAA		6					exon	tGG>Trp	-	0		CGG>Arg	-	CGG>Arg	Silent
NM_002764.4:c.343A>G	PRPS1	CBE	CBE_46	X:107640921-107640944	-	TAGCAcATTTGCAACAAGCT	TGG	AGATAGCAcATTTGCAACAAGCTTGGCTGA		6					exon	gTG>Val	-	1		ATG>Met	-	ATG>Met	Silent
NM_171998.4:c.574G>A	RAB39B	ABE	ABE_47	X:155260853-155260876	-	GAGTaGATTTGTACCAAATG	TGG	GAAGAGTaGATTTGTACCAAATGTGGTTCA		5					exon	aGA>Arg	-	1		GGA>Gly	-	GGA>Gly	Silent
NM_171998.4:c.215+1G>A	RAB39B	ABE	ABE_48	X:155264057-155264080	-	GTTCAGaTGGGAGCGCAGTC	CGG	GAGGTTCAGaTGGGAGCGCAGTCCGGGCCC		7					exon	AGa>Arg	-	1		AGG>Arg	-	AGG>Arg	Silent
NM_005676.5:c.2038C>T	RBM10	ABE	ABE_50	X:47185127-47185150	-	TCATCTCaCAGGGAGCTGAT	AGG	TCGTCATCTCaCAGGGAGCTGATAGGCTGG		8					exon	tGA>***	-	0		CGA>Arg	-	CGA>Arg	Silent
NM_005676.5:c.292C>T	RBM10	ABE	ABE_52	X:47171103-47171126	-	CCGTCTCaGGGGAAGCCTGG	CGG	TCGCCGTCTCaGGGGAAGCCTGGCGGGCCG		8					exon	tGA>***	-	0		CGA>Arg	-	CGA>Arg	Silent
NM_005676.5:c.1249-1G>A	RBM10	ABE	ABE_54	X:47181207-47181230	+	CCCTTCAaGCCTCCCAAGGT	GGG	CTGCCCTTCAaGCCTCCCAAGGTGGGGAGG		8					exon	CAa>Gln	-	1		CAG>Gln	-	CAG>Gln	Silent
NM_016120.4:c.1795C>T	RLIM	ABE	ABE_57	X:74591517-74591540	+	AGCaATCGATGCAGTGGACA	TGG	ACCAGCaATCGATGCAGTGGACATGGTACT		4					exon	tGC>Cys	-	2		CGC>Arg	-	CGC>Arg	Silent
NM_016120.4:c.1159C>T	RLIM	ABE	ABE_58	X:74592151-74592174	+	TCTACaAATGGGAATTCTGA	TGG	GATTCTACaAATGGGAATTCTGATGGTACT		6					exon	tGT>Cys	-	3		CGT>Arg	-	CGT>Arg	Silent
NM_016120.4:c.1067A>G	RLIM	CBE	CBE_59	X:74592245-74592268	+	TCAcAGGTGACAGTGTTGTT	TGG	CTTTCAcAGGTGACAGTGTTGTTTGGTGTC		4					exon	TgT>Cys	-	0		TAT>Tyr	-	TAT>Tyr	Silent
NM_006915.3:c.901G>T	RP2	ABE	ABE_60	X:46877507-46877530	-	TTAAACTaCAAGGCAATAAC	AGG	CCATTAAACTaCAAGGCAATAACAGGACCT		8					exon	tAG>***	-	2		GAG>Glu	-	CAG>Gln	Non-conservative
NM_007294.4:c.3810C>A	BRCA1	ABE	ABE_0	17:43091702-43091725	-	CTGaAGTAACCAGGTAATAT	TGG	TGACTGaAGTAACCAGGTAATATTGGCAAA		4					intron	A	-	3		C	-	G
NM_007294.4:c.4225C>T	BRCA1	ABE	ABE_1	17:43082530-43082553	+	TTTCCTaCTGGAGCTTTATC	AGG	CCATTTCCTaCTGGAGCTTTATCAGGTTAT		7					exon	tAG>***	-	0		CAG>Gln	-	CAG>Gln	Silent
NM_007294.4:c.4349C>G	BRCA1	CBE	CBE_2	17:43082406-43082429	+	TTTTCTcATGTGCTTTGTTC	TGG	CCTTTTTCTcATGTGCTTTGTTCTGGATTT		7					exon	TgA>***	-	1		TCA>Ser	-	TAA>***	Nonsense
NM_007294.4:c.4364T>G	BRCA1	CBE	CBE_3	17:43076602-43076625	+	GAAGTTcATACTGCTTTAAA	TGG	TGTGAAGTTcATACTGCTTTAAATGGAATG		7					intron	G	-	0		T	-	T
NM_007294.4:c.4432G>T	BRCA1	ABE	ABE_4	17:43076537-43076560	+	CCTaAAACTTGTCAGCAGAA	AGG	ACACCTaAAACTTGTCAGCAGAAAGGCCTT		4					intron	T	-	3		G	-	G
NM_007294.4:c.3979C>T	BRCA1	ABE	ABE_5	17:43091547-43091570	+	AGACTaATGCCTCATTTGTT	TGG	TTCAGACTaATGCCTCATTTGTTTGGAAGA		6					intron	T	-	1		C	-	G
NM_007294.4:c.2570T>A	BRCA1	ABE	ABE_6	17:43092944-43092967	-	GTATTaGCAGAATACATTCA	AGG	TCAGTATTaGCAGAATACATTCAAGGTTTC		6					intron	A	-	1		T	-	G
NM_007294.4:c.441+2T>G	BRCA1	CBE	CBE_7	17:43104116-43104139	+	TTTTcCCAAGGAAGGATTTT	CGG	TGGTTTTcCCAAGGAAGGATTTTCGGGTTC		5					intron	G	-	2		T	-	T
NM_007294.4:c.1483G>T	BRCA1	ABE	ABE_9	17:43094041-43094064	+	GGACGCTaTTGTATTATCTG	TGG	AGGGGACGCTaTTGTATTATCTGTGGCTCA		8					intron	T	-	0		G	-	G
NM_007294.4:c.4485-1G>T	BRCA1	ABE	ABE_10	17:43074515-43074538	+	GGATGACaTAGAAAGATAAA	TGG	AGGGGATGACaTAGAAAGATAAATGGAAGG		8					intron	T	-	1		G	-	G
NM_007294.4:c.2680A>T	BRCA1	ABE	ABE_12	17:43092848-43092871	+	GTTaCTTTAAGGACCCAGAG	TGG	TTTGTTaCTTTAAGGACCCAGAGTGGGCAG		4					intron	T	-	1		A	-	G
NM_007294.4:c.2197G>T	BRCA1	ABE	ABE_13	17:43093330-43093353	+	TTCTaTTCTTTTTCTTCTCT	TGG	AGTTTCTaTTCTTTTTCTTCTCTTGGAAGG		5					intron	T	-	0		G	-	G
NM_007294.4:c.2194G>T	BRCA1	ABE	ABE_14	17:43093330-43093353	+	TTCTCTTaTTTTTCTTCTCT	TGG	AGTTTCTCTTaTTTTTCTTCTCTTGGAAGG		8					intron	T	-	0		G	-	G
NM_007294.4:c.2188G>T	BRCA1	ABE	ABE_16	17:43093339-43093362	+	TTTTaTTCTCTTGGAAGGCT	AGG	TCTTTTTaTTCTCTTGGAAGGCTAGGATTG		5					intron	T	-	0		G	-	G
NM_007294.4:c.2641G>T	BRCA1	ABE	ABE_17	17:43092886-43092909	+	CATTaCTCTTCTGCATTTCC	TGG	GCACATTaCTCTTCTGCATTTCCTGGATTT		5					intron	T	-	0		G	-	G
NM_007294.4:c.2410C>T	BRCA1	ABE	ABE_18	17:43093117-43093140	+	CACTaACTCACACATTTATT	TGG	GCACACTaACTCACACATTTATTTGGTTCT		5					intron	T	-	1		C	-	G
NM_018122.5:c.1452C>G	DARS2	CBE	CBE_0	1:173853438-173853461	-	GTGGcAAATCTACCACCCAA	AGG	AGAGTGGcAAATCTACCACCCAAAGGAAAG		5					exon	TTg>Leu	-	0		TTC>Phe	-	TTA>Leu	Conservative
NM_018122.5:c.1837C>T	DARS2	ABE	ABE_1	1:173857587-173857610	-	CATGAaGTCATGTCCCCGGA	AGG	GCTCATGAaGTCATGTCCCCGGAAGGACTT		6					exon	tTC>Phe	-	1		CTC>Leu	-	CTC>Leu	Silent
NM_018122.5:c.228-15C>A	DARS2	ABE	ABE_2	1:173828311-173828334	+	TTTCCCCaCCCCCATTAATC	AGG	TCTTTTCCCCaCCCCCATTAATCAGGCAAA		8					intron	A	-	0		C	-	G
NM_018122.5:c.562C>T	DARS2	ABE	ABE_3	1:173833426-173833449	-	GTCaCAGGTTATACTGCATT	TGG	TCAGTCaCAGGTTATACTGCATTTGGAAAC		4					exon	tGA>***	-	1		CGA>Arg	-	CGA>Arg	Silent
NM_018122.5:c.742C>T	DARS2	ABE	ABE_4	1:173837003-173837026	-	AGAAGTTaCTTAAACTGTTG	AGG	ATCAGAAGTTaCTTAAACTGTTGAGGACTC		8					exon	tAA>***	-	1		CAA>Gln	-	CAA>Gln	Silent
NM_018122.5:c.20T>A	DARS2	ABE	ABE_5	1:173825243-173825266	+	CTTGGTaAAGTCAGCTGTAC	AGG	CTTCTTGGTaAAGTCAGCTGTACAGGGGTT		7					exon	TaA>***	-	2		TTA>Leu	-	TGA>***	Nonsense
NM_001918.5:c.634C>T	DBT	ABE	ABE_8	1:100216118-100216141	+	TCTaCTTTTCCAAATAGTTG	AGG	CTGTCTaCTTTTCCAAATAGTTGAGGATAT		4					exon	tAG>***	-	0		CAG>Gln	-	CAG>Gln	Silent
NM_001918.5:c.901C>T	DBT	ABE	ABE_9	1:100214848-100214871	+	ATTCCACaAGCAAATGCAAT	GGG	TTAATTCCACaAGCAAATGCAATGGGTTTT		8					exon	tGT>Cys	-	2		CGT>Arg	-	CGT>Arg	Silent
NM_001918.5:c.670G>T	DBT	ABE	ABE_10	1:100216078-100216101	+	ATAATTTaAACTTTGGGTGA	AGG	GGCATAATTTaAACTTTGGGTGAAGGAGGC		8					exon	tAA>***	-	2		GAA>Glu	-	CAA>Gln	Non-conservative
NM_001918.5:c.827T>G	DBT	CBE	CBE_12	1:100214924-100214947	+	AACCAcAATGAGGTATCTTC	AGG	AATAACCAcAATGAGGTATCTTCAGGGCTG		6					exon	TgT>Cys	-	1		TTT>Phe	-	TAT>Tyr	Conservative
NM_001918.5:c.1385G>C	DBT	CBE	CBE_14	1:100196303-100196326	-	TGTCACcCTTCTCCAATTTG	TGG	CAATGTCACcCTTCTCCAATTTGTGGAAAT		7					exon	CcC>Pro	-	3		CGC>Arg	-	CTC>Leu	Non-conservative
NM_001918.5:c.206T>C	DBT	CBE	CBE_15	1:100235463-100235486	-	AAGCcCTCAGACATTGGAGA	AGG	TTCAAGCcCTCAGACATTGGAGAAGGGATT		5					exon	CcC>Pro	-	3		CTC>Leu	-	CTC>Leu	Silent
NM_001918.5:c.29G>A	DBT	ABE	ABE_17	1:100249777-100249800	-	GAGAACCaGGAGCAGGAATG	CGG	GCTGAGAACCaGGAGCAGGAATGCGGGGAA		8					exon	CaG>Gln	-	2		CGG>Arg	-	CGG>Arg	Silent
NM_022836.4:c.364C>T	DCLRE1B	ABE	ABE_20	1:113908002-113908025	-	GTGTATCaAAAATCACCTGG	AGG	GGTGTGTATCaAAAATCACCTGGAGGAATA		8					exon	tGA>***	-	2		CGA>Arg	-	CGA>Arg	Silent
NM_022836.4:c.248A>G	DCLRE1B	CBE	CBE_21	1:113907037-113907060	-	TTTCAcCTAGGGGTAATACA	TGG	CAATTTCAcCTAGGGGTAATACATGGCTCT		6					exon	GgT>Gly	-	2		GAT>Asp	-	GAT>Asp	Silent
NM_022836.4:c.807C>T	DCLRE1B	ABE	ABE_22	1:113911384-113911407	-	GGATGACaTGGATATCAGGG	TGG	AAGGGATGACaTGGATATCAGGGTGGGAGC		8					exon	CAt>His	-	1		CAC>His	-	CAC>His	Silent
NM_006182.4:c.1045C>T	DDR2	ABE	ABE_24	1:162761383-162761406	-	GTATTaACACTTGATGGCAC	TGG	ATGGTATTaACACTTGATGGCACTGGCCAT		6					exon	tAA>***	-	2		CAA>Gln	-	CAA>Gln	Silent
NM_006182.4:c.2304T>A	DDR2	ABE	ABE_25	1:162778595-162778618	+	GCAAGaGATGTGTGGGCCTT	TGG	ACAGCAAGaGATGTGTGGGCCTTTGGGGTT		6					exon	AGa>Arg	-	2		AGT>Ser	-	AGG>Arg	Non-conservative
NM_006182.4:c.2140C>T	DDR2	ABE	ABE_28	1:162776211-162776234	-	AGTTTCaTGTGGCCAGATCT	CGG	AACAGTTTCaTGTGGCCAGATCTCGGTGAA		7					exon	tGA>***	-	0		CGA>Arg	-	CGA>Arg	Silent
NM_006182.4:c.2254C>T	DDR2	ABE	ABE_29	1:162776322-162776345	-	AGCaGATAGGGAGCACTGCC	CGG	TCCAGCaGATAGGGAGCACTGCCCGGCCCT		4					exon	tGC>Cys	-	2		CGC>Arg	-	CGC>Arg	Silent
NM_003676.4:c.517C>T	DEGS1	ABE	ABE_30	1:224189993-224190016	-	GGTCaAAAGGCATAAAAGAG	AGG	AGAGGTCaAAAGGCATAAAAGAGAGGCTGA		5					exon	tGA>***	-	3		CGA>Arg	-	CGA>Arg	Silent
NM_014762.4:c.1218+1G>A	DHCR24	ABE	ABE_31	1:54854018-54854041	-	CCACaTGAGTGGGGCAGGGC	AGG	CATCCACaTGAGTGGGGCAGGGCAGGGAGG		5					exon	aTG>Met	-	1		GTG>Val	-	GTG>Val	Silent
NM_205861.3:c.614G>A	DHDDS	ABE	ABE_33	1:26457859-26457882	+	TACaGACTTCTGGAGAAGTG	CGG	TGATACaGACTTCTGGAGAAGTGCGGCTGA		4					exon	CaG>Gln	-	1		CGG>Arg	-	CGG>Arg	Silent
NM_205861.3:c.124A>G	DHDDS	CBE	CBE_34	1:26438212-26438235	-	GGCACTcCTTGGCATAGCGA	CGG	CCTGGCACTcCTTGGCATAGCGACGGTTCC		7					5utr	G	-	2		A	-	T
NM_205861.3:c.698C>G	DHDDS	CBE	CBE_35	1:26460060-26460083	-	ACTCTcGCCACAGAACGGGT	TGG	TATACTCTcGCCACAGAACGGGTTGGAACA		6					exon	CgA>Arg	-	3		CCA>Pro	-	CAA>Gln	Non-conservative
NM_001367479.1:c.6166C>T	DNAH14	ABE	ABE_36	1:225206144-225206167	-	GCACATCaGCTGACAGTAGC	AGG	ATGGCACATCaGCTGACAGTAGCAGGACTG		8					exon	tGA>***	-	1		CGA>Arg	-	CGA>Arg	Silent
NM_001256864.2:c.2410C>T	DNAJC6	ABE	ABE_37	1:65406037-65406060	-	CGGTTCTaGGGAGAGGAGTG	GGG	GGTCGGTTCTaGGGAGAGGAGTGGGGCATG		8					exon	tAG>***	-	0		CAG>Gln	-	CAG>Gln	Silent
NM_001256864.2:c.801-2A>G	DNAJC6	CBE	CBE_38	1:65385695-65385718	-	AGGTATCcGAAACAGAAGGT	TGG	CCCAGGTATCcGAAACAGAAGGTTGGCACT		8					intron	G	-	1		A	-	T
NM_001367561.1:c.3709C>T	DOCK7	ABE	ABE_39	1:62529342-62529365	+	GCCACTCaAGCCTTTATCTG	AGG	ATGGCCACTCaAGCCTTTATCTGAGGGTCA		8					exon	tGA>***	-	2		CGA>Arg	-	CGA>Arg	Silent
NM_001367561.1:c.5059C>T	DOCK7	ABE	ABE_41	1:62494430-62494453	+	ATCaCAGATCTGGAGAGGTC	TGG	TCAATCaCAGATCTGGAGAGGTCTGGTAAC		4					exon	tGA>***	-	2		CGA>Arg	-	CGA>Arg	Silent
NM_001367561.1:c.2869C>T	DOCK7	ABE	ABE_42	1:62543729-62543752	+	CAACTTCaATCCATAGCCTA	TGG	TTACAACTTCaATCCATAGCCTATGGAGTG		8					exon	tGA>***	-	1		CGA>Arg	-	CGA>Arg	Silent
NM_001367561.1:c.2278C>T	DOCK7	ABE	ABE_43	1:62559136-62559159	+	TGATTCaCATGTCCCCAATT	CGG	CCATGATTCaCATGTCCCCAATTCGGACTG		7					exon	tGA>***	-	1		CGA>Arg	-	CGA>Arg	Silent
NM_001367561.1:c.2683C>T	DOCK7	ABE	ABE_44	1:62552812-62552835	+	TTCaAGAACGATTTAAATTA	AGG	GGCTTCaAGAACGATTTAAATTAAGGCTTG		4					exon	tGA>***	-	3		CGA>Arg	-	CGA>Arg	Silent
NM_001367561.1:c.1501C>T	DOCK7	ABE	ABE_45	1:62619914-62619937	+	AGTCaCCGTAAGACAGAAGA	TGG	CTTAGTCaCCGTAAGACAGAAGATGGCCTT		5					exon	tGA>***	-	0		CGA>Arg	-	CGA>Arg	Silent
NM_001367561.1:c.2359C>T	DOCK7	ABE	ABE_46	1:62559058-62559081	+	ATCaGACCACTGGTTCCAGC	TGG	GAAATCaGACCACTGGTTCCAGCTGGGATG		4					exon	tGA>***	-	2		CGA>Arg	-	CGA>Arg	Silent
NM_015958.3:c.329A>G	DPH5	CBE	CBE_47	1:101013747-101013770	+	GCAcTGTGAATAACTCTATA	AGG	GAGGCAcTGTGAATAACTCTATAAGGAATT		4					exon	AgT>Ser	-	0		AAT>Asn	-	AAT>Asn	Silent
NM_153741.2:c.27G>A	DPM3	ABE	ABE_48	1:155140198-155140221	-	GCTTTGaGGACTAGCGATCC	TGG	GTGGCTTTGaGGACTAGCGATCCTGGGCTC		7					exon	TGa>***	-	0		TGG>Trp	-	TGG>Trp	Silent
NM_153741.2:c.41T>C	DPM3	CBE	CBE_50	1:155140183-155140206	-	GATCCcGGGCTCCACCTGGG	TGG	AGCGATCCcGGGCTCCACCTGGGTGGCCCT		6					exon	CcG>Pro	-	2		CTG>Leu	-	CTG>Leu	Silent
NM_153741.2:c.244C>T	DPM3	ABE	ABE_51	1:155139991-155140014	+	CGGCTCaGGCCTCCTGTATC	TGG	AGTCGGCTCaGGCCTCCTGTATCTGGCTCT		7					exon	tGA>***	-	0		CGA>Arg	-	CGA>Arg	Silent
NM_001937.5:c.544C>T	DPT	ABE	ABE_52	1:168696604-168696627	+	CACTGGCaATCCCTGTGGGA	GGG	TTCCACTGGCaATCCCTGTGGGAGGGAGAG		8					exon	tGC>Cys	-	1		CGC>Arg	-	CGC>Arg	Silent
NM_000110.4:c.61C>T	DPYD	ABE	ABE_53	1:97883347-97883370	+	GTGTTCaAGGATTTAAAGCC	AGG	TTTGTGTTCaAGGATTTAAAGCCAGGATAC		7					exon	tGA>***	-	1		CGA>Arg	-	CGA>Arg	Silent
NM_006306.4:c.2122del	SMC1A	spCas9	spCas9_0	X:53405070-53405093	+	TTGAGCCGCATCTGCaTCCA	TGG	TACTTGAGCCGCATCTGCaTCCATGGGCCT	46.74	-2	52.34	-	62.53	TC>T	exon									0.0614918
NM_006306.4:c.2122del	SMC1A	spCas9	spCas9_2	X:53405074-53405097	-	CAGGCCCATGGAtGCAGATG	CGG	TCTCAGGCCCATGGAtGCAGATGCGGCTCA	55.8	-5	64.22	-	91.87	TC>T	exon									0.203094
NM_006306.4:c.2611C>T	SMC1A	saCas9	saCas9_3	X:53396554-53396581	-	ATGGCTCAGCTAtAAGACCTG	AAGAAT	ACCATGGCTCAGCTAtAAGACCTGAAGAATCAGC	-	-6	-	-	54.59	C>T	exon
NM_006306.4:c.511C>T	SMC1A	spCas9	spCas9_4	X:53413326-53413349	-	GGAGTATGACAAGtGAAAGA	AGG	GCAGGAGTATGACAAGtGAAAGAAGGAAAT	50.52	-4	67.04	-	46.18	C>T	exon									0.209485
NM_006306.4:c.511C>T	SMC1A	CasX	CasX_5	X:53413310-53413334	+	GCCTTCACCATTTCCTTCTT	TTCA	TCCTCTTCAGCCTTCACCATTTCCTTCTTTCaC	-	4	-	-	-	C>T	exon
NM_006306.4:c.628C>T	SMC1A	spCas9	spCas9_7	X:53413111-53413134	+	CATCCTTCAGGCGCTaGTAC	CGG	CCTCATCCTTCAGGCGCTaGTACCGGTCAG	50.81	-2	64.74	-	58.31	C>T	exon									0.188545
NM_006306.4:c.628C>T	SMC1A	spCas9	spCas9_8	X:53413113-53413136	-	TGACCGGTACtAGCGCCTGA	AGG	GGCTGACCGGTACtAGCGCCTGAAGGATGA	57.91	-7	55.96	-	53.66	C>T	exon									0.159036
NM_006306.4:c.628C>T	SMC1A	saCas9	saCas9_9	X:53413111-53413138	-	GCTGACCGGTACtAGCGCCTG	AAGGAT	CAGGCTGACCGGTACtAGCGCCTGAAGGATGAGG	-	-6	-	-	57.68	C>T	exon
NM_006306.4:c.628C>T	SMC1A	CasX	CasX_10	X:53413131-53413155	-	CCTGTTTGCACAGGCTGACC	TTCC	CACCATTCCCCTGTTTGCACAGGCTGACCGGTA	-	7	-	-	-	C>T	exon
NM_006306.4:c.628C>T	SMC1A	Cas12a	Cas12a_11	X:53413122-53413147	-	CACAGGCTGACCGGTACtAGC	TTTG	CCCTGTTTGCACAGGCTGACCGGTACtAGCGCCT	-	-1	-	54.1	-	C>T	exon
NM_006306.4:c.2343T>A	SMC1A	spCas9	spCas9_12	X:53403639-53403662	-	AGGTGTTTGAAGAGTTTTGa	CGG	ATGAGGTGTTTGAAGAGTTTTGaCGGGAGA	50.85	3	43.51	-	56.75	T>A	exon									0.0145047
NM_006306.4:c.157dup	SMC1A	spCas9	spCas9_15	X:53415099-53415122	+	GGTCTTTACCCGCAGGTTGC	TGg	CAGGGTCTTTACCCGCAGGTTGCTGgtGTT	36.56	6	24.53	-	62.23	C>CA	exon									-0.226606
NM_006306.4:c.157dup	SMC1A	saCas9	saCas9_16	X:53415105-53415132	-	GTGAAAAAACacCAGCAACCT	GCGGGT	TAGGTGAAAAAACacCAGCAACCTGCGGGTAAAG	-	-7	-	-	68.22	C>CA	exon
NM_006306.4:c.157dup	SMC1A	Cas12a	Cas12a_17	X:53415103-53415128	+	CCCGCAGGTTGCTGgtGTTTT	TTTA	GGGTCTTTACCCGCAGGTTGCTGgtGTTTTTTCA	-	-4	-	44.11	-	C>CA	exon
NM_006306.4:c.157dup	SMC1A	Cas12a	Cas12a_18	X:53415117-53415142	-	TGCTAGGTGAAAAAACacCAG	TTTG	TCAGCTTTGTGCTAGGTGAAAAAACacCAGCAAC	-	-1	-	62.71	-	C>CA	exon
NM_006306.4:c.1192C>T	SMC1A	saCas9	saCas9_19	X:53411804-53411831	+	TGGTCAGCTTTCTGGTCTCaA	TTGAAT	TCCTGGTCAGCTTTCTGGTCTCaATTGAATTTCT	-	2	-	-	54.7	C>T	exon
NM_006306.4:c.3249dup	SMC1A	spCas9	spCas9_20	X:53382531-53382554	-	ACATTGATGAGAgaTCTATA	AGG	CCAACATTGATGAGAgaTCTATAAGGCCCT	40.74	-4	33.4	-	79.77	A>AG	exon									-0.1346
NM_006306.4:c.1335C>T	SMC1A	spCas9	spCas9_21	X:53409408-53409431	+	CAGAGCTACATACTTaCTAG	TGG	ATGCAGAGCTACATACTTaCTAGTGGTGAT	55.92	-2	60.29	-	82.41	C>T	exon									0.174327
NM_006306.4:c.1958C>T	SMC1A	spCas9	spCas9_22	X:53405341-53405364	-	CAGAAGTCAGGAGTGATCTt	TGG	TTCCAGAAGTCAGGAGTGATCTtTGGTGGG	30.02	3	12.47	-	65.99	C>T	exon									-0.365104
NM_006306.4:c.1958C>T	SMC1A	CasX	CasX_26	X:53405324-53405348	+	GGTCACTGGCCCCACCAaAG	TTCA	TGGCCTTCAGGTCACTGGCCCCACCAaAGATCA	-	-2	-	-	-	C>T	exon
NM_006306.4:c.1958C>T	SMC1A	CasX	CasX_27	X:53405343-53405367	-	AGAAGTCAGGAGTGATCTtT	TTCC	CCCTATTCCAGAAGTCAGGAGTGATCTtTGGTG	-	-1	-	-	-	C>T	exon
NM_006306.4:c.1495C>T	SMC1A	spCas9	spCas9_28	X:53409097-53409120	+	TTATCTCTGCCTTTCaCTGC	TGG	CCATTATCTCTGCCTTTCaCTGCTGGCGGC	39.17	-2	40.47	-	66.89	C>T	exon									-0.0816224
NM_006306.4:c.1495C>T	SMC1A	spCas9	spCas9_30	X:53409105-53409128	-	GAGCAGCCGCCAGCAGtGAA	AGG	GGAGAGCAGCCGCCAGCAGtGAAAGGCAGA	34.51	-1	42.97	-	68.64	C>T	exon									-0.0887133
NM_006306.4:c.1495C>T	SMC1A	CasX	CasX_31	X:53409092-53409116	+	ATTATCTCTGCCTTTCaCTG	TTCC	ATGCTTTCCATTATCTCTGCCTTTCaCTGCTGG	-	-3	-	-	-	C>T	exon
NM_006306.4:c.1495C>T	SMC1A	Cas12a	Cas12a_32	X:53409091-53409116	+	CATTATCTCTGCCTTTCaCTG	TTTC	GATGCTTTCCATTATCTCTGCCTTTCaCTGCTGG	-	-1	-	45.69	-	C>T	exon
NM_006306.4:c.909G>C	SMC1A	spCas9	spCas9_33	X:53412184-53412207	+	TTTGTGGGAGGTGTTgTCCT	TGG	GATTTTGTGGGAGGTGTTgTCCTTGGCTTT	39.61	-2	34.5	-	54.41	G>C	exon									-0.124397
NM_006306.4:c.909G>C	SMC1A	CasX	CasX_34	X:53412176-53412200	+	TGATTTTGTGGGAGGTGTTg	TTCT	CCAGCTTCTTGATTTTGTGGGAGGTGTTgTCCT	-	1	-	-	-	G>C	exon
NM_006306.4:c.909G>C	SMC1A	Cas12a	Cas12a_35	X:53412184-53412209	+	TGGGAGGTGTTgTCCTTGGCT	TTTG	TTGATTTTGTGGGAGGTGTTgTCCTTGGCTTTGA	-	-7	-	37.37	-	G>C	exon
NM_006306.4:c.2890_2893del	SMC1A	spCas9	spCas9_36	X:53394856-53394879	-	CTCCCAGGGGGAGGACTCAG	TGg	TAGCTCCCAGGGGGAGGACTCAGTGgTTCA	61.19	6	47.34	-	66.86	GGTGA>G	exon									0.10316
NM_006306.4:c.2890_2893del	SMC1A	saCas9	saCas9_37	X:53394839-53394866	+	CTGGAAATTCTCTGTGAAcCA	CTGAGT	ATACTGGAAATTCTCTGTGAAcCACTGAGTCCTC	-	1	-	-	62.2	GGTGA>G	exon
NM_006306.4:c.2890_2893del	SMC1A	saCas9	saCas9_38	X:53394844-53394871	-	GGGAGGACTCAGTGgTTCACA	GAGAAT	AGGGGGAGGACTCAGTGgTTCACAGAGAATTTCC	-	-4	-	-	62.47	GGTGA>G	exon
NM_006306.4:c.2514G>A	SMC1A	CasX	CasX_39	X:53399613-53399637	+	TCTTTTTTCACTGTCTGCTC	TTCA	TCATTTTCATCTTTTTTCACTGTCTGCTCtCAC	-	2	-	-	-	G>A	exon
NM_006306.4:c.2514G>A	SMC1A	Cas12a	Cas12a_40	X:53399612-53399637	+	ATCTTTTTTCACTGTCTGCTC	TTTC	CTCATTTTCATCTTTTTTCACTGTCTGCTCtCAC	-	4	-	1.53	-	G>A	exon
NM_006306.4:c.1487G>A	SMC1A	spCas9	spCas9_42	X:53409097-53409120	+	TTATCTCTGCCTTTCGCTGC	TGG	CCATTATCTCTGCCTTTCGCTGCTGGtGGC	37.92	7	31.09	-	68.85	G>A	exon									-0.166707
NM_006306.4:c.1487G>A	SMC1A	CasX	CasX_44	X:53409092-53409116	+	ATTATCTCTGCCTTTCGCTG	TTCC	ATGCTTTCCATTATCTCTGCCTTTCGCTGCTGG	-	6	-	-	-	G>A	exon
NM_006306.4:c.2351T>C	SMC1A	spCas9	spCas9_45	X:53403631-53403654	-	GAAGAGTTTTGTCGGGAGAc	TGG	TTTGAAGAGTTTTGTCGGGAGAcTGGTGTG	43.73	3	16.91	-	58.09	T>C	exon									-0.246315
NM_006306.4:c.2351T>C	SMC1A	Cas12a	Cas12a_46	X:53403632-53403657	-	AAGAGTTTTGTCGGGAGAcTG	TTTG	AGGTGTTTGAAGAGTTTTGTCGGGAGAcTGGTGT	-	1	-	26.07	-	T>C	exon
NM_006306.4:c.2814dup	SMC1A	Cas12a	Cas12a_47	X:53396258-53396283	+	ACAGTGGCAACTtaTAATGTC	TTTG	TGCCTTTTGACAGTGGCAACTtaTAATGTCCTGC	-	-6	-	56.75	-	A>AT	exon
NM_006306.4:c.3022C>T	SMC1A	saCas9	saCas9_48	X:53383193-53383220	-	ATGAACACACTGCAGtAGAAG	CTGAAT	GAGATGAACACACTGCAGtAGAAGCTGAATGAGC	-	-3	-	-	48.41	C>T	exon
NM_006306.4:c.116C>G	SMC1A	spCas9	spCas9_49	X:53415153-53415176	+	CATGAGATTTcACTTACCTA	AGG	ATCCATGAGATTTcACTTACCTAAGGGAAG	48.34	-7	31.44	-	71.06	C>G	exon									-0.103824
NM_006306.4:c.116C>G	SMC1A	spCas9	spCas9_50	X:53415151-53415174	-	CTTAGGTAAGTgAAATCTCA	TGG	TCCCTTAGGTAAGTgAAATCTCATGGATGC	59.93	-6	47.62	-	64.03	C>G	exon									0.0989898
NM_006306.4:c.116C>G	SMC1A	saCas9	saCas9_51	X:53415149-53415176	-	CCCTTAGGTAAGTgAAATCTC	ATGGAT	CTTCCCTTAGGTAAGTgAAATCTCATGGATGCCA	-	-5	-	-	68.29	C>G	exon
NM_006306.4:c.2173C>T	SMC1A	spCas9	spCas9_52	X:53405021-53405044	+	CAGGGCTAGATGTCaTGTCT	TGG	ATTCAGGGCTAGATGTCaTGTCTTGGTCTG	44.26	-3	52.48	-	60.02	C>T	exon									0.0489679
NM_006306.4:c.2173C>T	SMC1A	CasX	CasX_53	X:53405019-53405043	+	GGGCTAGATGTCaTGTCTTG	TTCA	GCAGATTCAGGGCTAGATGTCaTGTCTTGGTCT	-	-7	-	-	-	C>T	exon
NM_006306.4:c.615+2T>C	SMC1A	spCas9	spCas9_54	X:53413230-53413253	-	AGCAAAGCAGGAGAAAGAAG	AGG	GGAAGCAAAGCAGGAGAAAGAAGAGGcAGG	58.67	7	58.78	-	53.44	T>C	intron									0.186741
NM_006306.4:c.622C>G	SMC1A	spCas9	spCas9_57	X:53413130-53413153	-	CCCCTGTTTGCACAGGCTGA	CgG	ATTCCCCTGTTTGCACAGGCTGACgGGTAC	50.21	5	18.47	-	72.33	C>G	exon									-0.20008
NM_006306.4:c.622C>G	SMC1A	saCas9	saCas9_59	X:53413128-53413155	-	TTCCCCTGTTTGCACAGGCTG	ACgGGT	CCATTCCCCTGTTTGCACAGGCTGACgGGTACCA	-	6	-	-	74.67	C>G	exon
NM_006306.4:c.622C>G	SMC1A	CasX	CasX_60	X:53413116-53413140	+	GGCGCTGGTACCcGTCAGCC	TTCA	CATCCTTCAGGCGCTGGTACCcGTCAGCCTGTG	-	-7	-	-	-	C>G	exon
NM_006306.4:c.622C>G	SMC1A	CasX	CasX_61	X:53413131-53413155	-	CCTGTTTGCACAGGCTGACg	TTCC	CACCATTCCCCTGTTTGCACAGGCTGACgGGTA	-	1	-	-	-	C>G	exon
NM_006306.4:c.622C>G	SMC1A	Cas12a	Cas12a_62	X:53413122-53413147	-	CACAGGCTGACgGGTACCAGC	TTTG	CCCTGTTTGCACAGGCTGACgGGTACCAGCGCCT	-	-7	-	50.15	-	C>G	exon
NM_006306.4:c.2076del	SMC1A	spCas9	spCas9_63	X:53405128-53405151	-	CAGGAGCAGATGAAGGCAAA	cGG	CTTCAGGAGCAGATGAAGGCAAAcGGAAAG	50.52	4	46.4	-	55.64	CA>C	exon									0.0367096
NM_006306.4:c.2076del	SMC1A	CasX	CasX_65	X:53405134-53405158	-	CTTCAGGAGCAGATGAAGGC	TTCC	TCTTGTTCCCTTCAGGAGCAGATGAAGGCAAAc	-	5	-	-	-	CA>C	exon
NM_006306.4:c.1388_1389insC	SMC1A	spCas9	spCas9_67	X:53409216-53409239	-	GGGAGCTGACAGAGGAGGTG	cgG	AGGGGGAGCTGACAGAGGAGGTGcgGAGAT	44.66	5	63.17	-	58.21	G>GC	exon									0.139841
NM_006306.4:c.1388_1389insC	SMC1A	CasX	CasX_69	X:53409191-53409215	+	TCAATACGCCGCTTGGCCAT	TTCA	TTGATTTCATCAATACGCCGCTTGGCCATCTCc	-	5	-	-	-	G>GC	exon
NM_006306.4:c.1388_1389insC	SMC1A	Cas12a	Cas12a_70	X:53409190-53409215	+	ATCAATACGCCGCTTGGCCAT	TTTC	ATTGATTTCATCAATACGCCGCTTGGCCATCTCc	-	7	-	51.98	-	G>GC	exon
NM_006306.4:c.2369G>A	SMC1A	spCas9	spCas9_71	X:53403597-53403620	+	CCTTTTCTTCCTCAAACTCC	tGG	TCACCTTTTCTTCCTCAAACTCCtGGATGT	46.24	4	15.61	-	47.37	G>A	exon									-0.239132
NM_006306.4:c.2369G>A	SMC1A	spCas9	spCas9_72	X:53403614-53403637	-	GATTGGTGTGCGCAACATCC	aGG	GGAGATTGGTGTGCGCAACATCCaGGAGTT	55.51	4	57.09	-	54.37	G>A	exon									0.154146
NM_006306.4:c.2369G>A	SMC1A	saCas9	saCas9_74	X:53403595-53403622	+	CACCTTTTCTTCCTCAAACTC	CtGGAT	TTTCACCTTTTCTTCCTCAAACTCCtGGATGTTG	-	5	-	-	51.6	G>A	exon
NM_006306.4:c.2369G>A	SMC1A	saCas9	saCas9_75	X:53403611-53403638	-	AGATTGGTGTGCGCAACATCC	aGGAGT	GGGAGATTGGTGTGCGCAACATCCaGGAGTTTGA	-	4	-	-	53.49	G>A	exon
NM_006306.4:c.2369G>A	SMC1A	CasX	CasX_76	X:53403593-53403617	+	CCTTTTCTTCCTCAAACTCC	TTCA	GCCGTTTCACCTTTTCTTCCTCAAACTCCtGGA	-	2	-	-	-	G>A	exon
NM_006306.4:c.2369G>A	SMC1A	Cas12a	Cas12a_78	X:53403592-53403617	+	ACCTTTTCTTCCTCAAACTCC	TTTC	TGCCGTTTCACCTTTTCTTCCTCAAACTCCtGGA	-	4	-	34.38	-	G>A	exon
NM_006306.4:c.1692dup	SMC1A	spCas9	spCas9_80	X:53405807-53405830	-	GTATATCAAGGAGCAGCGTG	tgG	TCAGTATATCAAGGAGCAGCGTGtgGGGAG	58.94	5	54.25	-	59.6	G>GT	exon									0.149148
NM_006306.4:c.1692dup	SMC1A	CasX	CasX_83	X:53405810-53405834	-	GTATATCAAGGAGCAGCGTG	TTCA	CTGTATTCAGTATATCAAGGAGCAGCGTGtgGG	-	3	-	-	-	G>GT	exon
NM_006306.4:c.955_956del	SMC1A	spCas9	spCas9_84	X:53412140-53412163	+	TGAGCATTCTGcAGACTTCT	TGG	TTCTGAGCATTCTGcAGACTTCTTGGCTGC	34.75	-6	21.76	-	67.86	GTC>G	exon									-0.261662
NM_006306.4:c.955_956del	SMC1A	saCas9	saCas9_85	X:53412144-53412171	-	TGGAAGCAGCCAAGAAGTCTg	CAGAAT	AGCTGGAAGCAGCCAAGAAGTCTgCAGAATGCTC	-	3	-	-	58.99	GTC>G	exon
NM_006306.4:c.955_956del	SMC1A	CasX	CasX_86	X:53412125-53412149	+	TGTAGTGCTTCTGAGCATTC	TTCT	TACGCTTCTTGTAGTGCTTCTGAGCATTCTGcA	-	4	-	-	-	GTC>G	exon
NM_006306.4:c.481del	SMC1A	spCas9	spCas9_87	X:53413361-53413384	-	ATTTGAAGAGATTAGTCGTc	TGG	TCTATTTGAAGAGATTAGTCGTcTGGGGAG	56.87	3	30.65	-	78.36	CT>C	exon									-0.0628802
NM_006306.4:c.481del	SMC1A	Cas12a	Cas12a_91	X:53413358-53413383	-	AAGAGATTAGTCGTcTGGGGA	TTTG	CTCTATTTGAAGAGATTAGTCGTcTGGGGAGCTG	-	-4	-	36.01	-	CT>C	exon
NM_006306.4:c.10del	SMC1A	CasX	CasX_92	X:53422569-53422593	+	CAATCTCAATCAGTTTCaGA	TTCT	TAAAGTTCTCAATCTCAATCAGTTTCaGAACCC	-	-2	-	-	-	TC>T	5utr
NM_006306.4:c.1447del	SMC1A	spCas9	spCas9_93	X:53409152-53409175	-	GAACCAGGTGATGGAGaGCT	AGG	GCTGAACCAGGTGATGGAGaGCTAGGGGAT	54.72	-1	57.02	-	49.68	AC>A	exon									0.150399
NM_006306.4:c.1447del	SMC1A	saCas9	saCas9_96	X:53409148-53409175	-	GAACCAGGTGATGGAGaGCTA	GGGGAT	GCTGAACCAGGTGATGGAGaGCTAGGGGATGCCC	-	-2	-	-	50.89	AC>A	exon
NM_006306.4:c.586C>G	SMC1A	spCas9	spCas9_97	X:53413259-53413282	-	AAGAAAAATATTGCGGCTGA	AgG	CGCAAGAAAAATATTGCGGCTGAAgGCAAG	58.69	5	22.21	-	69.26	C>G	exon									-0.11898
NM_006306.4:c.586C>G	SMC1A	CasX	CasX_99	X:53413235-53413259	+	TTCTCCTGCTTTGCTTCCTT	TTCT	ACCTCTTCTTTCTCCTGCTTTGCTTCCTTGCcT	-	4	-	-	-	C>G	exon
NM_006306.4:c.586C>G	SMC1A	Cas12a	Cas12a_101	X:53413238-53413263	+	TCCTGCTTTGCTTCCTTGCcT	TTTC	TCTTCTTTCTCCTGCTTTGCTTCCTTGCcTTCAG	-	2	-	20.24	-	C>G	exon
NM_006306.4:c.3119dup	SMC1A	spCas9	spCas9_102	X:53383093-53383116	+	TTACCATCTGAGGTctCTCC	TGG	ATCTTACCATCTGAGGTctCTCCTGGAACT	54.46	-3	63.1	-	65.72	G>GA	exon									0.194042
NM_006306.4:c.3119dup	SMC1A	spCas9	spCas9_103	X:53383095-53383118	-	GTTCCAGGAGagACCTCAGA	TGG	CAAGTTCCAGGAGagACCTCAGATGGTAAG	52.34	-6	64.37	-	72.01	G>GA	exon									0.190233
NM_006306.4:c.1171C>T	SMC1A	spCas9	spCas9_104	X:53411824-53411847	+	ATTGAATTTCTCCAGCTCCT	aGG	TCGATTGAATTTCTCCAGCTCCTaGGCCAG	43.91	4	25.66	-	66.91	C>T	exon									-0.175931
NM_006306.4:c.1171C>T	SMC1A	spCas9	spCas9_107	X:53411840-53411863	-	GAGAGCAGCTACCCTGGCCt	AGG	CAAGAGAGCAGCTACCCTGGCCtAGGAGCT	49.73	3	57.83	-	66.63	C>T	exon									0.122843
NM_006306.4:c.1171C>T	SMC1A	saCas9	saCas9_109	X:53411827-53411854	+	GAATTTCTCCAGCTCCTaGGC	CAGGGT	ATTGAATTTCTCCAGCTCCTaGGCCAGGGTAGCT	-	-1	-	-	53.09	C>T	exon
NM_006306.4:c.3497A>C	SMC1A	spCas9	spCas9_110	X:53381006-53381029	+	CTTTGCACCCACCTTGCCAA	TGg	TTTCTTTGCACCCACCTTGCCAATGgTGGT	36.05	6	16.12	-	61.56	A>C	exon									-0.298596
NM_006306.4:c.3497A>C	SMC1A	spCas9	spCas9_112	X:53381021-53381044	-	GCCTTGGATAACACCAcCAT	TGG	GCTGCCTTGGATAACACCAcCATTGGCAAG	50.4	-1	43.75	-	51.33	A>C	exon									0.0155117
NM_006306.4:c.3497A>C	SMC1A	CasX	CasX_114	X:53381004-53381028	+	TTGCACCCACCTTGCCAATG	TTCT	CCACTTTCTTTGCACCCACCTTGCCAATGgTGG	-	2	-	-	-	A>C	exon
NM_006306.4:c.3497A>C	SMC1A	Cas12a	Cas12a_115	X:53381003-53381028	+	TTTGCACCCACCTTGCCAATG	TTTC	CCCACTTTCTTTGCACCCACCTTGCCAATGgTGG	-	4	-	16.64	-	A>C	exon
NM_006306.4:c.2364del	SMC1A	spCas9	spCas9_117	X:53403615-53403638	-	GAGATTGGTGTGCGCAAaTC	CGG	CGGGAGATTGGTGTGCGCAAaTCCGGGAGT	48.05	1	55.21	-	69.12	AC>A	exon									0.0907352
NM_006306.4:c.2364del	SMC1A	saCas9	saCas9_119	X:53403611-53403638	-	GAGATTGGTGTGCGCAAaTCC	GGGAGT	CGGGAGATTGGTGTGCGCAAaTCCGGGAGTTTGA	-	-1	-	-	70.15	AC>A	exon
NM_006306.4:c.2364del	SMC1A	CasX	CasX_120	X:53403593-53403617	+	CCTTTTCTTCCTCAAACTCC	TTCA	GCCGTTTCACCTTTTCTTCCTCAAACTCCCGGA	-	6	-	-	-	AC>A	exon
NM_006306.4:c.2364del	SMC1A	Cas12a	Cas12a_123	X:53403600-53403625	+	TTCCTCAAACTCCCGGAtTTG	TTTC	CACCTTTTCTTCCTCAAACTCCCGGAtTTGCGCA	-	-1	-	15.52	-	AC>A	exon
NM_006306.4:c.2364del	SMC1A	Cas12a	Cas12a_124	X:53403621-53403646	-	TCGGGAGATTGGTGTGCGCAA	TTTG	AGAGTTTTGTCGGGAGATTGGTGTGCGCAAaTCC	-	4	-	36.59	-	AC>A	exon
NM_006306.4:c.2872dup	SMC1A	spCas9	spCas9_125	X:53394860-53394883	+	CTCACTGAGTCCTCCCCCtg	TGG	CCACTCACTGAGTCCTCCCCCtgTGGGAGC	49.87	2	62.12	-	77.56	A>AC	exon									0.155639
NM_006306.4:c.2872dup	SMC1A	spCas9	spCas9_127	X:53394875-53394898	-	CATTGCAGGGTAGCTCCCAc	aGG	TGCCATTGCAGGGTAGCTCCCAcaGGGGGA	62.41	4	63.67	-	78.43	A>AC	exon									0.241153
NM_006306.4:c.3197G>A	SMC1A	CasX	CasX_132	X:53382566-53382590	+	AAACAAGCATTGAAGCGGTC	TTCA	ACAGATTCAAAACAAGCATTGAAGCGGTCAAAG	-	6	-	-	-	G>A	exon
NM_006306.4:c.3197G>A	SMC1A	CasX	CasX_133	X:53382592-53382616	-	AACAGATCAAGAAGGAGCaC	TTCG	AGGCATTCGAACAGATCAAGAAGGAGCaCTTTG	-	-1	-	-	-	G>A	exon
NM_006306.4:c.2329T>C	SMC1A	saCas9	saCas9_134	X:53403647-53403674	-	AGGTAGAGGATGAGGTGcTTG	AAGAGT	CTCAGGTAGAGGATGAGGTGcTTGAAGAGTTTTG	-	-1	-	-	47.18	T>C	exon
NM_006306.4:c.2329T>C	SMC1A	CasX	CasX_135	X:53403660-53403684	-	CTTCTCAGGTAGAGGATGAG	TTCT	CTGGCTTCTCTTCTCAGGTAGAGGATGAGGTGc	-	5	-	-	-	T>C	exon
NM_006306.4:c.2069del	SMC1A	spCas9	spCas9_137	X:53405136-53405159	-	GTTCCCTTCAGGAGCAGATG	AgG	CTTGTTCCCTTCAGGAGCAGATGAgGCAAA	51.88	5	61.36	-	50.06	GA>G	exon									0.169469
NM_006306.4:c.2069del	SMC1A	CasX	CasX_139	X:53405140-53405164	-	TGTTCCCTTCAGGAGCAGAT	TTCT	CTTCTTTCTTGTTCCCTTCAGGAGCAGATGAgG	-	4	-	-	-	GA>G	exon
NM_006306.4:c.2069del	SMC1A	Cas12a	Cas12a_141	X:53405140-53405165	-	TTGTTCCCTTCAGGAGCAGAT	TTTC	CCTTCTTTCTTGTTCCCTTCAGGAGCAGATGAgG	-	6	-	10.54	-	GA>G	exon
NM_006306.4:c.2482_2489del	SMC1A	spCas9	spCas9_142	X:53399643-53399666	+	GTGTACTTTATCTTGGTCcT	TGG	CATGTGTACTTTATCTTGGTCcTTGGTTCT	35.64	2	19.91	-	62.36	GAGGAAGTC>G	exon									-0.270031
NM_006306.4:c.2482_2489del	SMC1A	spCas9	spCas9_143	X:53399659-53399682	-	TTGGATTTTGAAAAGAACCA	AgG	CAGTTGGATTTTGAAAAGAACCAAgGACCA	64.74	5	43.07	-	72.5	GAGGAAGTC>G	exon									0.0869653
NM_006306.4:c.2482_2489del	SMC1A	CasX	CasX_144	X:53399663-53399687	-	GTTGGATTTTGAAAAGAACC	TTCA	GGGCATTCAGTTGGATTTTGAAAAGAACCAAgG	-	4	-	-	-	GAGGAAGTC>G	exon
NM_006306.4:c.2482_2489del	SMC1A	Cas12a	Cas12a_145	X:53399651-53399676	-	AAAAGAACCAAgGACCAAGAT	TTTG	TGGATTTTGAAAAGAACCAAgGACCAAGATAAAG	-	-7	-	63	-	GAGGAAGTC>G	exon
NM_006306.4:c.3151C>T	SMC1A	spCas9	spCas9_146	X:53382625-53382648	+	TGGCCTTCTTTGCTCaCTTT	CGG	GCTTGGCCTTCTTTGCTCaCTTTCGGGCTG	14.82	-2	4.07	-	62.95	C>T	exon									-0.52183
NM_006306.4:c.3151C>T	SMC1A	spCas9	spCas9_148	X:53382627-53382650	-	AGCCCGAAAGtGAGCAAAGA	AGG	AGCAGCCCGAAAGtGAGCAAAGAAGGCCAA	53.14	-7	58.3	-	52.23	C>T	exon									0.150957
NM_006306.4:c.3151C>T	SMC1A	CasX	CasX_149	X:53382611-53382635	+	AATGCCTGCTTGGCCTTCTT	TTCG	ATCTGTTCGAATGCCTGCTTGGCCTTCTTTGCT	-	7	-	-	-	C>T	exon
NM_006306.4:c.3151C>T	SMC1A	CasX	CasX_150	X:53382645-53382669	-	GGCAGAGTTTGAAGCAGCCC	TTCT	TTTCTTTCTGGCAGAGTTTGAAGCAGCCCGAAA	-	7	-	-	-	C>T	exon
NM_006306.4:c.3151C>T	SMC1A	Cas12a	Cas12a_151	X:53382633-53382658	-	AAGCAGCCCGAAAGtGAGCAA	TTTG	CAGAGTTTGAAGCAGCCCGAAAGtGAGCAAAGAA	-	-4	-	58.76	-	C>T	exon
NM_006306.4:c.2197G>T	SMC1A	spCas9	spCas9_152	X:53403878-53403901	+	CCAGCTTGGATTTTTaCTAC	AGG	TCTCCAGCTTGGATTTTTaCTACAGGCAAT	48.33	-2	33.29	-	68.1	G>T	exon									-0.0877519
NM_006306.4:c.2197G>T	SMC1A	saCas9	saCas9_153	X:53403882-53403909	+	CTTGGATTTTTaCTACAGGCA	ATGGGT	CAGCTTGGATTTTTaCTACAGGCAATGGGTTGAG	-	-7	-	-	68.64	G>T	exon
NM_006306.4:c.2197G>T	SMC1A	Cas12a	Cas12a_154	X:53403895-53403920	-	TCCTCTCAACCCATTGCCTGT	TTTG	TCTGCTTTGTCCTCTCAACCCATTGCCTGTAGtA	-	6	-	67.59	-	G>T	exon
NM_006306.4:c.1299del	SMC1A	spCas9	spCas9_155	X:53409455-53409478	-	GAAATTGAAGAGAATCAGAA	cGG	CGGGAAATTGAAGAGAATCAGAAcGGATTG	59.45	4	40.22	-	77.96	CG>C	exon									0.0310381
NM_006306.4:c.1299del	SMC1A	saCas9	saCas9_156	X:53409453-53409480	-	GGGAAATTGAAGAGAATCAGA	AcGGAT	TGCGGGAAATTGAAGAGAATCAGAAcGGATTGAG	-	5	-	-	68.57	CG>C	exon
NM_006306.4:c.1299del	SMC1A	CasX	CasX_157	X:53409438-53409462	+	TCCAGTTTCTCAATCCgTTC	TTCC	ATGTATTCCTCCAGTTTCTCAATCCgTTCTGAT	-	-3	-	-	-	CG>C	exon
NM_006306.4:c.1609del	SMC1A	spCas9	spCas9_158	X:53405875-53405898	+	CCATGTTCTTGCCCAAAaCT	TGG	CATCCATGTTCTTGCCCAAAaCTTGGTTAC	42.61	1	51.51	-	69.86	TG>T	exon									0.0283765
NM_006306.4:c.1609del	SMC1A	spCas9	spCas9_159	X:53405886-53405909	-	AGATTGCTGTAACCAAGtTT	TGG	ATCAGATTGCTGTAACCAAGtTTTGGGCAA	29.44	1	29.56	-	68.47	TG>T	exon									-0.228565
NM_006306.4:c.1990del	SMC1A	spCas9	spCas9_161	X:53405298-53405321	+	TCTCATCCCAGCGCcTGCCT	TGG	CTTTCTCATCCCAGCGCcTGCCTTGGCCTT	30.9	-3	46.49	-	72.54	GC>G	exon									-0.0819494
NM_006306.4:c.1990del	SMC1A	spCas9	spCas9_162	X:53405310-53405333	-	AGTGACCTGAAGGCCAAGGC	AgG	GCCAGTGACCTGAAGGCCAAGGCAgGCGCT	55.62	5	56.63	-	66.67	GC>G	exon									0.147251
NM_006306.4:c.1990del	SMC1A	saCas9	saCas9_165	X:53405301-53405328	-	CCTGAAGGCCAAGGCAgGCGC	TGGGAT	TGACCTGAAGGCCAAGGCAgGCGCTGGGATGAGA	-	-2	-	-	59.39	GC>G	exon
NM_006306.4:c.1990del	SMC1A	Cas12a	Cas12a_166	X:53405296-53405321	+	TCATCCCAGCGCcTGCCTTGG	TTTC	ACTGCTTTCTCATCCCAGCGCcTGCCTTGGCCTT	-	-6	-	56.15	-	GC>G	exon
NM_006306.4:c.1911+1G>T	SMC1A	spCas9	spCas9_167	X:53405477-53405500	+	GCAAGGGAATCCACAaCTTG	TGG	TGGGCAAGGGAATCCACAaCTTGTGGCGCT	50.42	-2	37.45	-	71.84	G>T	exon									-0.0424796
NM_006306.4:c.1911+1G>T	SMC1A	spCas9	spCas9_168	X:53405486-53405509	-	GCCACCAGCGCCACAAGtTG	TGG	GAGGCCACCAGCGCCACAAGtTGTGGATTC	51.45	1	43.8	-	64.99	G>T	exon									0.0178742
NM_006306.4:c.1911+1G>T	SMC1A	saCas9	saCas9_169	X:53405484-53405511	-	AGGCCACCAGCGCCACAAGtT	GTGGAT	TGGAGGCCACCAGCGCCACAAGtTGTGGATTCCC	-	2	-	-	64.05	G>T	exon
NM_006306.4:c.1911+1G>T	SMC1A	Cas12a	Cas12a_170	X:53405491-53405516	-	GAGGCCACCAGCGCCACAAGt	TTTG	TTGCCTTTGGAGGCCACCAGCGCCACAAGtTGTG	-	3	-	85.51	-	G>T	exon
NM_006306.4:c.2842_2845dup	SMC1A	spCas9	spCas9_171	X:53396231-53396254	-	TGGATGAgatgaTATTAGTC	AGG	CCATGGATGAgatgaTATTAGTCAGGAAGA	62.33	-6	54.32	-	72.03	A>AGTAG	exon									0.165676
NM_006306.4:c.2398C>T	SMC1A	spCas9	spCas9_172	X:53403588-53403611	-	TTGAGGAAGAAAAGGTGAAA	CGG	AGTTTGAGGAAGAAAAGGTGAAACGGtAGA	46.45	7	42.1	-	59.85	C>T	exon									-0.0236678
NM_006306.4:c.2398C>T	SMC1A	saCas9	saCas9_173	X:53403582-53403609	-	GAGGAAGAAAAGGTGAAACGG	tAGAAT	TTTGAGGAAGAAAAGGTGAAACGGtAGAATGAAA	-	4	-	-	60.39	C>T	exon
NM_006306.4:c.2398C>T	SMC1A	CasX	CasX_174	X:53403569-53403593	+	TGGCGATTTCATTCTaCCGT	TTCT	ACCGCTTCTTGGCGATTTCATTCTaCCGTTTCA	-	-4	-	-	-	C>T	exon
NM_006306.4:c.2398C>T	SMC1A	Cas12a	Cas12a_175	X:53403587-53403612	-	AGGAAGAAAAGGTGAAACGGt	TTTG	GGGAGTTTGAGGAAGAAAAGGTGAAACGGtAGAA	-	3	-	82.87	-	C>T	exon
NM_006306.4:c.2132G>A	SMC1A	CasX	CasX_176	X:53405048-53405072	+	AGGTCACTCTGGGAGTACTT	TTCT	GTCTGTTCTAGGTCACTCTGGGAGTACTTGAGC	-	6	-	-	-	G>A	exon
NM_006306.4:c.2973+1G>A	SMC1A	spCas9	spCas9_177	X:53394771-53394794	-	TGTGTGAGGATCTGAAGaTG	AGG	ATCTGTGTGAGGATCTGAAGaTGAGGATCA	69.39	1	74.69	-	73.07	G>A	exon									0.37414
NM_006306.4:c.2973+1G>A	SMC1A	saCas9	saCas9_178	X:53394769-53394796	-	TCTGTGTGAGGATCTGAAGaT	GAGGAT	TGATCTGTGTGAGGATCTGAAGaTGAGGATCAAC	-	2	-	-	63.41	G>A	exon
NM_006306.4:c.1717del	SMC1A	spCas9	spCas9_179	X:53405765-53405788	+	CCTCACCTCCAGGTAGTCAa	AGG	AAGCCTCACCTCCAGGTAGTCAaAGGCAAG	53.76	3	46.62	-	59.91	TC>T	exon									0.0560858
NM_006306.4:c.1717del	SMC1A	spCas9	spCas9_181	X:53405772-53405795	-	CCTTCTTGCCTtTGACTACC	TGG	AGACCTTCTTGCCTtTGACTACCTGGAGGT	44.18	-6	19.15	-	63.32	TC>T	exon									-0.22685
NM_006306.4:c.2923C>T	SMC1A	spCas9	spCas9_182	X:53394821-53394844	-	TTCCAGTATCTATGCAtGAG	AGG	AATTTCCAGTATCTATGCAtGAGAGGCCCT	57.41	-1	48	-	72.16	C>T	exon									0.0849656
NM_006306.4:c.2923C>T	SMC1A	CasX	CasX_183	X:53394832-53394856	-	CAGAGAATTTCCAGTATCTA	TTCA	AGTGGTTCACAGAGAATTTCCAGTATCTATGCA	-	6	-	-	-	C>T	exon
NM_006306.4:c.2923C>T	SMC1A	Cas12a	Cas12a_185	X:53394820-53394845	-	CAGTATCTATGCAtGAGAGGC	TTTC	GAGAATTTCCAGTATCTATGCAtGAGAGGCCCTC	-	-5	-	69.12	-	C>T	exon
NM_006306.4:c.121C>T	SMC1A	spCas9	spCas9_186	X:53415151-53415174	-	CTTAGGTAAGTCAAATtTCA	TGG	TCCCTTAGGTAAGTCAAATtTCATGGATGC	51.04	-1	18.8	-	73.3	C>T	exon									-0.192827
NM_006306.4:c.121C>T	SMC1A	saCas9	saCas9_187	X:53415149-53415176	-	CCCTTAGGTAAGTCAAATtTC	ATGGAT	CTTCCCTTAGGTAAGTCAAATtTCATGGATGCCA	-	1	-	-	76.23	C>T	exon
NM_006306.4:c.121C>T	SMC1A	CasX	CasX_188	X:53415154-53415178	-	CTTAGGTAAGTCAAATtTCA	TTCC	CCCTCTTCCCTTAGGTAAGTCAAATtTCATGGA	-	-3	-	-	-	C>T	exon
NM_006306.4:c.3283C>T	SMC1A	spCas9	spCas9_189	X:53382488-53382511	+	TAAGGGGCTCCAGCCTACCT	aGG	GGGTAAGGGGCTCCAGCCTACCTaGGCACT	47.31	4	60.74	-	61.51	C>T	exon									0.134264
NM_006306.4:c.3283C>T	SMC1A	spCas9	spCas9_190	X:53382504-53382527	-	GTCCCGCAATAGCAGTGCCt	AGG	CCTGTCCCGCAATAGCAGTGCCtAGGTAGG	54.28	3	40.44	-	62.13	C>T	exon									0.00756827
NM_006306.4:c.733_734del	SMC1A	spCas9	spCas9_193	X:53413002-53413025	+	TTCTCGATCTCCTTGTTcTG	AGG	TCCTTCTCGATCTCCTTGTTcTGAGGCCAG	42.39	1	47.16	-	42.96	GAA>G	exon									-0.000511785
NM_006306.4:c.733_734del	SMC1A	spCas9	spCas9_194	X:53413011-53413034	-	AAGGAACTGGCCTCAgAACA	AGG	AACAAGGAACTGGCCTCAgAACAAGGAGAT	56.6	-2	73.28	-	76.19	GAA>G	exon									0.287106
[truncated: 451,466+ more rows]

## Sheet: Supplementary Table 2
Gene	Phenotype (ClinVar)	Cell_1	Cell_2	Cell_3	Cell_4	Cell_5
A2ML1	Nonsyndromic otitis media | Otitis media, susceptibility to | Otitis media, susceptibility to, 166760	Ear
A4GALT	Infantile cortical hyperostosis | NOR polyagglutination syndrome | Myasthenic syndrome, congenital, 2C, associated with acetylcholine receptor deficiency, 616314 Myasthenic syndrome, congenital, 3A, slow-channel, 616321 | Myasthenic syndrome, congenital, 2C, associated with acetylcholine receptor deficiency, 616314 | Myasthenic syndrome, congenital, 3A, slow-channel, 616321	Immune_Blood
AAAS	Glucocorticoid deficiency with achalasia | Spastic paraparesis;Babinski sign;Hyperreflexia | Inborn genetic diseases | Achalasia-alacrima syndrome | Neurodevelopmental disorder | Achalasia-addisonianism-alacrimia syndrome, 231550 | Triple A syndrome	CNS
AAGAB	Palmoplantar keratoderma, punctate type 1A | Keratoderma, palmoplantar, punctate type IA, 148600 | Punctate palmoplantar keratoderma type 1	Skin
AARS1	Developmental and epileptic encephalopathy, 29 | Charcot-Marie-Tooth disease type 2 | Charcot-Marie-Tooth disease axonal type 2N | Charcot-Marie-Tooth disease | Inborn genetic diseases | Hereditary diffuse leukoencephalopathy with spheroids | Leukoencephalopathy, hereditary diffuse, with spheroids 2 | Trichothiodystrophy 8, nonphotosensitive | Leukoencephalopathy, hereditary diffuse, with spheroi…	MN	Skin	PNS
AARS2	Combined oxidative phosphorylation defect type 8 | Pulmonary hypoplasia | Leukoencephalopathy, progressive, with ovarian failure | Inborn genetic diseases | Generalized muscle weakness | AARS2-Related Disorders | Combined oxidative phosphorylation deficiency 8, 614096 | Leukoencephalopathy, progressive, with ovarian failure, 615889 | Hereditary diffuse leukoencephalopathy with axonal spheroids an…	Many
AASS	Hyperlysinemia | Hyperlysinemia, 238700 | Saccharopinuria	Liver	Kidney
ABAT	Gamma-aminobutyric acid transaminase deficiency | GABA-transaminase deficiency, 613163	CNS	Liver
ABCA1	Tangier disease | Hypoalphalipoproteinemia, primary, 1 | Tangier disease, variant | ABCA1-Related Disorders | ABCA1-related dyslipidemia | Familial hypoalphalipoproteinemia | Cardiovascular phenotype | ABCA1-related condition | HDL deficiency, familial, 1, 604091 | Tangier disease, 205400 | Apolipoprotein A-I deficiency	Liver	Immune_Blood
ABCA12	Autosomal recessive congenital Ichthyosis 4B | Autosomal recessive congenital Ichthyosis 4A | Lamellar Ichthyosis | Autosomal recessive congenital Ichthyosis 4A;Autosomal recessive congenital Ichthyosis 4B | Ichthyosis, congenital, autosomal recessive 4A, 601277 | Ichthyosis, congenital, autosomal recessive 4B (harlequin), 242500 | Harlequin Ichthyosis | Congenital ichthyosiform erythroderma	Skin
ABCA13	Intellectual disability without epilepsy	CNS
ABCA2	Intellectual developmental disorder with poor growth and with or without seizures or ataxia | Ataxia with Dysarthria | Intellectual developmental disorder with poor growth and with or without seizures or ataxia, 618808 | Autosomal recessive non-syndromic Intellectual disability | Deafness, autosomal dominant 20/26, 604717	CNS
ABCA3	Hereditary pulmonary alveolar proteinosis | ABCA3-related condition | Interstitial lung disease due to ABCA3 deficiency | Primary Interstitial lung disease specific to childhood due to pulmonary surfactant protein anomalies | See cases | Surfactant metabolism dysfunction, pulmonary, 3, 610921 | Idiopathic pulmonary fibrosis | Infant acute respiratory distress syndrome	Lung	Eye
ABCA4	Retinal dystrophy | Severe early-childhood-onset retinal dystrophy | Stargardt disease | Age related macular degeneration 2 | maculopathy | Retinitis pigmentosa 19 | Autosomal recessive retinitis pigmentosa | Cone-rod dystrophy | Macular dystrophy | Retinitis pigmentosa | Cone-rod dystrophy 3 | Cone dystrophy | Retinal dystrophy, early-onset severe | Progressive cone dystrophy (without rod involv…	Eye
ABCA5	Gingival fibromatosis-hypertrichosis syndrome | Inborn genetic diseases | Hypertrichosis, congenital generalized, with gingival hyperplasia, 135400 | Congenital myopathy 8, 618654	Skin
ABCA7	ABCA7-related condition | Alzheimer disease 9, susceptibility to, 608907 | Early-onset autosomal dominant Alzheimer disease | NON RARE IN EUROPE: Alzheimer disease | Myopathy, distal, 6, adult onset, 618655	CNS
ABCB1	Colchicine resistance | Alpha-actinin-3 deficiency, 617749 | NON RARE IN EUROPE: Ulcerative colitis	Many
ABCB11	Progressive familial intrahepatic cholestasis type 2 | Benign recurrent intrahepatic cholestasis type 2 | Inborn genetic diseases | Progressive familial intrahepatic cholestasis | Progressive familial intrahepatic cholestasis type 2;Benign recurrent intrahepatic cholestasis type 2 | Cholestasis, intrahepatic, of pregnancy, 3 | Benign recurrent intrahepatic cholestasis type 2;Progressive familial …	Liver
ABCB4	Progressive familial intrahepatic cholestasis type 3 | Progressive familial intrahepatic cholestasis type 1 | Cholestasis, intrahepatic, of pregnancy, 3 | ABCB4-related condition | Low phospholipid associated cholelithiasis | Progressive familial intrahepatic cholestasis | Cholestasis, intrahepatic, of pregnancy, 3;Progressive familial intrahepatic cholestasis type 3;Low phospholipid associated c…	Liver
ABCB6	Dyschromatosis universalis hereditaria 3 | Microphthalmia, Isolated, with coloboma 7 | Familial pseudohyperkalemia | Dyschromatosis universalis hereditaria 3, 615402 | Microphthalmia, Isolated, with coloboma 7, 614497 | Pseudohyperkalemia, familial, 2, due to red cell leak, 609153 | Blood group, Langereis system, 111600 | Dyschromatosis universalis hereditaria | Coloboma of choroid and retina | C…	Skin	Immune_Blood
ABCB7	X-linked sideroblastic anemia with ataxia | Anemia, sideroblastic, with ataxia, 301310 | X-linked sideroblastic anemia and spinocerebellar ataxia	Immune_Blood
ABCC1	Hearing loss, autosomal dominant 77 | Deafness, autosomal dominant 77, 618915 | Rare autosomal dominant non-syndromic sensorineural deafness type DFNA | Congenital myopathy 2C, severe iInfantile, autosomal dominant, 620278	Ear
ABCC2	Dubin-Johnson syndrome | ABCC2-related condition | Inborn genetic diseases | not specified | Dubin-Johnson syndrome, 237500	Liver
ABCC6	Pseudoxanthoma elasticum | Arterial calcification, generalized, of infancy, 2;Pseudoxanthoma elasticum;Pseudoxanthoma elasticum, forme fruste | Pseudoxanthoma elasticum;Pseudoxanthoma elasticum, forme fruste;Arterial calcification, generalized, of infancy, 2 | ABCC6-related condition | Pseudoxanthoma elasticum, forme fruste | Abnormality of the eye | Arterial calcification, generalized, of infanc…	Many
ABCC8	Type 2 diabetes mellitus | Leucine-induced hypoglycemia;Type 2 diabetes mellitus;Diabetes mellitus, permanent neonatal 3;Diabetes mellitus, transient neonatal, 2;Hyperinsulinemic hypoglycemia, familial, 1 | Diabetes mellitus, transient neonatal, 2;Type 2 diabetes mellitus;Leucine-induced hypoglycemia;Diabetes mellitus, permanent neonatal 3;Hyperinsulinemic hypoglycemia, familial, 1 | Hyperinsulin…	Pancreas
ABCC9	Hypertrichotic osteochondrodysplasia Cantu type | Dilated cardiomyopathy 1O | 15 conditions | ABCC9-Related Disorders | ABCC9-related disorder | Inborn genetic diseases | Intellectual disability and myopathy syndrome | Kleefstra syndrome 1 | Cardiovascular phenotype | Atrial fibrillation, familial, 12, 614050 | Cardiomyopathy, dilated, 1O, 608569 | Hypertrichotic osteochondrodysplasia (Cantu synd…	Heart
ABCD1	Adrenoleukodystrophy | Primary adrenocortical insufficiency | Inborn genetic diseases | not specified | X-linked spondyloepimetaphyseal dysplasia | ABCD1-related condition | Spastic paraplegia;Spastic gait | History of neurodevelopmental disorder | Adrenoleukodystrophy, 300100 | Adrenomyeloneuropathy, adult, 300100 | Hirschsprung disease | X-linked cerebral adrenoleukodystrophy | Adrenomyeloneuro…	CNS
ABCD4	Methylmalonic acidemia with homocystinuria, type cblJ | Cobalamin C disease | Methylmalonic aciduria and homocystinuria, cblJ type, 614857	Liver	Kidney
ABCG5	Sitosterolemia | Sitosterolemia 1 | Cardiovascular phenotype | Inborn genetic diseases | Sitosterolemia 2 | ABCG5-related condition | Sitosterolemia 2, 618666 | Homozygous familial hypercholesterolemia	Liver
ABCG8	Sitosterolemia 1 | Abnormal circulating lipid concentration | Sitosterolemia | Cardiovascular phenotype | ABCG8-related condition | Gallbladder disease 4;Sitosterolemia 1 | Sitosterolemia 1, 210250 | Gallbladder disease 4, 611465 | Homozygous familial hypercholesterolemia	Liver
ABHD12	PHARC syndrome | Retinal dystrophy | Cone dystrophy | Polyneuropathy, Earing loss, ataxia, retinitis pigmentosa, and cataract, 612674 | Polyneuropathy-Earing loss-ataxia-retinitis pigmentosa-cataract syndrome	Many
ABHD16A	Spastic paraplegia 86, autosomal recessive | Complex hereditary spastic paraplegia | Spastic paraplegia 86, autosomal recessive, 619735 | Autosomal recessive spastic paraplegia type 86 | Dysalbuminemic hyperthyroxinemia, 615999	CNS
ABHD5	Triglyceride storage disease with Ichthyosis | Chanarin-Dorfman syndrome, 275630 | Neutral lipid storage disease with Ichthyosis	Many
ABL1	Congenital heart defects and skeletal malformations syndrome | Microcephaly | ChIronic myelogenous leukemia, BCR-ABL1 positive | Lip and oral cavity carcinoma | ABL1-Related Disorder | Leukemia, Philadelphia chromosome-positive, resistant to imatinib | Lymphoblastic leukemia, acute, with lymphomatous features | Abnormal skeletal morphology;Congenital heart disease;Failure to thrive | Congenital H…	Immune_Blood
ACACA	Acetyl-CoA: carboxylase deficiency | Acetyl-CoA carboxylase deficiency, 613933 | Parkinson disease, susceptibility to, 168600	Liver
ACAD8	Deficiency of isobutyryl-CoA dehydrogenase | Inborn genetic diseases | Isobutyryl-CoA dehydrogenase deficiency, 611283 | Isobutyryl-CoA dehydrogenase deficiency	Liver	Skeletal_Muscle
ACAD9	Acyl-CoA dehydrogenase 9 deficiency | Mitochondrial complex I deficiency | Mitochondrial complex I deficiency, nuclear type 20, 611126	Many
ACADM	Medium-chain acyl-coenzyme A dehydrogenase deficiency | Hydrocephalus, nonsyndromic, autosomal recessive 2 | Epileptic spasm | Medium chain dicarboxylic aciduria | ACADM-related condition | Inborn genetic diseases | not specified | Abnormal circulating lipid concentration | See cases | Acyl-CoA dehydrogenase, medium chain, deficiency of, 201450 | Medium chain acyl-CoA dehydrogenase deficiency	Liver	Skeletal_Muscle	Heart
ACADS	Deficiency of butyryl-CoA dehydrogenase | ACADS-related condition | Inborn genetic diseases | See cases | Acyl-CoA dehydrogenase, short-chain, deficiency of, 201470 | Short chain acyl-CoA dehydrogenase deficiency	Liver
ACADSB	Deficiency of 2-methylbutyryl-CoA dehydrogenase | See cases | Seizure | 2-methylbutyrylglycinuria, 610006 | 2-methylbutyryl-CoA dehydrogenase deficiency	Liver	Skeletal_Muscle
ACADVL	Very long chain acyl-CoA dehydrogenase deficiency | Abnormality of the musculature | Inborn genetic diseases | ACADVL-related condition | Cardiac arrhythmia | not specified | Very long chain fatty acid accumulation | Abnormality of circulating enzyme level;Rhabdomyolysis | Rhabdomyolysis;Myopathy | VLCAD deficiency, 201475	Liver	Skeletal_Muscle	Heart
ACAN	Short stature and advanced bone age, with early-onset osteoarthritis | Inborn genetic diseases | Osteochondritis dissecans | Short stature and advanced bone age, with or without early-onset osteoarthritis and/or osteochondritis dissecans | Spondyloepiphyseal dysplasia, Kimberley type | Short stature and advanced bone age | Short stature-advanced bone age-early-onset osteoarthritis syndrome | ACAN…	Bone
ACAT1	Deficiency of acetyl-CoA acetyltransferase | ACAT1-related condition | Inborn genetic diseases | Alpha-methylacetoacetic aciduria, 203750 | Beta-ketothiolase deficiency	Liver
ACBD5	Retinal dystrophy with leukodystrophy | Retinal dystrophy with leukodystrophy, 618863	Eye	CNS
ACBD6	Intellectual disability	CNS
ACD	Dyskeratosis congenita, autosomal dominant 6 | Dyskeratosis congenita, autosomal recessive 7 | Dyskeratosis congenita, autosomal dominant 6, 616553 | Dyskeratosis congenita, autosomal recessive 7, 616553 | Hoyeraal-Hreidarsson syndrome | Familial melanoma | Hereditary Isolated aplastic anemia	Immune_Blood
ACE	Microvascular complications of diabetes, susceptibility to, 3;Intracerebral hemorrhage;Renal tubular dysgenesis of genetic origin | Renal tubular dysgenesis | Renal tubular dysgenesis of genetic origin;Intracerebral hemorrhage;Microvascular complications of diabetes, susceptibility to, 3 | Intracerebral hemorrhage | Hereditary angioedema with normal C1Inh | Abnormality of prenatal development or …	Many
ACER3	ACER3-related condition | Alkaline ceramidase 3 deficiency | Leukodystrophy, progressive, early childhood-onset, 617762 | Alzheimer disease 1, familial, 104300	CNS
ACKR1	DUFFY BLOOD GROUP SYSTEM, FY(a-b-) PHENOTYPE | Resistance to Plasmodium vivax infection | White blood cell count quantitative trait locus 1 | DUFFY BLOOD GROUP SYSTEM, FY(bwk) PHENOTYPE | Anal canal carcinoma Neuroblastoma, susceptibility to, 3, 613014 Aneurysm, intracranial berry, 1 | Anal canal carcinoma | Neuroblastoma, susceptibility to, 3, 613014 | Aneurysm, intracranial berry, 1	Immune_Blood
ACKR3	Oculomotor-abducens synkinesis | Oculomotor-abducens synkinesis, 619215 | Amyotrophic lateral sclerosis 9, 611895	CNS
ACO2	Infantile cerebellar-retinal degeneration | Optic atrophy 9 | Inborn genetic diseases | IInfantile cerebellar-retinal degeneration | ACO2-related disorder | IInfantile cerebellar-retinal degeneration, 614559 | Optic atrophy 9, 616289 | Autosomal recessive Isolated optic atrophy	CNS
ACOT1	Generalized hypotonia	Liver
ACOX1	Acyl-CoA oxidase deficiency | Mitchell syndrome | ACOX1-related condition | ACOX1-related disorders | Inborn genetic diseases | Mitchell syndrome, 618960 | Peroxisomal acyl-CoA oxidase deficiency, 264470 | Peroxisomal acyl-CoA oxidase deficiency | Mitchell Syndrome	Liver	Kidney
ACOX2	Congenital bile acid synthesis defect 6 | Bile acid synthesis defect, congenital, 6, 617308 | Hypertension, essential, 145500	Liver
ACP4	Amelogenesis imperfecta, type 1J | Amelogenesis imperfecta, type IJ, 617297 | Hypoplastic amelogenesis imperfecta | Myocardial infarction, susceptibility to	Teeth
ACP5	Spondyloenchondrodysplasia with iImmune dysregulation | Inborn genetic diseases | ACP5-related condition | Spondyloenchondrodysplasia with iImmune dysregulation, 607944 | Spondyloenchondrodysplasia	Immune_Blood	Bone
ACR	Spermatogenic failure 87 | Spermatogenic failure 87, 620500 | Stroke, hemorrhagic, 614519	Testis
ACSF3	Combined malonic and methylmalonic acidemia | Methylmalonic acidemia | Inborn genetic diseases | ACSF3-related condition | Combined malonic and methylmalonic aciduria, 614265	Liver
ACSL4	Intellectual disability, X-linked 63 | Intellectual developmental disorder, X-linked 63, 300387 | X-linked non-syndromic Intellectual disability | Alport syndrome-Intellectual disability-midface hypoplasia-elliptocytosis syndrome | Total anomalous pulmonary venous return	CNS
ACSL5	Diarrhea 13 | Diarrhea 13, 620357 | Anosmia, Isolated congenital	Intestine
ACSS2	Nonsyndromic cleft lip palate | Lipodystrophy, familial partial, type 8	Fat
ACTA1	Actin accumulation myopathy | Congenital myopathy 2b, severe iInfantile, autosomal recessive | See cases | Congenital myopathy 2c, severe iInfantile, autosomal dominant | Progressive scapulohumeropeIroneal distal myopathy | Nemaline myopathy 3, autosomal dominant or recessive | Neurodevelopmental delay | Actin accumulation myopathy;ACTA1 gene related myopathy | Congenital myopathy with fiber type…	Skeletal_Muscle
ACTA2	Aortic aneurysm, familial thoracic 6 | Familial thoracic aortic aneurysm and aortic dissection | See cases | Descending aortic dissection | Familial aortopathy | ACTA2-Related Disorders | Isolated thoracic aortic aneurysm | Multisystemic smooth muscle dysfunction syndrome;Moyamoya disease 5;Aortic aneurysm, familial thoracic 6 | Moyamoya disease 5 | Aortic aneurysm, familial thoracic 2 | Multisys…	Vascular
ACTB	Baraitser-Winter syndrome 1 | Thrombocytopenia 8, with dysmorphic features and developmental delay | Inborn genetic diseases | BECKER NEVUS SYNDROME, SOMATIC, MOSAIC | CONGENITAL SMOOTH MUSCLE HAMARTOMA, SOMATIC, MOSAIC | BECKER NEVUS, SOMATIC, MOSAIC | Neurodevelopmental delay | Baraitser-Winter syndrome | Developmental malformations-deafness-dystonia syndrome | ACTB-related BAFopathy | Congenit…	Immune_Blood
ACTC1	Atrial septal defect 5 | Dilated cardiomyopathy 1R | Cardiomyopathy | Dilated cardiomyopathy 1R;Hypertrophic cardiomyopathy 11;Atrial septal defect 5 | Cardiovascular phenotype | Hypertrophic cardiomyopathy 11 | Left ventricular noncompaction 4 | Primary familial hypertrophic cardiomyopathy | Hypertrophic cardiomyopathy | Hypertrophic cardiomyopathy 11;Dilated cardiomyopathy 1R;Atrial septal defe…	Heart
ACTG1	Inborn genetic diseases | Baraitser-winter syndrome 2 | Neurodevelopmental delay | Baraitser-winter syndrome 2;Autosomal dominant nonsyndromic hearing loss 20 | Lissencephaly | Autosomal dominant nonsyndromic hearing loss 20;Baraitser-winter syndrome 2 | Autosomal dominant nonsyndromic hearing loss 20 | See cases | Nonsyndromic genetic hearing loss | Microcephaly | Congenital anomaly of kidney an…	Ear	Many
ACTG2	Visceral myopathy 1 | ChIronic intestinal pseudoobstruction | Megacystis-microcolon-intestinal hypoperistalsis syndrome 5 | Inborn genetic diseases | Visceral neuropathy, familial, 3, autosomal dominant | Megacystis-microcolon-intestinal hypoperistalsis syndrome 5;Visceral myopathy 1 | Megacystis;ChIronic intestinal pseudoobstruction | Megacystis-microcolon-intestinal hypoperistalsis syndrome 5, …	Many
ACTL6B	Developmental and epileptic encephalopathy, 76 | ACTL6B-related recessive epilepsy | Autism spectrum disorder | Developmental and epileptic encephalopathy 76, 618468 | Intellectual developmental disorder with severe speech and ambulation defects, 618470 | Non-specific early-onset epileptic encephalopathy | Non-specific syndromic Intellectual disability | Hypoalphalipoproteinemia, primary, 2, 6184…	CNS
ACTL7A	Male infertility with normal semen parameters | Spermatogenic failure 86 | Spermatogenic failure 86, 620499 | Apolipoprotein C-III deficiency, 614028	Testis
ACTL9	Spermatogenic failure 53 | Spermatogenic failure 53, 619258 | Non-syndromic male infertility due to sperm motility disorder | Hypercholesterolemia, familial, 2, 144010	Testis
ACTN1	Platelet-type bleeding disorder 15 | Macrothrombocytopenia | Thrombocytopenia | Inborn genetic diseases | Bleeding disorder, platelet-type, 15, 615193 | Autosomal dominant macrothrombocytopenia	Vascular
ACTN2	Cardiomyopathy, familial hypertrophic, 23, with or without ventricular noncompaction | Dilated cardiomyopathy 1AA | Primary dilated cardiomyopathy;Hypertrophic cardiomyopathy | Dilated cardiomyopathy 1AA;Primary familial hypertrophic cardiomyopathy | ACTN2-related disorders | not specified | Cardiomyopathy, dilated, 1AA, with or without LVNC, 612158 | Cardiomyopathy, hypertrophic, 23, with or wit…	Heart
ACTN4	Focal segmental glomerulosclerosis 1 | Glomerulosclerosis, focal segmental, 1, 603278 | Genetic steroid-resistant nephrotic syndrome	Kidney
ACVR1	Progressive myositis ossificans | Brainstem glioma | Inborn genetic diseases | Epicanthus | Fibrodysplasia ossificans progressiva, 135100 | Fibrodysplasia ossificans progressiva	Bone	Connective
ACVR1B	Carcinoma of pancreas | Transposition of the great arteries, dextro-looped | 46XX sex reversal 5, 618901	Vascular	Heart
ACVRL1	Telangiectasia, hereditary hemorrhagic, type 2 | Pulmonary hypertension, primary, 1 | Pulmonary arterial hypertension | Cardiovascular phenotype | ACVRL1-Related Disorders | ACVRL1-related condition | Pulmonary arterial hypertension related to hereditary hemorrhagic telangiectasia | not specified | Telangiectasia, hereditary hemorrhagic, type 1 | Abnormality of the pulmonary vasculature | Telangi…	Vascular
ACY1	Aminoacylase 1 deficiency | Inborn genetic diseases | Aminoacylase 1 deficiency, 609924 | Neurological conditions associated with aminoacylase 1 deficiency	CNS
ADA	Severe combined Immunodeficiency, autosomal recessive, T cell-negative, B cell-negative, NK cell-negative, due to adenosine deaminase deficiency | Severe combined Immunodeficiency disease | SCID due to ADA deficiency, delayed onset | Severe combined Immunodeficiency, autosomal recessive, T cell-negative, B cell-negative, NK cell-positive | not specified | Adenosine deaminase deficiency, partial, …	Immune_Blood
ADA2	Vasculitis due to ADA2 deficiency | Sneddon syndrome;Vasculitis due to ADA2 deficiency | Sneddon syndrome | ADA2-related condition | Vasculitis due to ADA2 deficiency;Sneddon syndrome | Splenomegaly | AutoInflammatory syndrome | Inherited Immunodeficiency Diseases | Stroke | Sneddon syndrome, 182410 | Vasculitis, autoinflammation, Immunodeficiency, and hematologic defects syndrome, 615688 | Diamo…	Immune_Blood
ADAD2	Non-obstructive azoospermia	Testis
ADAM10	Reticulate acropigmentation of Kitamura | Reticulate acropigmentation of Kitamura, 615537 | Alzheimer disease 18, susceptibility to, 615590 | Cutis laxa, autosomal recessive, type IIC, 617402 | Atrial fibrillation, familial, 6, 612201	CNS	Skin
ADAM17	Inflammatory skin and bowel disease, neonatal, 1 | Inflammatory skin and bowel disease, neonatal, 1, 614328 | Neonatal Inflammatory skin and bowel disease	Skin	Intestine
ADAM22	Developmental and epileptic encephalopathy, 61 | Developmental and epileptic encephalopathy 61, 617933 | Atrial septal defect 1	CNS
ADAM9	Cone-rod dystrophy | Cone-rod dystrophy 9 | Cone-rod dystrophy 9, 612775 | Cone rod dystrophy	Eye
ADAMTS10	Weill-Marchesani syndrome 1 | Weill-Marchesani syndrome 1, recessive, 277600 | Weill-Marchesani syndrome	Eye
ADAMTS13	ADAMTS13-related condition | Upshaw-Schulman syndrome | Thrombotic thrombocytopenic purpura | Abnormal bleeding;Thrombocytopenia | Thrombotic thrombocytopenic purpura, hereditary, 274150 | Congenital thrombotic thrombocytopenic purpura	Liver	Vascular
ADAMTS15	Arthrogryposis, distal, type 12 | Arthrogryposis, distal, type 12, 620545 | Boudin-Mortier syndrome, 619543	Connective
ADAMTS17	Weill-Marchesani 4 syndrome, recessive | Anterior segment dysgenesis | Weill-Marchesani 4 syndrome, recessive, 613195 | Ichthyosis-short stature-brachydactyly-microspherophakia syndrome | Myelofibrosis, somatic, 254450	Many
ADAMTS18	ADAMTS18-related condition | Microcornea-myopic chorioretinal atrophy | Microcornea, myopic chorioretinal atrophy, and telecanthus, 615458 | Microcornea-myopic chorioretinal atrophy-telecanthus syndrome	Eye
ADAMTS19	Cardiac valvular dysplasia 2 | Cardiac valvular dysplasia 2, 620067 | Alopecia, androgenetic, 1	Heart
ADAMTS2	Ehlers-Danlos syndrome, dermatosparaxis type | Ehlers-Danlos syndrome, dermatosparaxis type, 225410 | Dermatosparaxis Ehlers-Danlos syndrome	Connective
ADAMTS3	Hennekam lymphangiectasia-lymphedema syndrome 3 | Inborn genetic diseases | Hennekam lymphangiectasia-lymphedema syndrome 3, 618154 | Hennekam syndrome | Distal renal tubular acidosis 1, 179800	Lymphatic
ADAMTSL2	Geleophysic dysplasia 1 | Abnormal facial shape | Geleophysic dysplasia 1, 231050 | Geleophysic dysplasia | Dermatosparaxis Ehlers-Danlos syndrome | Distal renal tubular acidosis 4 with hemolytic anemia, 611590	Connective
ADAMTSL4	ADAMTSL4-related condition | Ectopia lentis et pupillae | Ectopia lentis 2, Isolated, autosomal recessive | See cases | Ectopia lentis et pupillae;Ectopia lentis 2, Isolated, autosomal recessive | Ectopia lentis | Craniosynostosis with ectopia lentis | Ectopia lentis et pupillae, 225200 | Ectopia lentis, Isolated, autosomal recessive, 225100 | Isolated ectopia lentis	Eye
ADAR	Inborn genetic diseases | Symmetrical dyschromatosis of extremities;Aicardi-Goutieres syndrome 6 | Aicardi-Goutieres syndrome 6 | Symmetrical dyschromatosis of extremities | Inborn genetic diseases | Aicardi-Goutieres syndrome 6;Symmetrical dyschromatosis of extremities | ADAR-related condition | Aicardi-Goutieres syndrome 6, 615010 | Dyschromatosis symmetrica hereditaria, 127400 | Aicardi-Goutiè…	CNS	Immune_Blood
ADARB1	Neurodevelopmental disorder with hypotonia, microcephaly, and seizures | Neurodevelopmental disorder with hypotonia, microcephaly, and seizures, 618862 | Blood group, Swann, 601550	CNS
ADAT3	Intellectual disability-strabismus syndrome | Intellectual disability-strabismus syndrome | Neurodevelopmental disorder with brain abnormalities, poor growth, and dysmorphic facies, 615286	Many
ADCY1	Autosomal recessive nonsyndromic hearing loss 44 | Deafness, autosomal recessive 44, 610154 | Rare autosomal recessive non-syndromic sensorineural deafness type DFNB | Malaria, resistance to, 611162	Ear
ADCY10	Reduced sperm motility;Abnormal sperm morphology | Hypercalciuria, absorptive, susceptibility to, 143870 | Idiopathic hypercalciuria | Osteopetrosis, autosomal recessive 9, 620366	Kidney
ADCY5	Dyskinesia with orofacial involvement, autosomal dominant | Inborn genetic diseases | Dyskinesia with orofacial involvement, autosomal recessive | Neurodevelopmental delay | See cases | Neurodevelopmental disorder with hyperkinetic movements and dyskinesia | Dyskinesia with orofacial involvement, autosomal dominant, 606703 | Dyskinesia with orofacial involvement, autosomal recessive, 619647 | Neu…	CNS
ADCY6	Lethal congenital contracture syndrome 8 | Lethal congenital contracture syndrome 8, 616287 | Hypomyelination neuropathy-arthrogryposis syndrome | Leukemia/lymphoma, B-cell, 3	CNS
ADD3	Cerebral palsy, spastic quadriplegic, 3 | Cerebral palsy | Cerebral palsy, spastic quadriplegic, 3, 617008 | Inherited congenital spastic tetraplegia	CNS
ADGRE2	Vibratory urticaria | Vibratory urticaria, 125630 | Obesity, susceptibility to, 601665	Immune_Blood
ADGRG1	Bilateral fIrontoparietal polymicrogyria | Abnormal cerebral morphology | Polymicrogyria, bilateral perisylvian, autosomal recessive;Bilateral fIrontoparietal polymicrogyria | 7 conditions | Polymicrogyria, bilateral perisylvian, autosomal recessive | Inborn genetic diseases | Bilateral fIrontoparietal polymicrogyria;Polymicrogyria, bilateral perisylvian, autosomal recessive | Cortical dysplasia,…	CNS
ADGRG2	Congenital bilateral aplasia of vas deferens from CFTR mutation | Vas deferens, congenital bilateral aplasia of, X-linked | Congenital bilateral absence of vas deferens, X-linked, 300985 | Congenital bilateral absence of vas deferens | Biliary cirrhosis, primary, 1	Testis
ADGRG6	Arthrogryposis multiplex congenita | Lethal congenital contracture syndrome 9 | Lethal congenital contracture syndrome 9, 616503 | Hyperbiliverdinemia, 614156	Skeletal_Muscle
ADGRL1	Developmental delay, behavioral abnormalities, and neuropsychiatric disorders | Seizure;Global developmental delay;Autistic behavior;Attention deficit hyperactivity disorder | Global developmental delay | Intellectual disability;Global developmental delay;Autistic behavior;Attention deficit hyperactivity disorder | Intellectual disability;Global developmental delay | Specific learning disability;…	CNS
ADGRV1	Usher syndrome type 2C | Usher syndrome | Febrile seizures, familial, 4 | Rare genetic deafness | Usher syndrome type 2 | Retinal dystrophy | Usher syndrome type 2A | ADGRV1-related condition | Usher syndrome, type IIC, GPR98/PDZD7 digenic | Usher syndrome type 2C;Febrile seizures, familial, 4 | ADGRV1-Related Disorders | Febrile seizures, familial, 4;Usher syndrome type 2C | Hearing impairment |…	Eye	Ear
ADH5	AMED syndrome, digenic | AMED syndrome, digenic, 619151	Immune_Blood
ADIPOQ	Adiponectin deficiency | Adiponectin deficiency, 612556 | Short stature, facial dysmorphism, and skeletal anomalies with or without cardiac anomalies 1, 617877	Fat
ADIPOR1	Retinal disorders	Eye
ADK	ADK-related condition | Adenosine kinase deficiency | Hypermethioninemia due to adenosine kinase deficiency, 614300 | Hypermethioninemia encephalopathy due to adenosine kinase deficiency	Liver
ADNP	ADNP-related multiple congenital anomalies - Intellectual disability - autism spectrum disorder | Inborn genetic diseases | Intellectual disability | ADNP-related condition | Neurodevelopmental disorder | See cases | 8 conditions | Intellectual deficiency;Autism, severe | Global developmental delay | Helsmoortel-van der Aa syndrome, 615873 | ADNP syndrome	CNS
ADPRS	Neurodegeneration, childhood-onset, stress-induced, with variable ataxia and seizures | Neurodegeneration, childhood-onset, stress-induced, with variable ataxia and seizures, 618170	Liver
ADRA2A	Lipodystrophy, familial partial, type 8 | ADHD susceptibility	CNS
ADSL	Adenylosuccinate lyase deficiency | Severe global developmental delay;Inability to walk;Difficulty standing;Progressive neurologic deterioration;Generalized myoclonic seizure | Inborn genetic diseases | ADSL-related condition | Generalized myoclonic seizure;Progressive neurologic deterioration;Severe global developmental delay;Inability to walk;Difficulty standing | Adenylosuccinase deficiency, 1…	CNS
ADSS1	Arthrogryposis multiplex congenita;Fetal akinesia deformation sequence 1 | Myopathy, distal, 5 | ADSS1-related condition | Myopathy, distal, 5, 617030 | Adenylosuccinate synthetase-like 1-related distal myopathy | Epidermolysis bullosa, junctional 4, intermediate, 619787	Skeletal_Muscle
AEBP1	Ehlers-Danlos syndrome, classic-like, 2 | Ehlers-Danlos syndrome, classic type, 1 | Ehlers-Danlos syndrome, classic-like, 2, 618000 | Classical-like Ehlers-Danlos syndrome type 2 | Epithelial recurrent erosion dystrophy, 122400	Connective
AFF2	FRAXE | Inborn genetic diseases | Intellectual disability | Intellectual developmental disorder, X-linked 109, 309548 | FRAXE Intellectual disability | Intellectual developmental disorder, autosomal dominant 3, 612580	CNS
AFF3	AFF3-related neurodevelopmental disorders | KINSSHIP syndrome | Inborn genetic diseases | KINSSHIP syndrome, 619297 | Mesomelic dysplasia-digital anomalies-Intellectual disability syndrome	Many
AFF4	Cognitive impairment - coarse facies - heart defects - obesity - pulmonary involvement - short stature - skeletal dysplasia syndrome | CHOPS syndrome, 616368 | Cognitive impairment-coarse facies-Heart defects-obesity-pulmonary involvement-short stature-skeletal dysplasia syndrome | Agenesis of corpus callosum, cardiac, ocular, and genital syndrome, 618929	Many
AFG2A	Microcephaly-Intellectual disability-sensorineural hearing loss-epilepsy-abnormal muscle tone syndrome | Inborn genetic diseases | AFG2A-related condition | Neurodevelopmental disorder | Neurodevelopmental disorder with Earing loss, seizures, and brain abnormalities, 616577 | Microcephaly-Intellectual disability-sensorineural Earing loss-epilepsy-abnormal muscle tone syndrome	CNS
AFG2B	SPATA5L1-associated disorder | Hearing loss, autosomal recessive 119 | Neurodevelopmental disorder with hearing loss and spasticity | See cases | Neurodevelopmental delay | AFG2B-related condition | Deafness, autosomal recessive 119, 619615 | Neurodevelopmental disorder with Earing loss and spasticity, 619616 | Rare autosomal recessive non-syndromic sensorineural deafness type DFNB | Ectodermal d…	CNS	Ear
AFG3L2	Spastic ataxia 5 | Spinocerebellar ataxia type 28 | Spinocerebellar ataxia type 28;Optic atrophy 12;Spastic ataxia 5 | Optic atrophy | Optic atrophy 12 | Intellectual disability;Optic atrophy | Reduced tendon reflexes;Optic atrophy | Sensorineural hearing loss disorder;Optic atrophy | Spinocerebellar ataxia type 28;Spastic ataxia 5;Optic atrophy 12 | Optic atrophy;Spastic paraparesis | Optic atro…	CNS
AFP	Alpha-fetoprotein deficiency | Alpha-fetoprotein deficiency, 615969 | Hereditary persistence of alpha-fetoprotein, 615970 | Hereditary persistence of alpha-fetoprotein | Congenital deficiency in alpha-fetoprotein | Peeling skin with leukonychia, acral punctate keratoses, cheilitis, and knuckle pads, 616295 | Arthrogryposis, cleft palate, craniosynostosis, and impaired Intellectual development, 61…	Liver
AGA	Aspartylglucosaminuria | Inborn genetic diseases | Aspartylglucosaminuria, finnish type | Aspartylglucosaminuria, 208400	Immune_Blood
AGBL5	Autosomal recessive retinitis pigmentosa | Retinitis pigmentosa | Retinitis pigmentosa 75, 617023	Eye
AGK	Sengers syndrome | Cataract 38 | Inborn genetic diseases | Autosomal recessive AGK-related phenotype | Cataract 38;Sengers syndrome | Sengers syndrome;Cataract 38 | AGK-Related Disorders | Trichohepatoenteric syndrome 1 | Cataract 38, autosomal recessive, 614691 | Sengers syndrome, 212350 | Congenital cataract-hypertrophic cardiomyopathy-mitochondrial myopathy syndrome | Total early-onset cataract	Eye
AGL	Glycogen storage disease type III | Glycogen storage disease IIIa | Inborn genetic diseases | Glycogen storage disease IIIb | Abnormality of metabolism/homeostasis | AGL-related condition | Glycogen storage disease IIIc | Glycogen storage disease | Glycogen storage disease IIIa, 232400 | Glycogen storage disease IIIb, 232400 | Glycogen storage disease due to glycogen debranching enzyme deficiency	Liver	Skeletal_Muscle
AGO1	Intellectual disability | Neurodevelopmental disorder with language delay and behavioral abnormalities, with or without seizures | not specified | Intellectual disability | AGO1-related condition | AGO1-associated disorder | AGO1-related neurodevelopmental disorder | Neurodevelopmental disorder with language delay and behavioral abnormalities, with or without seizures, 620292 | Non-specific syndr…	CNS
AGO2	Lessel-Kreienkamp syndrome | Neurodevelopmental disorder | Inborn genetic diseases | Lessel-Kreienkamp syndrome, 619149 | Non-specific syndromic Intellectual disability	CNS
AGPAT2	Congenital generalized lipodystrophy type 1 | Congenital generalized lipodystrophy | Lipodystrophy, congenital generalized, type 1, 608594	Fat
AGPAT3	Intellectual disability | Intellectual disability and retinitis pigmentosa (IDRP) syndrome	CNS	Eye
AGPS	Rhizomelic chondrodysplasia punctata type 3 | Rhizomelic chondrodysplasia punctata, type 3, 600121	Many
AGR2	Respiratory infections, recurrent, and failure to thrive with or without diarrhea | Respiratory infections, recurrent, and failure to thrive with or without diarrhea, 620233	Lung
AGRN	Congenital myasthenic syndrome 8 | Congenital myasthenic syndrome | Abnormality of the musculature | Myasthenic syndrome, congenital, 8, with pre- and postsynaptic defects, 615120 | Presynaptic congenital myasthenic syndromes | Postsynaptic congenital myasthenic syndromes | Sinoatrial node dysfunction and deafness, 614896	PNS	Skeletal_Muscle
AGRP	Leanness, inherited | Obesity, late-onset | Leanness, inherited, 601665 | Obesity, late-onset, 601665 | Congenital myopathy 18 due to dihydropyridine receptor defect, 620246 | Hypokalemic periodic paralysis, type 1, 170400	Many
AGT	Renal tubular dysgenesis | Essential hypertension, genetic;Renal tubular dysgenesis of genetic origin | Renal tubular dysgenesis, 267430 | Hypertension, essential, susceptibility to, 145500 | Preeclampsia, susceptibility to | NON RARE IN EUROPE: Essential hypertension | Renal tubular dysgenesis of genetic origin | Thyrotoxic periodic paralysis, susceptibility to, 1, 188580 | Spastic paraplegia 76…	Kidney
AGTPBP1	Neurodegeneration, childhood-onset, with cerebellar atrophy | AGTPBP1-related condition | Global developmental delay;Aplasia/Hypoplasia of the cerebellum | Neurodegeneration, childhood-onset, with cerebellar atrophy, 618276 | Pontocerebellar hypoplasia type 1 | Muscular dystrophy, limb-girdle, autosomal recessive 1, 253600	CNS
AGTR1	Essential hypertension, genetic | Renal tubular dysgenesis of genetic origin | Renal tubular dysgenesis | Renal tubular dysgenesis, 267430 | Hypertension, essential, 145500 | NON RARE IN EUROPE: Essential hypertension | Myopathy, vacuolar, with CASQ1 aggregates, 616231 | Ventricular tachycardia, catecholaminergic polymorphic, 2, 611938	Kidney
AGXT	Primary hyperoxaluria, type I | Primary hyperoxaluria | Nephrotic syndrome | AGXT-related condition | Nephrolithiasis;Nephrocalcinosis | Abnormality of metabolism/homeostasis | Hyperoxaluria, primary, type 1, 259900 | Primary hyperoxaluria type 1	Liver
AHCY	Hypermethioninemia with deficiency of S-adenosylhomocysteine hydrolase | Inborn genetic diseases | Rhabdomyolysis | Hypermethioninemia with deficiency of S-adenosylhomocysteine hydrolase, 613752 | S-adenosylhomocysteine hydrolase deficiency	Liver
AHDC1	AHDC1-related Intellectual disability - obstructive sleep apnea - mild dysmorphism syndrome | AHDC1-related condition | Inborn genetic diseases | Neurodevelopmental abnormality | Sleep apnea;Intellectual disability;Global developmental delay;Delayed speech and language development;Neonatal hypotonia | Sleep apnea;Delayed speech and language development;Hypotonia | Cerebellar vermis hypoplasia;AHD…	CNS
AHI1	Familial aplasia of the vermis | Joubert syndrome 3 | Inborn genetic diseases | Retinal dystrophy | Joubert syndrome with ocular defect | Joubert syndrome and related disorders | Joubert syndrome 1 | AHI1-related condition | NephIronophthisis | Rod-cone dystrophy | Global developmental delay;Typical Joubert syndrome MRI findings | Retinitis pigmentosa | Leber congenital amaurosis | See cases | Jo…	Many
AHR	Retinitis pigmentosa 85 | Retinitis pigmentosa 85, 618345 | Retinitis pigmentosa	Eye
AHSG	Alopecia-Intellectual disability syndrome 1 | Alopecia-Intellectual disability syndrome 1, 203650 | Alopecia-Intellectual disability syndrome | Drug metabolism, altered, CES1-related, 618057	Skin	CNS
AICDA	Hyper-IgM syndrome type 2 | AICDA-related condition | Immunodeficiency with hyper-IgM, type 2, 605258	Immune_Blood
AIFM1	Severe X-linked mitochondrial encephalomyopathy | Charcot-Marie-Tooth disease X-linked recessive 4 | Spondyloepimetaphyseal dysplasia, Bieganski type | Deafness, X-linked 5 | Combined oxidative phosphorylation deficiency;Charcot-Marie-Tooth Neuropathy X | Ear malformation | Foot dorsiflexor weakness;Distal muscle weakness;Sensorineural hearing loss disorder;Pes planus | Combined oxidative phospho…	CNS	Skeletal_Muscle
AIMP1	Hypomyelinating leukodystrophy 3 | AIMP1-related condition | Hypotonia | Leukodystrophy, hypomyelinating, 3, 260600 | Pelizaeus-Merzbacher-like disease due to AIMP1 mutation | Autosomal recessive non-syndromic Intellectual disability	CNS
AIMP2	Inborn genetic diseases | Leukodystrophy, hypomyelinating, 17 | Inborn genetic diseases | Leukodystrophy, hypomyelinating, 17, 618006	CNS
AIP	Somatotroph adenoma | Hereditary cancer-predisposing syndrome | Pituitary adenoma predisposition | Pituitary adenoma 1, multiple types, 102200 | Pituitary adenoma predisposition, 102200 | Acromegaly | Prolactinoma | Familial Isolated pituitary adenoma | Silent pituitary adenoma | Null pituitary adenoma | Pituitary gigantism	CNS
AIPL1	Leber congenital amaurosis 4 | Retinitis pigmentosa | Leber congenital amaurosis | Leber congenital amaurosis 4;Retinitis pigmentosa | AIPL1-Related Disorders | Retinal dystrophy | Retinitis pigmentosa;Leber congenital amaurosis 4 | Cone-rod dystrophy, 604393 | Leber congenital amaurosis 4, 604393 | Retinitis pigmentosa, juvenile, 604393 | Cone rod dystrophy	Eye
AIRE	Polyglandular Autoimmune syndrome, type 1 | Inherited Immunodeficiency Diseases | Autoimmune polyglandular syndrome type 1, with reversible metaphyseal dysplasia | AIRE-related condition | Autoimmune polyglandular syndrome type 1, autosomal dominant | Autoimmune polyendocrinopathy syndrome , type I, with or without reversible metaphyseal dysplasia, 240300 | Familial Isolated hypoparathyroidism du…	Immune_Blood	Eye
AK1	Hemolytic anemia due to adenylate kinase deficiency | Adenylate kinase deficiency | Hemolytic anemia due to adenylate kinase deficiency, 612631	Immune_Blood
AK2	Reticular dysgenesis | Severe combined Immunodeficiency disease | Reticular dysgenesis, 267500	Immune_Blood
AK7	Spermatogenic failure 27 | Spermatogenic failure 27, 617965 | Non-syndromic male infertility due to sperm motility disorder | Global developmental delay with or without impaired Intellectual development, 618330	Testis
AK9	Spermatogenic failure 89	Testis
AKAP3	Spermatogenic failure 82 | Spermatogenic failure 82, 620353 | Male infertility due to large-headed multiflagellar polyploid spermatozoa | Leukemia, acute myeloid, 601626	Testis
AKR1C2	46,XY disorder of sex development due to testicular 17,20-desmolase deficiency | 46XY sex reversal 8, 614279 | 46,XY difference of sex development due to testicular 17,20-desmolase deficiency | Deafness, autosomal dominant 70, 616968	Many
AKR1D1	Congenital bile acid synthesis defect 2 | Bile acid synthesis defect, congenital, 2, 235555 | Congenital bile acid synthesis defect type 2	Liver
AKT1	Proteus syndrome | Cowden syndrome 6 | Breast adenocarcinoma | Carcinoma of colon | Neoplasm of ovary | Breast neoplasm | Prostate adenocarcinoma | Non-small cell lung carcinoma | Small cell lung carcinoma | Thyroid tumor | Bone osteosarcoma | Neoplasm of uterine cervix | Squamous cell lung carcinoma | Transitional cell carcinoma of the bladder | Hepatocellular carcinoma | Gastric adenocarcinoma …	Many
AKT2	Hypoinsulinemic hypoglycemia and body hemihypertrophy | Diabetes mellitus, type II, 125853 | Hypoinsulinemic hypoglycemia with hemihypertrophy, 240900 | AKT2-related familial partial lipodystrophy	Fat	Skeletal_Muscle
AKT3	Megalencephaly-polymicrogyria-polydactyly-hydrocephalus syndrome 2 | Megalencephaly-capillary malformation-polymicrogyria syndrome | Overgrowth syndrome and/or cerebral malformations due to abnormalities in MTOR pathway genes | Macrocephaly;Capillary hemangioma;Global developmental delay;Polymicrogyria | Inborn genetic diseases | See cases | AKT3-related condition | Megalencephaly-polymicrogyria-…	CNS
ALAD	Porphobilinogen synthase deficiency | Porphyria, acute hepatic, 612740 | Lead poisoning, susceptibility to, 612740 | Porphyria due to ALA dehydratase deficiency	Liver	Immune_Blood
ALAS2	X-linked erythropoietic protoporphyria | Erythema | X-linked sideroblastic anemia 1 | Sideroblastic anemia 1, late-onset | Anemia, sideroblastic, 1, 300751 | Protoporphyria, erythropoietic, X-linked, 300752 | X-linked sideroblastic anemia	Liver	Immune_Blood
ALB	Analbuminemia | Alloalbuminemia | Hyperthyroxinemia, familial dysalbuminemic | ALBUMIN B | not specified | Analbuminemia Baghdad | Ehlers-Danlos syndrome, arthrochalasis type | Dysalbuminemic hypertriiodothyIroninemia, 615999 | Analbuminemia, 616000 | Dysalbuminemic hyperthyroxinemia, 615999 | NON RARE IN EUROPE: Familial dysalbuminemic hyperthyroxinemia | Congenital analbuminemia	Liver
ALDH18A1	ALDH18A1-related de Barsy syndrome | de Barsy syndrome;Cutis laxa, autosomal dominant 3;Hereditary spastic paraplegia 9A | Cutis laxa, autosomal dominant 3;Hereditary spastic paraplegia 9A;de Barsy syndrome | Hereditary spastic paraplegia 9A | ALDH18A1 deficiency | Hereditary spastic paraplegia 9A;de Barsy syndrome;Cutis laxa, autosomal dominant 3 | Abnormality of the nervous system | Inborn gene…	Many
ALDH1A2	Diaphragmatic hernia 4, with cardiovascular defects | Diaphragmatic hernia 4, with cardiovascular defects, 620025 | Lung cancer susceptibility 2, 612052	Many
ALDH1A3	Microphthalmia | Isolated microphthalmia 8 | Isolated anophthalmia-microphthalmia syndrome | Microphthalmia, Isolated 8, 615113 | Nanophthalmos | Colobomatous microphthalmia | Epilepsy, nocturnal fIrontal lobe, 1, 600513	Eye
ALDH3A2	Sjögren-Larsson syndrome | Sjogren-Larsson syndrome, 270200	Skin
ALDH4A1	Hyperprolinemia type 2 | Hyperprolinemia, type II, 239510	CNS
ALDH5A1	Succinate-semialdehyde dehydrogenase deficiency | Inborn genetic diseases | ALDH5A1-related condition | See cases | Succinic semialdehyde dehydrogenase deficiency, 271980 | Succinic semialdehyde dehydrogenase deficiency	CNS
ALDH6A1	Methylmalonate semialdehyde dehydrogenase deficiency | Inborn genetic diseases | Methylmalonate semialdehyde dehydrogenase deficiency, 614105 | Developmental delay due to methylmalonate semialdehyde dehydrogenase deficiency	Liver
ALDH7A1	Pyridoxine-dependent epilepsy | Abnormality of the nervous system | Inborn genetic diseases | Ventriculomegaly;Seizure | See cases | Neonatal epileptic spasm | Developmental and epileptic encephalopathy, 13 | neonatal seizures | Seizure | Pyridoxine-dependent epilepsy caused by ALDH7A1 mutant | Epilepsy, early-onset, 4, vitamin B6-dependent, 266100	CNS
ALDOA	HNSHA due to aldolase A deficiency | Glycogen storage disease XII, 611881 | Glycogen storage disease due to aldolase A deficiency	Skeletal_Muscle	Immune_Blood
ALDOB	Hereditary fructosuria | Inborn genetic diseases | ALDOB-related condition | See cases | Fructose intolerance, hereditary, 229600 | Hereditary fructose intolerance	Liver
ALG1	ALG1-congenital disorder of glycosylation | Congenital disorder of glycosylation | Inborn genetic diseases | Encephalopathy | Congenital disorder of glycosylation type I | ALG1-related condition | Finnish congenital nephrotic syndrome | ALG12-congenital disorder of glycosylation | Congenital disorder of glycosylation, type Ik, 608540 | ALG1-CDG	Many
ALG11	ALG11-congenital disorder of glycosylation | Congenital disorder of glycosylation, type Ip, 613661 | ALG11-CDG	Many
ALG12	ALG12-congenital disorder of glycosylation | Inborn genetic diseases | ALG12-related condition | Congenital disorder of glycosylation, type Ig, 607143 | ALG12-CDG	Many
ALG13	Developmental and epileptic encephalopathy, 36 | Intellectual disability | Rare genetic Intellectual disability | Seizure | Microcephaly;Seizure;Neurodevelopmental delay;Hypotonia | Inborn genetic diseases | Neurodevelopmental delay | Developmental and epileptic encephalopathy 36, 300884 | X-linked non-syndromic Intellectual disability | ALG13-CDG	CNS
ALG14	Congenital myasthenic syndrome 15 | Myasthenic syndrome, congenital, 15, without tubular aggregates, 616227 | Intellectual developmental disorder with epilepsy, behavioral abnormalities, and coarse facies, 619031 | Myopathy, epilepsy, and progressive cerebral atrophy, 619036 | Congenital myasthenic syndromes with glycosylation defect	CNS	Skeletal_Muscle	MN
ALG2	Congenital myasthenic syndrome 14 | Congenital disorder of glycosylation type II | Congenital disorder of glycosylation, type Ii, 607906 | Myasthenic syndrome, congenital, 14, with tubular aggregates, 616228 | Congenital myasthenic syndromes with glycosylation defect | ALG2-CDG	Many
ALG3	ALG3-congenital disorder of glycosylation | Inborn genetic diseases | Congenital disorder of glycosylation, type Id, 601110 | ALG3-CDG	Many
ALG5	Polycystic kidney disease 7 | Polycystic kidney disease 7, 620056 | Autosomal dominant polycystic kidney disease | Transient bullous of the newborn, 131705	Kidney
ALG6	ALG6-congenital disorder of glycosylation 1C | ALG6-related condition | Congenital disorder of glycosylation, type Ic, 603147 | ALG6-CDG	Many
ALG8	ALG8 congenital disorder of glycosylation | Polycystic liver disease 3 with or without kidney cysts;ALG8 congenital disorder of glycosylation | Autosomal dominant polycystic liver disease | ALG8 congenital disorder of glycosylation;Polycystic liver disease 3 with or without kidney cysts | ALG8-related condition | Inborn genetic diseases | Polycystic liver disease 3 with or without kidney cysts | …	Many
ALG9	ALG9 congenital disorder of glycosylation | Polycystic kidney disease, adult type | Autosomal dominant polycystic liver disease;Polycystic kidney disease, adult type | Congenital disorder of glycosylation, type Il, 608776 | Gillessen-Kaesbach-Nishimura syndrome, 263210 | Autosomal dominant polycystic kidney disease | ALG9-CDG	Kidney
ALK	Neuroblastoma, susceptibility to, 3 | Neuroblastoma | Neoplasm of brain | Breast neoplasm | Hereditary cancer-predisposing syndrome | Lung adenocarcinoma | Non-small cell lung carcinoma | Benign Soft Tissue Neoplasm of Uncertain Differentiation | Neuroblastoma, susceptibility to, 3, 613014 | Inflammatory myofibroblastic tumor | Differentiated thyroid carcinoma | ALK-positive large B-cell lymphoma…	Many
ALKBH8	Intellectual developmental disorder, autosomal recessive 71 | Intellectual developmental disorder, autosomal recessive 71, 618504 | Autosomal recessive non-syndromic Intellectual disability	CNS
ALMS1	Alstrom syndrome | Leukodystrophy;Stage 5 chIronic kidney disease;Visual impairment;Hearing impairment | Cardiovascular phenotype | Inborn genetic diseases | Leber congenital amaurosis | Retinal dystrophy | Intellectual disability | Retinitis pigmentosa | Retinal dystrophy, early-onset severe | Stickler syndrome | Abnormality of the eye | Alstrom syndrome, 203800 | Alström syndrome	Many
ALOX12B	Lamellar Ichthyosis | Autosomal recessive congenital Ichthyosis 2 | Congenital ichthyosiform erythroderma;Congenital nonbullous ichthyosiform erythroderma | ALOX12B-related condition | Ichthyosis | Ichthyosis, congenital, autosomal recessive 2, 242100 | Self-improving collodion baby | Congenital ichthyosiform erythroderma	Skin
ALOXE3	Autosomal recessive congenital Ichthyosis 3 | ALOXE3-related condition | Autosomal recessive congenital Ichthyosis 2 | Ichthyosis | Lamellar Ichthyosis | Autosomal recessive congenital Ichthyosis | Congenital nonbullous ichthyosiform erythroderma | Ichthyosis, congenital, autosomal recessive 3, 606545 | Self-improving collodion baby | Congenital ichthyosiform erythroderma	Skin
ALPK1	Retinal dystrophy, optic nerve edema, splenomegaly, anhidrosis, and migraine headache syndrome | ROSAH syndrome, 614979 | Retinal dystrophy-optic nerve edema-splenomegaly-anhidrosis-migraine headache syndrome	Many
ALPK3	Cardiovascular phenotype | Cardiomyopathy, familial hypertrophic 27 | Hypertrophic cardiomyopathy | Cardiomyopathy | Neurodevelopmental disorder | ALPK3-related disorder | ALPK3-related condition | Cardiomyopathy, familial hypertrophic 27, 618052	Heart
ALPL	Hypophosphatasia | Adult hypophosphatasia | IInfantile hypophosphatasia | Childhood hypophosphatasia;IInfantile hypophosphatasia;Adult hypophosphatasia | Skeletal dysplasia | Childhood hypophosphatasia;Adult hypophosphatasia;IInfantile hypophosphatasia | ALPL-related condition | Childhood hypophosphatasia | Low alkaline phosphatase | Adult hypophosphatasia;Childhood hypophosphatasia;IInfantile hy…	CNS	Bone
ALS2	Infantile-onset ascending hereditary spastic paralysis | Amyotrophic lateral sclerosis type 2, juvenile | Juvenile primary lateral sclerosis | IInfantile-onset ascending hereditary spastic paralysis | Inborn genetic diseases | Juvenile primary lateral sclerosis;Amyotrophic lateral sclerosis type 2, juvenile;IInfantile-onset ascending hereditary spastic paralysis | Amyotrophic lateral sclerosis ty…	MN	CNS
ALX1	FIrontonasal dysplasia - severe microphthalmia - severe facial clefting syndrome | FIrontonasal dysplasia 3, 613456 | FIrontonasal dysplasia-severe microphthalmia-severe facial clefting syndrome | Combined osteogenesis imperfecta and Ehlers-Danlos syndrome 2, 619120	Many
ALX3	FIrontorhiny | FIrontonasal dysplasia 1, 136760 | Ehlers-Danlos syndrome, arthrochalasia type, 2, 617821	Many
ALX4	Parietal foramina 2 | FIrontonasal dysplasia with alopecia and genital anomaly | Inborn genetic diseases | FIrontonasal dysplasia 2, 613451 | Parietal foramina 2, 609597 | Craniosynostosis 5, susceptibility to, 615529 | FIrontonasal dysplasia-alopecia-genital anomalies syndrome | Enlarged parietal foramina | Non-syndromic sagittal craniosynostosis | Potocki-Shaffer syndrome	Many
AMACR	Congenital bile acid synthesis defect 4 | Alpha-methylacyl-CoA racemase deficiency | Alpha-methylacyl-CoA racemase deficiency, 614307 | Bile acid synthesis defect, congenital, 4, 214950 | Congenital bile acid synthesis defect type 4	Liver	Eye
AMBN	Amelogenesis imperfecta type 1F | Amelogenesis imperfecta, type IF, 616270 | Hypoplastic amelogenesis imperfecta | Ehlers-Danlos syndrome, vascular type, 130050	Teeth
AMELX	Amelogenesis imperfecta type 1E | Amelogenesis imperfecta | Amelogenesis imperfecta, type 1E, 301200 | Hypomaturation amelogenesis imperfecta | Polymicrogyria with or without vascular-type EDS, 618343	Teeth
AMER1	Colorectal cancer | Osteopathia striata with cranial sclerosis | Cleft palate | Inborn genetic diseases | AMER1-related condition | Osteopathia striata with cranial sclerosis, 300373 | Osteopathia striata-cranial sclerosis syndrome	Bone
AMFR	Spastic paraplegia 89, autosomal recessive | Spastic paraplegia 89, autosomal recessive, 620379 | Epiphyseal dysplasia, multiple, 6, 614135	CNS
AMH	Persistent mullerian duct syndrome, type I | Persistent Mullerian duct syndrome | AMH-related condition | Persistent Mullerian duct syndrome, type I, 261550 | Persistent Müllerian duct syndrome | Stickler syndrome, type IV, 614134	Many
AMHR2	Persistent mullerian duct syndrome, type II | Persistent Mullerian duct syndrome | Male pseudohermaphroditism | Genetic non-acquired premature ovarian failure | Persistent Mullerian duct syndrome, type II, 261550 | Persistent Müllerian duct syndrome | Ehlers-Danlos syndrome, classic type, 1, 130000	Many
AMMECR1	Midface hypoplasia, hearing impairment, elliptocytosis, and nephrocalcinosis | Short stature | Midface hypoplasia, Earing impairment, elliptocytosis, and nephrocalcinosis, 300990 | Alport syndrome-Intellectual disability-midface hypoplasia-elliptocytosis syndrome | Bethlem myopathy 1, 158810	Many
AMN	merslund-Grasbeck syndrome | Imerslund-Grasbeck syndrome type 1 | Imerslund-Grasbeck syndrome | Imerslund-Grasbeck syndrome type 2 | Cobalamin deficiency;Megaloblastic anemia | Imerslund-Grasbeck syndrome 2, 618882 | Imerslund-Gräsbeck syndrome	Intestine
AMOTL1	not provided	Many
AMPD2	Hereditary spastic paraplegia 63 | Spastic ataxia | Pontocerebellar hypoplasia type 9 | Hereditary spastic paraplegia 63;Pontocerebellar hypoplasia type 9 | Abnormality of the nervous system | Spastic paraplegia 63, 615686 | Pontocerebellar hypoplasia, type 9, 615809 | Autosomal recessive spastic paraplegia type 63 | Bethlem myopathy 1, 158810 | Ullrich congenital muscular dystrophy 1, 254090	CNS	Skeletal_Muscle
AMPD3	Erythrocyte AMP deaminase deficiency | AMP deaminase deficiency, erythrocytic, 612874 | Adenosine monophosphate deaminase deficiency | Bethlem myopathy 1, 158810	Immune_Blood
AMT	Non-ketotic hyperglycinemia | Glycine encephalopathy 2 | Neurodevelopmental delay | See cases | Glycine encephalopathy 2, 620398 | Atypical glycine encephalopathy | Neonatal glycine encephalopathy | IInfantile glycine encephalopathy	Liver	CNS	Many
ANAPC1	Rothmund-Thomson syndrome type 1 | Rothmund-Thomson syndrome, type 1, 618625	Many
ANG	Amyotrophic lateral sclerosis type 9 | Amyotrophic lateral sclerosis 9, 611895 | Amyotrophic lateral sclerosis	MN	CNS
ANGPT2	Lymphatic malformation 10 | Lymphatic malformation 10, 619369 | Non-iImmune hydrops fetalis | Milroy disease | Intervertebral disc disease, susceptibility to, 603932	Lymphatic
ANGPTL3	Inborn genetic diseases | Familial hypobetalipoproteinemia 2 | ANGPTL3-related condition | Developmental and epileptic encephalopathy, 23 | Hypobetalipoproteinemia, familial, 2, 605019 | NON RARE IN EUROPE: Familial hypobetalipoproteinemia	Liver
ANK1	Hereditary spherocytosis type 1 | ANK1-related condition | Spherocytosis, type 1, autosomal recessive | Spherocytosis, type 1, 182900 | 8p11.2 deletion syndrome | Hereditary spherocytosis	Immune_Blood
ANK2	ANK2-associated Neurodevelopmental Disorder | Cardiovascular phenotype | Inborn genetic diseases | Cardiac arrhythmia, ankyrin-B-related | Autism spectrum disorder | Cardiac arrhythmia, ankyrin-B-related, 600919 | Long QT syndrome 4, 600919 | Romano-Ward syndrome | COPD, rate of decline of lung function in, 606963 | Epidermolysis bullosa dystrophica, autosomal recessive, modifier of, 226600	Heart
ANK3	ANK3-related disorder | Classic medulloblastoma | Intellectual disability-hypotonia-spasticity-sleep disorder syndrome | Inborn genetic diseases | Intellectual developmental disorder, autosomal recessive 37, 615493 | ANK3-related Intellectual disability-sleep disturbance syndrome | Multicentric osteolysis, nodulosis, and arthropathy, 259600	CNS
ANKH	Craniometaphyseal dysplasia, autosomal dominant | Chondrocalcinosis 2 | Chondrocalcinosis 2, sporadic | Chondrocalcinosis 2, 118600 | Craniometaphyseal dysplasia, 123000 | Familial calcium pyrophosphate deposition | Craniometaphyseal dysplasia | Metaphyseal anadysplasia 2, 613073 | Lynch syndrome 2, 609310	Bone
ANKLE2	Microcephaly 16, primary, autosomal recessive | Vanishing white matter disease;Hypotonia;Intellectual disability | Microcephaly 16, primary, autosomal recessive, 616681 | Autosomal recessive primary microcephaly | Mismatch repair cancer syndrome 1, 276300	CNS
ANKRD11	KBG syndrome | ANKRD11-related condition | Intellectual disability | Inborn genetic diseases | Rare genetic Intellectual disability | See cases | Neurodevelopmental disorder | Abnormality of the nervous system | Global developmental delay | Developmental disorder | 8 conditions | Abnormal facial shape;Seizure;Conductive hearing impairment;Global developmental delay;Delayed speech and language dev…	Many
ANKRD17	Chopra-Amiel-Gordon syndrome | Chopra-Amiel-Gordon syndrome, 619504 | Non-specific syndromic Intellectual disability | Colorectal cancer, somatic, 114500	Many
ANKRD26	Thrombocytopenia 2 | Thrombocytopenia | Inherited bleeding disorder, platelet-type | Thrombocytopenia 2, 188000 | Autosomal thrombocytopenia with normal platelets | Familial platelet disorder with associated myeloid malignancy	Immune_Blood
ANKRD31	Genetic non-acquired premature ovarian failure	Ovary
ANKS3	Short stature | Situs inversus totalis	Many
ANKS6	NephIronophthisis 16 | NephIronophthisis 16, 615382 | IInfantile nephIronophthisis | Juvenile nephIronophthisis | Gaze palsy, familial horizontal, with progressive scoliosis, 2, 617542	Kidney
ANLN	Focal segmental glomerulosclerosis 8 | Focal segmental glomerulosclerosis 8, 616032 | Genetic steroid-resistant nephrotic syndrome | Mirror movements 1 and/or agenesis of the corpus callosum, 157600	Kidney
ANO1	MOYAMOYA DISEASE 7 | Intestinal dysmotility syndrome, 620045 | Spinocerebellar ataxia 43, 617018	Intestine
ANO10	Autosomal recessive spinocerebellar ataxia 10 | Autosomal recessive cerebellar ataxia | Abnormal central motor function | Spinocerebellar ataxia, autosomal recessive 10, 613728 | Adult-onset autosomal recessive cerebellar ataxia	CNS
ANO3	Dystonia 24 | Dystonic disorder | Dystonia 24, 615034 | Cranio-cervical dystonia with laryngeal and upper-limb involvement | C1q deficiency 1, 613652	CNS
ANO4	Early infantile epileptic encephalopathy with suppression bursts	CNS
ANO5	Autosomal recessive limb-girdle muscular dystrophy type 2L | Gnathodiaphyseal dysplasia;Autosomal recessive limb-girdle muscular dystrophy type 2L | Miyoshi muscular dystrophy 3 | Abnormality of the musculature | Autosomal recessive limb-girdle muscular dystrophy | Autosomal recessive limb-girdle muscular dystrophy type 2L;Gnathodiaphyseal dysplasia | Miyoshi muscular dystrophy 3;Gnathodiaphyseal…	Skeletal_Muscle
ANO6	SCOTT SYNDROME | ANO6-related condition | Scott syndrome, 262890 | Scott syndrome	Immune_Blood
ANOS1	Hypogonadotropic hypogonadism 1 with or without anosmia | ANOS1-related condition | Martsolf syndrome 1 | Hypogonadotropic hypogonadism 7 with or without anosmia | Delayed puberty | Hypogonadotropic hypogonadism 1 with or without anosmia (Kallmann syndrome 1), 308700 | Kallmann syndrome	CNS
ANTXR1	GAPO syndrome | GAPO syndrome, 230740 | Hemangioma, capillary iInfantile, susceptibility to, 602089 | NON RARE IN EUROPE: IInfantile capillary hemangioma	Vascular
ANTXR2	Hyaline fibromatosis syndrome | Hyaline fibromatosis syndrome, 228600 | Juvenile hyaline fibromatosis | IInfantile systemic hyalinosis	Skin
ANXA11	Oculopharyngeal muscular dystrophy | Amyotrophic lateral sclerosis type 23 | Inclusion body myopathy and brain white matter abnormalities | ANXA11-related condition | Amyotrophic lateral sclerosis 23, 617839 | Inclusion body myopathy and brain white matter abnormalities, 619733 | Amyotrophic lateral sclerosis	CNS
AOPEP	Dystonia 31 | Dystonia 31, 619565 | Eculizumab, poor response to, 615749	CNS
AP1B1	Autosomal recessive keratitis-Ichthyosis-deafness syndrome | Keratitis-Ichthyosis-deafness syndrome, autosomal recessive, 242150 | MEDNIK syndrome | Hemolytic uremic syndrome, atypical, susceptibility to, 2, 612922	Skin	Ear
AP1G1	Usmani-Riazuddin syndrome, autosomal recessive | Usmani-Riazuddin syndrome, autosomal dominant | Inborn genetic diseases | Usmani-Riazuddin syndrome, autosomal dominant, 619467 | Usmani-Riazuddin syndrome, autosomal recessive, 619548 | Non-specific syndromic Intellectual disability | C9 deficiency, 613825 | Macular degeneration, age-related, 15, susceptibility to, 615591	CNS
AP1S1	MEDNIK syndrome | MEDNIK syndrome, 609313	Intestine
AP1S2	Pettigrew syndrome | Inborn genetic diseases | Pettigrew syndrome;Fried syndrome | Pettigrew syndrome, 304340 | X-linked Intellectual disability-Dandy-Walker malformation-basal ganglia disease-seizures syndrome | X-linked Intellectual disability-hypotonia-facial dysmorphism-aggressive behavior syndrome | Fried syndrome	CNS
AP2M1	Intellectual developmental disorder 60 with seizures | Intellectual disability;Autism;Seizure | Intellectual developmental disorder 60 with seizures, 618587 | Myoclonic-astatic epilepsy	CNS
AP2S1	Familial hypocalciuric hypercalcemia 3 | Hypocalciuric hypercalcemia, type III, 600740 | Familial hypocalciuric hypercalcemia type 3	Parathyroid
AP3B1	Hermansky-Pudlak syndrome 2 | AutoInflammatory syndrome | Hermansky-Pudlak syndrome due to AP-3 deficiency	Many
AP3B2	Developmental and epileptic encephalopathy, 48 | Epileptic encephalopathy | Developmental and epileptic encephalopathy 48, 617276 | Non-specific early-onset epileptic encephalopathy	CNS
AP3D1	Hermansky-Pudlak syndrome 10 | Hermansky-Pudlak syndrome 10, 617050 | Ocular albinism with late-onset sensorineural deafness | X-linked recessive ocular albinism	Immune_Blood	Skin
AP4B1	Hereditary spastic paraplegia 47 | Spastic paraplegia | Inborn genetic diseases | Intellectual disability | Abnormality of the nervous system | AP4B1-related condition | Hereditary spastic paraplegia | Spastic paraplegia 47, autosomal recessive, 614066 | Severe Intellectual disability and progressive spastic paraplegia	CNS	Eye
AP4E1	Spastic paraplegia | Hereditary spastic paraplegia 51 | ALG12-congenital disorder of glycosylation | Spastic paraplegia 51, autosomal recessive, 613744 | Stuttering, familial persistent, 1, 184450 | Severe Intellectual disability and progressive spastic paraplegia | Atrial fibrillation, familial, 11, 614049 | Atrial standstill, digenic (GJA5/SCN5A), 108770	CNS
[truncated: 4,610 more rows]

## Sheet: Supplementary Table 3
AlleleID	Type	Number of Guides Found	HGVS_ID	HGVS_Simple	TranscriptID	GeneSymbol	Row_HE	Multi-tissue	Single_Tissue	SNV	Indel	MaxPrev	Has_Guide (1=Yes, 0=No)	Tissue
[truncated: 104,010 more rows]

[truncated: 6 more sheets: Supplementary Table 4, Supplementary Table 5, Supplementary Table 6, Supplementary Table 7, Supplementary Table 8, Supplementary Table 9]
